# Supplementary material
Source: publisher site journal article supplement (https://www.dovepress.com/get_supplementary_file.php?f=179043.xlsx)
Supplement: Supplementary file 1 [file get_supplementary_file.php]

## Sheet: Table S1
Table S1. GSEA results of c2 reference gene sets for high ERCC8 expression groups.
NAME	GS<br> follow link to MSigDB	GS DETAILS	SIZE	ES	NES	NOM p-val	FDR q-val	FWER p-val	RANK AT MAX	LEADING EDGE
BIOCARTA_PROTEASOME_PATHWAY	BIOCARTA_PROTEASOME_PATHWAY	Details ...	27	0.691605	2.03657	0	0.0994157	0.072	2989	tags=67%, list=23%, signal=86%
REACTOME_VIF_MEDIATED_DEGRADATION_OF_APOBEC3G	REACTOME_VIF_MEDIATED_DEGRADATION_OF_APOBEC3G	Details ...	48	0.628737	2.01209	0.00203666	0.0686028	0.104	3316	tags=58%, list=25%, signal=78%
REACTOME_SIGNALING_BY_WNT	REACTOME_SIGNALING_BY_WNT	Details ...	60	0.573289	1.96599	0	0.0972005	0.198	3316	tags=57%, list=25%, signal=76%
REACTOME_AUTODEGRADATION_OF_THE_E3_UBIQUITIN_LIGASE_COP1	REACTOME_AUTODEGRADATION_OF_THE_E3_UBIQUITIN_LIGASE_COP1	Details ...	45	0.633823	1.94407	0	0.0971298	0.266	3629	tags=64%, list=28%, signal=89%
WONG_MITOCHONDRIA_GENE_MODULE	WONG_MITOCHONDRIA_GENE_MODULE	Details ...	190	0.536838	1.9307	0	0.0912232	0.296	3561	tags=59%, list=27%, signal=81%
REACTOME_ACTIVATION_OF_NF_KAPPAB_IN_B_CELLS	REACTOME_ACTIVATION_OF_NF_KAPPAB_IN_B_CELLS	Details ...	57	0.595846	1.923	0.00618557	0.0860257	0.327	3316	tags=56%, list=25%, signal=75%
MOOTHA_MITOCHONDRIA	MOOTHA_MITOCHONDRIA	Details ...	430	0.50671	1.89745	0.00208333	0.103308	0.411	3214	tags=51%, list=25%, signal=66%
MOOTHA_HUMAN_MITODB_6_2002	MOOTHA_HUMAN_MITODB_6_2002	Details ...	417	0.522161	1.88991	0	0.0987677	0.436	3275	tags=53%, list=25%, signal=69%
REACTOME_RESPIRATORY_ELECTRON_TRANSPORT	REACTOME_RESPIRATORY_ELECTRON_TRANSPORT	Details ...	57	0.576916	1.88965	0.0141414	0.0883249	0.437	4234	tags=74%, list=32%, signal=109%
KEGG_PARKINSONS_DISEASE	KEGG_PARKINSONS_DISEASE	Details ...	97	0.48196	1.86808	0.0143149	0.111156	0.537	3819	tags=58%, list=29%, signal=81%
REACTOME_TCA_CYCLE_AND_RESPIRATORY_ELECTRON_TRANSPORT	REACTOME_TCA_CYCLE_AND_RESPIRATORY_ELECTRON_TRANSPORT	Details ...	107	0.523619	1.86283	0.016129	0.108645	0.562	3521	tags=56%, list=27%, signal=76%
REACTOME_P53_INDEPENDENT_G1_S_DNA_DAMAGE_CHECKPOINT	REACTOME_P53_INDEPENDENT_G1_S_DNA_DAMAGE_CHECKPOINT	Details ...	47	0.596902	1.86175	0.00414938	0.100755	0.564	3319	tags=60%, list=25%, signal=80%
REACTOME_RESPIRATORY_ELECTRON_TRANSPORT_ATP_SYNTHESIS_BY_CHEMIOSMOTIC_COUPLING_AND_HEAT_PRODUCTION_BY_UNCOUPLING_PROTEINS_	REACTOME_RESPIRATORY_ELECTRON_TRANSPORT_ATP_SYNTHESIS_BY_CHEMIOSMOTIC_COUPLING_AND_HEAT_PRODUCTION_BY_UNCOUPLING_PROTEINS_	Details ...	73	0.521004	1.84834	0.038	0.112769	0.623	3521	tags=59%, list=27%, signal=80%
REACTOME_CDK_MEDIATED_PHOSPHORYLATION_AND_REMOVAL_OF_CDC6	REACTOME_CDK_MEDIATED_PHOSPHORYLATION_AND_REMOVAL_OF_CDC6	Details ...	45	0.61238	1.83445	0.00816326	0.126243	0.675	3602	tags=62%, list=28%, signal=86%
REACTOME_REGULATION_OF_ORNITHINE_DECARBOXYLASE_ODC	REACTOME_REGULATION_OF_ORNITHINE_DECARBOXYLASE_ODC	Details ...	47	0.613028	1.82574	0.00817996	0.132672	0.708	3316	tags=60%, list=25%, signal=80%
KEGG_OXIDATIVE_PHOSPHORYLATION	KEGG_OXIDATIVE_PHOSPHORYLATION	Details ...	101	0.463317	1.82436	0.0368098	0.126772	0.713	3521	tags=53%, list=27%, signal=73%
REACTOME_DESTABILIZATION_OF_MRNA_BY_AUF1_HNRNP_D0	REACTOME_DESTABILIZATION_OF_MRNA_BY_AUF1_HNRNP_D0	Details ...	48	0.593129	1.8225	0.0102881	0.121645	0.717	3316	tags=54%, list=25%, signal=72%
REACTOME_METABOLISM_OF_AMINO_ACIDS_AND_DERIVATIVES	REACTOME_METABOLISM_OF_AMINO_ACIDS_AND_DERIVATIVES	Details ...	175	0.626877	1.81258	0.0040404	0.131359	0.75	1856	tags=47%, list=14%, signal=54%
REACTOME_AUTODEGRADATION_OF_CDH1_BY_CDH1_APC_C	REACTOME_AUTODEGRADATION_OF_CDH1_BY_CDH1_APC_C	Details ...	51	0.565144	1.7868	0.0123457	0.171171	0.829	3316	tags=55%, list=25%, signal=73%
MOOTHA_VOXPHOS	MOOTHA_VOXPHOS	Details ...	83	0.462111	1.78373	0.0273109	0.169459	0.835	4234	tags=64%, list=32%, signal=94%
REACTOME_SCF_BETA_TRCP_MEDIATED_DEGRADATION_OF_EMI1	REACTOME_SCF_BETA_TRCP_MEDIATED_DEGRADATION_OF_EMI1	Details ...	47	0.58609	1.78313	0.0160966	0.16287	0.835	3316	tags=57%, list=25%, signal=77%
REACTOME_CDT1_ASSOCIATION_WITH_THE_CDC6_ORC_ORIGIN_COMPLEX	REACTOME_CDT1_ASSOCIATION_WITH_THE_CDC6_ORC_ORIGIN_COMPLEX	Details ...	46	0.586939	1.77738	0.0184426	0.166373	0.843	3316	tags=57%, list=25%, signal=76%
REACTOME_REGULATION_OF_APOPTOSIS	REACTOME_REGULATION_OF_APOPTOSIS	Details ...	52	0.514404	1.75756	0.0326531	0.201596	0.891	3316	tags=52%, list=25%, signal=69%
WAKABAYASHI_ADIPOGENESIS_PPARG_RXRA_BOUND_WITH_H4K20ME1_MARK	WAKABAYASHI_ADIPOGENESIS_PPARG_RXRA_BOUND_WITH_H4K20ME1_MARK	Details ...	112	0.529237	1.75431	0.00396825	0.201377	0.899	2645	tags=46%, list=20%, signal=58%
KEGG_PROTEASOME	KEGG_PROTEASOME	Details ...	42	0.600789	1.74449	0.0245399	0.217527	0.921	3316	tags=60%, list=25%, signal=80%
KEGG_PEROXISOME	KEGG_PEROXISOME	Details ...	67	0.707952	1.73326	0.00831601	0.238353	0.935	2080	tags=63%, list=16%, signal=74%
REACTOME_BRANCHED_CHAIN_AMINO_ACID_CATABOLISM	REACTOME_BRANCHED_CHAIN_AMINO_ACID_CATABOLISM	Details ...	17	0.740898	1.72741	0.0119522	0.245366	0.941	1654	tags=65%, list=13%, signal=74%
REACTOME_SULFUR_AMINO_ACID_METABOLISM	REACTOME_SULFUR_AMINO_ACID_METABOLISM	Details ...	22	0.80934	1.7204	0.00410678	0.256555	0.949	1316	tags=73%, list=10%, signal=81%
STEIN_ESRRA_TARGETS_UP	STEIN_ESRRA_TARGETS_UP	Details ...	346	0.467432	1.71742	0.00409836	0.256004	0.949	2718	tags=45%, list=21%, signal=55%
KEGG_CYSTEINE_AND_METHIONINE_METABOLISM	KEGG_CYSTEINE_AND_METHIONINE_METABOLISM	Details ...	30	0.667347	1.7147	0.00803213	0.254647	0.951	1109	tags=40%, list=9%, signal=44%
SHEN_SMARCA2_TARGETS_UP	SHEN_SMARCA2_TARGETS_UP	Details ...	363	0.520482	1.71314	0.0221774	0.250632	0.953	3240	tags=56%, list=25%, signal=72%
BURTON_ADIPOGENESIS_5	BURTON_ADIPOGENESIS_5	Details ...	98	0.545604	1.71126	0.00607287	0.248608	0.953	2845	tags=60%, list=22%, signal=76%
KEGG_ARGININE_AND_PROLINE_METABOLISM	KEGG_ARGININE_AND_PROLINE_METABOLISM	Details ...	47	0.674773	1.71006	0	0.244719	0.954	1745	tags=49%, list=13%, signal=56%
FRASOR_RESPONSE_TO_SERM_OR_FULVESTRANT_UP	FRASOR_RESPONSE_TO_SERM_OR_FULVESTRANT_UP	Details ...	19	0.640891	1.70911	0.00819672	0.239413	0.954	2836	tags=63%, list=22%, signal=81%
REACTOME_GLYCOGEN_BREAKDOWN_GLYCOGENOLYSIS	REACTOME_GLYCOGEN_BREAKDOWN_GLYCOGENOLYSIS	Details ...	15	0.641292	1.70793	0.0178218	0.235802	0.956	1556	tags=33%, list=12%, signal=38%
REACTOME_CITRIC_ACID_CYCLE_TCA_CYCLE	REACTOME_CITRIC_ACID_CYCLE_TCA_CYCLE	Details ...	20	0.661482	1.70494	0.0178571	0.237047	0.959	2655	tags=60%, list=20%, signal=75%
BURTON_ADIPOGENESIS_6	BURTON_ADIPOGENESIS_6	Details ...	165	0.528797	1.69358	0.00798403	0.260831	0.966	2877	tags=52%, list=22%, signal=65%
REACTOME_ENOS_ACTIVATION_AND_REGULATION	REACTOME_ENOS_ACTIVATION_AND_REGULATION	Details ...	18	0.537523	1.69234	0.0176125	0.257263	0.966	1095	tags=33%, list=8%, signal=36%
KEGG_CITRATE_CYCLE_TCA_CYCLE	KEGG_CITRATE_CYCLE_TCA_CYCLE	Details ...	30	0.683537	1.68753	0.0202429	0.265013	0.971	2655	tags=67%, list=20%, signal=84%
MOOTHA_TCA	MOOTHA_TCA	Details ...	16	0.691994	1.68713	0.0119284	0.259244	0.971	2655	tags=63%, list=20%, signal=78%
KEGG_GLYCOSYLPHOSPHATIDYLINOSITOL_GPI_ANCHOR_BIOSYNTHESIS	KEGG_GLYCOSYLPHOSPHATIDYLINOSITOL_GPI_ANCHOR_BIOSYNTHESIS	Details ...	18	0.664824	1.68609	0.0101626	0.255351	0.972	2187	tags=61%, list=17%, signal=73%
REACTOME_POST_TRANSLATIONAL_PROTEIN_MODIFICATION	REACTOME_POST_TRANSLATIONAL_PROTEIN_MODIFICATION	Details ...	134	0.458664	1.68306	0.00205761	0.257465	0.974	2095	tags=38%, list=16%, signal=45%
KEGG_ALZHEIMERS_DISEASE	KEGG_ALZHEIMERS_DISEASE	Details ...	142	0.382478	1.68291	0.015748	0.25182	0.974	3720	tags=49%, list=29%, signal=68%
KEGG_VALINE_LEUCINE_AND_ISOLEUCINE_DEGRADATION	KEGG_VALINE_LEUCINE_AND_ISOLEUCINE_DEGRADATION	Details ...	42	0.705891	1.66926	0.0226804	0.283207	0.984	2707	tags=74%, list=21%, signal=93%
REACTOME_POST_TRANSLATIONAL_MODIFICATION_SYNTHESIS_OF_GPI_ANCHORED_PROTEINS	REACTOME_POST_TRANSLATIONAL_MODIFICATION_SYNTHESIS_OF_GPI_ANCHORED_PROTEINS	Details ...	20	0.607711	1.65665	0.0165631	0.314116	0.99	2187	tags=55%, list=17%, signal=66%
YAO_TEMPORAL_RESPONSE_TO_PROGESTERONE_CLUSTER_17	YAO_TEMPORAL_RESPONSE_TO_PROGESTERONE_CLUSTER_17	Details ...	150	0.437744	1.6503	0.0118343	0.327818	0.991	2855	tags=42%, list=22%, signal=53%
SHETH_LIVER_CANCER_VS_TXNIP_LOSS_PAM4	SHETH_LIVER_CANCER_VS_TXNIP_LOSS_PAM4	Details ...	204	0.565887	1.64944	0.00803213	0.324114	0.991	1398	tags=34%, list=11%, signal=37%
REACTOME_PYRUVATE_METABOLISM_AND_CITRIC_ACID_TCA_CYCLE	REACTOME_PYRUVATE_METABOLISM_AND_CITRIC_ACID_TCA_CYCLE	Details ...	38	0.568741	1.64852	0.0316206	0.320163	0.992	1613	tags=34%, list=12%, signal=39%
LUCAS_HNF4A_TARGETS_UP	LUCAS_HNF4A_TARGETS_UP	Details ...	54	0.625323	1.64609	0.0102459	0.320926	0.992	2344	tags=50%, list=18%, signal=61%
FARMER_BREAST_CANCER_CLUSTER_7	FARMER_BREAST_CANCER_CLUSTER_7	Details ...	18	0.720628	1.64593	0.013308	0.314904	0.992	1708	tags=50%, list=13%, signal=57%
MIZUSHIMA_AUTOPHAGOSOME_FORMATION	MIZUSHIMA_AUTOPHAGOSOME_FORMATION	Details ...	15	0.578036	1.64317	0.0361446	0.316773	0.992	3624	tags=53%, list=28%, signal=74%
REACTOME_ANTIGEN_PROCESSING_UBIQUITINATION_PROTEASOME_DEGRADATION	REACTOME_ANTIGEN_PROCESSING_UBIQUITINATION_PROTEASOME_DEGRADATION	Details ...	153	0.417874	1.64162	0.0241935	0.315537	0.993	3316	tags=46%, list=25%, signal=61%
HOSHIDA_LIVER_CANCER_SUBCLASS_S3	HOSHIDA_LIVER_CANCER_SUBCLASS_S3	Details ...	254	0.726765	1.64148	0.0257937	0.30999	0.993	1955	tags=63%, list=15%, signal=73%
YAO_TEMPORAL_RESPONSE_TO_PROGESTERONE_CLUSTER_13	YAO_TEMPORAL_RESPONSE_TO_PROGESTERONE_CLUSTER_13	Details ...	136	0.454313	1.64147	0.0141129	0.304266	0.993	3275	tags=49%, list=25%, signal=65%
REACTOME_P53_DEPENDENT_G1_DNA_DAMAGE_RESPONSE	REACTOME_P53_DEPENDENT_G1_DNA_DAMAGE_RESPONSE	Details ...	51	0.519672	1.63908	0.0497018	0.305659	0.993	3629	tags=61%, list=28%, signal=84%
REACTOME_DOWNSTREAM_SIGNALING_EVENTS_OF_B_CELL_RECEPTOR_BCR	REACTOME_DOWNSTREAM_SIGNALING_EVENTS_OF_B_CELL_RECEPTOR_BCR	Details ...	79	0.459868	1.63259	0.0323887	0.320758	0.996	3316	tags=48%, list=25%, signal=64%
REACTOME_REGULATION_OF_MRNA_STABILITY_BY_PROTEINS_THAT_BIND_AU_RICH_ELEMENTS	REACTOME_REGULATION_OF_MRNA_STABILITY_BY_PROTEINS_THAT_BIND_AU_RICH_ELEMENTS	Details ...	75	0.469481	1.63147	0.0363636	0.318982	0.996	3602	tags=49%, list=28%, signal=68%
WOO_LIVER_CANCER_RECURRENCE_DN	WOO_LIVER_CANCER_RECURRENCE_DN	Details ...	78	0.826489	1.62325	0.0185567	0.338808	0.998	1377	tags=78%, list=11%, signal=87%
HOSHIDA_LIVER_CANCER_SURVIVAL_DN	HOSHIDA_LIVER_CANCER_SURVIVAL_DN	Details ...	106	0.589352	1.61656	0.0261569	0.355221	0.998	2925	tags=60%, list=22%, signal=77%
BOCHKIS_FOXA2_TARGETS	BOCHKIS_FOXA2_TARGETS	Details ...	332	0.474327	1.61588	0.0177165	0.35147	0.999	2909	tags=45%, list=22%, signal=56%
KEGG_SNARE_INTERACTIONS_IN_VESICULAR_TRANSPORT	KEGG_SNARE_INTERACTIONS_IN_VESICULAR_TRANSPORT	Details ...	31	0.529332	1.61445	0.0241935	0.35012	0.999	3509	tags=55%, list=27%, signal=75%
GUTIERREZ_MULTIPLE_MYELOMA_UP	GUTIERREZ_MULTIPLE_MYELOMA_UP	Details ...	33	0.588723	1.61189	0.0542169	0.352978	0.999	3381	tags=67%, list=26%, signal=90%
REACTOME_ER_PHAGOSOME_PATHWAY	REACTOME_ER_PHAGOSOME_PATHWAY	Details ...	57	0.516385	1.61111	0.0684105	0.349932	0.999	3665	tags=54%, list=28%, signal=75%
CHIANG_LIVER_CANCER_SUBCLASS_POLYSOMY7_UP	CHIANG_LIVER_CANCER_SUBCLASS_POLYSOMY7_UP	Details ...	52	0.776662	1.61068	0.0164271	0.345661	0.999	1555	tags=69%, list=12%, signal=78%
LIM_MAMMARY_STEM_CELL_DN	LIM_MAMMARY_STEM_CELL_DN	Details ...	300	0.455593	1.60961	0.00585938	0.34371	0.999	2805	tags=42%, list=22%, signal=53%
CAIRO_LIVER_DEVELOPMENT_DN	CAIRO_LIVER_DEVELOPMENT_DN	Details ...	216	0.597291	1.60642	0.0351562	0.34969	0.999	2080	tags=45%, list=16%, signal=53%
PELLICCIOTTA_HDAC_IN_ANTIGEN_PRESENTATION_DN	PELLICCIOTTA_HDAC_IN_ANTIGEN_PRESENTATION_DN	Details ...	45	0.530995	1.60382	0.0764706	0.352637	0.999	3410	tags=56%, list=26%, signal=75%
MOOTHA_FFA_OXYDATION	MOOTHA_FFA_OXYDATION	Details ...	20	0.733072	1.60003	0.0255403	0.360097	0.999	2707	tags=80%, list=21%, signal=101%
STARK_PREFRONTAL_CORTEX_22Q11_DELETION_DN	STARK_PREFRONTAL_CORTEX_22Q11_DELETION_DN	Details ...	369	0.379557	1.59933	0.0120724	0.356878	0.999	3220	tags=41%, list=25%, signal=53%
REACTOME_PHASE_II_CONJUGATION	REACTOME_PHASE_II_CONJUGATION	Details ...	51	0.688436	1.59437	0.0187891	0.368464	0.999	3046	tags=75%, list=23%, signal=97%
LEE_LIVER_CANCER_SURVIVAL_UP	LEE_LIVER_CANCER_SURVIVAL_UP	Details ...	145	0.756429	1.59431	0.0351967	0.363415	0.999	1421	tags=62%, list=11%, signal=69%
KEGG_PROPANOATE_METABOLISM	KEGG_PROPANOATE_METABOLISM	Details ...	27	0.684695	1.58756	0.0453649	0.380441	0.999	2573	tags=70%, list=20%, signal=87%
ACEVEDO_NORMAL_TISSUE_ADJACENT_TO_LIVER_TUMOR_DN	ACEVEDO_NORMAL_TISSUE_ADJACENT_TO_LIVER_TUMOR_DN	Details ...	264	0.488403	1.58308	0.0234375	0.390657	0.999	2611	tags=40%, list=20%, signal=49%
KEGG_PYRUVATE_METABOLISM	KEGG_PYRUVATE_METABOLISM	Details ...	34	0.630568	1.58175	0.0340681	0.3897	0.999	1884	tags=50%, list=14%, signal=58%
STEIN_ESRRA_TARGETS	STEIN_ESRRA_TARGETS	Details ...	475	0.397654	1.58033	0.00798403	0.389727	0.999	2676	tags=38%, list=21%, signal=46%
REACTOME_CROSS_PRESENTATION_OF_SOLUBLE_EXOGENOUS_ANTIGENS_ENDOSOMES	REACTOME_CROSS_PRESENTATION_OF_SOLUBLE_EXOGENOUS_ANTIGENS_ENDOSOMES	Details ...	46	0.511239	1.57503	0.0702479	0.401973	0.999	3316	tags=59%, list=25%, signal=78%
REACTOME_PEROXISOMAL_LIPID_METABOLISM	REACTOME_PEROXISOMAL_LIPID_METABOLISM	Details ...	17	0.675819	1.57476	0.0361702	0.397648	0.999	2080	tags=59%, list=16%, signal=70%
MAYBURD_RESPONSE_TO_L663536_DN	MAYBURD_RESPONSE_TO_L663536_DN	Details ...	44	0.546851	1.56948	0.0378486	0.410611	0.999	2859	tags=48%, list=22%, signal=61%
REACTOME_TRANS_GOLGI_NETWORK_VESICLE_BUDDING	REACTOME_TRANS_GOLGI_NETWORK_VESICLE_BUDDING	Details ...	50	0.501111	1.56657	0.0326296	0.415924	0.999	2737	tags=42%, list=21%, signal=53%
ROME_INSULIN_TARGETS_IN_MUSCLE_UP	ROME_INSULIN_TARGETS_IN_MUSCLE_UP	Details ...	339	0.381259	1.56536	0.0161943	0.415488	0.999	2586	tags=32%, list=20%, signal=39%
LEE_LIVER_CANCER_E2F1_DN	LEE_LIVER_CANCER_E2F1_DN	Details ...	58	0.648811	1.56369	0.035503	0.416349	0.999	2290	tags=59%, list=18%, signal=71%
WANG_CLASSIC_ADIPOGENIC_TARGETS_OF_PPARG	WANG_CLASSIC_ADIPOGENIC_TARGETS_OF_PPARG	Details ...	22	0.677387	1.56284	0.0219124	0.414384	0.999	2661	tags=73%, list=20%, signal=91%
REACTOME_ABC_FAMILY_PROTEINS_MEDIATED_TRANSPORT	REACTOME_ABC_FAMILY_PROTEINS_MEDIATED_TRANSPORT	Details ...	27	0.605059	1.56179	0.024	0.41315	0.999	2184	tags=44%, list=17%, signal=53%
BOYAULT_LIVER_CANCER_SUBCLASS_G1_DN	BOYAULT_LIVER_CANCER_SUBCLASS_G1_DN	Details ...	38	0.75728	1.55914	0.0308008	0.416944	0.999	1681	tags=63%, list=13%, signal=72%
LEE_LIVER_CANCER_DENA_DN	LEE_LIVER_CANCER_DENA_DN	Details ...	72	0.702738	1.55623	0.0391753	0.42226	0.999	2018	tags=61%, list=15%, signal=72%
MOOTHA_GLUCONEOGENESIS	MOOTHA_GLUCONEOGENESIS	Details ...	32	0.633587	1.55584	0.0271845	0.418767	0.999	1871	tags=47%, list=14%, signal=55%
MOOTHA_GLYCOGEN_METABOLISM	MOOTHA_GLYCOGEN_METABOLISM	Details ...	20	0.629207	1.55503	0.0384615	0.416989	0.999	1043	tags=40%, list=8%, signal=43%
KEGG_GLYCINE_SERINE_AND_THREONINE_METABOLISM	KEGG_GLYCINE_SERINE_AND_THREONINE_METABOLISM	Details ...	27	0.759762	1.55398	0.034	0.416121	1	1745	tags=70%, list=13%, signal=81%
KEGG_DRUG_METABOLISM_OTHER_ENZYMES	KEGG_DRUG_METABOLISM_OTHER_ENZYMES	Details ...	38	0.701766	1.55369	0.0199601	0.412614	1	2366	tags=61%, list=18%, signal=74%
KEGG_LYSINE_DEGRADATION	KEGG_LYSINE_DEGRADATION	Details ...	39	0.559743	1.55351	0.048	0.408785	1	1091	tags=33%, list=8%, signal=36%
YAMASHITA_LIVER_CANCER_STEM_CELL_DN	YAMASHITA_LIVER_CANCER_STEM_CELL_DN	Details ...	71	0.722025	1.55153	0.028169	0.410623	1	1420	tags=59%, list=11%, signal=66%
SARTIPY_BLUNTED_BY_INSULIN_RESISTANCE_DN	SARTIPY_BLUNTED_BY_INSULIN_RESISTANCE_DN	Details ...	16	0.610482	1.54788	0.0242915	0.418094	1	2539	tags=69%, list=19%, signal=85%
KEGG_HUNTINGTONS_DISEASE	KEGG_HUNTINGTONS_DISEASE	Details ...	151	0.331274	1.54697	0.056962	0.416765	1	3720	tags=46%, list=29%, signal=64%
REACTOME_APC_C_CDH1_MEDIATED_DEGRADATION_OF_CDC20_AND_OTHER_APC_C_CDH1_TARGETED_PROTEINS_IN_LATE_MITOSIS_EARLY_G1	REACTOME_APC_C_CDH1_MEDIATED_DEGRADATION_OF_CDC20_AND_OTHER_APC_C_CDH1_TARGETED_PROTEINS_IN_LATE_MITOSIS_EARLY_G1	Details ...	58	0.485182	1.54614	0.0787879	0.414731	1	3316	tags=50%, list=25%, signal=67%
ELVIDGE_HYPOXIA_DN	ELVIDGE_HYPOXIA_DN	Details ...	136	0.477323	1.54555	0.0335306	0.412277	1	2705	tags=39%, list=21%, signal=49%
KEEN_RESPONSE_TO_ROSIGLITAZONE_UP	KEEN_RESPONSE_TO_ROSIGLITAZONE_UP	Details ...	28	0.496326	1.54394	0.0493097	0.413772	1	2833	tags=61%, list=22%, signal=77%
MOOTHA_PGC	MOOTHA_PGC	Details ...	397	0.399137	1.54322	0.0163599	0.411691	1	2952	tags=41%, list=23%, signal=51%
REACTOME_MEMBRANE_TRAFFICKING	REACTOME_MEMBRANE_TRAFFICKING	Details ...	102	0.42007	1.54216	0.0329457	0.410787	1	3171	tags=41%, list=24%, signal=54%
HSIAO_LIVER_SPECIFIC_GENES	HSIAO_LIVER_SPECIFIC_GENES	Details ...	233	0.716831	1.53521	0.0661479	0.429713	1	2068	tags=67%, list=16%, signal=78%
OHGUCHI_LIVER_HNF4A_TARGETS_DN	OHGUCHI_LIVER_HNF4A_TARGETS_DN	Details ...	105	0.700093	1.53478	0.034413	0.426775	1	1979	tags=64%, list=15%, signal=75%
LEE_LIVER_CANCER_MYC_E2F1_DN	LEE_LIVER_CANCER_MYC_E2F1_DN	Details ...	59	0.693267	1.53403	0.040568	0.42507	1	2042	tags=59%, list=16%, signal=70%
KEGG_PORPHYRIN_AND_CHLOROPHYLL_METABOLISM	KEGG_PORPHYRIN_AND_CHLOROPHYLL_METABOLISM	Details ...	29	0.655794	1.53243	0.0397614	0.426059	1	2340	tags=59%, list=18%, signal=71%
KEGG_FATTY_ACID_METABOLISM	KEGG_FATTY_ACID_METABOLISM	Details ...	35	0.725375	1.5324	0.0512295	0.421992	1	1411	tags=60%, list=11%, signal=67%
LANDIS_ERBB2_BREAST_PRENEOPLASTIC_DN	LANDIS_ERBB2_BREAST_PRENEOPLASTIC_DN	Details ...	48	0.544992	1.53085	0.034	0.42329	1	2634	tags=54%, list=20%, signal=68%
REACTOME_BIOLOGICAL_OXIDATIONS	REACTOME_BIOLOGICAL_OXIDATIONS	Details ...	112	0.611544	1.53063	0.0546559	0.419976	1	2344	tags=54%, list=18%, signal=66%
CHIANG_LIVER_CANCER_SUBCLASS_PROLIFERATION_DN	CHIANG_LIVER_CANCER_SUBCLASS_PROLIFERATION_DN	Details ...	148	0.833731	1.52956	0.035343	0.419409	1	1356	tags=77%, list=10%, signal=85%
KEGG_GLYCOLYSIS_GLUCONEOGENESIS	KEGG_GLYCOLYSIS_GLUCONEOGENESIS	Details ...	54	0.556142	1.52925	0.0329218	0.416452	1	1330	tags=35%, list=10%, signal=39%
LEE_LIVER_CANCER_CIPROFIBRATE_DN	LEE_LIVER_CANCER_CIPROFIBRATE_DN	Details ...	63	0.661406	1.52581	0.0422535	0.423685	1	2018	tags=59%, list=15%, signal=69%
SU_LIVER	SU_LIVER	Details ...	55	0.814303	1.52146	0.0281125	0.434163	1	1588	tags=76%, list=12%, signal=87%
LEE_LIVER_CANCER	LEE_LIVER_CANCER	Details ...	37	0.747651	1.51954	0.0581162	0.436422	1	1099	tags=57%, list=8%, signal=62%
GOLDRATH_HOMEOSTATIC_PROLIFERATION	GOLDRATH_HOMEOSTATIC_PROLIFERATION	Details ...	133	0.425469	1.51598	0.0182556	0.444163	1	1961	tags=33%, list=15%, signal=39%
RODWELL_AGING_KIDNEY_NO_BLOOD_DN	RODWELL_AGING_KIDNEY_NO_BLOOD_DN	Details ...	122	0.428951	1.51441	0.03	0.445679	1	2800	tags=43%, list=21%, signal=55%
KEGG_DRUG_METABOLISM_CYTOCHROME_P450	KEGG_DRUG_METABOLISM_CYTOCHROME_P450	Details ...	57	0.6731	1.51426	0.0474227	0.442229	1	2344	tags=65%, list=18%, signal=79%
SERVITJA_ISLET_HNF1A_TARGETS_DN	SERVITJA_ISLET_HNF1A_TARGETS_DN	Details ...	78	0.5293	1.51409	0.0378486	0.438886	1	1749	tags=35%, list=13%, signal=40%
WONG_PROTEASOME_GENE_MODULE	WONG_PROTEASOME_GENE_MODULE	Details ...	42	0.507174	1.51185	0.0755102	0.44273	1	3730	tags=62%, list=29%, signal=86%
PELLICCIOTTA_HDAC_IN_ANTIGEN_PRESENTATION_UP	PELLICCIOTTA_HDAC_IN_ANTIGEN_PRESENTATION_UP	Details ...	54	0.446105	1.51113	0.0834952	0.441331	1	3753	tags=54%, list=29%, signal=75%
LEE_LIVER_CANCER_ACOX1_DN	LEE_LIVER_CANCER_ACOX1_DN	Details ...	62	0.670482	1.50997	0.0628803	0.441325	1	1994	tags=58%, list=15%, signal=68%
KEGG_HISTIDINE_METABOLISM	KEGG_HISTIDINE_METABOLISM	Details ...	24	0.573582	1.50902	0.042	0.441055	1	2043	tags=46%, list=16%, signal=54%
KEGG_METABOLISM_OF_XENOBIOTICS_BY_CYTOCHROME_P450	KEGG_METABOLISM_OF_XENOBIOTICS_BY_CYTOCHROME_P450	Details ...	53	0.664547	1.509	0.0470348	0.437418	1	2344	tags=64%, list=18%, signal=78%
SESTO_RESPONSE_TO_UV_C0	SESTO_RESPONSE_TO_UV_C0	Details ...	102	0.452321	1.506	0.0433884	0.443415	1	3452	tags=53%, list=26%, signal=71%
SUMI_HNF4A_TARGETS	SUMI_HNF4A_TARGETS	Details ...	21	0.732027	1.50515	0.0375235	0.442482	1	757	tags=43%, list=6%, signal=45%
FERREIRA_EWINGS_SARCOMA_UNSTABLE_VS_STABLE_DN	FERREIRA_EWINGS_SARCOMA_UNSTABLE_VS_STABLE_DN	Details ...	73	0.442967	1.50499	0.0243902	0.439397	1	2230	tags=30%, list=17%, signal=36%
KEGG_ALANINE_ASPARTATE_AND_GLUTAMATE_METABOLISM	KEGG_ALANINE_ASPARTATE_AND_GLUTAMATE_METABOLISM	Details ...	27	0.617395	1.50255	0.0476191	0.443713	1	1542	tags=56%, list=12%, signal=63%
UDAYAKUMAR_MED1_TARGETS_UP	UDAYAKUMAR_MED1_TARGETS_UP	Details ...	123	0.430909	1.50005	0.0266393	0.448351	1	1938	tags=31%, list=15%, signal=36%
REACTOME_MITOCHONDRIAL_PROTEIN_IMPORT	REACTOME_MITOCHONDRIAL_PROTEIN_IMPORT	Details ...	43	0.433847	1.49839	0.0788955	0.450305	1	3178	tags=47%, list=24%, signal=61%
KEGG_PROTEIN_EXPORT	KEGG_PROTEIN_EXPORT	Details ...	18	0.54107	1.49705	0.0998043	0.451309	1	5030	tags=72%, list=39%, signal=117%
KAAB_HEART_ATRIUM_VS_VENTRICLE_DN	KAAB_HEART_ATRIUM_VS_VENTRICLE_DN	Details ...	244	0.388898	1.49532	0.0202429	0.453679	1	2860	tags=41%, list=22%, signal=51%
WONG_IFNA2_RESISTANCE_DN	WONG_IFNA2_RESISTANCE_DN	Details ...	28	0.464106	1.49456	0.0384615	0.452672	1	2209	tags=36%, list=17%, signal=43%
REACTOME_PTM_GAMMA_CARBOXYLATION_HYPUSINE_FORMATION_AND_ARYLSULFATASE_ACTIVATION	REACTOME_PTM_GAMMA_CARBOXYLATION_HYPUSINE_FORMATION_AND_ARYLSULFATASE_ACTIVATION	Details ...	20	0.642702	1.4941	0.0514851	0.450683	1	1851	tags=70%, list=14%, signal=81%
KEGG_BUTANOATE_METABOLISM	KEGG_BUTANOATE_METABOLISM	Details ...	31	0.630668	1.49091	0.0705394	0.457928	1	3119	tags=65%, list=24%, signal=85%
PARK_HSC_VS_MULTIPOTENT_PROGENITORS_UP	PARK_HSC_VS_MULTIPOTENT_PROGENITORS_UP	Details ...	16	0.537607	1.49019	0.0612648	0.45684	1	2560	tags=50%, list=20%, signal=62%
ZWANG_EGF_PERSISTENTLY_UP	ZWANG_EGF_PERSISTENTLY_UP	Details ...	22	0.5885	1.49005	0.0532787	0.453879	1	2363	tags=50%, list=18%, signal=61%
FOURNIER_ACINAR_DEVELOPMENT_EARLY_UP	FOURNIER_ACINAR_DEVELOPMENT_EARLY_UP	Details ...	16	0.662322	1.48728	0.0534979	0.459941	1	1041	tags=31%, list=8%, signal=34%
REACTOME_TRANSPORT_TO_THE_GOLGI_AND_SUBSEQUENT_MODIFICATION	REACTOME_TRANSPORT_TO_THE_GOLGI_AND_SUBSEQUENT_MODIFICATION	Details ...	32	0.491919	1.48363	0.0500928	0.468408	1	2095	tags=41%, list=16%, signal=48%
CUI_GLUCOSE_DEPRIVATION	CUI_GLUCOSE_DEPRIVATION	Details ...	54	0.507388	1.48274	0.0366089	0.468021	1	2544	tags=44%, list=20%, signal=55%
VECCHI_GASTRIC_CANCER_ADVANCED_VS_EARLY_DN	VECCHI_GASTRIC_CANCER_ADVANCED_VS_EARLY_DN	Details ...	87	0.547407	1.48264	0.0262097	0.464973	1	699	tags=25%, list=5%, signal=27%
KEGG_SELENOAMINO_ACID_METABOLISM	KEGG_SELENOAMINO_ACID_METABOLISM	Details ...	20	0.583614	1.48005	0.0654397	0.470027	1	2305	tags=55%, list=18%, signal=67%
BOYAULT_LIVER_CANCER_SUBCLASS_G123_DN	BOYAULT_LIVER_CANCER_SUBCLASS_G123_DN	Details ...	49	0.779905	1.47836	0.0818363	0.472404	1	2041	tags=80%, list=16%, signal=94%
KEGG_AMINO_SUGAR_AND_NUCLEOTIDE_SUGAR_METABOLISM	KEGG_AMINO_SUGAR_AND_NUCLEOTIDE_SUGAR_METABOLISM	Details ...	39	0.511083	1.47702	0.050813	0.473992	1	1546	tags=38%, list=12%, signal=44%
CAIRO_HEPATOBLASTOMA_DN	CAIRO_HEPATOBLASTOMA_DN	Details ...	253	0.716313	1.47382	0.0666667	0.481251	1	2095	tags=65%, list=16%, signal=76%
REACTOME_METABOLISM_OF_NUCLEOTIDES	REACTOME_METABOLISM_OF_NUCLEOTIDES	Details ...	58	0.493856	1.47305	0.040856	0.480679	1	2442	tags=34%, list=19%, signal=42%
KEGG_TYROSINE_METABOLISM	KEGG_TYROSINE_METABOLISM	Details ...	38	0.588964	1.47238	0.0795918	0.479521	1	2133	tags=47%, list=16%, signal=56%
KEGG_RETINOL_METABOLISM	KEGG_RETINOL_METABOLISM	Details ...	46	0.67224	1.47235	0.060241	0.476235	1	2340	tags=70%, list=18%, signal=84%
PIONTEK_PKD1_TARGETS_UP	PIONTEK_PKD1_TARGETS_UP	Details ...	28	0.67985	1.47138	0.0340426	0.475969	1	1658	tags=61%, list=13%, signal=69%
REACTOME_METABOLISM_OF_LIPIDS_AND_LIPOPROTEINS	REACTOME_METABOLISM_OF_LIPIDS_AND_LIPOPROTEINS	Details ...	356	0.430059	1.46912	0.0378486	0.480125	1	2094	tags=33%, list=16%, signal=38%
REACTOME_GLUCONEOGENESIS	REACTOME_GLUCONEOGENESIS	Details ...	31	0.587358	1.46896	0.0629921	0.47735	1	2060	tags=48%, list=16%, signal=57%
KEGG_BETA_ALANINE_METABOLISM	KEGG_BETA_ALANINE_METABOLISM	Details ...	21	0.622963	1.46729	0.0891473	0.479777	1	1295	tags=48%, list=10%, signal=53%
UEDA_PERIFERAL_CLOCK	UEDA_PERIFERAL_CLOCK	Details ...	127	0.451299	1.4668	0.0384615	0.478146	1	3081	tags=42%, list=24%, signal=54%
REACTOME_GLUCOSE_METABOLISM	REACTOME_GLUCOSE_METABOLISM	Details ...	63	0.50146	1.46652	0.0535714	0.475909	1	2060	tags=38%, list=16%, signal=45%
REACTOME_SCFSKP2_MEDIATED_DEGRADATION_OF_P27_P21	REACTOME_SCFSKP2_MEDIATED_DEGRADATION_OF_P27_P21	Details ...	52	0.475295	1.46642	0.109312	0.47305	1	3602	tags=56%, list=28%, signal=77%
RODWELL_AGING_KIDNEY_DN	RODWELL_AGING_KIDNEY_DN	Details ...	114	0.409054	1.46599	0.0364372	0.471257	1	2952	tags=42%, list=23%, signal=54%
YANG_MUC2_TARGETS_DUODENUM_3MO_DN	YANG_MUC2_TARGETS_DUODENUM_3MO_DN	Details ...	21	0.698847	1.46455	0.0567951	0.472864	1	3014	tags=76%, list=23%, signal=99%
REACTOME_GLUTATHIONE_CONJUGATION	REACTOME_GLUTATHIONE_CONJUGATION	Details ...	16	0.620996	1.46306	0.072549	0.474521	1	3046	tags=75%, list=23%, signal=98%
REACTOME_SPHINGOLIPID_METABOLISM	REACTOME_SPHINGOLIPID_METABOLISM	Details ...	43	0.444122	1.46161	0.0498084	0.476051	1	1851	tags=37%, list=14%, signal=43%
KEGG_PPAR_SIGNALING_PATHWAY	KEGG_PPAR_SIGNALING_PATHWAY	Details ...	60	0.561318	1.45909	0.0606061	0.481167	1	2206	tags=48%, list=17%, signal=58%
GROSS_HYPOXIA_VIA_HIF1A_UP	GROSS_HYPOXIA_VIA_HIF1A_UP	Details ...	62	0.473595	1.4589	0.0506073	0.478629	1	1527	tags=31%, list=12%, signal=35%
REACTOME_METABOLISM_OF_PROTEINS	REACTOME_METABOLISM_OF_PROTEINS	Details ...	341	0.322022	1.45762	0.0590631	0.479662	1	2118	tags=25%, list=16%, signal=29%
REACTOME_CYCLIN_E_ASSOCIATED_EVENTS_DURING_G1_S_TRANSITION_	REACTOME_CYCLIN_E_ASSOCIATED_EVENTS_DURING_G1_S_TRANSITION_	Details ...	61	0.438328	1.45448	0.105477	0.486801	1	2961	tags=46%, list=23%, signal=59%
NADLER_OBESITY_DN	NADLER_OBESITY_DN	Details ...	45	0.462401	1.45424	0.0784708	0.484595	1	3214	tags=51%, list=25%, signal=68%
REACTOME_ASPARAGINE_N_LINKED_GLYCOSYLATION	REACTOME_ASPARAGINE_N_LINKED_GLYCOSYLATION	Details ...	66	0.456106	1.45329	0.0785855	0.484652	1	2095	tags=36%, list=16%, signal=43%
YOSHIOKA_LIVER_CANCER_EARLY_RECURRENCE_DN	YOSHIOKA_LIVER_CANCER_EARLY_RECURRENCE_DN	Details ...	46	0.424373	1.45222	0.0303644	0.48519	1	2498	tags=33%, list=19%, signal=40%
RUAN_RESPONSE_TO_TNF_DN	RUAN_RESPONSE_TO_TNF_DN	Details ...	78	0.516289	1.45052	0.0645161	0.487675	1	1968	tags=46%, list=15%, signal=54%
BONOME_OVARIAN_CANCER_POOR_SURVIVAL_UP	BONOME_OVARIAN_CANCER_POOR_SURVIVAL_UP	Details ...	27	0.54424	1.44723	0.0696325	0.495853	1	1118	tags=33%, list=9%, signal=36%
KEGG_STARCH_AND_SUCROSE_METABOLISM	KEGG_STARCH_AND_SUCROSE_METABOLISM	Details ...	36	0.612959	1.44375	0.0633947	0.504691	1	2076	tags=56%, list=16%, signal=66%
LEE_LIVER_CANCER_MYC_TGFA_DN	LEE_LIVER_CANCER_MYC_TGFA_DN	Details ...	61	0.645364	1.44319	0.0843373	0.503551	1	2128	tags=62%, list=16%, signal=74%
WELCSH_BRCA1_TARGETS_UP	WELCSH_BRCA1_TARGETS_UP	Details ...	180	0.436883	1.44235	0.0438247	0.503454	1	2794	tags=44%, list=21%, signal=55%
REACTOME_FATTY_ACID_TRIACYLGLYCEROL_AND_KETONE_BODY_METABOLISM	REACTOME_FATTY_ACID_TRIACYLGLYCEROL_AND_KETONE_BODY_METABOLISM	Details ...	123	0.487961	1.4408	0.0445344	0.505395	1	2462	tags=44%, list=19%, signal=54%
AMIT_SERUM_RESPONSE_20_MCF10A	AMIT_SERUM_RESPONSE_20_MCF10A	Details ...	20	0.501788	1.4401	0.0847784	0.504833	1	2668	tags=45%, list=20%, signal=56%
LI_DCP2_BOUND_MRNA	LI_DCP2_BOUND_MRNA	Details ...	80	0.430796	1.43916	0.0671937	0.50481	1	3582	tags=54%, list=27%, signal=74%
REACTOME_APC_C_CDC20_MEDIATED_DEGRADATION_OF_MITOTIC_PROTEINS	REACTOME_APC_C_CDC20_MEDIATED_DEGRADATION_OF_MITOTIC_PROTEINS	Details ...	58	0.486069	1.43863	0.14741	0.503766	1	3316	tags=50%, list=25%, signal=67%
WENG_POR_DOSAGE	WENG_POR_DOSAGE	Details ...	18	0.647392	1.4378	0.0606061	0.503373	1	719	tags=39%, list=6%, signal=41%
WAKABAYASHI_ADIPOGENESIS_PPARG_BOUND_36HR	WAKABAYASHI_ADIPOGENESIS_PPARG_BOUND_36HR	Details ...	22	0.478768	1.43389	0.0769231	0.513626	1	3449	tags=64%, list=26%, signal=86%
KAYO_AGING_MUSCLE_DN	KAYO_AGING_MUSCLE_DN	Details ...	117	0.345906	1.4287	0.0257426	0.528061	1	3399	tags=36%, list=26%, signal=48%
HOUSTIS_ROS	HOUSTIS_ROS	Details ...	34	0.583956	1.42825	0.0847784	0.526485	1	2535	tags=59%, list=19%, signal=73%
RAMALHO_STEMNESS_UP	RAMALHO_STEMNESS_UP	Details ...	164	0.415983	1.42795	0.0622568	0.524488	1	2490	tags=34%, list=19%, signal=42%
CHIANG_LIVER_CANCER_SUBCLASS_UNANNOTATED_DN	CHIANG_LIVER_CANCER_SUBCLASS_UNANNOTATED_DN	Details ...	148	0.520288	1.42647	0.136905	0.52645	1	2526	tags=48%, list=19%, signal=59%
YANG_MUC2_TARGETS_DUODENUM_6MO_DN	YANG_MUC2_TARGETS_DUODENUM_6MO_DN	Details ...	19	0.667193	1.42379	0.0616016	0.532422	1	2796	tags=74%, list=21%, signal=94%
REACTOME_CYTOCHROME_P450_ARRANGED_BY_SUBSTRATE_TYPE	REACTOME_CYTOCHROME_P450_ARRANGED_BY_SUBSTRATE_TYPE	Details ...	47	0.606442	1.41938	0.0828157	0.544152	1	702	tags=34%, list=5%, signal=36%
BIOCARTA_BIOPEPTIDES_PATHWAY	BIOCARTA_BIOPEPTIDES_PATHWAY	Details ...	41	0.390061	1.41507	0.0861057	0.555948	1	2396	tags=32%, list=18%, signal=39%
GRUETZMANN_PANCREATIC_CANCER_DN	GRUETZMANN_PANCREATIC_CANCER_DN	Details ...	189	0.400846	1.41436	0.0386847	0.555354	1	2867	tags=38%, list=22%, signal=48%
REACTOME_SIGNALING_BY_THE_B_CELL_RECEPTOR_BCR	REACTOME_SIGNALING_BY_THE_B_CELL_RECEPTOR_BCR	Details ...	105	0.362532	1.41335	0.109344	0.555732	1	2827	tags=35%, list=22%, signal=45%
ACEVEDO_LIVER_CANCER_DN	ACEVEDO_LIVER_CANCER_DN	Details ...	410	0.492278	1.41282	0.0972763	0.554299	1	2907	tags=46%, list=22%, signal=57%
REACTOME_BILE_ACID_AND_BILE_SALT_METABOLISM	REACTOME_BILE_ACID_AND_BILE_SALT_METABOLISM	Details ...	25	0.703943	1.41191	0.118712	0.554276	1	454	tags=44%, list=3%, signal=46%
REACTOME_SYNTHESIS_OF_BILE_ACIDS_AND_BILE_SALTS	REACTOME_SYNTHESIS_OF_BILE_ACIDS_AND_BILE_SALTS	Details ...	17	0.766131	1.41163	0.0910973	0.552121	1	1647	tags=71%, list=13%, signal=81%
KEGG_PENTOSE_AND_GLUCURONATE_INTERCONVERSIONS	KEGG_PENTOSE_AND_GLUCURONATE_INTERCONVERSIONS	Details ...	18	0.692973	1.41115	0.119284	0.550715	1	1215	tags=56%, list=9%, signal=61%
WENG_POR_TARGETS_LIVER_UP	WENG_POR_TARGETS_LIVER_UP	Details ...	35	0.570831	1.41081	0.0547667	0.548925	1	1658	tags=43%, list=13%, signal=49%
ICHIBA_GRAFT_VERSUS_HOST_DISEASE_D7_DN	ICHIBA_GRAFT_VERSUS_HOST_DISEASE_D7_DN	Details ...	34	0.593224	1.40884	0.0947776	0.552966	1	1416	tags=41%, list=11%, signal=46%
REACTOME_GOLGI_ASSOCIATED_VESICLE_BIOGENESIS	REACTOME_GOLGI_ASSOCIATED_VESICLE_BIOGENESIS	Details ...	43	0.439432	1.40193	0.0817121	0.574129	1	3628	tags=47%, list=28%, signal=64%
DAZARD_RESPONSE_TO_UV_SCC_UP	DAZARD_RESPONSE_TO_UV_SCC_UP	Details ...	113	0.433429	1.3998	0.0691057	0.578288	1	2758	tags=46%, list=21%, signal=58%
BLALOCK_ALZHEIMERS_DISEASE_INCIPIENT_DN	BLALOCK_ALZHEIMERS_DISEASE_INCIPIENT_DN	Details ...	158	0.357255	1.39821	0.0684932	0.581105	1	2647	tags=30%, list=20%, signal=37%
ZAMORA_NOS2_TARGETS_DN	ZAMORA_NOS2_TARGETS_DN	Details ...	89	0.410176	1.39754	0.0714286	0.580532	1	3167	tags=39%, list=24%, signal=52%
IIZUKA_LIVER_CANCER_PROGRESSION_G2_G3_UP	IIZUKA_LIVER_CANCER_PROGRESSION_G2_G3_UP	Details ...	24	0.600089	1.39647	0.136634	0.581118	1	1283	tags=38%, list=10%, signal=42%
ACEVEDO_NORMAL_TISSUE_ADJACENT_TO_LIVER_TUMOR_UP	ACEVEDO_NORMAL_TISSUE_ADJACENT_TO_LIVER_TUMOR_UP	Details ...	132	0.422183	1.39593	0.0440882	0.57999	1	2410	tags=36%, list=18%, signal=44%
YIH_RESPONSE_TO_ARSENITE_C1	YIH_RESPONSE_TO_ARSENITE_C1	Details ...	24	0.529237	1.39408	0.0983936	0.583483	1	1637	tags=33%, list=13%, signal=38%
BILBAN_B_CLL_LPL_UP	BILBAN_B_CLL_LPL_UP	Details ...	60	0.437086	1.39349	0.0447471	0.58253	1	1873	tags=30%, list=14%, signal=35%
JAZAG_TGFB1_SIGNALING_DN	JAZAG_TGFB1_SIGNALING_DN	Details ...	30	0.416903	1.39339	0.0764588	0.57994	1	2576	tags=37%, list=20%, signal=46%
ONDER_CDH1_TARGETS_3_UP	ONDER_CDH1_TARGETS_3_UP	Details ...	17	0.647673	1.39134	0.103586	0.584316	1	974	tags=35%, list=7%, signal=38%
DOANE_RESPONSE_TO_ANDROGEN_UP	DOANE_RESPONSE_TO_ANDROGEN_UP	Details ...	168	0.359712	1.38908	0.0222672	0.589656	1	2088	tags=28%, list=16%, signal=33%
REACTOME_CLASS_I_MHC_MEDIATED_ANTIGEN_PROCESSING_PRESENTATION	REACTOME_CLASS_I_MHC_MEDIATED_ANTIGEN_PROCESSING_PRESENTATION	Details ...	189	0.355458	1.38893	0.0989899	0.587183	1	3316	tags=41%, list=25%, signal=55%
NELSON_RESPONSE_TO_ANDROGEN_UP	NELSON_RESPONSE_TO_ANDROGEN_UP	Details ...	79	0.42983	1.38883	0.0389105	0.584565	1	1838	tags=28%, list=14%, signal=32%
WENG_POR_TARGETS_GLOBAL_UP	WENG_POR_TARGETS_GLOBAL_UP	Details ...	17	0.667795	1.38882	0.106776	0.5817	1	1658	tags=59%, list=13%, signal=67%
MIKKELSEN_NPC_LCP_WITH_H3K4ME3	MIKKELSEN_NPC_LCP_WITH_H3K4ME3	Details ...	40	0.462819	1.38773	0.1	0.582743	1	1439	tags=28%, list=11%, signal=31%
RAHMAN_TP53_TARGETS_PHOSPHORYLATED	RAHMAN_TP53_TARGETS_PHOSPHORYLATED	Details ...	18	0.520844	1.38242	0.126953	0.598181	1	4074	tags=72%, list=31%, signal=105%
SCIBETTA_KDM5B_TARGETS_UP	SCIBETTA_KDM5B_TARGETS_UP	Details ...	17	0.483152	1.38112	0.104384	0.599755	1	2942	tags=47%, list=23%, signal=61%
KEGG_ASCORBATE_AND_ALDARATE_METABOLISM	KEGG_ASCORBATE_AND_ALDARATE_METABOLISM	Details ...	16	0.713172	1.38102	0.125498	0.597186	1	2573	tags=69%, list=20%, signal=86%
KEGG_TRYPTOPHAN_METABOLISM	KEGG_TRYPTOPHAN_METABOLISM	Details ...	32	0.622638	1.38094	0.111789	0.594538	1	1176	tags=50%, list=9%, signal=55%
WENG_POR_TARGETS_LIVER_DN	WENG_POR_TARGETS_LIVER_DN	Details ...	18	0.630489	1.38064	0.122093	0.592633	1	2042	tags=39%, list=16%, signal=46%
KEGG_PENTOSE_PHOSPHATE_PATHWAY	KEGG_PENTOSE_PHOSPHATE_PATHWAY	Details ...	24	0.562409	1.3794	0.084507	0.594212	1	1770	tags=42%, list=14%, signal=48%
REACTOME_AMINO_ACID_SYNTHESIS_AND_INTERCONVERSION_TRANSAMINATION	REACTOME_AMINO_ACID_SYNTHESIS_AND_INTERCONVERSION_TRANSAMINATION	Details ...	15	0.643801	1.3793	0.0891089	0.591689	1	1541	tags=60%, list=12%, signal=68%
REACTOME_PHASE1_FUNCTIONALIZATION_OF_COMPOUNDS	REACTOME_PHASE1_FUNCTIONALIZATION_OF_COMPOUNDS	Details ...	62	0.575287	1.3792	0.12731	0.589193	1	1165	tags=37%, list=9%, signal=41%
MOOTHA_GLYCOLYSIS	MOOTHA_GLYCOLYSIS	Details ...	21	0.570643	1.37856	0.0918367	0.58872	1	1513	tags=43%, list=12%, signal=48%
KEGG_GLUTATHIONE_METABOLISM	KEGG_GLUTATHIONE_METABOLISM	Details ...	39	0.543349	1.378	0.0857143	0.588032	1	2432	tags=54%, list=19%, signal=66%
KIM_ALL_DISORDERS_CALB1_CORR_UP	KIM_ALL_DISORDERS_CALB1_CORR_UP	Details ...	498	0.357911	1.37795	0.0764588	0.585435	1	3442	tags=40%, list=26%, signal=53%
BLUM_RESPONSE_TO_SALIRASIB_UP	BLUM_RESPONSE_TO_SALIRASIB_UP	Details ...	231	0.384311	1.37759	0.0764331	0.583903	1	2581	tags=37%, list=20%, signal=46%
MORI_PLASMA_CELL_UP	MORI_PLASMA_CELL_UP	Details ...	33	0.4709	1.37708	0.106	0.58289	1	1823	tags=33%, list=14%, signal=39%
DURCHDEWALD_SKIN_CARCINOGENESIS_UP	DURCHDEWALD_SKIN_CARCINOGENESIS_UP	Details ...	64	0.406956	1.37219	0.06875	0.596872	1	1435	tags=27%, list=11%, signal=30%
SASSON_RESPONSE_TO_FORSKOLIN_UP	SASSON_RESPONSE_TO_FORSKOLIN_UP	Details ...	81	0.430376	1.372	0.0489237	0.59481	1	2540	tags=41%, list=19%, signal=50%
SERVITJA_LIVER_HNF1A_TARGETS_DN	SERVITJA_LIVER_HNF1A_TARGETS_DN	Details ...	128	0.532785	1.37077	0.108949	0.596261	1	2042	tags=44%, list=16%, signal=51%
KEGG_ABC_TRANSPORTERS	KEGG_ABC_TRANSPORTERS	Details ...	36	0.506735	1.36735	0.129412	0.605154	1	747	tags=25%, list=6%, signal=26%
REACTOME_PHOSPHOLIPID_METABOLISM	REACTOME_PHOSPHOLIPID_METABOLISM	Details ...	130	0.342572	1.3658	0.0549242	0.607859	1	1913	tags=28%, list=15%, signal=32%
GUO_TARGETS_OF_IRS1_AND_IRS2	GUO_TARGETS_OF_IRS1_AND_IRS2	Details ...	87	0.45876	1.36572	0.0752475	0.605329	1	2099	tags=37%, list=16%, signal=44%
REACTOME_CHYLOMICRON_MEDIATED_LIPID_TRANSPORT	REACTOME_CHYLOMICRON_MEDIATED_LIPID_TRANSPORT	Details ...	15	0.613667	1.36493	0.144814	0.605538	1	2546	tags=67%, list=20%, signal=83%
YAO_TEMPORAL_RESPONSE_TO_PROGESTERONE_CLUSTER_10	YAO_TEMPORAL_RESPONSE_TO_PROGESTERONE_CLUSTER_10	Details ...	55	0.422404	1.36413	0.127273	0.60547	1	3446	tags=42%, list=26%, signal=57%
CREIGHTON_ENDOCRINE_THERAPY_RESISTANCE_3	CREIGHTON_ENDOCRINE_THERAPY_RESISTANCE_3	Details ...	495	0.365481	1.36217	0.0307377	0.609564	1	2572	tags=32%, list=20%, signal=38%
YOSHIMURA_MAPK8_TARGETS_DN	YOSHIMURA_MAPK8_TARGETS_DN	Details ...	319	0.33326	1.36094	0.0299401	0.610995	1	1668	tags=22%, list=13%, signal=25%
NOUZOVA_TRETINOIN_AND_H4_ACETYLATION	NOUZOVA_TRETINOIN_AND_H4_ACETYLATION	Details ...	92	0.384932	1.35811	0.116959	0.618217	1	2710	tags=39%, list=21%, signal=49%
BHATI_G2M_ARREST_BY_2METHOXYESTRADIOL_DN	BHATI_G2M_ARREST_BY_2METHOXYESTRADIOL_DN	Details ...	91	0.371264	1.35739	0.0437376	0.618016	1	2160	tags=29%, list=17%, signal=34%
VERHAAK_GLIOBLASTOMA_NEURAL	VERHAAK_GLIOBLASTOMA_NEURAL	Details ...	122	0.377789	1.35627	0.0392157	0.619244	1	3210	tags=43%, list=25%, signal=57%
REACTOME_PURINE_METABOLISM	REACTOME_PURINE_METABOLISM	Details ...	27	0.474366	1.35553	0.102041	0.619091	1	2855	tags=37%, list=22%, signal=47%
APPIERTO_RESPONSE_TO_FENRETINIDE_DN	APPIERTO_RESPONSE_TO_FENRETINIDE_DN	Details ...	42	0.348941	1.35519	0.116959	0.617589	1	2482	tags=29%, list=19%, signal=35%
LANDIS_ERBB2_BREAST_TUMORS_65_UP	LANDIS_ERBB2_BREAST_TUMORS_65_UP	Details ...	20	0.560209	1.35482	0.107843	0.616087	1	843	tags=30%, list=6%, signal=32%
GUILLAUMOND_KLF10_TARGETS_DN	GUILLAUMOND_KLF10_TARGETS_DN	Details ...	22	0.575806	1.35371	0.11134	0.617156	1	3119	tags=59%, list=24%, signal=78%
DOANE_BREAST_CANCER_CLASSES_UP	DOANE_BREAST_CANCER_CLASSES_UP	Details ...	65	0.47242	1.3531	0.0861057	0.616533	1	2079	tags=38%, list=16%, signal=46%
WANG_ADIPOGENIC_GENES_REPRESSED_BY_SIRT1	WANG_ADIPOGENIC_GENES_REPRESSED_BY_SIRT1	Details ...	22	0.538991	1.35019	0.0989691	0.623825	1	2441	tags=55%, list=19%, signal=67%
SEIDEN_MET_SIGNALING	SEIDEN_MET_SIGNALING	Details ...	17	0.583691	1.3495	0.148893	0.623619	1	2045	tags=41%, list=16%, signal=49%
GAZDA_DIAMOND_BLACKFAN_ANEMIA_MYELOID_DN	GAZDA_DIAMOND_BLACKFAN_ANEMIA_MYELOID_DN	Details ...	35	0.41258	1.34935	0.0861057	0.621477	1	1296	tags=23%, list=10%, signal=25%
KESHELAVA_MULTIPLE_DRUG_RESISTANCE	KESHELAVA_MULTIPLE_DRUG_RESISTANCE	Details ...	75	0.361201	1.34727	0.0829959	0.625883	1	1640	tags=23%, list=13%, signal=26%
VANLOO_SP3_TARGETS_DN	VANLOO_SP3_TARGETS_DN	Details ...	72	0.440954	1.34673	0.10297	0.625208	1	1395	tags=29%, list=11%, signal=32%
BYSTRYKH_HEMATOPOIESIS_STEM_CELL_AND_BRAIN_QTL_TRANS	BYSTRYKH_HEMATOPOIESIS_STEM_CELL_AND_BRAIN_QTL_TRANS	Details ...	151	0.310162	1.34669	0.0269151	0.622745	1	2849	tags=31%, list=22%, signal=39%
COULOUARN_TEMPORAL_TGFB1_SIGNATURE_DN	COULOUARN_TEMPORAL_TGFB1_SIGNATURE_DN	Details ...	118	0.438661	1.34636	0.112403	0.621315	1	2539	tags=37%, list=19%, signal=46%
REACTOME_PYRUVATE_METABOLISM	REACTOME_PYRUVATE_METABOLISM	Details ...	16	0.561465	1.34564	0.120553	0.62127	1	1230	tags=31%, list=9%, signal=34%
SMITH_LIVER_CANCER	SMITH_LIVER_CANCER	Details ...	40	0.516712	1.34232	0.145492	0.629924	1	2968	tags=55%, list=23%, signal=71%
REACTOME_SYNTHESIS_AND_INTERCONVERSION_OF_NUCLEOTIDE_DI_AND_TRIPHOSPHATES	REACTOME_SYNTHESIS_AND_INTERCONVERSION_OF_NUCLEOTIDE_DI_AND_TRIPHOSPHATES	Details ...	16	0.583852	1.34016	0.164093	0.634743	1	2266	tags=44%, list=17%, signal=53%
WENG_POR_TARGETS_GLOBAL_DN	WENG_POR_TARGETS_GLOBAL_DN	Details ...	22	0.536362	1.33785	0.135294	0.639916	1	2363	tags=41%, list=18%, signal=50%
MCCLUNG_CREB1_TARGETS_DN	MCCLUNG_CREB1_TARGETS_DN	Details ...	46	0.370207	1.3336	0.0770751	0.6523	1	3437	tags=41%, list=26%, signal=56%
AMIT_EGF_RESPONSE_240_MCF10A	AMIT_EGF_RESPONSE_240_MCF10A	Details ...	18	0.566926	1.33263	0.117878	0.653188	1	1417	tags=33%, list=11%, signal=37%
RUAN_RESPONSE_TO_TNF_TROGLITAZONE_DN	RUAN_RESPONSE_TO_TNF_TROGLITAZONE_DN	Details ...	39	0.486114	1.33049	0.125	0.658177	1	1968	tags=46%, list=15%, signal=54%
JI_RESPONSE_TO_FSH_DN	JI_RESPONSE_TO_FSH_DN	Details ...	55	0.501749	1.33004	0.142857	0.657048	1	3009	tags=45%, list=23%, signal=59%
KEGG_GLYCOSAMINOGLYCAN_DEGRADATION	KEGG_GLYCOSAMINOGLYCAN_DEGRADATION	Details ...	21	0.431131	1.32967	0.156	0.655697	1	1703	tags=29%, list=13%, signal=33%
BARIS_THYROID_CANCER_UP	BARIS_THYROID_CANCER_UP	Details ...	22	0.453301	1.32882	0.121756	0.656137	1	3863	tags=59%, list=30%, signal=84%
VARELA_ZMPSTE24_TARGETS_DN	VARELA_ZMPSTE24_TARGETS_DN	Details ...	31	0.610986	1.32857	0.157371	0.654471	1	2352	tags=55%, list=18%, signal=67%
FAELT_B_CLL_WITH_VH_REARRANGEMENTS_DN	FAELT_B_CLL_WITH_VH_REARRANGEMENTS_DN	Details ...	43	0.407308	1.32852	0.095723	0.652052	1	2740	tags=42%, list=21%, signal=53%
CREIGHTON_AKT1_SIGNALING_VIA_MTOR_DN	CREIGHTON_AKT1_SIGNALING_VIA_MTOR_DN	Details ...	22	0.515389	1.32773	0.184615	0.652247	1	4381	tags=68%, list=34%, signal=103%
LEE_LIVER_CANCER_MYC_DN	LEE_LIVER_CANCER_MYC_DN	Details ...	57	0.534199	1.32543	0.139442	0.657678	1	2388	tags=47%, list=18%, signal=58%
BOYAULT_LIVER_CANCER_SUBCLASS_G3_DN	BOYAULT_LIVER_CANCER_SUBCLASS_G3_DN	Details ...	47	0.612301	1.32423	0.193159	0.659092	1	2104	tags=57%, list=16%, signal=68%
IGARASHI_ATF4_TARGETS_DN	IGARASHI_ATF4_TARGETS_DN	Details ...	74	0.422228	1.32292	0.0939335	0.661189	1	2338	tags=36%, list=18%, signal=44%
SHIPP_DLBCL_CURED_VS_FATAL_DN	SHIPP_DLBCL_CURED_VS_FATAL_DN	Details ...	40	0.415579	1.32119	0.0950413	0.664487	1	2990	tags=45%, list=23%, signal=58%
LUI_THYROID_CANCER_CLUSTER_3	LUI_THYROID_CANCER_CLUSTER_3	Details ...	23	0.441198	1.31916	0.194553	0.668901	1	3356	tags=43%, list=26%, signal=58%
KEGG_STEROID_HORMONE_BIOSYNTHESIS	KEGG_STEROID_HORMONE_BIOSYNTHESIS	Details ...	46	0.595229	1.31832	0.168378	0.669484	1	2340	tags=50%, list=18%, signal=61%
CHEOK_RESPONSE_TO_HD_MTX_DN	CHEOK_RESPONSE_TO_HD_MTX_DN	Details ...	21	0.455336	1.31743	0.131687	0.669905	1	2699	tags=38%, list=21%, signal=48%
CHANGOLKAR_H2AFY_TARGETS_DN	CHANGOLKAR_H2AFY_TARGETS_DN	Details ...	30	0.468911	1.3171	0.108434	0.668468	1	1532	tags=33%, list=12%, signal=38%
JAIN_NFKB_SIGNALING	JAIN_NFKB_SIGNALING	Details ...	71	0.357864	1.31685	0.0728347	0.666771	1	2670	tags=30%, list=20%, signal=37%
SAKAI_TUMOR_INFILTRATING_MONOCYTES_DN	SAKAI_TUMOR_INFILTRATING_MONOCYTES_DN	Details ...	73	0.375489	1.31561	0.160612	0.668885	1	2490	tags=36%, list=19%, signal=44%
REACTOME_TRIGLYCERIDE_BIOSYNTHESIS	REACTOME_TRIGLYCERIDE_BIOSYNTHESIS	Details ...	26	0.567622	1.31557	0.14881	0.666474	1	1937	tags=46%, list=15%, signal=54%
ABBUD_LIF_SIGNALING_1_DN	ABBUD_LIF_SIGNALING_1_DN	Details ...	21	0.519216	1.3154	0.120332	0.664582	1	1086	tags=33%, list=8%, signal=36%
FARMER_BREAST_CANCER_APOCRINE_VS_LUMINAL	FARMER_BREAST_CANCER_APOCRINE_VS_LUMINAL	Details ...	296	0.360429	1.3131	0.0353635	0.670157	1	2144	tags=32%, list=16%, signal=37%
DOUGLAS_BMI1_TARGETS_DN	DOUGLAS_BMI1_TARGETS_DN	Details ...	216	0.354577	1.30996	0.0763209	0.678544	1	2999	tags=39%, list=23%, signal=50%
REACTOME_PYRIMIDINE_METABOLISM	REACTOME_PYRIMIDINE_METABOLISM	Details ...	18	0.546502	1.30932	0.134241	0.678207	1	844	tags=28%, list=6%, signal=30%
LI_WILMS_TUMOR_VS_FETAL_KIDNEY_1_UP	LI_WILMS_TUMOR_VS_FETAL_KIDNEY_1_UP	Details ...	174	0.40918	1.30668	0.0957031	0.684717	1	1975	tags=34%, list=15%, signal=40%
WAKABAYASHI_ADIPOGENESIS_PPARG_BOUND_8D	WAKABAYASHI_ADIPOGENESIS_PPARG_BOUND_8D	Details ...	464	0.295853	1.30067	0.0402414	0.70314	1	2029	tags=24%, list=16%, signal=28%
REACTOME_SPHINGOLIPID_DE_NOVO_BIOSYNTHESIS	REACTOME_SPHINGOLIPID_DE_NOVO_BIOSYNTHESIS	Details ...	16	0.490501	1.30052	0.128405	0.701101	1	2245	tags=50%, list=17%, signal=60%
SOTIRIOU_BREAST_CANCER_GRADE_1_VS_3_DN	SOTIRIOU_BREAST_CANCER_GRADE_1_VS_3_DN	Details ...	40	0.442993	1.3001	0.142857	0.700069	1	2242	tags=35%, list=17%, signal=42%
KEGG_NICOTINATE_AND_NICOTINAMIDE_METABOLISM	KEGG_NICOTINATE_AND_NICOTINAMIDE_METABOLISM	Details ...	15	0.545132	1.29726	0.121272	0.707601	1	2611	tags=60%, list=20%, signal=75%
GAZDA_DIAMOND_BLACKFAN_ANEMIA_MYELOID_UP	GAZDA_DIAMOND_BLACKFAN_ANEMIA_MYELOID_UP	Details ...	27	0.477351	1.297	0.138614	0.705973	1	932	tags=26%, list=7%, signal=28%
BYSTRYKH_HEMATOPOIESIS_STEM_CELL_AND_BRAIN_QTL_CIS	BYSTRYKH_HEMATOPOIESIS_STEM_CELL_AND_BRAIN_QTL_CIS	Details ...	40	0.384317	1.29614	0.148515	0.70633	1	3220	tags=52%, list=25%, signal=70%
ABBUD_LIF_SIGNALING_1_UP	ABBUD_LIF_SIGNALING_1_UP	Details ...	42	0.460722	1.29544	0.182365	0.70626	1	1862	tags=31%, list=14%, signal=36%
KEGG_N_GLYCAN_BIOSYNTHESIS	KEGG_N_GLYCAN_BIOSYNTHESIS	Details ...	36	0.44201	1.29185	0.162476	0.7167	1	2561	tags=39%, list=20%, signal=48%
PENG_RAPAMYCIN_RESPONSE_DN	PENG_RAPAMYCIN_RESPONSE_DN	Details ...	224	0.370574	1.29166	0.166998	0.714804	1	3866	tags=50%, list=30%, signal=70%
PRAMOONJAGO_SOX4_TARGETS_DN	PRAMOONJAGO_SOX4_TARGETS_DN	Details ...	46	0.462411	1.29089	0.139623	0.715027	1	1270	tags=26%, list=10%, signal=29%
GAZDA_DIAMOND_BLACKFAN_ANEMIA_PROGENITOR_DN	GAZDA_DIAMOND_BLACKFAN_ANEMIA_PROGENITOR_DN	Details ...	56	0.388632	1.29081	0.096	0.712805	1	2598	tags=38%, list=20%, signal=47%
OHGUCHI_LIVER_HNF4A_TARGETS_UP	OHGUCHI_LIVER_HNF4A_TARGETS_UP	Details ...	34	0.534437	1.29044	0.108055	0.711546	1	889	tags=29%, list=7%, signal=31%
MARTINEZ_RESPONSE_TO_TRABECTEDIN	MARTINEZ_RESPONSE_TO_TRABECTEDIN	Details ...	46	0.392725	1.28976	0.0994036	0.711495	1	3077	tags=43%, list=24%, signal=57%
IVANOVA_HEMATOPOIESIS_INTERMEDIATE_PROGENITOR	IVANOVA_HEMATOPOIESIS_INTERMEDIATE_PROGENITOR	Details ...	97	0.340339	1.28766	0.140756	0.716315	1	2758	tags=28%, list=21%, signal=35%
SMID_BREAST_CANCER_LUMINAL_B_UP	SMID_BREAST_CANCER_LUMINAL_B_UP	Details ...	154	0.391636	1.28461	0.0688935	0.724464	1	1163	tags=21%, list=9%, signal=23%
REACTOME_TRANSPORT_OF_GLUCOSE_AND_OTHER_SUGARS_BILE_SALTS_AND_ORGANIC_ACIDS_METAL_IONS_AND_AMINE_COMPOUNDS	REACTOME_TRANSPORT_OF_GLUCOSE_AND_OTHER_SUGARS_BILE_SALTS_AND_ORGANIC_ACIDS_METAL_IONS_AND_AMINE_COMPOUNDS	Details ...	62	0.418161	1.28368	0.152866	0.725382	1	834	tags=19%, list=6%, signal=21%
BIOCARTA_INTRINSIC_PATHWAY	BIOCARTA_INTRINSIC_PATHWAY	Details ...	23	0.599146	1.28346	0.207692	0.723698	1	1896	tags=57%, list=15%, signal=66%
LIU_CMYB_TARGETS_UP	LIU_CMYB_TARGETS_UP	Details ...	147	0.362107	1.28325	0.0419048	0.721876	1	2286	tags=32%, list=18%, signal=38%
CHYLA_CBFA2T3_TARGETS_DN	CHYLA_CBFA2T3_TARGETS_DN	Details ...	154	0.337724	1.28088	0.0398406	0.727788	1	1905	tags=25%, list=15%, signal=29%
CHIANG_LIVER_CANCER_SUBCLASS_UNANNOTATED_UP	CHIANG_LIVER_CANCER_SUBCLASS_UNANNOTATED_UP	Details ...	61	0.542292	1.27898	0.184	0.731804	1	1577	tags=36%, list=12%, signal=41%
BIOCARTA_NTHI_PATHWAY	BIOCARTA_NTHI_PATHWAY	Details ...	24	0.411498	1.27766	0.178862	0.733986	1	2739	tags=42%, list=21%, signal=53%
REACTOME_STEROID_HORMONES	REACTOME_STEROID_HORMONES	Details ...	26	0.500997	1.27706	0.150713	0.733607	1	702	tags=19%, list=5%, signal=20%
WANG_LMO4_TARGETS_DN	WANG_LMO4_TARGETS_DN	Details ...	221	0.306513	1.27642	0.120833	0.733446	1	2679	tags=32%, list=21%, signal=39%
ZHONG_SECRETOME_OF_LUNG_CANCER_AND_MACROPHAGE	ZHONG_SECRETOME_OF_LUNG_CANCER_AND_MACROPHAGE	Details ...	73	0.389348	1.27542	0.137996	0.734498	1	3075	tags=42%, list=24%, signal=55%
URS_ADIPOCYTE_DIFFERENTIATION_UP	URS_ADIPOCYTE_DIFFERENTIATION_UP	Details ...	65	0.403748	1.27514	0.108696	0.732951	1	2527	tags=37%, list=19%, signal=46%
YAO_TEMPORAL_RESPONSE_TO_PROGESTERONE_CLUSTER_7	YAO_TEMPORAL_RESPONSE_TO_PROGESTERONE_CLUSTER_7	Details ...	58	0.378557	1.27432	0.136634	0.733177	1	1286	tags=22%, list=10%, signal=25%
WELCH_GATA1_TARGETS	WELCH_GATA1_TARGETS	Details ...	18	0.435044	1.27223	0.204365	0.738125	1	2916	tags=33%, list=22%, signal=43%
WOTTON_RUNX_TARGETS_DN	WOTTON_RUNX_TARGETS_DN	Details ...	24	0.456157	1.27204	0.135081	0.736316	1	465	tags=21%, list=4%, signal=22%
REACTOME_N_GLYCAN_ANTENNAE_ELONGATION_IN_THE_MEDIAL_TRANS_GOLGI	REACTOME_N_GLYCAN_ANTENNAE_ELONGATION_IN_THE_MEDIAL_TRANS_GOLGI	Details ...	17	0.458286	1.27145	0.144177	0.736059	1	564	tags=24%, list=4%, signal=25%
SASSON_RESPONSE_TO_GONADOTROPHINS_UP	SASSON_RESPONSE_TO_GONADOTROPHINS_UP	Details ...	82	0.393187	1.27107	0.10495	0.734873	1	2540	tags=37%, list=19%, signal=45%
GARGALOVIC_RESPONSE_TO_OXIDIZED_PHOSPHOLIPIDS_YELLOW_UP	GARGALOVIC_RESPONSE_TO_OXIDIZED_PHOSPHOLIPIDS_YELLOW_UP	Details ...	24	0.455647	1.26703	0.200382	0.747117	1	1621	tags=29%, list=12%, signal=33%
KEGG_PHENYLALANINE_METABOLISM	KEGG_PHENYLALANINE_METABOLISM	Details ...	17	0.561422	1.26614	0.227642	0.747888	1	2133	tags=47%, list=16%, signal=56%
KEGG_COMPLEMENT_AND_COAGULATION_CASCADES	KEGG_COMPLEMENT_AND_COAGULATION_CASCADES	Details ...	66	0.533571	1.26594	0.225296	0.746157	1	1979	tags=44%, list=15%, signal=52%
LIN_MELANOMA_COPY_NUMBER_DN	LIN_MELANOMA_COPY_NUMBER_DN	Details ...	37	0.407288	1.26496	0.208925	0.747125	1	3114	tags=43%, list=24%, signal=57%
KEGG_GALACTOSE_METABOLISM	KEGG_GALACTOSE_METABOLISM	Details ...	24	0.462583	1.26463	0.155419	0.7459	1	947	tags=29%, list=7%, signal=31%
REACTOME_PPARA_ACTIVATES_GENE_EXPRESSION	REACTOME_PPARA_ACTIVATES_GENE_EXPRESSION	Details ...	75	0.427409	1.26392	0.133333	0.7459	1	2462	tags=39%, list=19%, signal=47%
ICHIBA_GRAFT_VERSUS_HOST_DISEASE_35D_DN	ICHIBA_GRAFT_VERSUS_HOST_DISEASE_35D_DN	Details ...	41	0.466979	1.26355	0.148148	0.744717	1	2004	tags=37%, list=15%, signal=43%
REACTOME_IL1_SIGNALING	REACTOME_IL1_SIGNALING	Details ...	32	0.389686	1.26073	0.165254	0.752242	1	1430	tags=25%, list=11%, signal=28%
OUILLETTE_CLL_13Q14_DELETION_UP	OUILLETTE_CLL_13Q14_DELETION_UP	Details ...	47	0.379772	1.26037	0.148008	0.751143	1	1027	tags=19%, list=8%, signal=21%
REACTOME_INTRINSIC_PATHWAY	REACTOME_INTRINSIC_PATHWAY	Details ...	17	0.603552	1.25877	0.231237	0.754389	1	1896	tags=53%, list=15%, signal=62%
GERHOLD_ADIPOGENESIS_UP	GERHOLD_ADIPOGENESIS_UP	Details ...	47	0.452796	1.25709	0.173913	0.757982	1	3239	tags=55%, list=25%, signal=73%
ELVIDGE_HIF1A_TARGETS_UP	ELVIDGE_HIF1A_TARGETS_UP	Details ...	62	0.401635	1.25275	0.164634	0.77116	1	1956	tags=31%, list=15%, signal=36%
REACTOME_FORMATION_OF_TRANSCRIPTION_COUPLED_NER_TC_NER_REPAIR_COMPLEX	REACTOME_FORMATION_OF_TRANSCRIPTION_COUPLED_NER_TC_NER_REPAIR_COMPLEX	Details ...	27	0.386488	1.25174	0.208678	0.772347	1	2475	tags=37%, list=19%, signal=46%
KEGG_ARACHIDONIC_ACID_METABOLISM	KEGG_ARACHIDONIC_ACID_METABOLISM	Details ...	48	0.45275	1.25136	0.178571	0.771226	1	628	tags=21%, list=5%, signal=22%
CAIRO_HEPATOBLASTOMA_CLASSES_DN	CAIRO_HEPATOBLASTOMA_CLASSES_DN	Details ...	191	0.513476	1.2504	0.240664	0.772158	1	2103	tags=39%, list=16%, signal=46%
DACOSTA_UV_RESPONSE_VIA_ERCC3_XPCS_UP	DACOSTA_UV_RESPONSE_VIA_ERCC3_XPCS_UP	Details ...	23	0.452097	1.24902	0.178499	0.774702	1	2043	tags=35%, list=16%, signal=41%
REACTOME_REGULATION_OF_MITOTIC_CELL_CYCLE	REACTOME_REGULATION_OF_MITOTIC_CELL_CYCLE	Details ...	69	0.411768	1.24864	0.279528	0.773544	1	3316	tags=43%, list=25%, signal=58%
WANG_ESOPHAGUS_CANCER_VS_NORMAL_DN	WANG_ESOPHAGUS_CANCER_VS_NORMAL_DN	Details ...	92	0.366882	1.24731	0.132653	0.775923	1	2775	tags=35%, list=21%, signal=44%
REACTOME_GLYCOSPHINGOLIPID_METABOLISM	REACTOME_GLYCOSPHINGOLIPID_METABOLISM	Details ...	27	0.419136	1.24706	0.180934	0.774343	1	1851	tags=33%, list=14%, signal=39%
YANG_BREAST_CANCER_ESR1_BULK_UP	YANG_BREAST_CANCER_ESR1_BULK_UP	Details ...	21	0.503021	1.24611	0.151874	0.775271	1	1048	tags=33%, list=8%, signal=36%
FLECHNER_BIOPSY_KIDNEY_TRANSPLANT_OK_VS_DONOR_UP	FLECHNER_BIOPSY_KIDNEY_TRANSPLANT_OK_VS_DONOR_UP	Details ...	499	0.329286	1.24585	0.165692	0.773828	1	3556	tags=42%, list=27%, signal=55%
GOLDRATH_IMMUNE_MEMORY	GOLDRATH_IMMUNE_MEMORY	Details ...	54	0.378777	1.24577	0.158635	0.771679	1	1935	tags=31%, list=15%, signal=37%
ZWANG_EGF_INTERVAL_UP	ZWANG_EGF_INTERVAL_UP	Details ...	52	0.343064	1.24448	0.128459	0.773857	1	1075	tags=17%, list=8%, signal=19%
GRANDVAUX_IRF3_TARGETS_UP	GRANDVAUX_IRF3_TARGETS_UP	Details ...	15	0.631883	1.24446	0.231084	0.771521	1	367	tags=27%, list=3%, signal=27%
KAMMINGA_SENESCENCE	KAMMINGA_SENESCENCE	Details ...	26	0.422091	1.24364	0.161479	0.772179	1	1253	tags=23%, list=10%, signal=25%
ACEVEDO_LIVER_TUMOR_VS_NORMAL_ADJACENT_TISSUE_DN	ACEVEDO_LIVER_TUMOR_VS_NORMAL_ADJACENT_TISSUE_DN	Details ...	218	0.465744	1.24341	0.184369	0.770573	1	1396	tags=29%, list=11%, signal=32%
TOMLINS_METASTASIS_DN	TOMLINS_METASTASIS_DN	Details ...	16	0.47369	1.24331	0.188716	0.768571	1	2596	tags=44%, list=20%, signal=55%
HU_ANGIOGENESIS_DN	HU_ANGIOGENESIS_DN	Details ...	33	0.415482	1.2426	0.213552	0.768806	1	3780	tags=52%, list=29%, signal=72%
CHANG_IMMORTALIZED_BY_HPV31_UP	CHANG_IMMORTALIZED_BY_HPV31_UP	Details ...	57	0.394029	1.24151	0.126033	0.770304	1	883	tags=19%, list=7%, signal=21%
BAE_BRCA1_TARGETS_UP	BAE_BRCA1_TARGETS_UP	Details ...	72	0.370408	1.24118	0.152642	0.76914	1	3001	tags=42%, list=23%, signal=54%
SMID_BREAST_CANCER_RELAPSE_IN_BONE_UP	SMID_BREAST_CANCER_RELAPSE_IN_BONE_UP	Details ...	87	0.401589	1.24094	0.109937	0.767568	1	919	tags=22%, list=7%, signal=23%
CASTELLANO_NRAS_TARGETS_UP	CASTELLANO_NRAS_TARGETS_UP	Details ...	58	0.441781	1.24091	0.16699	0.765398	1	1295	tags=33%, list=10%, signal=36%
REACTOME_APOPTOSIS	REACTOME_APOPTOSIS	Details ...	132	0.301711	1.24025	0.160305	0.765227	1	3667	tags=42%, list=28%, signal=57%
YEGNASUBRAMANIAN_PROSTATE_CANCER	YEGNASUBRAMANIAN_PROSTATE_CANCER	Details ...	117	0.430456	1.24004	0.165289	0.763804	1	2076	tags=31%, list=16%, signal=36%
REACTOME_ACTIVATION_OF_CHAPERONE_GENES_BY_XBP1S	REACTOME_ACTIVATION_OF_CHAPERONE_GENES_BY_XBP1S	Details ...	43	0.410289	1.23877	0.245509	0.765998	1	2758	tags=42%, list=21%, signal=53%
KEGG_ADIPOCYTOKINE_SIGNALING_PATHWAY	KEGG_ADIPOCYTOKINE_SIGNALING_PATHWAY	Details ...	62	0.38634	1.2375	0.199593	0.768153	1	2749	tags=35%, list=21%, signal=45%
KEGG_BIOSYNTHESIS_OF_UNSATURATED_FATTY_ACIDS	KEGG_BIOSYNTHESIS_OF_UNSATURATED_FATTY_ACIDS	Details ...	19	0.560887	1.23743	0.204633	0.76608	1	3357	tags=63%, list=26%, signal=85%
KYNG_NORMAL_AGING_DN	KYNG_NORMAL_AGING_DN	Details ...	20	0.472908	1.23699	0.179584	0.765421	1	2022	tags=40%, list=16%, signal=47%
WANG_BARRETTS_ESOPHAGUS_UP	WANG_BARRETTS_ESOPHAGUS_UP	Details ...	46	0.432904	1.23685	0.148776	0.763641	1	1488	tags=26%, list=11%, signal=29%
SAKAI_CHRONIC_HEPATITIS_VS_LIVER_CANCER_UP	SAKAI_CHRONIC_HEPATITIS_VS_LIVER_CANCER_UP	Details ...	73	0.380694	1.23668	0.197605	0.761961	1	1872	tags=29%, list=14%, signal=33%
REACTOME_FORMATION_OF_FIBRIN_CLOT_CLOTTING_CASCADE	REACTOME_FORMATION_OF_FIBRIN_CLOT_CLOTTING_CASCADE	Details ...	32	0.516874	1.23488	0.263052	0.76599	1	1896	tags=47%, list=15%, signal=55%
SMID_BREAST_CANCER_ERBB2_UP	SMID_BREAST_CANCER_ERBB2_UP	Details ...	132	0.388513	1.23316	0.155303	0.769649	1	2096	tags=33%, list=16%, signal=39%
BIOCARTA_STRESS_PATHWAY	BIOCARTA_STRESS_PATHWAY	Details ...	25	0.365807	1.23274	0.197581	0.768887	1	1521	tags=24%, list=12%, signal=27%
TURASHVILI_BREAST_LOBULAR_CARCINOMA_VS_LOBULAR_NORMAL_UP	TURASHVILI_BREAST_LOBULAR_CARCINOMA_VS_LOBULAR_NORMAL_UP	Details ...	73	0.390091	1.23271	0.1222	0.766752	1	2039	tags=33%, list=16%, signal=39%
CHENG_RESPONSE_TO_NICKEL_ACETATE	CHENG_RESPONSE_TO_NICKEL_ACETATE	Details ...	36	0.355767	1.2325	0.180527	0.765275	1	2862	tags=42%, list=22%, signal=53%
LEE_LIVER_CANCER_CIPROFIBRATE_UP	LEE_LIVER_CANCER_CIPROFIBRATE_UP	Details ...	57	0.448182	1.23153	0.110454	0.766331	1	1258	tags=28%, list=10%, signal=31%
VANTVEER_BREAST_CANCER_ESR1_UP	VANTVEER_BREAST_CANCER_ESR1_UP	Details ...	119	0.334481	1.23017	0.135135	0.768962	1	2500	tags=32%, list=19%, signal=39%
ELVIDGE_HYPOXIA_BY_DMOG_DN	ELVIDGE_HYPOXIA_BY_DMOG_DN	Details ...	54	0.384503	1.23011	0.144	0.766946	1	2705	tags=33%, list=21%, signal=42%
DAIRKEE_TERT_TARGETS_UP	DAIRKEE_TERT_TARGETS_UP	Details ...	287	0.293219	1.22954	0.182711	0.766819	1	3041	tags=30%, list=23%, signal=38%
KEGG_GLYCEROLIPID_METABOLISM	KEGG_GLYCEROLIPID_METABOLISM	Details ...	38	0.416941	1.22926	0.186538	0.765622	1	1760	tags=32%, list=14%, signal=36%
MELLMAN_TUT1_TARGETS_DN	MELLMAN_TUT1_TARGETS_DN	Details ...	42	0.388576	1.22923	0.127016	0.763568	1	2860	tags=43%, list=22%, signal=55%
REACTOME_UNFOLDED_PROTEIN_RESPONSE	REACTOME_UNFOLDED_PROTEIN_RESPONSE	Details ...	72	0.372875	1.22857	0.217742	0.76366	1	2769	tags=40%, list=21%, signal=51%
BIOCARTA_TOLL_PATHWAY	BIOCARTA_TOLL_PATHWAY	Details ...	32	0.39174	1.2272	0.195918	0.766393	1	2925	tags=34%, list=22%, signal=44%
BANDRES_RESPONSE_TO_CARMUSTIN_WITHOUT_MGMT_48HR_UP	BANDRES_RESPONSE_TO_CARMUSTIN_WITHOUT_MGMT_48HR_UP	Details ...	18	0.445324	1.22624	0.208861	0.7675	1	974	tags=22%, list=7%, signal=24%
WANG_TUMOR_INVASIVENESS_DN	WANG_TUMOR_INVASIVENESS_DN	Details ...	174	0.320853	1.22589	0.155242	0.766558	1	2971	tags=37%, list=23%, signal=47%
REACTOME_METABOLISM_OF_VITAMINS_AND_COFACTORS	REACTOME_METABOLISM_OF_VITAMINS_AND_COFACTORS	Details ...	43	0.412519	1.22582	0.216102	0.764643	1	2872	tags=49%, list=22%, signal=62%
HOSHIDA_LIVER_CANCER_LATE_RECURRENCE_DN	HOSHIDA_LIVER_CANCER_LATE_RECURRENCE_DN	Details ...	66	0.377715	1.22468	0.192385	0.766312	1	2841	tags=35%, list=22%, signal=44%
ALONSO_METASTASIS_UP	ALONSO_METASTASIS_UP	Details ...	163	0.345251	1.22453	0.183953	0.764694	1	3693	tags=45%, list=28%, signal=63%
VANTVEER_BREAST_CANCER_METASTASIS_UP	VANTVEER_BREAST_CANCER_METASTASIS_UP	Details ...	38	0.425731	1.22446	0.179752	0.762809	1	687	tags=21%, list=5%, signal=22%
PID_ARF_3PATHWAY	PID_ARF_3PATHWAY	Details ...	15	0.464285	1.22433	0.262136	0.761163	1	2756	tags=53%, list=21%, signal=68%
REACTOME_HOST_INTERACTIONS_OF_HIV_FACTORS	REACTOME_HOST_INTERACTIONS_OF_HIV_FACTORS	Details ...	115	0.316063	1.22329	0.241779	0.762707	1	3206	tags=38%, list=25%, signal=50%
BIOCARTA_AT1R_PATHWAY	BIOCARTA_AT1R_PATHWAY	Details ...	31	0.353625	1.22013	0.200393	0.771941	1	3277	tags=35%, list=25%, signal=47%
GOBERT_CORE_OLIGODENDROCYTE_DIFFERENTIATION	GOBERT_CORE_OLIGODENDROCYTE_DIFFERENTIATION	Details ...	32	0.371809	1.2201	0.168627	0.769948	1	2421	tags=47%, list=19%, signal=57%
LUI_TARGETS_OF_PAX8_PPARG_FUSION	LUI_TARGETS_OF_PAX8_PPARG_FUSION	Details ...	28	0.389535	1.21892	0.255814	0.771806	1	3585	tags=43%, list=28%, signal=59%
REACTOME_BASE_EXCISION_REPAIR	REACTOME_BASE_EXCISION_REPAIR	Details ...	18	0.478707	1.21687	0.25641	0.776607	1	1372	tags=28%, list=11%, signal=31%
CAIRO_HEPATOBLASTOMA_POOR_SURVIVAL	CAIRO_HEPATOBLASTOMA_POOR_SURVIVAL	Details ...	15	0.563157	1.21591	0.208	0.777778	1	800	tags=40%, list=6%, signal=43%
REACTOME_TRANSPORT_OF_VITAMINS_NUCLEOSIDES_AND_RELATED_MOLECULES	REACTOME_TRANSPORT_OF_VITAMINS_NUCLEOSIDES_AND_RELATED_MOLECULES	Details ...	26	0.439399	1.21576	0.177043	0.776142	1	689	tags=23%, list=5%, signal=24%
PENG_LEUCINE_DEPRIVATION_UP	PENG_LEUCINE_DEPRIVATION_UP	Details ...	129	0.315019	1.21389	0.129412	0.780359	1	2946	tags=39%, list=23%, signal=50%
KEGG_NITROGEN_METABOLISM	KEGG_NITROGEN_METABOLISM	Details ...	22	0.512048	1.2134	0.209581	0.779986	1	2004	tags=45%, list=15%, signal=54%
KANG_DOXORUBICIN_RESISTANCE_DN	KANG_DOXORUBICIN_RESISTANCE_DN	Details ...	17	0.534615	1.21337	0.240891	0.777987	1	2517	tags=47%, list=19%, signal=58%
AGUIRRE_PANCREATIC_CANCER_COPY_NUMBER_DN	AGUIRRE_PANCREATIC_CANCER_COPY_NUMBER_DN	Details ...	204	0.302347	1.21219	0.191617	0.779819	1	2996	tags=32%, list=23%, signal=41%
SCHAEFFER_PROSTATE_DEVELOPMENT_6HR_UP	SCHAEFFER_PROSTATE_DEVELOPMENT_6HR_UP	Details ...	134	0.336884	1.21191	0.159449	0.778649	1	3039	tags=38%, list=23%, signal=49%
DITTMER_PTHLH_TARGETS_DN	DITTMER_PTHLH_TARGETS_DN	Details ...	70	0.338311	1.21153	0.178431	0.777866	1	1403	tags=20%, list=11%, signal=22%
MARIADASON_REGULATED_BY_HISTONE_ACETYLATION_UP	MARIADASON_REGULATED_BY_HISTONE_ACETYLATION_UP	Details ...	63	0.357303	1.21032	0.14425	0.77995	1	2522	tags=33%, list=19%, signal=41%
WAKABAYASHI_ADIPOGENESIS_PPARG_RXRA_BOUND_36HR	WAKABAYASHI_ADIPOGENESIS_PPARG_RXRA_BOUND_36HR	Details ...	98	0.351781	1.20914	0.218324	0.781819	1	2729	tags=39%, list=21%, signal=49%
SUZUKI_RESPONSE_TO_TSA	SUZUKI_RESPONSE_TO_TSA	Details ...	17	0.42912	1.20897	0.198819	0.780343	1	2649	tags=35%, list=20%, signal=44%
BYSTRYKH_HEMATOPOIESIS_STEM_CELL_QTL_CIS	BYSTRYKH_HEMATOPOIESIS_STEM_CELL_QTL_CIS	Details ...	97	0.31768	1.20862	0.1611	0.779492	1	2633	tags=36%, list=20%, signal=45%
REACTOME_RESOLUTION_OF_AP_SITES_VIA_THE_MULTIPLE_NUCLEOTIDE_PATCH_REPLACEMENT_PATHWAY	REACTOME_RESOLUTION_OF_AP_SITES_VIA_THE_MULTIPLE_NUCLEOTIDE_PATCH_REPLACEMENT_PATHWAY	Details ...	16	0.492784	1.20475	0.256959	0.790766	1	1372	tags=31%, list=11%, signal=35%
BRACHAT_RESPONSE_TO_CAMPTOTHECIN_DN	BRACHAT_RESPONSE_TO_CAMPTOTHECIN_DN	Details ...	39	0.375983	1.20429	0.20404	0.790141	1	3163	tags=38%, list=24%, signal=51%
KIM_TIAL1_TARGETS	KIM_TIAL1_TARGETS	Details ...	29	0.445851	1.20395	0.205479	0.78922	1	2890	tags=55%, list=22%, signal=71%
MARCINIAK_ER_STRESS_RESPONSE_VIA_CHOP	MARCINIAK_ER_STRESS_RESPONSE_VIA_CHOP	Details ...	22	0.399939	1.20392	0.218947	0.787259	1	2314	tags=41%, list=18%, signal=50%
LUI_THYROID_CANCER_PAX8_PPARG_DN	LUI_THYROID_CANCER_PAX8_PPARG_DN	Details ...	39	0.395862	1.20299	0.262042	0.788319	1	2971	tags=41%, list=23%, signal=53%
BRACHAT_RESPONSE_TO_METHOTREXATE_DN	BRACHAT_RESPONSE_TO_METHOTREXATE_DN	Details ...	24	0.411956	1.20297	0.232514	0.786322	1	1937	tags=33%, list=15%, signal=39%
GRAESSMANN_RESPONSE_TO_MC_AND_DOXORUBICIN_UP	GRAESSMANN_RESPONSE_TO_MC_AND_DOXORUBICIN_UP	Details ...	452	0.282947	1.20054	0.11002	0.792544	1	2272	tags=25%, list=17%, signal=29%
WANG_RESPONSE_TO_FORSKOLIN_UP	WANG_RESPONSE_TO_FORSKOLIN_UP	Details ...	20	0.444683	1.20003	0.246914	0.792387	1	2907	tags=40%, list=22%, signal=51%
SESTO_RESPONSE_TO_UV_C7	SESTO_RESPONSE_TO_UV_C7	Details ...	65	0.39704	1.19938	0.17451	0.792519	1	1767	tags=31%, list=14%, signal=35%
CHIANG_LIVER_CANCER_SUBCLASS_CTNNB1_UP	CHIANG_LIVER_CANCER_SUBCLASS_CTNNB1_UP	Details ...	131	0.566884	1.1992	0.28903	0.791111	1	2379	tags=43%, list=18%, signal=52%
CHEN_LIVER_METABOLISM_QTL_CIS	CHEN_LIVER_METABOLISM_QTL_CIS	Details ...	68	0.425597	1.19811	0.219262	0.792803	1	2339	tags=37%, list=18%, signal=45%
IVANOVA_HEMATOPOIESIS_LATE_PROGENITOR	IVANOVA_HEMATOPOIESIS_LATE_PROGENITOR	Details ...	366	0.308374	1.19541	0.152918	0.800011	1	2555	tags=28%, list=20%, signal=34%
PUIFFE_INVASION_INHIBITED_BY_ASCITES_UP	PUIFFE_INVASION_INHIBITED_BY_ASCITES_UP	Details ...	76	0.399088	1.19292	0.231801	0.806391	1	2311	tags=33%, list=18%, signal=40%
REACTOME_SHC_RELATED_EVENTS	REACTOME_SHC_RELATED_EVENTS	Details ...	16	0.439967	1.19289	0.267606	0.804465	1	3170	tags=44%, list=24%, signal=58%
SCHRAMM_INHBA_TARGETS_DN	SCHRAMM_INHBA_TARGETS_DN	Details ...	24	0.418934	1.19236	0.244856	0.804218	1	1175	tags=29%, list=9%, signal=32%
CORRE_MULTIPLE_MYELOMA_UP	CORRE_MULTIPLE_MYELOMA_UP	Details ...	52	0.385103	1.19111	0.174853	0.806477	1	1228	tags=17%, list=9%, signal=19%
KEGG_MISMATCH_REPAIR	KEGG_MISMATCH_REPAIR	Details ...	23	0.523615	1.19024	0.285714	0.807451	1	2448	tags=57%, list=19%, signal=69%
KAYO_CALORIE_RESTRICTION_MUSCLE_DN	KAYO_CALORIE_RESTRICTION_MUSCLE_DN	Details ...	76	0.299355	1.18815	0.175258	0.812525	1	3092	tags=34%, list=24%, signal=45%
BALDWIN_PRKCI_TARGETS_UP	BALDWIN_PRKCI_TARGETS_UP	Details ...	33	0.395252	1.1875	0.206897	0.812598	1	1852	tags=27%, list=14%, signal=32%
REACTOME_GABA_SYNTHESIS_RELEASE_REUPTAKE_AND_DEGRADATION	REACTOME_GABA_SYNTHESIS_RELEASE_REUPTAKE_AND_DEGRADATION	Details ...	15	0.493952	1.18737	0.239837	0.811008	1	834	tags=20%, list=6%, signal=21%
GALE_APL_WITH_FLT3_MUTATED_DN	GALE_APL_WITH_FLT3_MUTATED_DN	Details ...	16	0.492572	1.18698	0.279923	0.810335	1	2737	tags=56%, list=21%, signal=71%
WAMUNYOKOLI_OVARIAN_CANCER_GRADES_1_2_UP	WAMUNYOKOLI_OVARIAN_CANCER_GRADES_1_2_UP	Details ...	97	0.402907	1.18637	0.226121	0.810456	1	2675	tags=37%, list=21%, signal=46%
JAZAG_TGFB1_SIGNALING_UP	JAZAG_TGFB1_SIGNALING_UP	Details ...	100	0.278264	1.18609	0.151515	0.809414	1	904	tags=13%, list=7%, signal=14%
REACTOME_PROLONGED_ERK_ACTIVATION_EVENTS	REACTOME_PROLONGED_ERK_ACTIVATION_EVENTS	Details ...	17	0.406009	1.18514	0.272189	0.810638	1	1161	tags=24%, list=9%, signal=26%
REACTOME_TRANSCRIPTION_COUPLED_NER_TC_NER	REACTOME_TRANSCRIPTION_COUPLED_NER_TC_NER		42	0.4035	1.18277	0.282565	0.816854	1	2147	tags=36%, list=16%, signal=43%
LIM_MAMMARY_LUMINAL_MATURE_UP	LIM_MAMMARY_LUMINAL_MATURE_UP		85	0.349614	1.18147	0.172708	0.819246	1	2318	tags=27%, list=18%, signal=33%
REACTOME_COMPLEMENT_CASCADE	REACTOME_COMPLEMENT_CASCADE		27	0.57292	1.18007	0.295775	0.821898	1	1979	tags=48%, list=15%, signal=57%
SEIDEN_ONCOGENESIS_BY_MET	SEIDEN_ONCOGENESIS_BY_MET		73	0.385572	1.17983	0.260692	0.820605	1	3477	tags=47%, list=27%, signal=63%
KYNG_DNA_DAMAGE_BY_4NQO	KYNG_DNA_DAMAGE_BY_4NQO		37	0.405436	1.17571	0.214	0.8325	1	2842	tags=43%, list=22%, signal=55%
REACTOME_LIPOPROTEIN_METABOLISM	REACTOME_LIPOPROTEIN_METABOLISM		26	0.457554	1.17393	0.296724	0.836673	1	2738	tags=46%, list=21%, signal=58%
PID_HNF3B_PATHWAY	PID_HNF3B_PATHWAY		38	0.486384	1.17329	0.260274	0.836716	1	2281	tags=47%, list=18%, signal=57%
PID_CERAMIDE_PATHWAY	PID_CERAMIDE_PATHWAY		47	0.330433	1.17266	0.222008	0.836825	1	3667	tags=43%, list=28%, signal=59%
BURTON_ADIPOGENESIS_4	BURTON_ADIPOGENESIS_4		41	0.370374	1.17263	0.237817	0.834877	1	2036	tags=27%, list=16%, signal=32%
BARRIER_CANCER_RELAPSE_NORMAL_SAMPLE_UP	BARRIER_CANCER_RELAPSE_NORMAL_SAMPLE_UP		31	0.407899	1.17245	0.218216	0.833463	1	2171	tags=39%, list=17%, signal=46%
PID_FOXO_PATHWAY	PID_FOXO_PATHWAY		42	0.36435	1.17182	0.226804	0.833581	1	2610	tags=33%, list=20%, signal=42%
GRABARCZYK_BCL11B_TARGETS_DN	GRABARCZYK_BCL11B_TARGETS_DN		44	0.348757	1.17073	0.220676	0.835143	1	1818	tags=25%, list=14%, signal=29%
GRADE_METASTASIS_DN	GRADE_METASTASIS_DN		39	0.337131	1.17061	0.25641	0.833475	1	2731	tags=31%, list=21%, signal=39%
REACTOME_SLC_MEDIATED_TRANSMEMBRANE_TRANSPORT	REACTOME_SLC_MEDIATED_TRANSMEMBRANE_TRANSPORT		189	0.30676	1.1702	0.175258	0.832906	1	947	tags=15%, list=7%, signal=16%
KEGG_FRUCTOSE_AND_MANNOSE_METABOLISM	KEGG_FRUCTOSE_AND_MANNOSE_METABOLISM		32	0.42901	1.16984	0.237113	0.83216	1	1513	tags=28%, list=12%, signal=32%
KAAB_FAILED_HEART_VENTRICLE_DN	KAAB_FAILED_HEART_VENTRICLE_DN		38	0.430181	1.16835	0.260593	0.835267	1	2619	tags=34%, list=20%, signal=43%
DACOSTA_UV_RESPONSE_VIA_ERCC3_UP	DACOSTA_UV_RESPONSE_VIA_ERCC3_UP		281	0.315259	1.16627	0.206049	0.840523	1	3034	tags=35%, list=23%, signal=44%
DAZARD_UV_RESPONSE_CLUSTER_G4	DAZARD_UV_RESPONSE_CLUSTER_G4		18	0.446927	1.16447	0.272908	0.844826	1	2912	tags=44%, list=22%, signal=57%
TSUNODA_CISPLATIN_RESISTANCE_DN	TSUNODA_CISPLATIN_RESISTANCE_DN		45	0.427738	1.16406	0.25498	0.844298	1	1901	tags=36%, list=15%, signal=41%
IIZUKA_LIVER_CANCER_PROGRESSION_L1_G1_UP	IIZUKA_LIVER_CANCER_PROGRESSION_L1_G1_UP		23	0.558113	1.16396	0.296296	0.842651	1	1771	tags=43%, list=14%, signal=50%
REACTOME_REGULATION_OF_GENE_EXPRESSION_IN_BETA_CELLS	REACTOME_REGULATION_OF_GENE_EXPRESSION_IN_BETA_CELLS		16	0.481539	1.16316	0.297694	0.843406	1	947	tags=19%, list=7%, signal=20%
CHEN_PDGF_TARGETS	CHEN_PDGF_TARGETS		18	0.450338	1.16099	0.246094	0.848669	1	3075	tags=39%, list=24%, signal=51%
MARCHINI_TRABECTEDIN_RESISTANCE_UP	MARCHINI_TRABECTEDIN_RESISTANCE_UP		21	0.428339	1.16029	0.244533	0.849092	1	2189	tags=33%, list=17%, signal=40%
GOTZMANN_EPITHELIAL_TO_MESENCHYMAL_TRANSITION_DN	GOTZMANN_EPITHELIAL_TO_MESENCHYMAL_TRANSITION_DN		197	0.299967	1.16015	0.190283	0.847594	1	2068	tags=27%, list=16%, signal=32%
YANG_BREAST_CANCER_ESR1_UP	YANG_BREAST_CANCER_ESR1_UP		34	0.397919	1.1597	0.224742	0.84713	1	424	tags=18%, list=3%, signal=18%
RIZKI_TUMOR_INVASIVENESS_2D_DN	RIZKI_TUMOR_INVASIVENESS_2D_DN		61	0.305576	1.15969	0.208092	0.845202	1	1426	tags=20%, list=11%, signal=22%
REACTOME_PROTEOLYTIC_CLEAVAGE_OF_SNARE_COMPLEX_PROTEINS	REACTOME_PROTEOLYTIC_CLEAVAGE_OF_SNARE_COMPLEX_PROTEINS		15	0.452771	1.15919	0.26494	0.844882	1	3424	tags=47%, list=26%, signal=63%
LIU_SOX4_TARGETS_DN	LIU_SOX4_TARGETS_DN		260	0.312922	1.15861	0.228516	0.844814	1	3300	tags=35%, list=25%, signal=46%
REACTOME_LYSOSOME_VESICLE_BIOGENESIS	REACTOME_LYSOSOME_VESICLE_BIOGENESIS		21	0.407062	1.15732	0.292636	0.84725	1	2737	tags=38%, list=21%, signal=48%
NUTT_GBM_VS_AO_GLIOMA_DN	NUTT_GBM_VS_AO_GLIOMA_DN		41	0.33279	1.15567	0.255906	0.850891	1	1607	tags=15%, list=12%, signal=17%
REACTOME_XENOBIOTICS	REACTOME_XENOBIOTICS		15	0.596968	1.15545	0.315789	0.849676	1	2307	tags=53%, list=18%, signal=65%
HAHTOLA_MYCOSIS_FUNGOIDES_UP	HAHTOLA_MYCOSIS_FUNGOIDES_UP		18	0.486356	1.15507	0.272908	0.849044	1	1100	tags=33%, list=8%, signal=36%
SPIELMAN_LYMPHOBLAST_EUROPEAN_VS_ASIAN_2FC_DN	SPIELMAN_LYMPHOBLAST_EUROPEAN_VS_ASIAN_2FC_DN		19	0.496427	1.1541	0.263581	0.85055	1	2042	tags=42%, list=16%, signal=50%
MONNIER_POSTRADIATION_TUMOR_ESCAPE_DN	MONNIER_POSTRADIATION_TUMOR_ESCAPE_DN		243	0.309566	1.15383	0.204365	0.849458	1	2695	tags=32%, list=21%, signal=40%
IVANOVA_HEMATOPOIESIS_EARLY_PROGENITOR	IVANOVA_HEMATOPOIESIS_EARLY_PROGENITOR		347	0.271558	1.15373	0.185185	0.84784	1	2722	tags=29%, list=21%, signal=35%
JOSEPH_RESPONSE_TO_SODIUM_BUTYRATE_UP	JOSEPH_RESPONSE_TO_SODIUM_BUTYRATE_UP		29	0.396765	1.15348	0.263359	0.846792	1	3135	tags=45%, list=24%, signal=59%
REACTOME_DIABETES_PATHWAYS	REACTOME_DIABETES_PATHWAYS		116	0.323681	1.1534	0.227273	0.845126	1	2816	tags=38%, list=22%, signal=48%
KAAB_FAILED_HEART_ATRIUM_DN	KAAB_FAILED_HEART_ATRIUM_DN		131	0.328828	1.15295	0.273077	0.84474	1	3159	tags=37%, list=24%, signal=49%
REACTOME_ASSEMBLY_OF_THE_PRE_REPLICATIVE_COMPLEX	REACTOME_ASSEMBLY_OF_THE_PRE_REPLICATIVE_COMPLEX		55	0.394374	1.15277	0.354902	0.843436	1	3316	tags=47%, list=25%, signal=63%
REACTOME_ORC1_REMOVAL_FROM_CHROMATIN	REACTOME_ORC1_REMOVAL_FROM_CHROMATIN		57	0.390718	1.15239	0.326172	0.842838	1	3602	tags=51%, list=28%, signal=70%
ODONNELL_METASTASIS_DN	ODONNELL_METASTASIS_DN		24	0.38502	1.15219	0.237624	0.841626	1	1593	tags=25%, list=12%, signal=28%
KUMAR_AUTOPHAGY_NETWORK	KUMAR_AUTOPHAGY_NETWORK		40	0.337726	1.15203	0.25102	0.840207	1	889	tags=20%, list=7%, signal=21%
SMITH_TERT_TARGETS_DN	SMITH_TERT_TARGETS_DN		83	0.343548	1.1517	0.223909	0.839501	1	1314	tags=22%, list=10%, signal=24%
GINESTIER_BREAST_CANCER_ZNF217_AMPLIFIED_UP	GINESTIER_BREAST_CANCER_ZNF217_AMPLIFIED_UP		53	0.357533	1.15159	0.278	0.838013	1	2205	tags=28%, list=17%, signal=34%
LIANG_HEMATOPOIESIS_STEM_CELL_NUMBER_SMALL_VS_HUGE_UP	LIANG_HEMATOPOIESIS_STEM_CELL_NUMBER_SMALL_VS_HUGE_UP		34	0.401834	1.15107	0.242485	0.837913	1	1295	tags=26%, list=10%, signal=29%
KEGG_LYSOSOME	KEGG_LYSOSOME		108	0.331621	1.15066	0.297456	0.837377	1	2699	tags=33%, list=21%, signal=42%
IVANOVA_HEMATOPOIESIS_MATURE_CELL	IVANOVA_HEMATOPOIESIS_MATURE_CELL		202	0.283803	1.14996	0.196393	0.837874	1	2359	tags=27%, list=18%, signal=33%
LANDIS_ERBB2_BREAST_TUMORS_324_DN	LANDIS_ERBB2_BREAST_TUMORS_324_DN		132	0.391584	1.14984	0.262231	0.836372	1	2398	tags=38%, list=18%, signal=46%
REACTOME_BIOSYNTHESIS_OF_THE_N_GLYCAN_PRECURSOR_DOLICHOL_LIPID_LINKED_OLIGOSACCHARIDE_LLO_AND_TRANSFER_TO_A_NASCENT_PROTEIN	REACTOME_BIOSYNTHESIS_OF_THE_N_GLYCAN_PRECURSOR_DOLICHOL_LIPID_LINKED_OLIGOSACCHARIDE_LLO_AND_TRANSFER_TO_A_NASCENT_PROTEIN		19	0.428458	1.1497	0.310484	0.835036	1	2774	tags=47%, list=21%, signal=60%
REACTOME_METABOLISM_OF_CARBOHYDRATES	REACTOME_METABOLISM_OF_CARBOHYDRATES		201	0.293214	1.14936	0.194779	0.834272	1	1556	tags=20%, list=12%, signal=22%
CADWELL_ATG16L1_TARGETS_DN	CADWELL_ATG16L1_TARGETS_DN		47	0.372067	1.14852	0.216891	0.835277	1	1737	tags=32%, list=13%, signal=37%
ZHAN_MULTIPLE_MYELOMA_CD2_DN	ZHAN_MULTIPLE_MYELOMA_CD2_DN		33	0.402919	1.14838	0.252485	0.833862	1	2786	tags=39%, list=21%, signal=50%
REACTOME_METABOLISM_OF_STEROID_HORMONES_AND_VITAMINS_A_AND_D	REACTOME_METABOLISM_OF_STEROID_HORMONES_AND_VITAMINS_A_AND_D		31	0.424692	1.14645	0.279678	0.83839	1	702	tags=16%, list=5%, signal=17%
BIOCARTA_DEATH_PATHWAY	BIOCARTA_DEATH_PATHWAY		31	0.363829	1.1461	0.264591	0.837623	1	3664	tags=55%, list=28%, signal=76%
GAUSSMANN_MLL_AF4_FUSION_TARGETS_G_DN	GAUSSMANN_MLL_AF4_FUSION_TARGETS_G_DN		28	0.411843	1.14588	0.243299	0.83656	1	2155	tags=36%, list=17%, signal=43%
HESS_TARGETS_OF_HOXA9_AND_MEIS1_UP	HESS_TARGETS_OF_HOXA9_AND_MEIS1_UP		56	0.383031	1.14533	0.271825	0.836529	1	1455	tags=25%, list=11%, signal=28%
TERAO_AOX4_TARGETS_HG_UP	TERAO_AOX4_TARGETS_HG_UP		18	0.391719	1.14412	0.316562	0.838751	1	3641	tags=50%, list=28%, signal=69%
TARTE_PLASMA_CELL_VS_B_LYMPHOCYTE_UP	TARTE_PLASMA_CELL_VS_B_LYMPHOCYTE_UP		75	0.347046	1.14403	0.265873	0.837209	1	2758	tags=40%, list=21%, signal=50%
TIEN_INTESTINE_PROBIOTICS_24HR_DN	TIEN_INTESTINE_PROBIOTICS_24HR_DN		194	0.334581	1.1436	0.26694	0.836879	1	2470	tags=32%, list=19%, signal=39%
BONOME_OVARIAN_CANCER_SURVIVAL_OPTIMAL_DEBULKING	BONOME_OVARIAN_CANCER_SURVIVAL_OPTIMAL_DEBULKING		216	0.260573	1.14322	0.167954	0.836477	1	2227	tags=22%, list=17%, signal=26%
REACTOME_CTNNB1_PHOSPHORYLATION_CASCADE	REACTOME_CTNNB1_PHOSPHORYLATION_CASCADE		15	0.46721	1.14188	0.310413	0.839095	1	2507	tags=47%, list=19%, signal=58%
RAO_BOUND_BY_SALL4_ISOFORM_A	RAO_BOUND_BY_SALL4_ISOFORM_A		114	0.264676	1.14183	0.214286	0.837457	1	1614	tags=20%, list=12%, signal=23%
LEE_CALORIE_RESTRICTION_MUSCLE_UP	LEE_CALORIE_RESTRICTION_MUSCLE_UP		38	0.364104	1.14144	0.267748	0.836878	1	2845	tags=34%, list=22%, signal=44%
KEGG_RENIN_ANGIOTENSIN_SYSTEM	KEGG_RENIN_ANGIOTENSIN_SYSTEM		16	0.478553	1.14077	0.323232	0.837213	1	1807	tags=31%, list=14%, signal=36%
BIOCARTA_NFKB_PATHWAY	BIOCARTA_NFKB_PATHWAY		22	0.371416	1.14023	0.282258	0.837294	1	1145	tags=23%, list=9%, signal=25%
HASLINGER_B_CLL_WITH_6Q21_DELETION	HASLINGER_B_CLL_WITH_6Q21_DELETION		18	0.448412	1.13765	0.293279	0.843941	1	1545	tags=28%, list=12%, signal=31%
KEGG_UBIQUITIN_MEDIATED_PROTEOLYSIS	KEGG_UBIQUITIN_MEDIATED_PROTEOLYSIS		107	0.300575	1.13699	0.285149	0.844404	1	3730	tags=42%, list=29%, signal=58%
ONDER_CDH1_TARGETS_1_UP	ONDER_CDH1_TARGETS_1_UP		124	0.342024	1.13611	0.222008	0.845544	1	2448	tags=34%, list=19%, signal=41%
ELLWOOD_MYC_TARGETS_DN	ELLWOOD_MYC_TARGETS_DN		27	0.380845	1.13598	0.276342	0.844139	1	1888	tags=30%, list=14%, signal=35%
BILANGES_RAPAMYCIN_SENSITIVE_GENES	BILANGES_RAPAMYCIN_SENSITIVE_GENES		32	0.324235	1.13577	0.295585	0.843115	1	838	tags=13%, list=6%, signal=13%
SHAFFER_IRF4_TARGETS_IN_MYELOMA_VS_MATURE_B_LYMPHOCYTE	SHAFFER_IRF4_TARGETS_IN_MYELOMA_VS_MATURE_B_LYMPHOCYTE		97	0.338525	1.13433	0.287129	0.845964	1	2359	tags=31%, list=18%, signal=37%
AMUNDSON_RESPONSE_TO_ARSENITE	AMUNDSON_RESPONSE_TO_ARSENITE		189	0.305537	1.13042	0.26494	0.857122	1	2470	tags=30%, list=19%, signal=37%
PID_RETINOIC_ACID_PATHWAY	PID_RETINOIC_ACID_PATHWAY		28	0.347036	1.12926	0.287169	0.859113	1	1521	tags=21%, list=12%, signal=24%
REACTOME_LIPID_DIGESTION_MOBILIZATION_AND_TRANSPORT	REACTOME_LIPID_DIGESTION_MOBILIZATION_AND_TRANSPORT		41	0.40642	1.12866	0.297244	0.859301	1	2206	tags=34%, list=17%, signal=41%
TOOKER_GEMCITABINE_RESISTANCE_DN	TOOKER_GEMCITABINE_RESISTANCE_DN		113	0.355832	1.12797	0.288306	0.859822	1	2118	tags=32%, list=16%, signal=38%
PETRETTO_HEART_MASS_QTL_CIS_DN	PETRETTO_HEART_MASS_QTL_CIS_DN		18	0.436655	1.12766	0.29222	0.859027	1	2540	tags=39%, list=19%, signal=48%
BROWNE_HCMV_INFECTION_10HR_DN	BROWNE_HCMV_INFECTION_10HR_DN		50	0.348055	1.12754	0.28252	0.857597	1	2695	tags=36%, list=21%, signal=45%
SCHUHMACHER_MYC_TARGETS_UP	SCHUHMACHER_MYC_TARGETS_UP		74	0.390712	1.12632	0.339147	0.859866	1	3059	tags=38%, list=23%, signal=49%
BYSTRYKH_HEMATOPOIESIS_STEM_CELL_SCP2_QTL_TRANS	BYSTRYKH_HEMATOPOIESIS_STEM_CELL_SCP2_QTL_TRANS		19	0.416267	1.12532	0.30566	0.861392	1	1084	tags=21%, list=8%, signal=23%
REACTOME_ANTIGEN_PROCESSING_CROSS_PRESENTATION	REACTOME_ANTIGEN_PROCESSING_CROSS_PRESENTATION		71	0.348625	1.12442	0.349112	0.86248	1	3316	tags=42%, list=25%, signal=56%
KYNG_WERNER_SYNDROM_AND_NORMAL_AGING_DN	KYNG_WERNER_SYNDROM_AND_NORMAL_AGING_DN		184	0.275909	1.12426	0.233663	0.861254	1	2266	tags=27%, list=17%, signal=32%
ROYLANCE_BREAST_CANCER_16Q_COPY_NUMBER_UP	ROYLANCE_BREAST_CANCER_16Q_COPY_NUMBER_UP		36	0.372846	1.12403	0.330171	0.860202	1	2392	tags=31%, list=18%, signal=37%
XU_GH1_EXOGENOUS_TARGETS_DN	XU_GH1_EXOGENOUS_TARGETS_DN		94	0.292127	1.12395	0.251429	0.858669	1	1358	tags=15%, list=10%, signal=17%
HUMMEL_BURKITTS_LYMPHOMA_UP	HUMMEL_BURKITTS_LYMPHOMA_UP		39	0.378943	1.12306	0.301426	0.859765	1	957	tags=21%, list=7%, signal=22%
REACTOME_ARMS_MEDIATED_ACTIVATION	REACTOME_ARMS_MEDIATED_ACTIVATION		15	0.415721	1.12249	0.344622	0.859943	1	1161	tags=27%, list=9%, signal=29%
COLLIS_PRKDC_REGULATORS	COLLIS_PRKDC_REGULATORS		15	0.398359	1.12219	0.333984	0.859138	1	1998	tags=40%, list=15%, signal=47%
BIOCARTA_CERAMIDE_PATHWAY	BIOCARTA_CERAMIDE_PATHWAY		22	0.352259	1.12179	0.324376	0.858735	1	3667	tags=55%, list=28%, signal=76%
JIANG_HYPOXIA_NORMAL	JIANG_HYPOXIA_NORMAL		261	0.303179	1.12084	0.277666	0.860176	1	2679	tags=31%, list=21%, signal=38%
REACTOME_PKB_MEDIATED_EVENTS	REACTOME_PKB_MEDIATED_EVENTS		21	0.380382	1.12001	0.308316	0.861189	1	2181	tags=29%, list=17%, signal=34%
LEE_LIVER_CANCER_MYC_UP	LEE_LIVER_CANCER_MYC_UP		52	0.395117	1.12	0.25	0.85945	1	2134	tags=35%, list=16%, signal=41%
MASSARWEH_TAMOXIFEN_RESISTANCE_UP	MASSARWEH_TAMOXIFEN_RESISTANCE_UP		404	0.286139	1.11978	0.21881	0.858357	1	2541	tags=25%, list=19%, signal=31%
ROVERSI_GLIOMA_COPY_NUMBER_UP	ROVERSI_GLIOMA_COPY_NUMBER_UP		78	0.308174	1.11978	0.258252	0.856634	1	2621	tags=28%, list=20%, signal=35%
LIU_VMYB_TARGETS_UP	LIU_VMYB_TARGETS_UP		113	0.35039	1.11963	0.242915	0.855375	1	2038	tags=27%, list=16%, signal=32%
LIU_LIVER_CANCER	LIU_LIVER_CANCER		23	0.382249	1.11918	0.301556	0.855203	1	691	tags=13%, list=5%, signal=14%
PEART_HDAC_PROLIFERATION_CLUSTER_UP	PEART_HDAC_PROLIFERATION_CLUSTER_UP		52	0.35239	1.11811	0.292929	0.857046	1	2495	tags=37%, list=19%, signal=45%
BILD_SRC_ONCOGENIC_SIGNATURE	BILD_SRC_ONCOGENIC_SIGNATURE		50	0.350966	1.11808	0.280242	0.855405	1	2901	tags=34%, list=22%, signal=44%
REACTOME_FATTY_ACYL_COA_BIOSYNTHESIS	REACTOME_FATTY_ACYL_COA_BIOSYNTHESIS		15	0.527543	1.11687	0.358634	0.857687	1	3131	tags=53%, list=24%, signal=70%
NIKOLSKY_BREAST_CANCER_7Q21_Q22_AMPLICON	NIKOLSKY_BREAST_CANCER_7Q21_Q22_AMPLICON		52	0.390557	1.11682	0.30137	0.856146	1	1087	tags=23%, list=8%, signal=25%
KEGG_SPHINGOLIPID_METABOLISM	KEGG_SPHINGOLIPID_METABOLISM		28	0.374354	1.11556	0.304673	0.858431	1	1778	tags=32%, list=14%, signal=37%
BIOCARTA_CDMAC_PATHWAY	BIOCARTA_CDMAC_PATHWAY		15	0.426932	1.11408	0.340265	0.861829	1	3431	tags=47%, list=26%, signal=63%
KARLSSON_TGFB1_TARGETS_DN	KARLSSON_TGFB1_TARGETS_DN		165	0.301978	1.11376	0.300388	0.861199	1	2980	tags=33%, list=23%, signal=42%
REACTOME_NUCLEOTIDE_EXCISION_REPAIR	REACTOME_NUCLEOTIDE_EXCISION_REPAIR		47	0.363115	1.11023	0.357724	0.871176	1	2147	tags=32%, list=16%, signal=38%
STEGER_ADIPOGENESIS_UP	STEGER_ADIPOGENESIS_UP		21	0.462798	1.11022	0.326653	0.869467	1	3239	tags=57%, list=25%, signal=76%
HU_GENOTOXIN_ACTION_DIRECT_VS_INDIRECT_24HR	HU_GENOTOXIN_ACTION_DIRECT_VS_INDIRECT_24HR		42	0.317245	1.11006	0.300847	0.868268	1	2755	tags=33%, list=21%, signal=42%
AMIT_EGF_RESPONSE_480_MCF10A	AMIT_EGF_RESPONSE_480_MCF10A		41	0.384182	1.1099	0.293501	0.867099	1	2186	tags=29%, list=17%, signal=35%
SCHLOSSER_MYC_TARGETS_REPRESSED_BY_SERUM	SCHLOSSER_MYC_TARGETS_REPRESSED_BY_SERUM		140	0.33475	1.10971	0.350101	0.865966	1	3104	tags=36%, list=24%, signal=47%
SERVITJA_LIVER_HNF1A_TARGETS_UP	SERVITJA_LIVER_HNF1A_TARGETS_UP		105	0.393102	1.10943	0.278	0.865135	1	2208	tags=37%, list=17%, signal=44%
SILIGAN_TARGETS_OF_EWS_FLI1_FUSION_DN	SILIGAN_TARGETS_OF_EWS_FLI1_FUSION_DN		16	0.405029	1.10893	0.335498	0.865016	1	2358	tags=44%, list=18%, signal=53%
PURBEY_TARGETS_OF_CTBP1_AND_SATB1_DN	PURBEY_TARGETS_OF_CTBP1_AND_SATB1_DN		139	0.256228	1.10892	0.26087	0.86334	1	1760	tags=17%, list=14%, signal=20%
WATANABE_RECTAL_CANCER_RADIOTHERAPY_RESPONSIVE_UP	WATANABE_RECTAL_CANCER_RADIOTHERAPY_RESPONSIVE_UP		102	0.285138	1.10883	0.280534	0.861912	1	2877	tags=32%, list=22%, signal=41%
BIOCARTA_MITOCHONDRIA_PATHWAY	BIOCARTA_MITOCHONDRIA_PATHWAY		20	0.400776	1.10713	0.321839	0.865596	1	3664	tags=55%, list=28%, signal=76%
CHIBA_RESPONSE_TO_TSA	CHIBA_RESPONSE_TO_TSA		40	0.356675	1.10616	0.291985	0.867023	1	3895	tags=58%, list=30%, signal=82%
KEGG_PROXIMAL_TUBULE_BICARBONATE_RECLAMATION	KEGG_PROXIMAL_TUBULE_BICARBONATE_RECLAMATION		22	0.432917	1.10614	0.32948	0.865376	1	2060	tags=36%, list=16%, signal=43%
REACTOME_NEF_MEDIATES_DOWN_MODULATION_OF_CELL_SURFACE_RECEPTORS_BY_RECRUITING_THEM_TO_CLATHRIN_ADAPTERS	REACTOME_NEF_MEDIATES_DOWN_MODULATION_OF_CELL_SURFACE_RECEPTORS_BY_RECRUITING_THEM_TO_CLATHRIN_ADAPTERS		18	0.413887	1.10589	0.34749	0.864437	1	2756	tags=44%, list=21%, signal=56%
ST_P38_MAPK_PATHWAY	ST_P38_MAPK_PATHWAY		34	0.326814	1.10576	0.304082	0.863204	1	1967	tags=26%, list=15%, signal=31%
KEGG_MATURITY_ONSET_DIABETES_OF_THE_YOUNG	KEGG_MATURITY_ONSET_DIABETES_OF_THE_YOUNG		19	0.439681	1.10503	0.345833	0.86385	1	947	tags=16%, list=7%, signal=17%
KEGG_INSULIN_SIGNALING_PATHWAY	KEGG_INSULIN_SIGNALING_PATHWAY		127	0.281935	1.10062	0.302231	0.876743	1	1967	tags=20%, list=15%, signal=24%
BIOCARTA_CHREBP2_PATHWAY	BIOCARTA_CHREBP2_PATHWAY		39	0.355485	1.10045	0.315686	0.8756	1	3397	tags=46%, list=26%, signal=62%
HORTON_SREBF_TARGETS	HORTON_SREBF_TARGETS		22	0.552302	1.09944	0.404715	0.877281	1	3728	tags=68%, list=29%, signal=95%
DING_LUNG_CANCER_EXPRESSION_BY_COPY_NUMBER	DING_LUNG_CANCER_EXPRESSION_BY_COPY_NUMBER		83	0.340038	1.09924	0.319361	0.876259	1	3628	tags=48%, list=28%, signal=66%
PASQUALUCCI_LYMPHOMA_BY_GC_STAGE_UP	PASQUALUCCI_LYMPHOMA_BY_GC_STAGE_UP		209	0.286742	1.09874	0.251451	0.876222	1	2022	tags=23%, list=16%, signal=27%
KYNG_RESPONSE_TO_H2O2_VIA_ERCC6_UP	KYNG_RESPONSE_TO_H2O2_VIA_ERCC6_UP		37	0.359227	1.09828	0.3174	0.876033	1	2387	tags=35%, list=18%, signal=43%
MATTIOLI_MULTIPLE_MYELOMA_SUBGROUPS	MATTIOLI_MULTIPLE_MYELOMA_SUBGROUPS		16	0.52735	1.09786	0.359438	0.875709	1	4701	tags=69%, list=36%, signal=107%
REACTOME_TRANSMEMBRANE_TRANSPORT_OF_SMALL_MOLECULES	REACTOME_TRANSMEMBRANE_TRANSPORT_OF_SMALL_MOLECULES		336	0.264515	1.09714	0.25813	0.876422	1	2242	tags=21%, list=17%, signal=24%
KEGG_RNA_DEGRADATION	KEGG_RNA_DEGRADATION		43	0.345365	1.09547	0.323232	0.880233	1	2892	tags=37%, list=22%, signal=48%
MCBRYAN_PUBERTAL_BREAST_4_5WK_DN	MCBRYAN_PUBERTAL_BREAST_4_5WK_DN		158	0.308513	1.09315	0.307692	0.886076	1	3008	tags=36%, list=23%, signal=46%
KRIGE_AMINO_ACID_DEPRIVATION	KRIGE_AMINO_ACID_DEPRIVATION		28	0.428666	1.0931	0.354331	0.884574	1	2314	tags=39%, list=18%, signal=48%
BONOME_OVARIAN_CANCER_SURVIVAL_SUBOPTIMAL_DEBULKING	BONOME_OVARIAN_CANCER_SURVIVAL_SUBOPTIMAL_DEBULKING		453	0.255347	1.09271	0.281947	0.884182	1	2521	tags=25%, list=19%, signal=30%
REACTOME_RNA_POL_III_TRANSCRIPTION_INITIATION_FROM_TYPE_2_PROMOTER	REACTOME_RNA_POL_III_TRANSCRIPTION_INITIATION_FROM_TYPE_2_PROMOTER		20	0.395856	1.09221	0.369697	0.884151	1	2014	tags=35%, list=15%, signal=41%
JAERVINEN_AMPLIFIED_IN_LARYNGEAL_CANCER	JAERVINEN_AMPLIFIED_IN_LARYNGEAL_CANCER		33	0.333676	1.09181	0.325153	0.883781	1	2025	tags=24%, list=16%, signal=29%
ZEMBUTSU_SENSITIVITY_TO_CISPLATIN	ZEMBUTSU_SENSITIVITY_TO_CISPLATIN		16	0.433132	1.09156	0.350202	0.882901	1	2794	tags=31%, list=21%, signal=40%
JIANG_AGING_HYPOTHALAMUS_UP	JIANG_AGING_HYPOTHALAMUS_UP		43	0.310558	1.0905	0.331301	0.884565	1	3720	tags=47%, list=29%, signal=65%
REACTOME_ENDOSOMAL_SORTING_COMPLEX_REQUIRED_FOR_TRANSPORT_ESCRT	REACTOME_ENDOSOMAL_SORTING_COMPLEX_REQUIRED_FOR_TRANSPORT_ESCRT		18	0.399623	1.08957	0.372984	0.886025	1	2620	tags=39%, list=20%, signal=49%
ELVIDGE_HIF1A_AND_HIF2A_TARGETS_UP	ELVIDGE_HIF1A_AND_HIF2A_TARGETS_UP		41	0.370388	1.08931	0.326044	0.885196	1	1956	tags=27%, list=15%, signal=31%
WOOD_EBV_EBNA1_TARGETS_DN	WOOD_EBV_EBNA1_TARGETS_DN		45	0.37549	1.08804	0.338742	0.887604	1	2706	tags=42%, list=21%, signal=53%
XU_AKT1_TARGETS_6HR	XU_AKT1_TARGETS_6HR		24	0.465692	1.08748	0.356	0.887861	1	1839	tags=38%, list=14%, signal=44%
CHEN_NEUROBLASTOMA_COPY_NUMBER_GAINS	CHEN_NEUROBLASTOMA_COPY_NUMBER_GAINS		41	0.329445	1.08736	0.355513	0.886605	1	3543	tags=41%, list=27%, signal=57%
MISSIAGLIA_REGULATED_BY_METHYLATION_UP	MISSIAGLIA_REGULATED_BY_METHYLATION_UP		112	0.376761	1.08617	0.326996	0.888953	1	1815	tags=25%, list=14%, signal=29%
WANG_LMO4_TARGETS_UP	WANG_LMO4_TARGETS_UP		247	0.272769	1.08582	0.291581	0.888445	1	2331	tags=28%, list=18%, signal=34%
IWANAGA_CARCINOGENESIS_BY_KRAS_PTEN_UP	IWANAGA_CARCINOGENESIS_BY_KRAS_PTEN_UP		122	0.28449	1.08576	0.281376	0.886947	1	2244	tags=26%, list=17%, signal=31%
BARRIER_COLON_CANCER_RECURRENCE_DN	BARRIER_COLON_CANCER_RECURRENCE_DN		19	0.428997	1.0849	0.314453	0.888047	1	2587	tags=37%, list=20%, signal=46%
ALCALA_APOPTOSIS	ALCALA_APOPTOSIS		77	0.315573	1.08269	0.340909	0.893458	1	2890	tags=31%, list=22%, signal=40%
KOKKINAKIS_METHIONINE_DEPRIVATION_96HR_DN	KOKKINAKIS_METHIONINE_DEPRIVATION_96HR_DN		69	0.343551	1.08229	0.347222	0.893123	1	2442	tags=29%, list=19%, signal=35%
HOWLIN_CITED1_TARGETS_1_DN	HOWLIN_CITED1_TARGETS_1_DN		35	0.35284	1.08142	0.355102	0.894337	1	1461	tags=26%, list=11%, signal=29%
WALLACE_JAK2_TARGETS_UP	WALLACE_JAK2_TARGETS_UP		24	0.410624	1.08127	0.350195	0.893169	1	2155	tags=29%, list=17%, signal=35%
ZHOU_INFLAMMATORY_RESPONSE_LIVE_DN	ZHOU_INFLAMMATORY_RESPONSE_LIVE_DN		235	0.250649	1.08083	0.241803	0.893006	1	2724	tags=30%, list=21%, signal=37%
CHEOK_RESPONSE_TO_MERCAPTOPURINE_AND_HD_MTX_DN	CHEOK_RESPONSE_TO_MERCAPTOPURINE_AND_HD_MTX_DN		24	0.415243	1.08067	0.365904	0.891899	1	2642	tags=42%, list=20%, signal=52%
REACTOME_REGULATION_OF_BETA_CELL_DEVELOPMENT	REACTOME_REGULATION_OF_BETA_CELL_DEVELOPMENT		21	0.414863	1.08013	0.351812	0.892004	1	947	tags=14%, list=7%, signal=15%
GROSS_HIF1A_TARGETS_DN	GROSS_HIF1A_TARGETS_DN		21	0.419439	1.07957	0.333333	0.892243	1	4356	tags=67%, list=33%, signal=100%
REACTOME_NFKB_AND_MAP_KINASES_ACTIVATION_MEDIATED_BY_TLR4_SIGNALING_REPERTOIRE	REACTOME_NFKB_AND_MAP_KINASES_ACTIVATION_MEDIATED_BY_TLR4_SIGNALING_REPERTOIRE		64	0.312721	1.07909	0.322772	0.892177	1	3277	tags=34%, list=25%, signal=46%
GAZDA_DIAMOND_BLACKFAN_ANEMIA_ERYTHROID_UP	GAZDA_DIAMOND_BLACKFAN_ANEMIA_ERYTHROID_UP		21	0.395637	1.07754	0.348643	0.895519	1	1778	tags=33%, list=14%, signal=39%
BONOME_OVARIAN_CANCER_POOR_SURVIVAL_DN	BONOME_OVARIAN_CANCER_POOR_SURVIVAL_DN		18	0.36295	1.07737	0.35167	0.894471	1	535	tags=11%, list=4%, signal=12%
LANDIS_BREAST_CANCER_PROGRESSION_UP	LANDIS_BREAST_CANCER_PROGRESSION_UP		38	0.404489	1.07706	0.353175	0.893827	1	1725	tags=34%, list=13%, signal=39%
RUAN_RESPONSE_TO_TNF_TROGLITAZONE_UP	RUAN_RESPONSE_TO_TNF_TROGLITAZONE_UP		17	0.50635	1.0761	0.381238	0.895305	1	1871	tags=35%, list=14%, signal=41%
KOKKINAKIS_METHIONINE_DEPRIVATION_48HR_DN	KOKKINAKIS_METHIONINE_DEPRIVATION_48HR_DN		61	0.338739	1.07505	0.330059	0.897033	1	2442	tags=31%, list=19%, signal=38%
RUAN_RESPONSE_TO_TROGLITAZONE_UP	RUAN_RESPONSE_TO_TROGLITAZONE_UP		23	0.413587	1.0741	0.359438	0.898479	1	2281	tags=43%, list=18%, signal=53%
VANDESLUIS_COMMD1_TARGETS_GROUP_4_UP	VANDESLUIS_COMMD1_TARGETS_GROUP_4_UP		16	0.422019	1.07362	0.375	0.898337	1	2879	tags=44%, list=22%, signal=56%
TOOKER_GEMCITABINE_RESISTANCE_UP	TOOKER_GEMCITABINE_RESISTANCE_UP		73	0.332611	1.07305	0.346899	0.898605	1	2716	tags=36%, list=21%, signal=45%
PID_HEDGEHOG_GLI_PATHWAY	PID_HEDGEHOG_GLI_PATHWAY		42	0.277765	1.07253	0.348454	0.89871	1	3968	tags=38%, list=30%, signal=55%
SCHMIDT_POR_TARGETS_IN_LIMB_BUD_UP	SCHMIDT_POR_TARGETS_IN_LIMB_BUD_UP		22	0.517892	1.07129	0.428843	0.901052	1	2393	tags=41%, list=18%, signal=50%
TAKAO_RESPONSE_TO_UVB_RADIATION_DN	TAKAO_RESPONSE_TO_UVB_RADIATION_DN		91	0.301141	1.06933	0.368421	0.90578	1	4033	tags=49%, list=31%, signal=71%
YAGI_AML_RELAPSE_PROGNOSIS	YAGI_AML_RELAPSE_PROGNOSIS		31	0.356672	1.06918	0.382591	0.904689	1	3053	tags=35%, list=23%, signal=46%
EHLERS_ANEUPLOIDY_UP	EHLERS_ANEUPLOIDY_UP		32	0.353178	1.06849	0.353783	0.905243	1	1131	tags=19%, list=9%, signal=20%
ONKEN_UVEAL_MELANOMA_DN	ONKEN_UVEAL_MELANOMA_DN		482	0.287184	1.06828	0.332677	0.904305	1	2573	tags=27%, list=20%, signal=33%
PID_HIV_NEF_PATHWAY	PID_HIV_NEF_PATHWAY		35	0.32839	1.06813	0.353535	0.903203	1	1735	tags=26%, list=13%, signal=30%
FARDIN_HYPOXIA_11	FARDIN_HYPOXIA_11		25	0.416989	1.06622	0.358268	0.907673	1	2359	tags=32%, list=18%, signal=39%
ZHENG_RESPONSE_TO_ARSENITE_UP	ZHENG_RESPONSE_TO_ARSENITE_UP		16	0.537973	1.06477	0.429672	0.910823	1	2266	tags=50%, list=17%, signal=60%
ZHAN_MULTIPLE_MYELOMA_CD1_AND_CD2_UP	ZHAN_MULTIPLE_MYELOMA_CD1_AND_CD2_UP		57	0.340999	1.0642	0.355159	0.910969	1	2331	tags=30%, list=18%, signal=36%
DAVICIONI_MOLECULAR_ARMS_VS_ERMS_UP	DAVICIONI_MOLECULAR_ARMS_VS_ERMS_UP		289	0.267244	1.064	0.330059	0.909976	1	2232	tags=24%, list=17%, signal=29%
SHAFFER_IRF4_TARGETS_IN_ACTIVATED_B_LYMPHOCYTE	SHAFFER_IRF4_TARGETS_IN_ACTIVATED_B_LYMPHOCYTE		77	0.325778	1.06385	0.365079	0.908829	1	3289	tags=39%, list=25%, signal=52%
REACTOME_DNA_REPAIR	REACTOME_DNA_REPAIR		95	0.307479	1.06294	0.386831	0.910091	1	2147	tags=27%, list=16%, signal=33%
NAKAMURA_ADIPOGENESIS_EARLY_UP	NAKAMURA_ADIPOGENESIS_EARLY_UP		56	0.380554	1.06277	0.362934	0.909052	1	2247	tags=34%, list=17%, signal=41%
CREIGHTON_AKT1_SIGNALING_VIA_MTOR_UP	CREIGHTON_AKT1_SIGNALING_VIA_MTOR_UP		32	0.426717	1.06227	0.393195	0.909034	1	2096	tags=31%, list=16%, signal=37%
LEIN_CHOROID_PLEXUS_MARKERS	LEIN_CHOROID_PLEXUS_MARKERS		75	0.337396	1.06159	0.339731	0.909678	1	2388	tags=29%, list=18%, signal=36%
CHESLER_BRAIN_HIGHEST_GENETIC_VARIANCE	CHESLER_BRAIN_HIGHEST_GENETIC_VARIANCE		27	0.365401	1.06157	0.366803	0.908186	1	2041	tags=30%, list=16%, signal=35%
GALE_APL_WITH_FLT3_MUTATED_UP	GALE_APL_WITH_FLT3_MUTATED_UP		46	0.348323	1.06086	0.371069	0.908923	1	2210	tags=33%, list=17%, signal=39%
ROVERSI_GLIOMA_COPY_NUMBER_DN	ROVERSI_GLIOMA_COPY_NUMBER_DN		41	0.316465	1.06061	0.347992	0.908175	1	1324	tags=22%, list=10%, signal=24%
REACTOME_HIV_INFECTION	REACTOME_HIV_INFECTION		184	0.278538	1.06002	0.375746	0.90844	1	3388	tags=38%, list=26%, signal=51%
HELLER_SILENCED_BY_METHYLATION_DN	HELLER_SILENCED_BY_METHYLATION_DN		95	0.348464	1.05983	0.351923	0.907535	1	2405	tags=32%, list=18%, signal=38%
BILANGES_RAPAMYCIN_SENSITIVE_VIA_TSC1_AND_TSC2	BILANGES_RAPAMYCIN_SENSITIVE_VIA_TSC1_AND_TSC2		60	0.306038	1.05964	0.371648	0.906592	1	2831	tags=27%, list=22%, signal=34%
RICKMAN_HEAD_AND_NECK_CANCER_E	RICKMAN_HEAD_AND_NECK_CANCER_E		60	0.357575	1.05848	0.338	0.908841	1	993	tags=17%, list=8%, signal=18%
SHETH_LIVER_CANCER_VS_TXNIP_LOSS_PAM6	SHETH_LIVER_CANCER_VS_TXNIP_LOSS_PAM6		33	0.345641	1.05814	0.368098	0.908353	1	1987	tags=27%, list=15%, signal=32%
BOYAULT_LIVER_CANCER_SUBCLASS_G6_UP	BOYAULT_LIVER_CANCER_SUBCLASS_G6_UP		58	0.478101	1.05798	0.426471	0.907294	1	2597	tags=41%, list=20%, signal=51%
DOANE_BREAST_CANCER_ESR1_UP	DOANE_BREAST_CANCER_ESR1_UP		106	0.327044	1.05771	0.31185	0.906642	1	781	tags=17%, list=6%, signal=18%
REACTOME_GLYCEROPHOSPHOLIPID_BIOSYNTHESIS	REACTOME_GLYCEROPHOSPHOLIPID_BIOSYNTHESIS		53	0.324933	1.05762	0.380582	0.905322	1	1898	tags=25%, list=15%, signal=29%
DAIRKEE_CANCER_PRONE_RESPONSE_BPA	DAIRKEE_CANCER_PRONE_RESPONSE_BPA		45	0.336384	1.05723	0.374753	0.904962	1	2606	tags=36%, list=20%, signal=44%
STEARMAN_LUNG_CANCER_EARLY_VS_LATE_UP	STEARMAN_LUNG_CANCER_EARLY_VS_LATE_UP		99	0.306925	1.05633	0.358382	0.906287	1	2103	tags=24%, list=16%, signal=29%
GARY_CD5_TARGETS_DN	GARY_CD5_TARGETS_DN		327	0.315982	1.05571	0.401639	0.906773	1	3429	tags=38%, list=26%, signal=50%
QI_HYPOXIA	QI_HYPOXIA		108	0.337749	1.05558	0.359596	0.905649	1	1658	tags=25%, list=13%, signal=28%
FARMER_BREAST_CANCER_APOCRINE_VS_BASAL	FARMER_BREAST_CANCER_APOCRINE_VS_BASAL		296	0.300801	1.05436	0.335329	0.907948	1	1773	tags=23%, list=14%, signal=26%
BORCZUK_MALIGNANT_MESOTHELIOMA_UP	BORCZUK_MALIGNANT_MESOTHELIOMA_UP		274	0.340403	1.05364	0.40625	0.908703	1	3278	tags=42%, list=25%, signal=55%
CHEOK_RESPONSE_TO_MERCAPTOPURINE_AND_LD_MTX_DN	CHEOK_RESPONSE_TO_MERCAPTOPURINE_AND_LD_MTX_DN		15	0.392843	1.05343	0.397436	0.907805	1	2011	tags=27%, list=15%, signal=31%
DORMOY_ELAVL1_TARGETS	DORMOY_ELAVL1_TARGETS		16	0.457348	1.05182	0.400411	0.911493	1	625	tags=25%, list=5%, signal=26%
HUMMERICH_BENIGN_SKIN_TUMOR_UP	HUMMERICH_BENIGN_SKIN_TUMOR_UP		15	0.44949	1.05148	0.372587	0.911018	1	1800	tags=40%, list=14%, signal=46%
KEGG_NUCLEOTIDE_EXCISION_REPAIR	KEGG_NUCLEOTIDE_EXCISION_REPAIR		43	0.367325	1.05125	0.399598	0.91023	1	2861	tags=40%, list=22%, signal=50%
KIM_MYC_AMPLIFICATION_TARGETS_UP	KIM_MYC_AMPLIFICATION_TARGETS_UP		150	0.275217	1.05069	0.350101	0.91058	1	3132	tags=31%, list=24%, signal=41%
HASLINGER_B_CLL_WITH_17P13_DELETION	HASLINGER_B_CLL_WITH_17P13_DELETION		21	0.367041	1.05069	0.409804	0.909064	1	2319	tags=29%, list=18%, signal=35%
PROVENZANI_METASTASIS_DN	PROVENZANI_METASTASIS_DN		126	0.30918	1.05051	0.387283	0.908059	1	2490	tags=30%, list=19%, signal=37%
RODRIGUES_THYROID_CARCINOMA_ANAPLASTIC_DN	RODRIGUES_THYROID_CARCINOMA_ANAPLASTIC_DN		364	0.295611	1.04969	0.355691	0.909184	1	2696	tags=30%, list=21%, signal=36%
BRACHAT_RESPONSE_TO_CISPLATIN	BRACHAT_RESPONSE_TO_CISPLATIN		17	0.411375	1.04823	0.402415	0.912316	1	1471	tags=35%, list=11%, signal=40%
IWANAGA_CARCINOGENESIS_BY_KRAS_UP	IWANAGA_CARCINOGENESIS_BY_KRAS_UP		116	0.268784	1.04719	0.353635	0.914075	1	1743	tags=20%, list=13%, signal=23%
ZHU_CMV_24_HR_UP	ZHU_CMV_24_HR_UP		82	0.335797	1.04597	0.383721	0.91646	1	2249	tags=30%, list=17%, signal=37%
MAGRANGEAS_MULTIPLE_MYELOMA_IGLL_VS_IGLK_DN	MAGRANGEAS_MULTIPLE_MYELOMA_IGLL_VS_IGLK_DN		24	0.361032	1.04551	0.38716	0.916343	1	2359	tags=25%, list=18%, signal=30%
PID_ARF6_DOWNSTREAM_PATHWAY	PID_ARF6_DOWNSTREAM_PATHWAY		15	0.382523	1.0455	0.382524	0.914852	1	3170	tags=53%, list=24%, signal=70%
BIOCARTA_HIVNEF_PATHWAY	BIOCARTA_HIVNEF_PATHWAY		55	0.291538	1.04456	0.388	0.916381	1	942	tags=16%, list=7%, signal=18%
BIOCARTA_SPRY_PATHWAY	BIOCARTA_SPRY_PATHWAY		17	0.375034	1.04435	0.403101	0.915503	1	3671	tags=47%, list=28%, signal=65%
JIANG_HYPOXIA_CANCER	JIANG_HYPOXIA_CANCER		64	0.283243	1.04092	0.389864	0.924634	1	2285	tags=23%, list=18%, signal=28%
ABRAHAM_ALPC_VS_MULTIPLE_MYELOMA_DN	ABRAHAM_ALPC_VS_MULTIPLE_MYELOMA_DN		19	0.430787	1.04079	0.429389	0.92354	1	1809	tags=32%, list=14%, signal=37%
AGUIRRE_PANCREATIC_CANCER_COPY_NUMBER_UP	AGUIRRE_PANCREATIC_CANCER_COPY_NUMBER_UP		268	0.26765	1.04071	0.4	0.922276	1	2887	tags=28%, list=22%, signal=36%
DAUER_STAT3_TARGETS_DN	DAUER_STAT3_TARGETS_DN		48	0.461936	1.04065	0.42885	0.920933	1	1914	tags=29%, list=15%, signal=34%
ZEMBUTSU_SENSITIVITY_TO_VINBLASTINE	ZEMBUTSU_SENSITIVITY_TO_VINBLASTINE		16	0.391976	1.04006	0.405607	0.921331	1	3474	tags=56%, list=27%, signal=77%
HEIDENBLAD_AMPLICON_8Q24_DN	HEIDENBLAD_AMPLICON_8Q24_DN		31	0.320087	1.03953	0.414914	0.921463	1	2269	tags=32%, list=17%, signal=39%
MULLIGHAN_NPM1_MUTATED_SIGNATURE_1_UP	MULLIGHAN_NPM1_MUTATED_SIGNATURE_1_UP		244	0.22918	1.03838	0.380658	0.923646	1	2554	tags=24%, list=20%, signal=29%
TURASHVILI_BREAST_LOBULAR_CARCINOMA_VS_DUCTAL_NORMAL_DN	TURASHVILI_BREAST_LOBULAR_CARCINOMA_VS_DUCTAL_NORMAL_DN		70	0.347913	1.03763	0.40198	0.924605	1	1320	tags=23%, list=10%, signal=25%
KIM_MYCL1_AMPLIFICATION_TARGETS_DN	KIM_MYCL1_AMPLIFICATION_TARGETS_DN		15	0.410804	1.03697	0.407708	0.925241	1	1396	tags=33%, list=11%, signal=37%
REACTOME_NEUROTRANSMITTER_RELEASE_CYCLE	REACTOME_NEUROTRANSMITTER_RELEASE_CYCLE		31	0.353312	1.03661	0.4375	0.924959	1	1165	tags=16%, list=9%, signal=18%
BIOCARTA_TPO_PATHWAY	BIOCARTA_TPO_PATHWAY		23	0.359043	1.03645	0.42	0.92397	1	2513	tags=35%, list=19%, signal=43%
REACTOME_PIP3_ACTIVATES_AKT_SIGNALING	REACTOME_PIP3_ACTIVATES_AKT_SIGNALING		18	0.359458	1.03601	0.391732	0.923847	1	2515	tags=33%, list=19%, signal=41%
CAVARD_LIVER_CANCER_MALIGNANT_VS_BENIGN	CAVARD_LIVER_CANCER_MALIGNANT_VS_BENIGN		27	0.445433	1.03556	0.410714	0.923772	1	3269	tags=52%, list=25%, signal=69%
CHEMNITZ_RESPONSE_TO_PROSTAGLANDIN_E2_DN	CHEMNITZ_RESPONSE_TO_PROSTAGLANDIN_E2_DN		242	0.261858	1.03528	0.377282	0.923165	1	1561	tags=17%, list=12%, signal=19%
CREIGHTON_ENDOCRINE_THERAPY_RESISTANCE_5	CREIGHTON_ENDOCRINE_THERAPY_RESISTANCE_5		346	0.263048	1.03511	0.359768	0.922162	1	2024	tags=22%, list=16%, signal=25%
KRIEG_KDM3A_TARGETS_NOT_HYPOXIA	KRIEG_KDM3A_TARGETS_NOT_HYPOXIA		135	0.299736	1.03499	0.393004	0.921051	1	1850	tags=24%, list=14%, signal=28%
BREDEMEYER_RAG_SIGNALING_NOT_VIA_ATM_DN	BREDEMEYER_RAG_SIGNALING_NOT_VIA_ATM_DN		42	0.304712	1.03431	0.363636	0.92174	1	1536	tags=24%, list=12%, signal=27%
LIM_MAMMARY_LUMINAL_PROGENITOR_UP	LIM_MAMMARY_LUMINAL_PROGENITOR_UP		41	0.36817	1.03355	0.404382	0.922636	1	1350	tags=24%, list=10%, signal=27%
LI_ADIPOGENESIS_BY_ACTIVATED_PPARG	LI_ADIPOGENESIS_BY_ACTIVATED_PPARG		17	0.444276	1.03335	0.40625	0.92172	1	2845	tags=53%, list=22%, signal=68%
SUBTIL_PROGESTIN_TARGETS	SUBTIL_PROGESTIN_TARGETS		31	0.360836	1.0327	0.383158	0.922374	1	3246	tags=42%, list=25%, signal=56%
SPIRA_SMOKERS_LUNG_CANCER_UP	SPIRA_SMOKERS_LUNG_CANCER_UP		36	0.405082	1.03234	0.40404	0.922084	1	2188	tags=36%, list=17%, signal=43%
BANDRES_RESPONSE_TO_CARMUSTIN_MGMT_48HR_UP	BANDRES_RESPONSE_TO_CARMUSTIN_MGMT_48HR_UP		18	0.361442	1.03221	0.406	0.921039	1	200	tags=11%, list=2%, signal=11%
ENK_UV_RESPONSE_KERATINOCYTE_DN	ENK_UV_RESPONSE_KERATINOCYTE_DN		442	0.27657	1.03212	0.396728	0.919871	1	2468	tags=27%, list=19%, signal=32%
BROWNE_HCMV_INFECTION_1HR_DN	BROWNE_HCMV_INFECTION_1HR_DN		196	0.227374	1.03199	0.365657	0.918861	1	1166	tags=13%, list=9%, signal=14%
LABBE_WNT3A_TARGETS_DN	LABBE_WNT3A_TARGETS_DN		81	0.316288	1.03069	0.393814	0.92148	1	1880	tags=25%, list=14%, signal=29%
COLINA_TARGETS_OF_4EBP1_AND_4EBP2	COLINA_TARGETS_OF_4EBP1_AND_4EBP2		292	0.30489	1.02951	0.414683	0.923706	1	1553	tags=22%, list=12%, signal=25%
RAO_BOUND_BY_SALL4_ISOFORM_B	RAO_BOUND_BY_SALL4_ISOFORM_B		367	0.238751	1.02942	0.375758	0.922575	1	2607	tags=26%, list=20%, signal=32%
JOHANSSON_BRAIN_CANCER_EARLY_VS_LATE_DN	JOHANSSON_BRAIN_CANCER_EARLY_VS_LATE_DN		43	0.364543	1.02861	0.410822	0.923638	1	2362	tags=28%, list=18%, signal=34%
REACTOME_RNA_POL_III_TRANSCRIPTION_TERMINATION	REACTOME_RNA_POL_III_TRANSCRIPTION_TERMINATION		16	0.3913	1.02726	0.445122	0.926337	1	1892	tags=31%, list=15%, signal=37%
UEDA_CENTRAL_CLOCK	UEDA_CENTRAL_CLOCK		73	0.295724	1.02722	0.382046	0.925026	1	3895	tags=48%, list=30%, signal=68%
MOLENAAR_TARGETS_OF_CCND1_AND_CDK4_UP	MOLENAAR_TARGETS_OF_CCND1_AND_CDK4_UP		41	0.335702	1.02577	0.401575	0.928125	1	1675	tags=22%, list=13%, signal=25%
KEGG_RIG_I_LIKE_RECEPTOR_SIGNALING_PATHWAY	KEGG_RIG_I_LIKE_RECEPTOR_SIGNALING_PATHWAY		64	0.261802	1.02504	0.402321	0.928885	1	3697	tags=36%, list=28%, signal=50%
MENSE_HYPOXIA_UP	MENSE_HYPOXIA_UP		69	0.372216	1.02403	0.428866	0.930592	1	2394	tags=39%, list=18%, signal=48%
REACTOME_GLUCOSE_TRANSPORT	REACTOME_GLUCOSE_TRANSPORT		37	0.326386	1.0236	0.418947	0.930554	1	1842	tags=24%, list=14%, signal=28%
SANSOM_APC_TARGETS_DN	SANSOM_APC_TARGETS_DN		319	0.297243	1.02241	0.419417	0.932726	1	2168	tags=28%, list=17%, signal=32%
NOUSHMEHR_GBM_SILENCED_BY_METHYLATION	NOUSHMEHR_GBM_SILENCED_BY_METHYLATION		35	0.376254	1.02236	0.399621	0.931389	1	2011	tags=31%, list=15%, signal=37%
REACTOME_INCRETIN_SYNTHESIS_SECRETION_AND_INACTIVATION	REACTOME_INCRETIN_SYNTHESIS_SECRETION_AND_INACTIVATION		17	0.372004	1.02159	0.414013	0.932402	1	1769	tags=18%, list=14%, signal=20%
VANOEVELEN_MYOGENESIS_SIN3A_TARGETS	VANOEVELEN_MYOGENESIS_SIN3A_TARGETS		159	0.256403	1.02048	0.418468	0.934452	1	3582	tags=37%, list=27%, signal=51%
CHESLER_BRAIN_HIGHEST_EXPRESSION	CHESLER_BRAIN_HIGHEST_EXPRESSION		33	0.319527	1.01979	0.426641	0.935179	1	2633	tags=27%, list=20%, signal=34%
SETLUR_PROSTATE_CANCER_TMPRSS2_ERG_FUSION_UP	SETLUR_PROSTATE_CANCER_TMPRSS2_ERG_FUSION_UP		61	0.297813	1.01757	0.4	0.940646	1	1468	tags=20%, list=11%, signal=22%
ZHAN_MULTIPLE_MYELOMA_SUBGROUPS	ZHAN_MULTIPLE_MYELOMA_SUBGROUPS		30	0.354833	1.01732	0.460474	0.939995	1	3361	tags=43%, list=26%, signal=58%
YAO_TEMPORAL_RESPONSE_TO_PROGESTERONE_CLUSTER_12	YAO_TEMPORAL_RESPONSE_TO_PROGESTERONE_CLUSTER_12		69	0.298899	1.01665	0.403614	0.940571	1	2661	tags=33%, list=20%, signal=42%
HOLLEMAN_PREDNISOLONE_RESISTANCE_B_ALL_UP	HOLLEMAN_PREDNISOLONE_RESISTANCE_B_ALL_UP		20	0.359002	1.01645	0.420202	0.939756	1	3445	tags=35%, list=26%, signal=48%
JIANG_AGING_HYPOTHALAMUS_DN	JIANG_AGING_HYPOTHALAMUS_DN		39	0.317777	1.01636	0.43021	0.938612	1	3588	tags=38%, list=28%, signal=53%
PID_MTOR_4PATHWAY	PID_MTOR_4PATHWAY		57	0.300006	1.01617	0.412916	0.93779	1	3170	tags=39%, list=24%, signal=51%
ZWANG_EGF_PERSISTENTLY_DN	ZWANG_EGF_PERSISTENTLY_DN		40	0.314522	1.0153	0.42126	0.939001	1	1797	tags=28%, list=14%, signal=32%
DITTMER_PTHLH_TARGETS_UP	DITTMER_PTHLH_TARGETS_UP		100	0.303452	1.01411	0.4375	0.941079	1	2918	tags=38%, list=22%, signal=49%
BROWNE_HCMV_INFECTION_18HR_UP	BROWNE_HCMV_INFECTION_18HR_UP		167	0.276268	1.01201	0.4334	0.946163	1	2465	tags=27%, list=19%, signal=33%
BREDEMEYER_RAG_SIGNALING_VIA_ATM_NOT_VIA_NFKB_UP	BREDEMEYER_RAG_SIGNALING_VIA_ATM_NOT_VIA_NFKB_UP		28	0.353476	1.01158	0.437882	0.946048	1	1107	tags=21%, list=8%, signal=23%
CAFFAREL_RESPONSE_TO_THC_UP	CAFFAREL_RESPONSE_TO_THC_UP		26	0.337887	1.01124	0.429719	0.945616	1	2410	tags=35%, list=18%, signal=42%
BENPORATH_MYC_TARGETS_WITH_EBOX	BENPORATH_MYC_TARGETS_WITH_EBOX		211	0.244721	1.01097	0.447014	0.945034	1	1324	tags=13%, list=10%, signal=15%
MAHAJAN_RESPONSE_TO_IL1A_DN	MAHAJAN_RESPONSE_TO_IL1A_DN		72	0.292085	1.00895	0.442656	0.949708	1	2659	tags=29%, list=20%, signal=36%
SCHEIDEREIT_IKK_INTERACTING_PROTEINS	SCHEIDEREIT_IKK_INTERACTING_PROTEINS		53	0.283986	1.00871	0.440546	0.949032	1	1809	tags=19%, list=14%, signal=22%
CHO_NR4A1_TARGETS	CHO_NR4A1_TARGETS		27	0.349622	1.00738	0.427435	0.951689	1	2314	tags=26%, list=18%, signal=31%
BRUECKNER_TARGETS_OF_MIRLET7A3_UP	BRUECKNER_TARGETS_OF_MIRLET7A3_UP		88	0.327472	1.00721	0.448485	0.950789	1	1725	tags=24%, list=13%, signal=27%
SCHAEFFER_PROSTATE_DEVELOPMENT_48HR_UP	SCHAEFFER_PROSTATE_DEVELOPMENT_48HR_UP		343	0.285236	1.00706	0.433735	0.949855	1	2130	tags=23%, list=16%, signal=26%
TIEN_INTESTINE_PROBIOTICS_6HR_DN	TIEN_INTESTINE_PROBIOTICS_6HR_DN		146	0.294953	1.00634	0.428866	0.950691	1	3480	tags=42%, list=27%, signal=57%
KEGG_PYRIMIDINE_METABOLISM	KEGG_PYRIMIDINE_METABOLISM		74	0.321191	1.00599	0.451807	0.950271	1	2442	tags=26%, list=19%, signal=31%
WAKASUGI_HAVE_ZNF143_BINDING_SITES	WAKASUGI_HAVE_ZNF143_BINDING_SITES		51	0.332267	1.00558	0.466942	0.950101	1	3706	tags=41%, list=28%, signal=57%
REACTOME_TRIF_MEDIATED_TLR3_SIGNALING	REACTOME_TRIF_MEDIATED_TLR3_SIGNALING		66	0.278397	1.00527	0.435203	0.949676	1	3277	tags=33%, list=25%, signal=44%
CHARAFE_BREAST_CANCER_LUMINAL_VS_MESENCHYMAL_UP	CHARAFE_BREAST_CANCER_LUMINAL_VS_MESENCHYMAL_UP		317	0.298898	1.00525	0.434343	0.948279	1	2315	tags=24%, list=18%, signal=29%
SHEDDEN_LUNG_CANCER_GOOD_SURVIVAL_A5	SHEDDEN_LUNG_CANCER_GOOD_SURVIVAL_A5		58	0.321513	1.00499	0.419802	0.947662	1	2679	tags=28%, list=21%, signal=35%
PID_PS1_PATHWAY	PID_PS1_PATHWAY		38	0.338528	1.00475	0.429703	0.946954	1	1769	tags=24%, list=14%, signal=27%
PID_ANGIOPOIETIN_RECEPTOR_PATHWAY	PID_ANGIOPOIETIN_RECEPTOR_PATHWAY		49	0.283323	1.00286	0.45057	0.95148	1	1914	tags=20%, list=15%, signal=24%
FAELT_B_CLL_WITH_VH3_21_DN	FAELT_B_CLL_WITH_VH3_21_DN		47	0.312052	1.00272	0.435583	0.950467	1	2706	tags=36%, list=21%, signal=45%
BIOCARTA_VEGF_PATHWAY	BIOCARTA_VEGF_PATHWAY		28	0.313582	1.00261	0.46	0.94942	1	2345	tags=29%, list=18%, signal=35%
DEN_INTERACT_WITH_LCA5	DEN_INTERACT_WITH_LCA5		23	0.389561	1.00243	0.477407	0.948608	1	3124	tags=35%, list=24%, signal=46%
TSENG_IRS1_TARGETS_DN	TSENG_IRS1_TARGETS_DN		115	0.279326	1.00072	0.442	0.952359	1	1893	tags=21%, list=15%, signal=24%
GREGORY_SYNTHETIC_LETHAL_WITH_IMATINIB	GREGORY_SYNTHETIC_LETHAL_WITH_IMATINIB		123	0.24994	1.00061	0.431034	0.951282	1	2175	tags=23%, list=17%, signal=27%
OUELLET_OVARIAN_CANCER_INVASIVE_VS_LMP_UP	OUELLET_OVARIAN_CANCER_INVASIVE_VS_LMP_UP		108	0.313414	0.999877	0.454183	0.952072	1	3153	tags=44%, list=24%, signal=57%
GINESTIER_BREAST_CANCER_20Q13_AMPLIFICATION_UP	GINESTIER_BREAST_CANCER_20Q13_AMPLIFICATION_UP		79	0.285819	0.999396	0.465021	0.952124	1	2582	tags=27%, list=20%, signal=33%
MOHANKUMAR_TLX1_TARGETS_UP	MOHANKUMAR_TLX1_TARGETS_UP		344	0.260618	0.998849	0.455969	0.952443	1	2324	tags=25%, list=18%, signal=30%
REACTOME_APOPTOTIC_CLEAVAGE_OF_CELLULAR_PROTEINS	REACTOME_APOPTOTIC_CLEAVAGE_OF_CELLULAR_PROTEINS		34	0.344815	0.998643	0.448692	0.951642	1	670	tags=15%, list=5%, signal=15%
PUIFFE_INVASION_INHIBITED_BY_ASCITES_DN	PUIFFE_INVASION_INHIBITED_BY_ASCITES_DN		127	0.294947	0.998639	0.477707	0.950256	1	2490	tags=31%, list=19%, signal=39%
ZEMBUTSU_SENSITIVITY_TO_MITOMYCIN	ZEMBUTSU_SENSITIVITY_TO_MITOMYCIN		15	0.414702	0.998617	0.449799	0.948924	1	1187	tags=27%, list=9%, signal=29%
WIKMAN_ASBESTOS_LUNG_CANCER_UP	WIKMAN_ASBESTOS_LUNG_CANCER_UP		17	0.385369	0.998568	0.454167	0.947707	1	2505	tags=41%, list=19%, signal=51%
HEIDENBLAD_AMPLICON_8Q24_UP	HEIDENBLAD_AMPLICON_8Q24_UP		25	0.356232	0.9982	0.46	0.947467	1	1968	tags=24%, list=15%, signal=28%
MCCABE_HOXC6_TARGETS_CANCER_UP	MCCABE_HOXC6_TARGETS_CANCER_UP		23	0.33447	0.997846	0.452107	0.947114	1	844	tags=13%, list=6%, signal=14%
BHAT_ESR1_TARGETS_VIA_AKT1_DN	BHAT_ESR1_TARGETS_VIA_AKT1_DN		63	0.296459	0.997724	0.442	0.946124	1	1968	tags=19%, list=15%, signal=22%
LASTOWSKA_NEUROBLASTOMA_COPY_NUMBER_UP	LASTOWSKA_NEUROBLASTOMA_COPY_NUMBER_UP		119	0.274317	0.997003	0.444668	0.946952	1	2397	tags=24%, list=18%, signal=29%
YAGI_AML_SURVIVAL	YAGI_AML_SURVIVAL		110	0.249237	0.996554	0.454	0.946965	1	2549	tags=25%, list=20%, signal=30%
CHOI_ATL_CHRONIC_VS_ACUTE_DN	CHOI_ATL_CHRONIC_VS_ACUTE_DN		17	0.340594	0.996546	0.464567	0.945611	1	3851	tags=53%, list=30%, signal=75%
BERENJENO_ROCK_SIGNALING_NOT_VIA_RHOA_UP	BERENJENO_ROCK_SIGNALING_NOT_VIA_RHOA_UP		26	0.366896	0.995469	0.456389	0.947525	1	2085	tags=27%, list=16%, signal=32%
PID_RET_PATHWAY	PID_RET_PATHWAY		36	0.279202	0.995377	0.460905	0.946435	1	3170	tags=31%, list=24%, signal=40%
PID_S1P_S1P2_PATHWAY	PID_S1P_S1P2_PATHWAY		23	0.321209	0.995308	0.46748	0.945256	1	3170	tags=39%, list=24%, signal=52%
ONGUSAHA_TP53_TARGETS	ONGUSAHA_TP53_TARGETS		33	0.348101	0.994993	0.478175	0.944818	1	2237	tags=33%, list=17%, signal=40%
BIOCARTA_CCR3_PATHWAY	BIOCARTA_CCR3_PATHWAY		22	0.289052	0.994022	0.480315	0.946342	1	3170	tags=41%, list=24%, signal=54%
FORTSCHEGGER_PHF8_TARGETS_UP	FORTSCHEGGER_PHF8_TARGETS_UP		189	0.275056	0.993538	0.433925	0.946407	1	2558	tags=29%, list=20%, signal=36%
TAKADA_GASTRIC_CANCER_COPY_NUMBER_DN	TAKADA_GASTRIC_CANCER_COPY_NUMBER_DN		19	0.385706	0.993489	0.48008	0.945224	1	2239	tags=26%, list=17%, signal=32%
ZHAN_MULTIPLE_MYELOMA_CD1_VS_CD2_DN	ZHAN_MULTIPLE_MYELOMA_CD1_VS_CD2_DN		37	0.323847	0.992806	0.449393	0.945907	1	795	tags=16%, list=6%, signal=17%
REACTOME_BOTULINUM_NEUROTOXICITY	REACTOME_BOTULINUM_NEUROTOXICITY		16	0.384132	0.992358	0.471058	0.945885	1	3424	tags=44%, list=26%, signal=59%
YIH_RESPONSE_TO_ARSENITE_C4	YIH_RESPONSE_TO_ARSENITE_C4		18	0.317382	0.991431	0.464583	0.947366	1	1955	tags=17%, list=15%, signal=20%
TORCHIA_TARGETS_OF_EWSR1_FLI1_FUSION_TOP20_UP	TORCHIA_TARGETS_OF_EWSR1_FLI1_FUSION_TOP20_UP		17	0.385335	0.990876	0.48622	0.947696	1	2571	tags=35%, list=20%, signal=44%
GAUSSMANN_MLL_AF4_FUSION_TARGETS_F_DN	GAUSSMANN_MLL_AF4_FUSION_TARGETS_F_DN		27	0.383948	0.990782	0.487854	0.946659	1	2149	tags=30%, list=16%, signal=35%
ZWANG_EGF_INTERVAL_DN	ZWANG_EGF_INTERVAL_DN		137	0.290195	0.990737	0.457661	0.945435	1	2421	tags=26%, list=19%, signal=31%
MODY_HIPPOCAMPUS_POSTNATAL	MODY_HIPPOCAMPUS_POSTNATAL		61	0.302603	0.990557	0.480237	0.944652	1	2087	tags=23%, list=16%, signal=27%
GRATIAS_RETINOBLASTOMA_16Q24	GRATIAS_RETINOBLASTOMA_16Q24		16	0.441327	0.990553	0.484791	0.943323	1	2028	tags=38%, list=16%, signal=44%
MASSARWEH_RESPONSE_TO_ESTRADIOL	MASSARWEH_RESPONSE_TO_ESTRADIOL		55	0.313997	0.988968	0.466258	0.946944	1	877	tags=16%, list=7%, signal=17%
ZHANG_RESPONSE_TO_CANTHARIDIN_DN	ZHANG_RESPONSE_TO_CANTHARIDIN_DN		60	0.320881	0.988878	0.45	0.945878	1	3219	tags=38%, list=25%, signal=51%
LU_EZH2_TARGETS_UP	LU_EZH2_TARGETS_UP		182	0.26656	0.988786	0.469548	0.944801	1	3384	tags=39%, list=26%, signal=52%
REACTOME_IRON_UPTAKE_AND_TRANSPORT	REACTOME_IRON_UPTAKE_AND_TRANSPORT		29	0.340361	0.98863	0.466801	0.943914	1	2836	tags=45%, list=22%, signal=57%
BIOCARTA_EIF4_PATHWAY	BIOCARTA_EIF4_PATHWAY		22	0.337047	0.988344	0.465887	0.94348	1	1967	tags=27%, list=15%, signal=32%
WEIGEL_OXIDATIVE_STRESS_BY_HNE_AND_TBH	WEIGEL_OXIDATIVE_STRESS_BY_HNE_AND_TBH		56	0.279731	0.98771	0.488889	0.94411	1	1782	tags=21%, list=14%, signal=25%
MULLIGHAN_MLL_SIGNATURE_1_UP	MULLIGHAN_MLL_SIGNATURE_1_UP		350	0.250835	0.987339	0.46184	0.943887	1	2400	tags=25%, list=18%, signal=30%
KEGG_PURINE_METABOLISM	KEGG_PURINE_METABOLISM		131	0.235137	0.986536	0.482213	0.944954	1	2496	tags=21%, list=19%, signal=26%
KEGG_BASE_EXCISION_REPAIR	KEGG_BASE_EXCISION_REPAIR		31	0.368414	0.986194	0.5	0.94463	1	2983	tags=35%, list=23%, signal=46%
CAMPS_COLON_CANCER_COPY_NUMBER_DN	CAMPS_COLON_CANCER_COPY_NUMBER_DN		35	0.350951	0.984904	0.478788	0.947023	1	2762	tags=34%, list=21%, signal=43%
YAO_TEMPORAL_RESPONSE_TO_PROGESTERONE_CLUSTER_11	YAO_TEMPORAL_RESPONSE_TO_PROGESTERONE_CLUSTER_11		79	0.296043	0.983382	0.474308	0.950396	1	2671	tags=30%, list=20%, signal=38%
KEGG_ONE_CARBON_POOL_BY_FOLATE	KEGG_ONE_CARBON_POOL_BY_FOLATE		15	0.392867	0.982723	0.466667	0.951068	1	1840	tags=40%, list=14%, signal=47%
BIOCARTA_HSP27_PATHWAY	BIOCARTA_HSP27_PATHWAY		15	0.342349	0.982232	0.476285	0.951233	1	2267	tags=27%, list=17%, signal=32%
ZHONG_SECRETOME_OF_LUNG_CANCER_AND_FIBROBLAST	ZHONG_SECRETOME_OF_LUNG_CANCER_AND_FIBROBLAST		126	0.279693	0.982148	0.480226	0.950161	1	2971	tags=36%, list=23%, signal=46%
NIKOLSKY_BREAST_CANCER_8P12_P11_AMPLICON	NIKOLSKY_BREAST_CANCER_8P12_P11_AMPLICON		38	0.357841	0.981903	0.475538	0.94958	1	2074	tags=26%, list=16%, signal=31%
JOHNSTONE_PARVB_TARGETS_2_DN	JOHNSTONE_PARVB_TARGETS_2_DN		251	0.279333	0.981854	0.47379	0.948419	1	3039	tags=32%, list=23%, signal=41%
JEON_SMAD6_TARGETS_DN	JEON_SMAD6_TARGETS_DN		18	0.443643	0.981159	0.507634	0.94922	1	1955	tags=39%, list=15%, signal=46%
CERVERA_SDHB_TARGETS_1_DN	CERVERA_SDHB_TARGETS_1_DN		30	0.42951	0.981159	0.490079	0.947905	1	954	tags=30%, list=7%, signal=32%
MACAEVA_PBMC_RESPONSE_TO_IR	MACAEVA_PBMC_RESPONSE_TO_IR		70	0.286833	0.981035	0.471042	0.94702	1	2811	tags=31%, list=22%, signal=40%
PID_DNA_PK_PATHWAY	PID_DNA_PK_PATHWAY		15	0.372821	0.980917	0.491054	0.946036	1	1850	tags=33%, list=14%, signal=39%
ST_JNK_MAPK_PATHWAY	ST_JNK_MAPK_PATHWAY		38	0.283536	0.98033	0.478528	0.946501	1	1185	tags=18%, list=9%, signal=20%
BIOCARTA_TGFB_PATHWAY	BIOCARTA_TGFB_PATHWAY		18	0.374866	0.979537	0.467308	0.947527	1	1161	tags=22%, list=9%, signal=24%
ENK_UV_RESPONSE_EPIDERMIS_DN	ENK_UV_RESPONSE_EPIDERMIS_DN		479	0.26688	0.97927	0.484909	0.947006	1	2682	tags=28%, list=21%, signal=34%
MARTINEZ_RB1_AND_TP53_TARGETS_UP	MARTINEZ_RB1_AND_TP53_TARGETS_UP		484	0.242087	0.979136	0.465483	0.946057	1	2633	tags=26%, list=20%, signal=31%
CHANG_CORE_SERUM_RESPONSE_UP	CHANG_CORE_SERUM_RESPONSE_UP		167	0.293995	0.978763	0.476954	0.945908	1	2145	tags=25%, list=16%, signal=29%
REACTOME_CELL_CYCLE_CHECKPOINTS	REACTOME_CELL_CYCLE_CHECKPOINTS		94	0.363157	0.978708	0.505929	0.944767	1	3319	tags=46%, list=25%, signal=61%
BAELDE_DIABETIC_NEPHROPATHY_UP	BAELDE_DIABETIC_NEPHROPATHY_UP		80	0.349963	0.978538	0.467925	0.943996	1	1759	tags=23%, list=13%, signal=26%
SMITH_TERT_TARGETS_UP	SMITH_TERT_TARGETS_UP		134	0.278417	0.978381	0.476091	0.943161	1	3094	tags=40%, list=24%, signal=51%
MMS_MOUSE_LYMPH_HIGH_4HRS_UP	MMS_MOUSE_LYMPH_HIGH_4HRS_UP		31	0.375602	0.978336	0.492	0.941991	1	2266	tags=32%, list=17%, signal=39%
FERNANDEZ_BOUND_BY_MYC	FERNANDEZ_BOUND_BY_MYC		176	0.242667	0.978098	0.494253	0.941411	1	1324	tags=14%, list=10%, signal=16%
LEE_CALORIE_RESTRICTION_MUSCLE_DN	LEE_CALORIE_RESTRICTION_MUSCLE_DN		49	0.289819	0.977851	0.492958	0.940834	1	2178	tags=24%, list=17%, signal=29%
GAZDA_DIAMOND_BLACKFAN_ANEMIA_ERYTHROID_DN	GAZDA_DIAMOND_BLACKFAN_ANEMIA_ERYTHROID_DN		419	0.222456	0.976262	0.54088	0.944277	1	2069	tags=19%, list=16%, signal=21%
YIH_RESPONSE_TO_ARSENITE_C3	YIH_RESPONSE_TO_ARSENITE_C3		33	0.288904	0.976206	0.488889	0.943158	1	1651	tags=18%, list=13%, signal=21%
DANG_REGULATED_BY_MYC_UP	DANG_REGULATED_BY_MYC_UP		62	0.313615	0.973275	0.493014	0.950583	1	3219	tags=34%, list=25%, signal=45%
REACTOME_TRAFFICKING_OF_AMPA_RECEPTORS	REACTOME_TRAFFICKING_OF_AMPA_RECEPTORS		24	0.276587	0.972715	0.480315	0.950991	1	3465	tags=29%, list=27%, signal=40%
BIOCARTA_TFF_PATHWAY	BIOCARTA_TFF_PATHWAY		21	0.317422	0.972524	0.491429	0.950314	1	3170	tags=48%, list=24%, signal=63%
BIOCARTA_PYK2_PATHWAY	BIOCARTA_PYK2_PATHWAY		26	0.278236	0.972229	0.486692	0.949889	1	3170	tags=31%, list=24%, signal=41%
LASTOWSKA_COAMPLIFIED_WITH_MYCN	LASTOWSKA_COAMPLIFIED_WITH_MYCN		31	0.287895	0.972102	0.507692	0.948984	1	3662	tags=39%, list=28%, signal=54%
NAKAYAMA_SOFT_TISSUE_TUMORS_PCA2_DN	NAKAYAMA_SOFT_TISSUE_TUMORS_PCA2_DN		76	0.388962	0.971014	0.476861	0.950815	1	2281	tags=36%, list=18%, signal=43%
SHAFFER_IRF4_TARGETS_IN_PLASMA_CELL_VS_MATURE_B_LYMPHOCYTE	SHAFFER_IRF4_TARGETS_IN_PLASMA_CELL_VS_MATURE_B_LYMPHOCYTE		65	0.318223	0.970675	0.49692	0.950582	1	2090	tags=28%, list=16%, signal=33%
KEGG_GLYCEROPHOSPHOLIPID_METABOLISM	KEGG_GLYCEROPHOSPHOLIPID_METABOLISM		57	0.257407	0.969744	0.47451	0.952074	1	821	tags=12%, list=6%, signal=13%
SCHAEFFER_PROSTATE_DEVELOPMENT_AND_CANCER_BOX4_DN	SCHAEFFER_PROSTATE_DEVELOPMENT_AND_CANCER_BOX4_DN		23	0.359325	0.969677	0.498047	0.950994	1	1726	tags=26%, list=13%, signal=30%
DAVICIONI_PAX_FOXO1_SIGNATURE_IN_ARMS_UP	DAVICIONI_PAX_FOXO1_SIGNATURE_IN_ARMS_UP		53	0.289725	0.969239	0.495238	0.951021	1	1756	tags=23%, list=13%, signal=26%
RHEIN_ALL_GLUCOCORTICOID_THERAPY_DN	RHEIN_ALL_GLUCOCORTICOID_THERAPY_DN		341	0.296799	0.969065	0.482283	0.950265	1	2877	tags=32%, list=22%, signal=40%
MEINHOLD_OVARIAN_CANCER_LOW_GRADE_UP	MEINHOLD_OVARIAN_CANCER_LOW_GRADE_UP		16	0.397092	0.968606	0.501048	0.950372	1	2025	tags=31%, list=16%, signal=37%
LINSLEY_MIR16_TARGETS	LINSLEY_MIR16_TARGETS		153	0.243624	0.968543	0.498998	0.949293	1	1957	tags=20%, list=15%, signal=24%
MAEKAWA_ATF2_TARGETS	MAEKAWA_ATF2_TARGETS		19	0.338438	0.968185	0.485656	0.94915	1	2858	tags=37%, list=22%, signal=47%
LANDIS_ERBB2_BREAST_TUMORS_65_DN	LANDIS_ERBB2_BREAST_TUMORS_65_DN		34	0.388448	0.96746	0.508265	0.949964	1	2103	tags=38%, list=16%, signal=45%
KEGG_VIBRIO_CHOLERAE_INFECTION	KEGG_VIBRIO_CHOLERAE_INFECTION		49	0.266889	0.967077	0.501859	0.949749	1	2836	tags=29%, list=22%, signal=36%
BAKKER_FOXO3_TARGETS_UP	BAKKER_FOXO3_TARGETS_UP		44	0.310871	0.96686	0.497967	0.949074	1	2299	tags=27%, list=18%, signal=33%
PID_NFKAPPAB_CANONICAL_PATHWAY	PID_NFKAPPAB_CANONICAL_PATHWAY		22	0.311633	0.966428	0.5	0.949153	1	4526	tags=50%, list=35%, signal=76%
REACTOME_ACTIVATED_TLR4_SIGNALLING	REACTOME_ACTIVATED_TLR4_SIGNALLING		82	0.268134	0.966146	0.497065	0.94874	1	2739	tags=27%, list=21%, signal=34%
SMID_BREAST_CANCER_RELAPSE_IN_PLEURA_DN	SMID_BREAST_CANCER_RELAPSE_IN_PLEURA_DN		26	0.407256	0.96564	0.511952	0.948874	1	699	tags=19%, list=5%, signal=20%
BIOCARTA_CHEMICAL_PATHWAY	BIOCARTA_CHEMICAL_PATHWAY		21	0.321238	0.965548	0.508806	0.947876	1	2515	tags=33%, list=19%, signal=41%
GRAESSMANN_RESPONSE_TO_MC_AND_SERUM_DEPRIVATION_DN	GRAESSMANN_RESPONSE_TO_MC_AND_SERUM_DEPRIVATION_DN		67	0.274879	0.965265	0.519038	0.947379	1	1967	tags=25%, list=15%, signal=30%
YAO_TEMPORAL_RESPONSE_TO_PROGESTERONE_CLUSTER_8	YAO_TEMPORAL_RESPONSE_TO_PROGESTERONE_CLUSTER_8		42	0.336386	0.964924	0.498016	0.947126	1	2250	tags=31%, list=17%, signal=37%
MIKKELSEN_IPS_LCP_WITH_H3K4ME3	MIKKELSEN_IPS_LCP_WITH_H3K4ME3		103	0.285844	0.964718	0.48866	0.946444	1	1667	tags=20%, list=13%, signal=23%
PID_TRKR_PATHWAY	PID_TRKR_PATHWAY		59	0.258498	0.964443	0.519084	0.945991	1	3671	tags=37%, list=28%, signal=52%
JAZAG_TGFB1_SIGNALING_VIA_SMAD4_UP	JAZAG_TGFB1_SIGNALING_VIA_SMAD4_UP		93	0.249109	0.963916	0.50497	0.946266	1	1045	tags=13%, list=8%, signal=14%
REACTOME_INTEGRATION_OF_ENERGY_METABOLISM	REACTOME_INTEGRATION_OF_ENERGY_METABOLISM		106	0.256046	0.96288	0.529897	0.948166	1	2968	tags=29%, list=23%, signal=38%
BIOCARTA_EGF_PATHWAY	BIOCARTA_EGF_PATHWAY		30	0.311266	0.962597	0.511111	0.947765	1	2396	tags=30%, list=18%, signal=37%
SWEET_KRAS_ONCOGENIC_SIGNATURE	SWEET_KRAS_ONCOGENIC_SIGNATURE		83	0.299485	0.962245	0.492723	0.947531	1	661	tags=13%, list=5%, signal=14%
BOHN_PRIMARY_IMMUNODEFICIENCY_SYNDROM_UP	BOHN_PRIMARY_IMMUNODEFICIENCY_SYNDROM_UP		40	0.355934	0.961387	0.508571	0.948788	1	2302	tags=35%, list=18%, signal=42%
REACTOME_SIGNAL_AMPLIFICATION	REACTOME_SIGNAL_AMPLIFICATION		27	0.279095	0.961117	0.50677	0.94831	1	3338	tags=37%, list=26%, signal=50%
RICKMAN_TUMOR_DIFFERENTIATED_WELL_VS_MODERATELY_UP	RICKMAN_TUMOR_DIFFERENTIATED_WELL_VS_MODERATELY_UP		74	0.276473	0.96063	0.529289	0.948476	1	2107	tags=26%, list=16%, signal=30%
SEITZ_NEOPLASTIC_TRANSFORMATION_BY_8P_DELETION_DN	SEITZ_NEOPLASTIC_TRANSFORMATION_BY_8P_DELETION_DN		27	0.340738	0.960602	0.488	0.947305	1	1634	tags=22%, list=13%, signal=25%
REACTOME_MAP_KINASE_ACTIVATION_IN_TLR_CASCADE	REACTOME_MAP_KINASE_ACTIVATION_IN_TLR_CASCADE		44	0.294398	0.960511	0.489362	0.946318	1	3277	tags=34%, list=25%, signal=45%
RUAN_RESPONSE_TO_TROGLITAZONE_DN	RUAN_RESPONSE_TO_TROGLITAZONE_DN		17	0.390462	0.959556	0.536	0.947893	1	1658	tags=35%, list=13%, signal=40%
REACTOME_TAK1_ACTIVATES_NFKB_BY_PHOSPHORYLATION_AND_ACTIVATION_OF_IKKS_COMPLEX	REACTOME_TAK1_ACTIVATES_NFKB_BY_PHOSPHORYLATION_AND_ACTIVATION_OF_IKKS_COMPLEX		19	0.324383	0.958232	0.508265	0.950405	1	2925	tags=32%, list=22%, signal=41%
BIOCARTA_PPARA_PATHWAY	BIOCARTA_PPARA_PATHWAY		51	0.301383	0.957402	0.495049	0.951609	1	1406	tags=22%, list=11%, signal=24%
TOMIDA_METASTASIS_DN	TOMIDA_METASTASIS_DN		15	0.376088	0.956703	0.521127	0.9524	1	670	tags=13%, list=5%, signal=14%
BIOCARTA_CD40_PATHWAY	BIOCARTA_CD40_PATHWAY		15	0.349913	0.955976	0.525773	0.953273	1	2925	tags=40%, list=22%, signal=52%
REACTOME_PRE_NOTCH_PROCESSING_IN_GOLGI	REACTOME_PRE_NOTCH_PROCESSING_IN_GOLGI		15	0.365528	0.954682	0.519685	0.955724	1	1784	tags=20%, list=14%, signal=23%
ZHAN_MULTIPLE_MYELOMA_MS_DN	ZHAN_MULTIPLE_MYELOMA_MS_DN		28	0.292663	0.954058	0.519841	0.956327	1	3276	tags=39%, list=25%, signal=52%
JOSEPH_RESPONSE_TO_SODIUM_BUTYRATE_DN	JOSEPH_RESPONSE_TO_SODIUM_BUTYRATE_DN		59	0.315291	0.953167	0.507491	0.957637	1	2045	tags=27%, list=16%, signal=32%
BRACHAT_RESPONSE_TO_CAMPTOTHECIN_UP	BRACHAT_RESPONSE_TO_CAMPTOTHECIN_UP		21	0.371673	0.952781	0.513889	0.957431	1	1471	tags=29%, list=11%, signal=32%
GARGALOVIC_RESPONSE_TO_OXIDIZED_PHOSPHOLIPIDS_BLUE_DN	GARGALOVIC_RESPONSE_TO_OXIDIZED_PHOSPHOLIPIDS_BLUE_DN		36	0.301625	0.952637	0.522358	0.956606	1	2020	tags=28%, list=15%, signal=33%
MIKKELSEN_ES_LCP_WITH_H3K4ME3	MIKKELSEN_ES_LCP_WITH_H3K4ME3		78	0.286164	0.952405	0.515873	0.956088	1	1667	tags=18%, list=13%, signal=20%
MIKKELSEN_ES_ICP_WITH_H3K4ME3	MIKKELSEN_ES_ICP_WITH_H3K4ME3		444	0.226775	0.952227	0.56405	0.955386	1	2078	tags=20%, list=16%, signal=23%
MIKKELSEN_MCV6_LCP_WITH_H3K4ME3	MIKKELSEN_MCV6_LCP_WITH_H3K4ME3		110	0.296157	0.952126	0.518145	0.954462	1	1568	tags=20%, list=12%, signal=23%
LEE_LIVER_CANCER_ACOX1_UP	LEE_LIVER_CANCER_ACOX1_UP		60	0.352286	0.95144	0.525912	0.955248	1	2206	tags=30%, list=17%, signal=36%
ZHANG_RESPONSE_TO_IKK_INHIBITOR_AND_TNF_DN	ZHANG_RESPONSE_TO_IKK_INHIBITOR_AND_TNF_DN		68	0.284359	0.950906	0.506098	0.955583	1	2126	tags=26%, list=16%, signal=31%
JIANG_VHL_TARGETS	JIANG_VHL_TARGETS		105	0.248229	0.9508	0.541247	0.95464	1	3135	tags=31%, list=24%, signal=41%
KOHOUTEK_CCNT2_TARGETS	KOHOUTEK_CCNT2_TARGETS		36	0.326301	0.94942	0.54375	0.957357	1	1081	tags=17%, list=8%, signal=18%
STEIN_ESRRA_TARGETS_RESPONSIVE_TO_ESTROGEN_UP	STEIN_ESRRA_TARGETS_RESPONSIVE_TO_ESTROGEN_UP		27	0.348401	0.949336	0.542	0.956368	1	447	tags=15%, list=3%, signal=15%
MENSSEN_MYC_TARGETS	MENSSEN_MYC_TARGETS		47	0.325569	0.948379	0.513779	0.957912	1	3219	tags=34%, list=25%, signal=45%
HEDENFALK_BREAST_CANCER_HEREDITARY_VS_SPORADIC	HEDENFALK_BREAST_CANCER_HEREDITARY_VS_SPORADIC		46	0.303816	0.948247	0.54071	0.957078	1	2643	tags=35%, list=20%, signal=43%
KIM_RESPONSE_TO_TSA_AND_DECITABINE_UP	KIM_RESPONSE_TO_TSA_AND_DECITABINE_UP		121	0.306021	0.947079	0.530693	0.959276	1	1724	tags=23%, list=13%, signal=26%
KEGG_LINOLEIC_ACID_METABOLISM	KEGG_LINOLEIC_ACID_METABOLISM		25	0.40219	0.946863	0.531187	0.958703	1	2089	tags=32%, list=16%, signal=38%
LU_AGING_BRAIN_DN	LU_AGING_BRAIN_DN		142	0.239	0.946641	0.533207	0.958145	1	3054	tags=31%, list=23%, signal=40%
MITSIADES_RESPONSE_TO_APLIDIN_UP	MITSIADES_RESPONSE_TO_APLIDIN_UP		396	0.238044	0.946512	0.533203	0.957277	1	2543	tags=24%, list=20%, signal=30%
BROWNE_HCMV_INFECTION_20HR_UP	BROWNE_HCMV_INFECTION_20HR_UP		216	0.210302	0.946055	0.601961	0.95742	1	2838	tags=28%, list=22%, signal=36%
BOGNI_TREATMENT_RELATED_MYELOID_LEUKEMIA_UP	BOGNI_TREATMENT_RELATED_MYELOID_LEUKEMIA_UP		26	0.303052	0.944913	0.558522	0.959564	1	1161	tags=19%, list=9%, signal=21%
LIANG_HEMATOPOIESIS_STEM_CELL_NUMBER_LARGE_VS_TINY_DN	LIANG_HEMATOPOIESIS_STEM_CELL_NUMBER_LARGE_VS_TINY_DN		34	0.282506	0.944815	0.532	0.958642	1	1898	tags=26%, list=15%, signal=31%
DORSAM_HOXA9_TARGETS_UP	DORSAM_HOXA9_TARGETS_UP		31	0.283082	0.944622	0.55511	0.957992	1	1454	tags=23%, list=11%, signal=25%
QUINTENS_EMBRYONIC_BRAIN_RESPONSE_TO_IR	QUINTENS_EMBRYONIC_BRAIN_RESPONSE_TO_IR		57	0.273178	0.944431	0.561753	0.957308	1	1685	tags=21%, list=13%, signal=24%
OUYANG_PROSTATE_CANCER_PROGRESSION_UP	OUYANG_PROSTATE_CANCER_PROGRESSION_UP		16	0.369349	0.944197	0.534884	0.95676	1	2179	tags=31%, list=17%, signal=37%
SWEET_LUNG_CANCER_KRAS_UP	SWEET_LUNG_CANCER_KRAS_UP		419	0.245421	0.944132	0.56338	0.955757	1	2944	tags=30%, list=23%, signal=38%
BAKKER_FOXO3_TARGETS_DN	BAKKER_FOXO3_TARGETS_DN		128	0.244431	0.944059	0.573441	0.954762	1	2701	tags=28%, list=21%, signal=35%
ZHANG_INTERFERON_RESPONSE	ZHANG_INTERFERON_RESPONSE		22	0.484594	0.944018	0.538462	0.953696	1	1374	tags=27%, list=11%, signal=30%
STEIN_ESTROGEN_RESPONSE_NOT_VIA_ESRRA	STEIN_ESTROGEN_RESPONSE_NOT_VIA_ESRRA		17	0.388806	0.943998	0.541414	0.952569	1	2254	tags=41%, list=17%, signal=50%
MOREAUX_MULTIPLE_MYELOMA_BY_TACI_DN	MOREAUX_MULTIPLE_MYELOMA_BY_TACI_DN		128	0.298057	0.943856	0.516393	0.951827	1	3233	tags=41%, list=25%, signal=55%
TAKAO_RESPONSE_TO_UVB_RADIATION_UP	TAKAO_RESPONSE_TO_UVB_RADIATION_UP		83	0.221091	0.943052	0.539554	0.952928	1	4298	tags=45%, list=33%, signal=66%
BROWNE_HCMV_INFECTION_14HR_DN	BROWNE_HCMV_INFECTION_14HR_DN		273	0.229121	0.942807	0.606119	0.952496	1	1568	tags=17%, list=12%, signal=19%
AMIT_SERUM_RESPONSE_480_MCF10A	AMIT_SERUM_RESPONSE_480_MCF10A		36	0.343042	0.942282	0.538302	0.952785	1	3189	tags=33%, list=24%, signal=44%
PENG_GLUTAMINE_DEPRIVATION_DN	PENG_GLUTAMINE_DEPRIVATION_DN		299	0.268101	0.941905	0.518812	0.952685	1	3867	tags=40%, list=30%, signal=55%
ZHANG_TARGETS_OF_EWSR1_FLI1_FUSION	ZHANG_TARGETS_OF_EWSR1_FLI1_FUSION		79	0.288004	0.941634	0.538	0.952293	1	1541	tags=19%, list=12%, signal=21%
BIOCARTA_CARDIACEGF_PATHWAY	BIOCARTA_CARDIACEGF_PATHWAY		17	0.365436	0.941155	0.519231	0.952398	1	2977	tags=35%, list=23%, signal=46%
MARTINEZ_TP53_TARGETS_UP	MARTINEZ_TP53_TARGETS_UP		479	0.228543	0.94081	0.563851	0.952188	1	2633	tags=25%, list=20%, signal=30%
RODRIGUES_DCC_TARGETS_DN	RODRIGUES_DCC_TARGETS_DN		104	0.28033	0.939832	0.558045	0.953878	1	2101	tags=26%, list=16%, signal=31%
REACTOME_NOD1_2_SIGNALING_PATHWAY	REACTOME_NOD1_2_SIGNALING_PATHWAY		25	0.329687	0.93968	0.536926	0.953124	1	1521	tags=20%, list=12%, signal=23%
SMIRNOV_RESPONSE_TO_IR_6HR_UP	SMIRNOV_RESPONSE_TO_IR_6HR_UP		147	0.263721	0.939605	0.568862	0.952155	1	2314	tags=28%, list=18%, signal=34%
VECCHI_GASTRIC_CANCER_EARLY_DN	VECCHI_GASTRIC_CANCER_EARLY_DN		268	0.319245	0.939028	0.555094	0.952624	1	1571	tags=21%, list=12%, signal=23%
SCHUETZ_BREAST_CANCER_DUCTAL_INVASIVE_DN	SCHUETZ_BREAST_CANCER_DUCTAL_INVASIVE_DN		81	0.299304	0.937603	0.587755	0.955429	1	1972	tags=25%, list=15%, signal=29%
WANG_TUMOR_INVASIVENESS_UP	WANG_TUMOR_INVASIVENESS_UP		313	0.227486	0.937524	0.541082	0.954473	1	2663	tags=24%, list=20%, signal=29%
HEDENFALK_BREAST_CANCER_BRCA1_VS_BRCA2	HEDENFALK_BREAST_CANCER_BRCA1_VS_BRCA2		146	0.269282	0.937257	0.554217	0.954069	1	2644	tags=29%, list=20%, signal=36%
GYORFFY_MITOXANTRONE_RESISTANCE	GYORFFY_MITOXANTRONE_RESISTANCE		38	0.320096	0.937191	0.53507	0.953063	1	343	tags=13%, list=3%, signal=13%
RODRIGUES_NTN1_AND_DCC_TARGETS	RODRIGUES_NTN1_AND_DCC_TARGETS		30	0.382451	0.936974	0.556936	0.952547	1	1396	tags=27%, list=11%, signal=30%
YE_METASTATIC_LIVER_CANCER	YE_METASTATIC_LIVER_CANCER		26	0.349912	0.936037	0.569388	0.954046	1	597	tags=19%, list=5%, signal=20%
REACTOME_S_PHASE	REACTOME_S_PHASE		94	0.337341	0.935558	0.561866	0.954216	1	3316	tags=44%, list=25%, signal=58%
GARGALOVIC_RESPONSE_TO_OXIDIZED_PHOSPHOLIPIDS_TURQUOISE_UP	GARGALOVIC_RESPONSE_TO_OXIDIZED_PHOSPHOLIPIDS_TURQUOISE_UP		54	0.298167	0.935149	0.568966	0.954254	1	1698	tags=20%, list=13%, signal=23%
MEDINA_SMARCA4_TARGETS	MEDINA_SMARCA4_TARGETS		39	0.264568	0.934941	0.55	0.953678	1	2509	tags=31%, list=19%, signal=38%
BOYLAN_MULTIPLE_MYELOMA_D_UP	BOYLAN_MULTIPLE_MYELOMA_D_UP		60	0.290964	0.934682	0.567623	0.953259	1	1083	tags=15%, list=8%, signal=16%
CEBALLOS_TARGETS_OF_TP53_AND_MYC_UP	CEBALLOS_TARGETS_OF_TP53_AND_MYC_UP		20	0.399685	0.934671	0.574181	0.95213	1	1762	tags=35%, list=14%, signal=40%
GOTTWEIN_TARGETS_OF_KSHV_MIR_K12_11	GOTTWEIN_TARGETS_OF_KSHV_MIR_K12_11		44	0.279478	0.934096	0.561538	0.952593	1	2419	tags=30%, list=19%, signal=36%
GRYDER_PAX3FOXO1_TOP_ENHANCERS	GRYDER_PAX3FOXO1_TOP_ENHANCERS		332	0.229966	0.934093	0.575397	0.951448	1	2697	tags=25%, list=21%, signal=31%
KEGG_REGULATION_OF_AUTOPHAGY	KEGG_REGULATION_OF_AUTOPHAGY		31	0.238228	0.933566	0.535714	0.951756	1	2276	tags=23%, list=17%, signal=27%
MARIADASON_REGULATED_BY_HISTONE_ACETYLATION_DN	MARIADASON_REGULATED_BY_HISTONE_ACETYLATION_DN		33	0.295055	0.933388	0.558522	0.951124	1	1201	tags=18%, list=9%, signal=20%
FRASOR_TAMOXIFEN_RESPONSE_UP	FRASOR_TAMOXIFEN_RESPONSE_UP		43	0.322168	0.933115	0.574468	0.950785	1	1065	tags=19%, list=8%, signal=20%
NAKAMURA_CANCER_MICROENVIRONMENT_DN	NAKAMURA_CANCER_MICROENVIRONMENT_DN		37	0.385246	0.932572	0.548583	0.951197	1	1477	tags=24%, list=11%, signal=27%
FONTAINE_PAPILLARY_THYROID_CARCINOMA_DN	FONTAINE_PAPILLARY_THYROID_CARCINOMA_DN		58	0.281946	0.932419	0.556468	0.950428	1	1443	tags=16%, list=11%, signal=17%
HOFFMANN_IMMATURE_TO_MATURE_B_LYMPHOCYTE_DN	HOFFMANN_IMMATURE_TO_MATURE_B_LYMPHOCYTE_DN		45	0.288852	0.931999	0.550201	0.950407	1	925	tags=13%, list=7%, signal=14%
WANG_RESPONSE_TO_ANDROGEN_UP	WANG_RESPONSE_TO_ANDROGEN_UP		25	0.323513	0.931691	0.527835	0.950132	1	2907	tags=32%, list=22%, signal=41%
YIH_RESPONSE_TO_ARSENITE_C2	YIH_RESPONSE_TO_ARSENITE_C2		18	0.318957	0.931006	0.562372	0.950818	1	661	tags=17%, list=5%, signal=18%
WANG_TARGETS_OF_MLL_CBP_FUSION_DN	WANG_TARGETS_OF_MLL_CBP_FUSION_DN		39	0.312107	0.930703	0.529528	0.950477	1	3633	tags=44%, list=28%, signal=60%
BROWNE_HCMV_INFECTION_14HR_UP	BROWNE_HCMV_INFECTION_14HR_UP		140	0.269063	0.930622	0.573386	0.949564	1	1679	tags=20%, list=13%, signal=23%
GENTILE_UV_RESPONSE_CLUSTER_D5	GENTILE_UV_RESPONSE_CLUSTER_D5		33	0.274988	0.930216	0.568589	0.949549	1	3683	tags=45%, list=28%, signal=63%
CHNG_MULTIPLE_MYELOMA_HYPERPLOID_DN	CHNG_MULTIPLE_MYELOMA_HYPERPLOID_DN		28	0.312179	0.929764	0.537074	0.949647	1	3814	tags=43%, list=29%, signal=60%
GALLUZZI_PERMEABILIZE_MITOCHONDRIA	GALLUZZI_PERMEABILIZE_MITOCHONDRIA		41	0.300605	0.929633	0.562753	0.948898	1	2860	tags=32%, list=22%, signal=40%
MILI_PSEUDOPODIA_HAPTOTAXIS_UP	MILI_PSEUDOPODIA_HAPTOTAXIS_UP		362	0.262141	0.928613	0.527083	0.950623	1	2961	tags=33%, list=23%, signal=42%
BRUINS_UVC_RESPONSE_EARLY_LATE	BRUINS_UVC_RESPONSE_EARLY_LATE		220	0.217495	0.927299	0.585366	0.953238	1	2034	tags=19%, list=16%, signal=22%
DARWICHE_SKIN_TUMOR_PROMOTER_DN	DARWICHE_SKIN_TUMOR_PROMOTER_DN		133	0.218877	0.927293	0.609756	0.95213	1	2228	tags=20%, list=17%, signal=24%
REACTOME_GLYCOLYSIS	REACTOME_GLYCOLYSIS		27	0.355589	0.92659	0.562118	0.952905	1	1513	tags=26%, list=12%, signal=29%
REACTOME_SYNTHESIS_OF_DNA	REACTOME_SYNTHESIS_OF_DNA		79	0.347777	0.926581	0.584179	0.951797	1	3316	tags=44%, list=25%, signal=59%
PID_PI3KCI_AKT_PATHWAY	PID_PI3KCI_AKT_PATHWAY		28	0.297995	0.926486	0.540918	0.95094	1	2515	tags=29%, list=19%, signal=35%
ZHOU_TNF_SIGNALING_30MIN	ZHOU_TNF_SIGNALING_30MIN		46	0.327171	0.925664	0.548689	0.951996	1	2093	tags=30%, list=16%, signal=36%
REACTOME_TRAF6_MEDIATED_INDUCTION_OF_NFKB_AND_MAP_KINASES_UPON_TLR7_8_OR_9_ACTIVATION	REACTOME_TRAF6_MEDIATED_INDUCTION_OF_NFKB_AND_MAP_KINASES_UPON_TLR7_8_OR_9_ACTIVATION		67	0.252278	0.925577	0.573122	0.951125	1	3277	tags=33%, list=25%, signal=44%
DACOSTA_UV_RESPONSE_VIA_ERCC3_TTD_UP	DACOSTA_UV_RESPONSE_VIA_ERCC3_TTD_UP		58	0.280015	0.924963	0.544592	0.951704	1	2315	tags=24%, list=18%, signal=29%
WANG_RESPONSE_TO_GSK3_INHIBITOR_SB216763_UP	WANG_RESPONSE_TO_GSK3_INHIBITOR_SB216763_UP		234	0.254271	0.924518	0.560729	0.951785	1	2087	tags=23%, list=16%, signal=27%
ACOSTA_PROLIFERATION_INDEPENDENT_MYC_TARGETS_UP	ACOSTA_PROLIFERATION_INDEPENDENT_MYC_TARGETS_UP		76	0.281103	0.924287	0.574553	0.951239	1	3352	tags=39%, list=26%, signal=53%
LANDIS_ERBB2_BREAST_TUMORS_324_UP	LANDIS_ERBB2_BREAST_TUMORS_324_UP		118	0.296824	0.923031	0.596838	0.953562	1	1847	tags=23%, list=14%, signal=26%
GRADE_COLON_VS_RECTAL_CANCER_UP	GRADE_COLON_VS_RECTAL_CANCER_UP		29	0.307424	0.922519	0.569745	0.953842	1	1958	tags=28%, list=15%, signal=32%
WILSON_PROTEASES_AT_TUMOR_BONE_INTERFACE_UP	WILSON_PROTEASES_AT_TUMOR_BONE_INTERFACE_UP		21	0.345442	0.921795	0.584646	0.954697	1	1835	tags=33%, list=14%, signal=39%
VALK_AML_CLUSTER_8	VALK_AML_CLUSTER_8		25	0.30173	0.921411	0.607803	0.9546	1	670	tags=16%, list=5%, signal=17%
YANG_BREAST_CANCER_ESR1_LASER_DN	YANG_BREAST_CANCER_ESR1_LASER_DN		47	0.315695	0.919771	0.559426	0.958014	1	2683	tags=36%, list=21%, signal=45%
MULLIGHAN_NPM1_SIGNATURE_3_UP	MULLIGHAN_NPM1_SIGNATURE_3_UP		300	0.200881	0.919637	0.671287	0.957246	1	2630	tags=23%, list=20%, signal=28%
WANG_CISPLATIN_RESPONSE_AND_XPC_DN	WANG_CISPLATIN_RESPONSE_AND_XPC_DN		201	0.232016	0.918362	0.612	0.959655	1	1832	tags=19%, list=14%, signal=22%
BROWNE_HCMV_INFECTION_16HR_UP	BROWNE_HCMV_INFECTION_16HR_UP		207	0.246846	0.917618	0.605809	0.960587	1	2761	tags=28%, list=21%, signal=35%
IVANOVA_HEMATOPOIESIS_STEM_CELL_SHORT_TERM	IVANOVA_HEMATOPOIESIS_STEM_CELL_SHORT_TERM		24	0.308053	0.917549	0.592593	0.95968	1	1944	tags=29%, list=15%, signal=34%
SCIBETTA_KDM5B_TARGETS_DN	SCIBETTA_KDM5B_TARGETS_DN		71	0.31924	0.916594	0.612774	0.961168	1	1894	tags=24%, list=15%, signal=28%
BERENJENO_TRANSFORMED_BY_RHOA_DN	BERENJENO_TRANSFORMED_BY_RHOA_DN		330	0.26302	0.916088	0.566337	0.96144	1	2647	tags=31%, list=20%, signal=37%
REACTOME_PREFOLDIN_MEDIATED_TRANSFER_OF_SUBSTRATE_TO_CCT_TRIC	REACTOME_PREFOLDIN_MEDIATED_TRANSFER_OF_SUBSTRATE_TO_CCT_TRIC		20	0.338799	0.915608	0.549296	0.961634	1	4258	tags=45%, list=33%, signal=67%
MULLIGAN_NTF3_SIGNALING_VIA_INSR_AND_IGF1R_UP	MULLIGAN_NTF3_SIGNALING_VIA_INSR_AND_IGF1R_UP		20	0.326704	0.915331	0.579051	0.961342	1	733	tags=15%, list=6%, signal=16%
GROSS_ELK3_TARGETS_DN	GROSS_ELK3_TARGETS_DN		27	0.373982	0.914783	0.577075	0.961722	1	970	tags=22%, list=7%, signal=24%
KANG_GLIS3_TARGETS	KANG_GLIS3_TARGETS		33	0.339605	0.914269	0.579618	0.962034	1	2441	tags=24%, list=19%, signal=30%
PILON_KLF1_TARGETS_UP	PILON_KLF1_TARGETS_UP		389	0.242464	0.914034	0.638095	0.961572	1	2900	tags=30%, list=22%, signal=38%
RICKMAN_TUMOR_DIFFERENTIATED_WELL_VS_POORLY_DN	RICKMAN_TUMOR_DIFFERENTIATED_WELL_VS_POORLY_DN		268	0.247023	0.913814	0.574468	0.96103	1	2397	tags=24%, list=18%, signal=28%
BIOCARTA_TNFR2_PATHWAY	BIOCARTA_TNFR2_PATHWAY		18	0.326469	0.913382	0.579477	0.96105	1	1202	tags=22%, list=9%, signal=24%
SCHLOSSER_MYC_TARGETS_AND_SERUM_RESPONSE_DN	SCHLOSSER_MYC_TARGETS_AND_SERUM_RESPONSE_DN		45	0.321631	0.912861	0.541582	0.961292	1	3547	tags=40%, list=27%, signal=55%
HUANG_DASATINIB_RESISTANCE_DN	HUANG_DASATINIB_RESISTANCE_DN		50	0.281334	0.912791	0.59751	0.96039	1	1773	tags=24%, list=14%, signal=28%
BILANGES_SERUM_SENSITIVE_GENES	BILANGES_SERUM_SENSITIVE_GENES		63	0.240866	0.912734	0.650602	0.959444	1	2305	tags=24%, list=18%, signal=29%
PID_IL1_PATHWAY	PID_IL1_PATHWAY		31	0.271897	0.9121	0.614919	0.96005	1	1430	tags=19%, list=11%, signal=22%
COLLER_MYC_TARGETS_UP	COLLER_MYC_TARGETS_UP		23	0.359441	0.91167	0.588469	0.960106	1	2606	tags=30%, list=20%, signal=38%
CROMER_METASTASIS_UP	CROMER_METASTASIS_UP		69	0.278283	0.911536	0.602794	0.959394	1	1769	tags=20%, list=14%, signal=23%
CASORELLI_APL_SECONDARY_VS_DE_NOVO_UP	CASORELLI_APL_SECONDARY_VS_DE_NOVO_UP		34	0.336955	0.910741	0.623782	0.960393	1	2238	tags=29%, list=17%, signal=35%
LEE_LIVER_CANCER_E2F1_UP	LEE_LIVER_CANCER_E2F1_UP		61	0.347263	0.910025	0.60479	0.961264	1	1315	tags=23%, list=10%, signal=25%
REACTOME_NUCLEAR_RECEPTOR_TRANSCRIPTION_PATHWAY	REACTOME_NUCLEAR_RECEPTOR_TRANSCRIPTION_PATHWAY		44	0.284886	0.908728	0.555332	0.963763	1	2845	tags=32%, list=22%, signal=41%
KIM_WT1_TARGETS_DN	KIM_WT1_TARGETS_DN		413	0.272987	0.908673	0.598377	0.962832	1	2590	tags=30%, list=20%, signal=36%
REACTOME_SIGNALING_BY_ERBB4	REACTOME_SIGNALING_BY_ERBB4		73	0.237281	0.908196	0.623016	0.96303	1	2515	tags=25%, list=19%, signal=30%
BIOCARTA_ACTINY_PATHWAY	BIOCARTA_ACTINY_PATHWAY		19	0.316836	0.908055	0.586139	0.962363	1	3251	tags=42%, list=25%, signal=56%
MIKKELSEN_NPC_ICP_WITH_H3K4ME3	MIKKELSEN_NPC_ICP_WITH_H3K4ME3		290	0.212982	0.907632	0.680473	0.962419	1	2127	tags=20%, list=16%, signal=24%
LU_EZH2_TARGETS_DN	LU_EZH2_TARGETS_DN		282	0.247201	0.906798	0.615385	0.963581	1	1955	tags=21%, list=15%, signal=24%
BURTON_ADIPOGENESIS_12	BURTON_ADIPOGENESIS_12		23	0.316372	0.90659	0.57265	0.963079	1	3535	tags=48%, list=27%, signal=66%
BIOCARTA_EPO_PATHWAY	BIOCARTA_EPO_PATHWAY		19	0.307401	0.906261	0.571142	0.962917	1	2386	tags=21%, list=18%, signal=26%
KEGG_EPITHELIAL_CELL_SIGNALING_IN_HELICOBACTER_PYLORI_INFECTION	KEGG_EPITHELIAL_CELL_SIGNALING_IN_HELICOBACTER_PYLORI_INFECTION		61	0.24668	0.906235	0.606526	0.961911	1	2836	tags=31%, list=22%, signal=40%
DELYS_THYROID_CANCER_DN	DELYS_THYROID_CANCER_DN		221	0.304452	0.904417	0.59332	0.965707	1	1599	tags=22%, list=12%, signal=25%
BARRIER_COLON_CANCER_RECURRENCE_UP	BARRIER_COLON_CANCER_RECURRENCE_UP		37	0.277427	0.904165	0.595238	0.965345	1	2597	tags=24%, list=20%, signal=30%
ZHU_SKIL_TARGETS_UP	ZHU_SKIL_TARGETS_UP		20	0.38349	0.904018	0.579477	0.964639	1	1955	tags=25%, list=15%, signal=29%
BERTUCCI_MEDULLARY_VS_DUCTAL_BREAST_CANCER_UP	BERTUCCI_MEDULLARY_VS_DUCTAL_BREAST_CANCER_UP		153	0.287807	0.903113	0.577778	0.96594	1	2138	tags=27%, list=16%, signal=32%
MURAKAMI_UV_RESPONSE_1HR_UP	MURAKAMI_UV_RESPONSE_1HR_UP		16	0.316381	0.902646	0.575258	0.966139	1	913	tags=19%, list=7%, signal=20%
GARY_CD5_TARGETS_UP	GARY_CD5_TARGETS_UP		365	0.232158	0.901457	0.625235	0.968361	1	2610	tags=26%, list=20%, signal=32%
SMID_BREAST_CANCER_LUMINAL_A_UP	SMID_BREAST_CANCER_LUMINAL_A_UP		83	0.341202	0.899586	0.610101	0.972216	1	534	tags=16%, list=4%, signal=16%
FLECHNER_PBL_KIDNEY_TRANSPLANT_OK_VS_DONOR_DN	FLECHNER_PBL_KIDNEY_TRANSPLANT_OK_VS_DONOR_DN		37	0.292944	0.899355	0.579268	0.971758	1	3242	tags=38%, list=25%, signal=50%
RIZKI_TUMOR_INVASIVENESS_3D_DN	RIZKI_TUMOR_INVASIVENESS_3D_DN		241	0.223128	0.899151	0.665339	0.971198	1	2064	tags=21%, list=16%, signal=24%
DEBIASI_APOPTOSIS_BY_REOVIRUS_INFECTION_UP	DEBIASI_APOPTOSIS_BY_REOVIRUS_INFECTION_UP		280	0.263127	0.898774	0.620202	0.971154	1	2514	tags=28%, list=19%, signal=34%
CHANDRAN_METASTASIS_TOP50_DN	CHANDRAN_METASTASIS_TOP50_DN		35	0.305763	0.897971	0.59879	0.972252	1	2104	tags=29%, list=16%, signal=34%
YAGI_AML_WITH_T_9_11_TRANSLOCATION	YAGI_AML_WITH_T_9_11_TRANSLOCATION		122	0.227243	0.897204	0.659363	0.973188	1	2833	tags=27%, list=22%, signal=34%
GROSS_HYPOXIA_VIA_ELK3_ONLY_UP	GROSS_HYPOXIA_VIA_ELK3_ONLY_UP		33	0.353736	0.897002	0.596422	0.97262	1	1351	tags=21%, list=10%, signal=24%
BHAT_ESR1_TARGETS_NOT_VIA_AKT1_DN	BHAT_ESR1_TARGETS_NOT_VIA_AKT1_DN		67	0.272055	0.896019	0.671937	0.974164	1	2244	tags=24%, list=17%, signal=29%
GENTILE_UV_RESPONSE_CLUSTER_D9	GENTILE_UV_RESPONSE_CLUSTER_D9		19	0.380215	0.895651	0.604938	0.974093	1	1175	tags=21%, list=9%, signal=23%
BIOCARTA_RELA_PATHWAY	BIOCARTA_RELA_PATHWAY		16	0.301076	0.894758	0.587045	0.975371	1	942	tags=19%, list=7%, signal=20%
GRAESSMANN_APOPTOSIS_BY_SERUM_DEPRIVATION_UP	GRAESSMANN_APOPTOSIS_BY_SERUM_DEPRIVATION_UP		415	0.231452	0.894729	0.660118	0.974375	1	2618	tags=25%, list=20%, signal=30%
MARKS_HDAC_TARGETS_UP	MARKS_HDAC_TARGETS_UP		21	0.330412	0.894452	0.60757	0.974024	1	3882	tags=52%, list=30%, signal=74%
BERNARD_PPAPDC1B_TARGETS_UP	BERNARD_PPAPDC1B_TARGETS_UP		32	0.277967	0.893971	0.618774	0.974224	1	1593	tags=19%, list=12%, signal=21%
PODAR_RESPONSE_TO_ADAPHOSTIN_UP	PODAR_RESPONSE_TO_ADAPHOSTIN_UP		134	0.288884	0.893527	0.607767	0.974387	1	2517	tags=28%, list=19%, signal=34%
REACTOME_DARPP_32_EVENTS	REACTOME_DARPP_32_EVENTS		23	0.287258	0.893259	0.636187	0.974032	1	588	tags=13%, list=5%, signal=14%
BRUINS_UVC_RESPONSE_MIDDLE	BRUINS_UVC_RESPONSE_MIDDLE		64	0.237307	0.892543	0.630952	0.974858	1	1700	tags=16%, list=13%, signal=18%
JIANG_TIP30_TARGETS_DN	JIANG_TIP30_TARGETS_DN		23	0.333206	0.89242	0.577689	0.97411	1	3629	tags=39%, list=28%, signal=54%
CHIARADONNA_NEOPLASTIC_TRANSFORMATION_CDC25_DN	CHIARADONNA_NEOPLASTIC_TRANSFORMATION_CDC25_DN		133	0.280694	0.892341	0.601562	0.97325	1	1536	tags=20%, list=12%, signal=23%
DARWICHE_PAPILLOMA_RISK_LOW_DN	DARWICHE_PAPILLOMA_RISK_LOW_DN		113	0.207885	0.891023	0.709125	0.975697	1	2228	tags=21%, list=17%, signal=25%
REACTOME_TIGHT_JUNCTION_INTERACTIONS	REACTOME_TIGHT_JUNCTION_INTERACTIONS		22	0.362524	0.890193	0.580709	0.976749	1	1847	tags=27%, list=14%, signal=32%
REACTOME_GLUCAGON_TYPE_LIGAND_RECEPTORS	REACTOME_GLUCAGON_TYPE_LIGAND_RECEPTORS		30	0.264883	0.890191	0.57115	0.975685	1	887	tags=10%, list=7%, signal=11%
PENG_LEUCINE_DEPRIVATION_DN	PENG_LEUCINE_DEPRIVATION_DN		170	0.259069	0.890189	0.610895	0.974621	1	3672	tags=38%, list=28%, signal=52%
BASAKI_YBX1_TARGETS_DN	BASAKI_YBX1_TARGETS_DN		268	0.257913	0.89018	0.699612	0.973583	1	1922	tags=24%, list=15%, signal=27%
PACHER_TARGETS_OF_IGF1_AND_IGF2_UP	PACHER_TARGETS_OF_IGF1_AND_IGF2_UP		30	0.326387	0.889895	0.631791	0.973262	1	2314	tags=33%, list=18%, signal=40%
PID_S1P_META_PATHWAY	PID_S1P_META_PATHWAY		16	0.330799	0.889011	0.62	0.97459	1	2667	tags=44%, list=20%, signal=55%
WANG_HCP_PROSTATE_CANCER	WANG_HCP_PROSTATE_CANCER		102	0.267661	0.888606	0.692464	0.974586	1	2103	tags=25%, list=16%, signal=30%
JIANG_TIP30_TARGETS_UP	JIANG_TIP30_TARGETS_UP		39	0.333491	0.887255	0.60757	0.977155	1	2002	tags=33%, list=15%, signal=39%
RIZKI_TUMOR_INVASIVENESS_2D_UP	RIZKI_TUMOR_INVASIVENESS_2D_UP		64	0.242963	0.886264	0.706439	0.978748	1	3070	tags=30%, list=24%, signal=39%
HOEGERKORP_CD44_TARGETS_TEMPORAL_DN	HOEGERKORP_CD44_TARGETS_TEMPORAL_DN		25	0.281366	0.886034	0.619048	0.978283	1	2398	tags=32%, list=18%, signal=39%
WATTEL_AUTONOMOUS_THYROID_ADENOMA_UP	WATTEL_AUTONOMOUS_THYROID_ADENOMA_UP		60	0.263235	0.885934	0.708738	0.977499	1	1716	tags=15%, list=13%, signal=17%
KIM_ALL_DISORDERS_DURATION_CORR_DN	KIM_ALL_DISORDERS_DURATION_CORR_DN		136	0.23324	0.88543	0.633603	0.977759	1	3521	tags=38%, list=27%, signal=52%
REACTOME_SIGNALLING_TO_RAS	REACTOME_SIGNALLING_TO_RAS		25	0.309908	0.885344	0.592157	0.976929	1	3671	tags=44%, list=28%, signal=61%
DACOSTA_UV_RESPONSE_VIA_ERCC3_COMMON_UP	DACOSTA_UV_RESPONSE_VIA_ERCC3_COMMON_UP		71	0.272429	0.885141	0.696498	0.976407	1	3016	tags=34%, list=23%, signal=44%
PASINI_SUZ12_TARGETS_UP	PASINI_SUZ12_TARGETS_UP		79	0.260223	0.884927	0.698189	0.975891	1	1594	tags=19%, list=12%, signal=22%
DELACROIX_RAR_BOUND_ES	DELACROIX_RAR_BOUND_ES		317	0.212021	0.884492	0.740519	0.976018	1	2604	tags=22%, list=20%, signal=27%
BURTON_ADIPOGENESIS_10	BURTON_ADIPOGENESIS_10		23	0.323492	0.884422	0.628684	0.975141	1	1873	tags=35%, list=14%, signal=41%
MARTINEZ_RESPONSE_TO_TRABECTEDIN_DN	MARTINEZ_RESPONSE_TO_TRABECTEDIN_DN		218	0.256821	0.884152	0.615542	0.97481	1	2408	tags=26%, list=18%, signal=31%
REACTOME_INTRINSIC_PATHWAY_FOR_APOPTOSIS	REACTOME_INTRINSIC_PATHWAY_FOR_APOPTOSIS		26	0.283934	0.883508	0.618861	0.975431	1	3664	tags=42%, list=28%, signal=59%
REACTOME_FORMATION_OF_INCISION_COMPLEX_IN_GG_NER	REACTOME_FORMATION_OF_INCISION_COMPLEX_IN_GG_NER		20	0.309297	0.883473	0.595789	0.974477	1	3505	tags=50%, list=27%, signal=68%
REACTOME_M_G1_TRANSITION	REACTOME_M_G1_TRANSITION		68	0.320578	0.882121	0.611222	0.97697	1	3316	tags=44%, list=25%, signal=59%
HOEGERKORP_CD44_TARGETS_DIRECT_UP	HOEGERKORP_CD44_TARGETS_DIRECT_UP		25	0.311474	0.882098	0.63253	0.975983	1	390	tags=12%, list=3%, signal=12%
ZHAN_MULTIPLE_MYELOMA_CD1_UP	ZHAN_MULTIPLE_MYELOMA_CD1_UP		32	0.320794	0.8814	0.671233	0.976787	1	816	tags=16%, list=6%, signal=17%
REACTOME_PERK_REGULATED_GENE_EXPRESSION	REACTOME_PERK_REGULATED_GENE_EXPRESSION		24	0.307222	0.881184	0.637597	0.976344	1	2769	tags=38%, list=21%, signal=48%
NIKOLSKY_BREAST_CANCER_17Q21_Q25_AMPLICON	NIKOLSKY_BREAST_CANCER_17Q21_Q25_AMPLICON		224	0.219452	0.880048	0.598361	0.978241	1	2871	tags=25%, list=22%, signal=32%
VERNELL_RETINOBLASTOMA_PATHWAY_DN	VERNELL_RETINOBLASTOMA_PATHWAY_DN		17	0.37194	0.87999	0.635478	0.97734	1	287	tags=18%, list=2%, signal=18%
FOSTER_KDM1A_TARGETS_DN	FOSTER_KDM1A_TARGETS_DN		150	0.220395	0.879298	0.703476	0.978125	1	3278	tags=30%, list=25%, signal=40%
KOKKINAKIS_METHIONINE_DEPRIVATION_48HR_UP	KOKKINAKIS_METHIONINE_DEPRIVATION_48HR_UP		122	0.266149	0.878778	0.670956	0.978387	1	2475	tags=30%, list=19%, signal=37%
ROSS_AML_WITH_MLL_FUSIONS	ROSS_AML_WITH_MLL_FUSIONS		74	0.270004	0.878726	0.648221	0.97749	1	2373	tags=27%, list=18%, signal=33%
LANDIS_BREAST_CANCER_PROGRESSION_DN	LANDIS_BREAST_CANCER_PROGRESSION_DN		65	0.357597	0.878253	0.618577	0.977637	1	2379	tags=37%, list=18%, signal=45%
BERENJENO_TRANSFORMED_BY_RHOA_FOREVER_UP	BERENJENO_TRANSFORMED_BY_RHOA_FOREVER_UP		17	0.397246	0.876802	0.634578	0.980326	1	1422	tags=35%, list=11%, signal=40%
JAZAERI_BREAST_CANCER_BRCA1_VS_BRCA2_DN	JAZAERI_BREAST_CANCER_BRCA1_VS_BRCA2_DN		36	0.278137	0.875746	0.677019	0.982111	1	1392	tags=19%, list=11%, signal=22%
LIN_NPAS4_TARGETS_UP	LIN_NPAS4_TARGETS_UP		106	0.228853	0.875678	0.689873	0.981271	1	3442	tags=35%, list=26%, signal=47%
MOSERLE_IFNA_RESPONSE	MOSERLE_IFNA_RESPONSE		25	0.49305	0.875157	0.631263	0.98161	1	759	tags=24%, list=6%, signal=25%
LEE_LIVER_CANCER_MYC_TGFA_UP	LEE_LIVER_CANCER_MYC_TGFA_UP		59	0.305526	0.875057	0.702913	0.980838	1	1315	tags=22%, list=10%, signal=24%
REACTOME_RNA_POL_II_TRANSCRIPTION_PRE_INITIATION_AND_PROMOTER_OPENING	REACTOME_RNA_POL_II_TRANSCRIPTION_PRE_INITIATION_AND_PROMOTER_OPENING		38	0.285181	0.874602	0.604603	0.980965	1	3525	tags=45%, list=27%, signal=61%
JISON_SICKLE_CELL_DISEASE_UP	JISON_SICKLE_CELL_DISEASE_UP		173	0.273495	0.874408	0.634538	0.980442	1	2801	tags=32%, list=21%, signal=41%
THEILGAARD_NEUTROPHIL_AT_SKIN_WOUND_DN	THEILGAARD_NEUTROPHIL_AT_SKIN_WOUND_DN		207	0.225242	0.874122	0.679842	0.98015	1	2784	tags=27%, list=21%, signal=34%
CONCANNON_APOPTOSIS_BY_EPOXOMICIN_UP	CONCANNON_APOPTOSIS_BY_EPOXOMICIN_UP		215	0.253894	0.873867	0.680608	0.979748	1	2811	tags=29%, list=22%, signal=37%
KEGG_AMYOTROPHIC_LATERAL_SCLEROSIS_ALS	KEGG_AMYOTROPHIC_LATERAL_SCLEROSIS_ALS		49	0.233991	0.873293	0.689362	0.980161	1	2747	tags=29%, list=21%, signal=36%
YANG_BCL3_TARGETS_UP	YANG_BCL3_TARGETS_UP		278	0.256058	0.872937	0.783366	0.980025	1	1772	tags=21%, list=14%, signal=24%
NIKOLSKY_BREAST_CANCER_16Q24_AMPLICON	NIKOLSKY_BREAST_CANCER_16Q24_AMPLICON		34	0.310715	0.871402	0.579048	0.982951	1	2121	tags=24%, list=16%, signal=28%
SARRIO_EPITHELIAL_MESENCHYMAL_TRANSITION_DN	SARRIO_EPITHELIAL_MESENCHYMAL_TRANSITION_DN		134	0.267032	0.870601	0.662055	0.983977	1	2365	tags=23%, list=18%, signal=28%
FIRESTEIN_CTNNB1_PATHWAY	FIRESTEIN_CTNNB1_PATHWAY		28	0.281015	0.869519	0.651452	0.985642	1	1668	tags=18%, list=13%, signal=20%
MIKKELSEN_MEF_LCP_WITH_H3K4ME3	MIKKELSEN_MEF_LCP_WITH_H3K4ME3		93	0.296496	0.869459	0.620229	0.984752	1	1536	tags=22%, list=12%, signal=24%
DARWICHE_SQUAMOUS_CELL_CARCINOMA_UP	DARWICHE_SQUAMOUS_CELL_CARCINOMA_UP		110	0.230144	0.86932	0.725338	0.984077	1	2842	tags=28%, list=22%, signal=36%
KYNG_DNA_DAMAGE_BY_GAMMA_AND_UV_RADIATION	KYNG_DNA_DAMAGE_BY_GAMMA_AND_UV_RADIATION		77	0.24805	0.868825	0.654762	0.984392	1	3295	tags=36%, list=25%, signal=48%
MIKKELSEN_MEF_LCP_WITH_H3K27ME3	MIKKELSEN_MEF_LCP_WITH_H3K27ME3		37	0.284797	0.868617	0.620202	0.983919	1	746	tags=11%, list=6%, signal=11%
GRADE_COLON_VS_RECTAL_CANCER_DN	GRADE_COLON_VS_RECTAL_CANCER_DN		44	0.258278	0.868512	0.681275	0.983156	1	2048	tags=18%, list=16%, signal=21%
REACTOME_ADP_SIGNALLING_THROUGH_P2RY12	REACTOME_ADP_SIGNALLING_THROUGH_P2RY12		17	0.280794	0.867449	0.650406	0.984828	1	2643	tags=29%, list=20%, signal=37%
SESTO_RESPONSE_TO_UV_C2	SESTO_RESPONSE_TO_UV_C2		48	0.276406	0.866936	0.667351	0.985054	1	2506	tags=29%, list=19%, signal=36%
GRAESSMANN_APOPTOSIS_BY_SERUM_DEPRIVATION_DN	GRAESSMANN_APOPTOSIS_BY_SERUM_DEPRIVATION_DN		182	0.22378	0.866639	0.782158	0.984824	1	2628	tags=26%, list=20%, signal=32%
NIELSEN_LEIOMYOSARCOMA_DN	NIELSEN_LEIOMYOSARCOMA_DN		16	0.35952	0.866375	0.644531	0.984492	1	3314	tags=44%, list=25%, signal=59%
SENESE_HDAC1_TARGETS_UP	SENESE_HDAC1_TARGETS_UP		353	0.238479	0.86485	0.700587	0.987387	1	2252	tags=23%, list=17%, signal=27%
ALONSO_METASTASIS_EMT_UP	ALONSO_METASTASIS_EMT_UP		29	0.3083	0.864115	0.647834	0.988173	1	2991	tags=31%, list=23%, signal=40%
BIOCARTA_KERATINOCYTE_PATHWAY	BIOCARTA_KERATINOCYTE_PATHWAY		45	0.25744	0.863193	0.695568	0.989504	1	2739	tags=31%, list=21%, signal=39%
PID_IL2_1PATHWAY	PID_IL2_1PATHWAY		54	0.254801	0.863046	0.686627	0.988828	1	2749	tags=30%, list=21%, signal=37%
BURTON_ADIPOGENESIS_11	BURTON_ADIPOGENESIS_11		45	0.29239	0.861104	0.647525	0.992661	1	2506	tags=33%, list=19%, signal=41%
NIELSEN_GIST	NIELSEN_GIST		73	0.268766	0.861012	0.707364	0.991852	1	3606	tags=41%, list=28%, signal=56%
BRUINS_UVC_RESPONSE_VIA_TP53_GROUP_B	BRUINS_UVC_RESPONSE_VIA_TP53_GROUP_B		400	0.210514	0.860804	0.778641	0.991332	1	2078	tags=18%, list=16%, signal=20%
MARTORIATI_MDM4_TARGETS_FETAL_LIVER_DN	MARTORIATI_MDM4_TARGETS_FETAL_LIVER_DN		410	0.215323	0.859379	0.748538	0.993893	1	2502	tags=24%, list=19%, signal=29%
REACTOME_CHOLESTEROL_BIOSYNTHESIS	REACTOME_CHOLESTEROL_BIOSYNTHESIS		20	0.442413	0.859245	0.638723	0.993187	1	3728	tags=60%, list=29%, signal=84%
REACTOME_TRNA_AMINOACYLATION	REACTOME_TRNA_AMINOACYLATION		29	0.294468	0.859233	0.57971	0.992198	1	3430	tags=45%, list=26%, signal=61%
RICKMAN_METASTASIS_UP	RICKMAN_METASTASIS_UP		225	0.2326	0.859222	0.674651	0.991211	1	2716	tags=26%, list=21%, signal=33%
NAKAMURA_ADIPOGENESIS_LATE_UP	NAKAMURA_ADIPOGENESIS_LATE_UP		87	0.263015	0.859144	0.751402	0.990394	1	2247	tags=29%, list=17%, signal=34%
WANG_CLIM2_TARGETS_DN	WANG_CLIM2_TARGETS_DN		136	0.224965	0.859064	0.667992	0.989586	1	3831	tags=40%, list=29%, signal=56%
GAVIN_FOXP3_TARGETS_CLUSTER_T7	GAVIN_FOXP3_TARGETS_CLUSTER_T7		83	0.249169	0.857093	0.664694	0.993528	1	3518	tags=39%, list=27%, signal=52%
YAGI_AML_WITH_INV_16_TRANSLOCATION	YAGI_AML_WITH_INV_16_TRANSLOCATION		385	0.178829	0.856387	0.845214	0.994283	1	1703	tags=14%, list=13%, signal=16%
HAHTOLA_CTCL_CUTANEOUS	HAHTOLA_CTCL_CUTANEOUS		26	0.314192	0.856353	0.674134	0.993343	1	895	tags=19%, list=7%, signal=21%
SHEPARD_BMYB_MORPHOLINO_UP	SHEPARD_BMYB_MORPHOLINO_UP		158	0.218909	0.855697	0.775348	0.993956	1	3809	tags=37%, list=29%, signal=51%
REACTOME_PI3K_AKT_ACTIVATION	REACTOME_PI3K_AKT_ACTIVATION		26	0.276052	0.855189	0.687375	0.994217	1	2749	tags=35%, list=21%, signal=44%
BRUNO_HEMATOPOIESIS	BRUNO_HEMATOPOIESIS		61	0.276213	0.855002	0.751434	0.993656	1	2907	tags=38%, list=22%, signal=48%
FARMER_BREAST_CANCER_BASAL_VS_LULMINAL	FARMER_BREAST_CANCER_BASAL_VS_LULMINAL		304	0.239684	0.85484	0.811508	0.993068	1	1781	tags=19%, list=14%, signal=22%
MARIADASON_RESPONSE_TO_CURCUMIN_SULINDAC_5	MARIADASON_RESPONSE_TO_CURCUMIN_SULINDAC_5		21	0.296727	0.854721	0.657426	0.992348	1	3044	tags=33%, list=23%, signal=43%
MULLIGHAN_MLL_SIGNATURE_2_UP	MULLIGHAN_MLL_SIGNATURE_2_UP		378	0.22007	0.853396	0.74031	0.994678	1	1983	tags=20%, list=15%, signal=23%
DARWICHE_PAPILLOMA_RISK_HIGH_UP	DARWICHE_PAPILLOMA_RISK_HIGH_UP		110	0.227651	0.853265	0.768797	0.994016	1	1570	tags=17%, list=12%, signal=19%
LU_AGING_BRAIN_UP	LU_AGING_BRAIN_UP		237	0.245059	0.8525	0.706931	0.994921	1	1738	tags=21%, list=13%, signal=23%
STAMBOLSKY_TARGETS_OF_MUTATED_TP53_UP	STAMBOLSKY_TARGETS_OF_MUTATED_TP53_UP		37	0.265733	0.851784	0.66	0.995715	1	1168	tags=14%, list=9%, signal=15%
LINDGREN_BLADDER_CANCER_CLUSTER_3_UP	LINDGREN_BLADDER_CANCER_CLUSTER_3_UP		256	0.300638	0.851755	0.625743	0.994785	1	3084	tags=35%, list=24%, signal=45%
REACTOME_REGULATION_OF_GLUCOKINASE_BY_GLUCOKINASE_REGULATORY_PROTEIN	REACTOME_REGULATION_OF_GLUCOKINASE_BY_GLUCOKINASE_REGULATORY_PROTEIN		26	0.311385	0.851666	0.65762	0.993996	1	2215	tags=27%, list=17%, signal=32%
BAUS_TFF2_TARGETS_UP	BAUS_TFF2_TARGETS_UP		28	0.344046	0.851183	0.694981	0.994189	1	627	tags=18%, list=5%, signal=19%
LE_EGR2_TARGETS_DN	LE_EGR2_TARGETS_DN		93	0.262831	0.850531	0.779798	0.994795	1	2675	tags=31%, list=21%, signal=39%
SANSOM_APC_MYC_TARGETS	SANSOM_APC_MYC_TARGETS		162	0.217132	0.850461	0.720792	0.993967	1	2268	tags=21%, list=17%, signal=25%
REACTOME_MHC_CLASS_II_ANTIGEN_PRESENTATION	REACTOME_MHC_CLASS_II_ANTIGEN_PRESENTATION		76	0.27604	0.849384	0.673828	0.995622	1	2756	tags=28%, list=21%, signal=35%
REACTOME_TRANSCRIPTIONAL_REGULATION_OF_WHITE_ADIPOCYTE_DIFFERENTIATION	REACTOME_TRANSCRIPTIONAL_REGULATION_OF_WHITE_ADIPOCYTE_DIFFERENTIATION		49	0.267744	0.848863	0.726496	0.995871	1	3009	tags=35%, list=23%, signal=45%
GRYDER_PAX3FOXO1_ENHANCERS_KO_DOWN	GRYDER_PAX3FOXO1_ENHANCERS_KO_DOWN		316	0.21357	0.848146	0.779497	0.996543	1	2637	tags=24%, list=20%, signal=30%
YANG_BREAST_CANCER_ESR1_LASER_UP	YANG_BREAST_CANCER_ESR1_LASER_UP		29	0.302833	0.84813	0.714567	0.995588	1	3212	tags=41%, list=25%, signal=55%
YAO_HOXA10_TARGETS_VIA_PROGESTERONE_UP	YAO_HOXA10_TARGETS_VIA_PROGESTERONE_UP		67	0.284767	0.846496	0.73501	0.998552	1	1148	tags=13%, list=9%, signal=15%
PID_ERBB2_ERBB3_PATHWAY	PID_ERBB2_ERBB3_PATHWAY		42	0.227136	0.846304	0.693837	0.998031	1	2610	tags=26%, list=20%, signal=33%
FONTAINE_FOLLICULAR_THYROID_ADENOMA_DN	FONTAINE_FOLLICULAR_THYROID_ADENOMA_DN		57	0.263259	0.846149	0.735586	0.997409	1	3124	tags=37%, list=24%, signal=48%
BIOCARTA_INSULIN_PATHWAY	BIOCARTA_INSULIN_PATHWAY		22	0.264854	0.845842	0.682785	0.997133	1	1161	tags=14%, list=9%, signal=15%
BIOCARTA_AMI_PATHWAY	BIOCARTA_AMI_PATHWAY		19	0.371177	0.845741	0.680891	0.996401	1	1711	tags=37%, list=13%, signal=42%
NAGY_TFTC_COMPONENTS_HUMAN	NAGY_TFTC_COMPONENTS_HUMAN		16	0.315257	0.845488	0.651992	0.99602	1	3248	tags=38%, list=25%, signal=50%
PID_RAC1_REG_PATHWAY	PID_RAC1_REG_PATHWAY		31	0.272465	0.844977	0.708502	0.996274	1	822	tags=13%, list=6%, signal=14%
RASHI_RESPONSE_TO_IONIZING_RADIATION_5	RASHI_RESPONSE_TO_IONIZING_RADIATION_5		118	0.220332	0.844221	0.824242	0.99709	1	2217	tags=23%, list=17%, signal=27%
SA_CASPASE_CASCADE	SA_CASPASE_CASCADE		18	0.317905	0.843687	0.70428	0.997391	1	3664	tags=39%, list=28%, signal=54%
REACTOME_ANTIGEN_PRESENTATION_FOLDING_ASSEMBLY_AND_PEPTIDE_LOADING_OF_CLASS_I_MHC	REACTOME_ANTIGEN_PRESENTATION_FOLDING_ASSEMBLY_AND_PEPTIDE_LOADING_OF_CLASS_I_MHC		19	0.338264	0.843469	0.650505	0.996924	1	2566	tags=32%, list=20%, signal=39%
KOKKINAKIS_METHIONINE_DEPRIVATION_96HR_UP	KOKKINAKIS_METHIONINE_DEPRIVATION_96HR_UP		114	0.262835	0.843389	0.706439	0.996144	1	2475	tags=32%, list=19%, signal=39%
GROSS_HYPOXIA_VIA_ELK3_AND_HIF1A_DN	GROSS_HYPOXIA_VIA_ELK3_AND_HIF1A_DN		80	0.25832	0.842645	0.741313	0.996982	1	2198	tags=24%, list=17%, signal=28%
VALK_AML_CLUSTER_3	VALK_AML_CLUSTER_3		32	0.280602	0.841669	0.751553	0.998319	1	1972	tags=28%, list=15%, signal=33%
KIM_GERMINAL_CENTER_T_HELPER_DN	KIM_GERMINAL_CENTER_T_HELPER_DN		16	0.342801	0.841615	0.688017	0.99748	1	3474	tags=50%, list=27%, signal=68%
KYNG_ENVIRONMENTAL_STRESS_RESPONSE_NOT_BY_GAMMA_IN_OLD	KYNG_ENVIRONMENTAL_STRESS_RESPONSE_NOT_BY_GAMMA_IN_OLD		28	0.273278	0.841302	0.689723	0.997283	1	4159	tags=50%, list=32%, signal=73%
KEGG_P53_SIGNALING_PATHWAY	KEGG_P53_SIGNALING_PATHWAY		59	0.291401	0.840838	0.734127	0.997377	1	3730	tags=49%, list=29%, signal=69%
KARLSSON_TGFB1_TARGETS_UP	KARLSSON_TGFB1_TARGETS_UP		103	0.249095	0.840726	0.615854	0.996693	1	3611	tags=37%, list=28%, signal=51%
REACTOME_SIGNALLING_TO_ERKS	REACTOME_SIGNALLING_TO_ERKS		34	0.265057	0.840145	0.667961	0.997154	1	3671	tags=35%, list=28%, signal=49%
SHEPARD_CRUSH_AND_BURN_MUTANT_UP	SHEPARD_CRUSH_AND_BURN_MUTANT_UP		153	0.233197	0.839352	0.734568	0.998072	1	3059	tags=29%, list=23%, signal=37%
SENESE_HDAC2_TARGETS_UP	SENESE_HDAC2_TARGETS_UP		93	0.259949	0.839102	0.713726	0.997661	1	1811	tags=24%, list=14%, signal=27%
TCGA_GLIOBLASTOMA_COPY_NUMBER_UP	TCGA_GLIOBLASTOMA_COPY_NUMBER_UP		57	0.227389	0.8386	0.73444	0.997883	1	2461	tags=19%, list=19%, signal=24%
RUTELLA_RESPONSE_TO_HGF_UP	RUTELLA_RESPONSE_TO_HGF_UP		385	0.24408	0.837024	0.746212	1	1	1830	tags=21%, list=14%, signal=24%
BIOCARTA_CXCR4_PATHWAY	BIOCARTA_CXCR4_PATHWAY		22	0.283863	0.836677	0.702756	1	1	3170	tags=45%, list=24%, signal=60%
REACTOME_MYD88_MAL_CASCADE_INITIATED_ON_PLASMA_MEMBRANE	REACTOME_MYD88_MAL_CASCADE_INITIATED_ON_PLASMA_MEMBRANE		73	0.232417	0.836575	0.732535	0.999803	1	3277	tags=30%, list=25%, signal=40%
BROWNE_HCMV_INFECTION_24HR_UP	BROWNE_HCMV_INFECTION_24HR_UP		142	0.211882	0.836202	0.860082	0.999717	1	2292	tags=21%, list=18%, signal=25%
REACTOME_GLOBAL_GENOMIC_NER_GG_NER	REACTOME_GLOBAL_GENOMIC_NER_GG_NER		32	0.31283	0.836187	0.64503	0.998784	1	1995	tags=28%, list=15%, signal=33%
REACTOME_ANTIVIRAL_MECHANISM_BY_IFN_STIMULATED_GENES	REACTOME_ANTIVIRAL_MECHANISM_BY_IFN_STIMULATED_GENES		62	0.272716	0.835394	0.641283	0.999677	1	2272	tags=23%, list=17%, signal=27%
PENG_GLUCOSE_DEPRIVATION_DN	PENG_GLUCOSE_DEPRIVATION_DN		150	0.21014	0.835363	0.764244	0.998775	1	3047	tags=30%, list=23%, signal=39%
KAUFFMANN_DNA_REPAIR_GENES	KAUFFMANN_DNA_REPAIR_GENES		198	0.250673	0.834814	0.674797	0.999074	1	2198	tags=24%, list=17%, signal=29%
BOWIE_RESPONSE_TO_EXTRACELLULAR_MATRIX	BOWIE_RESPONSE_TO_EXTRACELLULAR_MATRIX		17	0.473051	0.834795	0.673077	0.998163	1	1186	tags=35%, list=9%, signal=39%
REACTOME_NUCLEAR_EVENTS_KINASE_AND_TRANSCRIPTION_FACTOR_ACTIVATION	REACTOME_NUCLEAR_EVENTS_KINASE_AND_TRANSCRIPTION_FACTOR_ACTIVATION		24	0.293437	0.8344	0.71977	0.998141	1	3506	tags=42%, list=27%, signal=57%
KYNG_WERNER_SYNDROM_AND_NORMAL_AGING_UP	KYNG_WERNER_SYNDROM_AND_NORMAL_AGING_UP		76	0.221416	0.834119	0.792233	0.997786	1	2949	tags=30%, list=23%, signal=39%
KEGG_STEROID_BIOSYNTHESIS	KEGG_STEROID_BIOSYNTHESIS		16	0.429039	0.834059	0.676829	0.996948	1	561	tags=25%, list=4%, signal=26%
ZHOU_TNF_SIGNALING_4HR	ZHOU_TNF_SIGNALING_4HR		48	0.293971	0.833434	0.723529	0.997475	1	1457	tags=23%, list=11%, signal=26%
VANHARANTA_UTERINE_FIBROID_WITH_7Q_DELETION_DN	VANHARANTA_UTERINE_FIBROID_WITH_7Q_DELETION_DN		34	0.254316	0.832798	0.685039	0.997987	1	2930	tags=24%, list=22%, signal=30%
PID_RHODOPSIN_PATHWAY	PID_RHODOPSIN_PATHWAY		21	0.282007	0.832603	0.665979	0.997509	1	2418	tags=24%, list=19%, signal=29%
BROWNE_HCMV_INFECTION_4HR_UP	BROWNE_HCMV_INFECTION_4HR_UP		52	0.265477	0.832502	0.683071	0.996783	1	1343	tags=19%, list=10%, signal=21%
WANG_RESPONSE_TO_BEXAROTENE_DN	WANG_RESPONSE_TO_BEXAROTENE_DN		23	0.299619	0.832261	0.704225	0.996403	1	1785	tags=26%, list=14%, signal=30%
MILI_PSEUDOPODIA_CHEMOTAXIS_DN	MILI_PSEUDOPODIA_CHEMOTAXIS_DN		365	0.211406	0.831122	0.782946	0.998153	1	2574	tags=23%, list=20%, signal=28%
VALK_AML_WITH_11Q23_REARRANGED	VALK_AML_WITH_11Q23_REARRANGED		20	0.303658	0.830269	0.714579	0.999156	1	2863	tags=30%, list=22%, signal=38%
IKEDA_MIR30_TARGETS_UP	IKEDA_MIR30_TARGETS_UP		100	0.233205	0.829137	0.74375	1	1	1456	tags=16%, list=11%, signal=18%
GENTILE_UV_RESPONSE_CLUSTER_D1	GENTILE_UV_RESPONSE_CLUSTER_D1		16	0.370673	0.828445	0.733059	1	1	2237	tags=38%, list=17%, signal=45%
CHEN_LVAD_SUPPORT_OF_FAILING_HEART_UP	CHEN_LVAD_SUPPORT_OF_FAILING_HEART_UP		97	0.289006	0.828372	0.705545	1	1	2085	tags=26%, list=16%, signal=30%
ZHU_CMV_ALL_UP	ZHU_CMV_ALL_UP		107	0.265559	0.827989	0.695146	1	1	2249	tags=26%, list=17%, signal=31%
NIKOLSKY_BREAST_CANCER_11Q12_Q14_AMPLICON	NIKOLSKY_BREAST_CANCER_11Q12_Q14_AMPLICON		101	0.247418	0.827238	0.709302	1	1	3673	tags=35%, list=28%, signal=48%
HAHTOLA_MYCOSIS_FUNGOIDES_CD4_UP	HAHTOLA_MYCOSIS_FUNGOIDES_CD4_UP		63	0.320528	0.825061	0.729339	1	1	2209	tags=33%, list=17%, signal=40%
BIOCARTA_MAL_PATHWAY	BIOCARTA_MAL_PATHWAY		18	0.237636	0.823608	0.699612	1	1	3170	tags=33%, list=24%, signal=44%
JOHNSTONE_PARVB_TARGETS_3_UP	JOHNSTONE_PARVB_TARGETS_3_UP		338	0.227829	0.823314	0.772983	1	1	2252	tags=23%, list=17%, signal=28%
PEDERSEN_METASTASIS_BY_ERBB2_ISOFORM_4	PEDERSEN_METASTASIS_BY_ERBB2_ISOFORM_4		78	0.258345	0.822802	0.80198	1	1	1854	tags=21%, list=14%, signal=24%
EPPERT_PROGENITOR	EPPERT_PROGENITOR		114	0.277249	0.820833	0.704918	1	1	1658	tags=21%, list=13%, signal=24%
YAGI_AML_WITH_11Q23_REARRANGED	YAGI_AML_WITH_11Q23_REARRANGED		330	0.194524	0.82069	0.906746	1	1	2924	tags=27%, list=22%, signal=34%
NIKOLSKY_BREAST_CANCER_20Q12_Q13_AMPLICON	NIKOLSKY_BREAST_CANCER_20Q12_Q13_AMPLICON		99	0.228082	0.820173	0.652083	1	1	2245	tags=21%, list=17%, signal=25%
ZHAN_MULTIPLE_MYELOMA_MF_DN	ZHAN_MULTIPLE_MYELOMA_MF_DN		23	0.295582	0.820168	0.744141	1	1	800	tags=17%, list=6%, signal=18%
REACTOME_RNA_POL_II_PRE_TRANSCRIPTION_EVENTS	REACTOME_RNA_POL_II_PRE_TRANSCRIPTION_EVENTS		57	0.257304	0.819506	0.663223	1	1	3525	tags=39%, list=27%, signal=53%
YAMAZAKI_TCEB3_TARGETS_DN	YAMAZAKI_TCEB3_TARGETS_DN		168	0.245484	0.819461	0.77381	1	1	1624	tags=20%, list=12%, signal=23%
HAMAI_APOPTOSIS_VIA_TRAIL_UP	HAMAI_APOPTOSIS_VIA_TRAIL_UP		476	0.240763	0.819292	0.738095	1	1	2710	tags=28%, list=21%, signal=34%
KRASNOSELSKAYA_ILF3_TARGETS_UP	KRASNOSELSKAYA_ILF3_TARGETS_UP		37	0.372553	0.819199	0.688976	1	1	1107	tags=22%, list=8%, signal=24%
HUNSBERGER_EXERCISE_REGULATED_GENES	HUNSBERGER_EXERCISE_REGULATED_GENES		30	0.275587	0.819092	0.759082	1	1	552	tags=10%, list=4%, signal=10%
RIGGINS_TAMOXIFEN_RESISTANCE_DN	RIGGINS_TAMOXIFEN_RESISTANCE_DN		200	0.243629	0.819035	0.881423	1	1	2607	tags=28%, list=20%, signal=34%
FLECHNER_PBL_KIDNEY_TRANSPLANT_REJECTED_VS_OK_UP	FLECHNER_PBL_KIDNEY_TRANSPLANT_REJECTED_VS_OK_UP		58	0.253345	0.818927	0.714008	1	1	2576	tags=29%, list=20%, signal=36%
LABBE_TARGETS_OF_TGFB1_AND_WNT3A_UP	LABBE_TARGETS_OF_TGFB1_AND_WNT3A_UP		99	0.239377	0.818754	0.789264	1	1	1830	tags=20%, list=14%, signal=23%
LABBE_TARGETS_OF_TGFB1_AND_WNT3A_DN	LABBE_TARGETS_OF_TGFB1_AND_WNT3A_DN		96	0.248108	0.817864	0.814532	1	1	1800	tags=20%, list=14%, signal=23%
GRADE_COLON_AND_RECTAL_CANCER_DN	GRADE_COLON_AND_RECTAL_CANCER_DN		75	0.24197	0.817859	0.776471	1	1	1001	tags=12%, list=8%, signal=13%
LOCKWOOD_AMPLIFIED_IN_LUNG_CANCER	LOCKWOOD_AMPLIFIED_IN_LUNG_CANCER		168	0.230652	0.817363	0.747475	1	1	3657	tags=36%, list=28%, signal=49%
REACTOME_THROMBOXANE_SIGNALLING_THROUGH_TP_RECEPTOR	REACTOME_THROMBOXANE_SIGNALLING_THROUGH_TP_RECEPTOR		20	0.252805	0.81725	0.713726	1	1	3338	tags=35%, list=26%, signal=47%
WATANABE_COLON_CANCER_MSI_VS_MSS_DN	WATANABE_COLON_CANCER_MSI_VS_MSS_DN		56	0.253509	0.816507	0.837113	1	1	1762	tags=21%, list=14%, signal=25%
MARTINEZ_RESPONSE_TO_TRABECTEDIN_UP	MARTINEZ_RESPONSE_TO_TRABECTEDIN_UP		64	0.234828	0.816163	0.735922	1	1	3214	tags=31%, list=25%, signal=41%
BIOCARTA_BARRESTIN_SRC_PATHWAY	BIOCARTA_BARRESTIN_SRC_PATHWAY		15	0.270025	0.815694	0.694391	1	1	3170	tags=33%, list=24%, signal=44%
PID_P38_MKK3_6PATHWAY	PID_P38_MKK3_6PATHWAY		23	0.271455	0.815466	0.746032	1	1	3506	tags=43%, list=27%, signal=59%
AMIT_SERUM_RESPONSE_240_MCF10A	AMIT_SERUM_RESPONSE_240_MCF10A		55	0.28917	0.815435	0.7749	1	1	670	tags=16%, list=5%, signal=17%
KEGG_RNA_POLYMERASE	KEGG_RNA_POLYMERASE		22	0.267509	0.815168	0.672098	1	1	2053	tags=27%, list=16%, signal=32%
RAY_TUMORIGENESIS_BY_ERBB2_CDC25A_DN	RAY_TUMORIGENESIS_BY_ERBB2_CDC25A_DN		122	0.234878	0.815149	0.85102	1	1	2272	tags=23%, list=17%, signal=28%
PID_ARF6_TRAFFICKING_PATHWAY	PID_ARF6_TRAFFICKING_PATHWAY		43	0.231853	0.813964	0.791907	1	1	1833	tags=21%, list=14%, signal=24%
VARELA_ZMPSTE24_TARGETS_UP	VARELA_ZMPSTE24_TARGETS_UP		34	0.31409	0.813471	0.744094	1	1	2237	tags=24%, list=17%, signal=28%
IVANOVSKA_MIR106B_TARGETS	IVANOVSKA_MIR106B_TARGETS		68	0.256167	0.813173	0.778218	1	1	3331	tags=38%, list=26%, signal=51%
REACTOME_ACTIVATION_OF_GENES_BY_ATF4	REACTOME_ACTIVATION_OF_GENES_BY_ATF4		21	0.293235	0.811953	0.765957	1	1	2769	tags=38%, list=21%, signal=48%
SWEET_KRAS_TARGETS_DN	SWEET_KRAS_TARGETS_DN		63	0.240545	0.809704	0.84086	1	1	2887	tags=33%, list=22%, signal=43%
BIOCARTA_GH_PATHWAY	BIOCARTA_GH_PATHWAY		26	0.238299	0.809535	0.739563	1	1	1762	tags=19%, list=14%, signal=22%
KEGG_PATHOGENIC_ESCHERICHIA_COLI_INFECTION	KEGG_PATHOGENIC_ESCHERICHIA_COLI_INFECTION		44	0.257638	0.809525	0.74856	1	1	749	tags=14%, list=6%, signal=14%
ZHAN_V2_LATE_DIFFERENTIATION_GENES	ZHAN_V2_LATE_DIFFERENTIATION_GENES		43	0.26197	0.809343	0.75502	1	1	2796	tags=30%, list=21%, signal=38%
KYNG_DNA_DAMAGE_DN	KYNG_DNA_DAMAGE_DN		181	0.233177	0.809273	0.792415	1	1	3070	tags=32%, list=24%, signal=41%
SESTO_RESPONSE_TO_UV_C4	SESTO_RESPONSE_TO_UV_C4		16	0.286054	0.809072	0.71063	1	1	843	tags=13%, list=6%, signal=13%
PID_HIF1_TFPATHWAY	PID_HIF1_TFPATHWAY		61	0.281494	0.808646	0.753564	1	1	1360	tags=23%, list=10%, signal=26%
KEGG_ENDOMETRIAL_CANCER	KEGG_ENDOMETRIAL_CANCER		50	0.23363	0.808203	0.786693	1	1	2515	tags=28%, list=19%, signal=35%
BIOCARTA_PGC1A_PATHWAY	BIOCARTA_PGC1A_PATHWAY		22	0.252232	0.807856	0.735849	1	1	3465	tags=32%, list=27%, signal=43%
SHAFFER_IRF4_MULTIPLE_MYELOMA_PROGRAM	SHAFFER_IRF4_MULTIPLE_MYELOMA_PROGRAM		34	0.285971	0.807831	0.745247	1	1	1658	tags=24%, list=13%, signal=27%
IRITANI_MAD1_TARGETS_DN	IRITANI_MAD1_TARGETS_DN		38	0.256549	0.807665	0.662083	1	1	3124	tags=32%, list=24%, signal=41%
HELLER_HDAC_TARGETS_UP	HELLER_HDAC_TARGETS_UP		288	0.216777	0.807475	0.937864	1	1	1396	tags=14%, list=11%, signal=16%
NAM_FXYD5_TARGETS_DN	NAM_FXYD5_TARGETS_DN		16	0.327349	0.807311	0.69703	1	1	3036	tags=44%, list=23%, signal=57%
RODRIGUES_THYROID_CARCINOMA_POORLY_DIFFERENTIATED_UP	RODRIGUES_THYROID_CARCINOMA_POORLY_DIFFERENTIATED_UP		471	0.273252	0.807294	0.672	1	1	2231	tags=26%, list=17%, signal=30%
BIOCARTA_IGF1_PATHWAY	BIOCARTA_IGF1_PATHWAY		21	0.270267	0.806372	0.75442	1	1	2550	tags=29%, list=20%, signal=35%
DEURIG_T_CELL_PROLYMPHOCYTIC_LEUKEMIA_UP	DEURIG_T_CELL_PROLYMPHOCYTIC_LEUKEMIA_UP		332	0.207505	0.805873	0.891837	1	1	2346	tags=22%, list=18%, signal=26%
LINDGREN_BLADDER_CANCER_CLUSTER_1_UP	LINDGREN_BLADDER_CANCER_CLUSTER_1_UP		86	0.238321	0.804469	0.773504	1	1	1279	tags=15%, list=10%, signal=17%
YAO_TEMPORAL_RESPONSE_TO_PROGESTERONE_CLUSTER_0	YAO_TEMPORAL_RESPONSE_TO_PROGESTERONE_CLUSTER_0		64	0.258964	0.803816	0.840637	1	1	1495	tags=22%, list=11%, signal=25%
PID_P75_NTR_PATHWAY	PID_P75_NTR_PATHWAY		62	0.227732	0.803669	0.824111	1	1	2610	tags=26%, list=20%, signal=32%
CREIGHTON_ENDOCRINE_THERAPY_RESISTANCE_4	CREIGHTON_ENDOCRINE_THERAPY_RESISTANCE_4		215	0.219341	0.803663	0.915323	1	1	1698	tags=18%, list=13%, signal=20%
REACTOME_MRNA_3_END_PROCESSING	REACTOME_MRNA_3_END_PROCESSING		21	0.308378	0.802679	0.713376	1	1	2909	tags=38%, list=22%, signal=49%
REACTOME_SIGNALING_BY_INSULIN_RECEPTOR	REACTOME_SIGNALING_BY_INSULIN_RECEPTOR		88	0.200495	0.802286	0.806706	1	1	2225	tags=22%, list=17%, signal=26%
RUTELLA_RESPONSE_TO_HGF_VS_CSF2RB_AND_IL4_UP	RUTELLA_RESPONSE_TO_HGF_VS_CSF2RB_AND_IL4_UP		367	0.245711	0.801356	0.77821	1	1	1761	tags=21%, list=14%, signal=24%
PID_HDAC_CLASSII_PATHWAY	PID_HDAC_CLASSII_PATHWAY		30	0.227346	0.801297	0.75	1	1	2506	tags=23%, list=19%, signal=29%
MIKKELSEN_ES_HCP_WITH_H3_UNMETHYLATED	MIKKELSEN_ES_HCP_WITH_H3_UNMETHYLATED		35	0.248411	0.801249	0.78373	1	1	2058	tags=17%, list=16%, signal=20%
PROVENZANI_METASTASIS_UP	PROVENZANI_METASTASIS_UP		173	0.237607	0.800932	0.803119	1	1	1802	tags=22%, list=14%, signal=25%
REACTOME_RNA_POL_III_TRANSCRIPTION_INITIATION_FROM_TYPE_3_PROMOTER	REACTOME_RNA_POL_III_TRANSCRIPTION_INITIATION_FROM_TYPE_3_PROMOTER		23	0.278008	0.800908	0.705645	1	1	2014	tags=30%, list=15%, signal=36%
GOLUB_ALL_VS_AML_DN	GOLUB_ALL_VS_AML_DN		23	0.274103	0.799827	0.741874	1	1	991	tags=13%, list=8%, signal=14%
NIELSEN_GIST_VS_SYNOVIAL_SARCOMA_DN	NIELSEN_GIST_VS_SYNOVIAL_SARCOMA_DN		17	0.357975	0.799709	0.763736	1	1	1395	tags=24%, list=11%, signal=26%
FLECHNER_PBL_KIDNEY_TRANSPLANT_OK_VS_DONOR_UP	FLECHNER_PBL_KIDNEY_TRANSPLANT_OK_VS_DONOR_UP		142	0.203356	0.799701	0.796443	1	1	3304	tags=30%, list=25%, signal=40%
SHEDDEN_LUNG_CANCER_GOOD_SURVIVAL_A4	SHEDDEN_LUNG_CANCER_GOOD_SURVIVAL_A4		177	0.214645	0.799633	0.908571	1	1	1980	tags=17%, list=15%, signal=20%
BHAT_ESR1_TARGETS_NOT_VIA_AKT1_UP	BHAT_ESR1_TARGETS_NOT_VIA_AKT1_UP		151	0.208873	0.799576	0.902196	1	1	683	tags=9%, list=5%, signal=10%
REACTOME_RNA_POL_III_TRANSCRIPTION	REACTOME_RNA_POL_III_TRANSCRIPTION		30	0.258591	0.798867	0.6875	1	1	2014	tags=27%, list=15%, signal=31%
PID_WNT_CANONICAL_PATHWAY	PID_WNT_CANONICAL_PATHWAY		17	0.279776	0.798146	0.735417	1	1	3452	tags=35%, list=26%, signal=48%
BIOCARTA_COMP_PATHWAY	BIOCARTA_COMP_PATHWAY		16	0.411075	0.79674	0.688976	1	1	1979	tags=31%, list=15%, signal=37%
REACTOME_G1_S_TRANSITION	REACTOME_G1_S_TRANSITION		96	0.280732	0.796719	0.673469	1	1	2827	tags=34%, list=22%, signal=44%
HEIDENBLAD_AMPLICON_12P11_12_DN	HEIDENBLAD_AMPLICON_12P11_12_DN		15	0.317357	0.796094	0.748538	1	1	2576	tags=40%, list=20%, signal=50%
SUNG_METASTASIS_STROMA_UP	SUNG_METASTASIS_STROMA_UP		92	0.254808	0.795996	0.824092	1	1	2154	tags=26%, list=17%, signal=31%
DAZARD_RESPONSE_TO_UV_NHEK_UP	DAZARD_RESPONSE_TO_UV_NHEK_UP		225	0.211989	0.795751	0.865497	1	1	2619	tags=24%, list=20%, signal=29%
DARWICHE_PAPILLOMA_RISK_LOW_UP	DARWICHE_PAPILLOMA_RISK_LOW_UP		123	0.204339	0.795324	0.85687	1	1	1594	tags=16%, list=12%, signal=18%
ODONNELL_TFRC_TARGETS_UP	ODONNELL_TFRC_TARGETS_UP		287	0.202925	0.795008	0.876471	1	1	878	tags=10%, list=7%, signal=11%
GARGALOVIC_RESPONSE_TO_OXIDIZED_PHOSPHOLIPIDS_RED_DN	GARGALOVIC_RESPONSE_TO_OXIDIZED_PHOSPHOLIPIDS_RED_DN		16	0.315713	0.79479	0.793522	1	1	1761	tags=31%, list=14%, signal=36%
BROWNE_HCMV_INFECTION_4HR_DN	BROWNE_HCMV_INFECTION_4HR_DN		228	0.172009	0.793775	0.949799	1	1	2695	tags=21%, list=21%, signal=26%
JAEGER_METASTASIS_DN	JAEGER_METASTASIS_DN		243	0.25317	0.793576	0.819473	1	1	1963	tags=19%, list=15%, signal=22%
CAFFAREL_RESPONSE_TO_THC_DN	CAFFAREL_RESPONSE_TO_THC_DN		24	0.344471	0.793561	0.71875	1	1	561	tags=17%, list=4%, signal=17%
GROSS_HYPOXIA_VIA_ELK3_UP	GROSS_HYPOXIA_VIA_ELK3_UP		167	0.232573	0.793474	0.837255	1	1	2738	tags=29%, list=21%, signal=37%
MCBRYAN_PUBERTAL_BREAST_3_4WK_UP	MCBRYAN_PUBERTAL_BREAST_3_4WK_UP		175	0.23672	0.793471	0.89703	1	1	1761	tags=19%, list=14%, signal=22%
BIOCARTA_IL10_PATHWAY	BIOCARTA_IL10_PATHWAY		17	0.317307	0.793412	0.722543	1	1	2396	tags=35%, list=18%, signal=43%
REACTOME_RECYCLING_PATHWAY_OF_L1	REACTOME_RECYCLING_PATHWAY_OF_L1		24	0.261753	0.793228	0.77027	1	1	3030	tags=29%, list=23%, signal=38%
BOYLAN_MULTIPLE_MYELOMA_C_D_UP	BOYLAN_MULTIPLE_MYELOMA_C_D_UP		98	0.222171	0.792965	0.854806	1	1	2352	tags=23%, list=18%, signal=28%
BIOCARTA_IL6_PATHWAY	BIOCARTA_IL6_PATHWAY		22	0.259764	0.792669	0.736842	1	1	3671	tags=45%, list=28%, signal=63%
REACTOME_INTERFERON_ALPHA_BETA_SIGNALING	REACTOME_INTERFERON_ALPHA_BETA_SIGNALING		59	0.30275	0.792583	0.670565	1	1	970	tags=15%, list=7%, signal=16%
DORSAM_HOXA9_TARGETS_DN	DORSAM_HOXA9_TARGETS_DN		31	0.264474	0.791897	0.808678	1	1	2038	tags=19%, list=16%, signal=23%
ZHONG_SECRETOME_OF_LUNG_CANCER_AND_ENDOTHELIUM	ZHONG_SECRETOME_OF_LUNG_CANCER_AND_ENDOTHELIUM		61	0.247467	0.790685	0.807183	1	1	3724	tags=41%, list=29%, signal=57%
REACTOME_INNATE_IMMUNE_SYSTEM	REACTOME_INNATE_IMMUNE_SYSTEM		207	0.220461	0.790433	0.814516	1	1	2003	tags=18%, list=15%, signal=21%
VETTER_TARGETS_OF_PRKCA_AND_ETS1_UP	VETTER_TARGETS_OF_PRKCA_AND_ETS1_UP		16	0.293287	0.790397	0.758621	1	1	23	tags=6%, list=0%, signal=6%
REACTOME_RIP_MEDIATED_NFKB_ACTIVATION_VIA_DAI	REACTOME_RIP_MEDIATED_NFKB_ACTIVATION_VIA_DAI		17	0.290816	0.788909	0.756592	1	1	2739	tags=35%, list=21%, signal=45%
ENK_UV_RESPONSE_EPIDERMIS_UP	ENK_UV_RESPONSE_EPIDERMIS_UP		271	0.206467	0.788908	0.886274	1	1	2179	tags=19%, list=17%, signal=23%
LOPEZ_EPITHELIOID_MESOTHELIOMA	LOPEZ_EPITHELIOID_MESOTHELIOMA		16	0.338217	0.788766	0.756048	1	1	3549	tags=38%, list=27%, signal=51%
PID_EPHB_FWD_PATHWAY	PID_EPHB_FWD_PATHWAY		40	0.22383	0.788729	0.806061	1	1	1161	tags=13%, list=9%, signal=14%
KOBAYASHI_EGFR_SIGNALING_24HR_UP	KOBAYASHI_EGFR_SIGNALING_24HR_UP		93	0.250905	0.788331	0.859719	1	1	2832	tags=31%, list=22%, signal=40%
WEST_ADRENOCORTICAL_TUMOR_UP	WEST_ADRENOCORTICAL_TUMOR_UP		269	0.268936	0.788126	0.704724	1	1	3129	tags=37%, list=24%, signal=48%
KAN_RESPONSE_TO_ARSENIC_TRIOXIDE	KAN_RESPONSE_TO_ARSENIC_TRIOXIDE		115	0.280787	0.787274	0.861272	1	1	2381	tags=26%, list=18%, signal=32%
KENNY_CTNNB1_TARGETS_DN	KENNY_CTNNB1_TARGETS_DN		42	0.242829	0.787168	0.831325	1	1	1823	tags=21%, list=14%, signal=25%
PID_VEGFR1_2_PATHWAY	PID_VEGFR1_2_PATHWAY		67	0.213304	0.787139	0.79017	1	1	2737	tags=27%, list=21%, signal=34%
BROWNE_HCMV_INFECTION_6HR_UP	BROWNE_HCMV_INFECTION_6HR_UP		66	0.229319	0.786403	0.850807	1	1	1908	tags=18%, list=15%, signal=21%
REACTOME_ELONGATION_ARREST_AND_RECOVERY	REACTOME_ELONGATION_ARREST_AND_RECOVERY		30	0.243383	0.785309	0.666667	1	1	3525	tags=37%, list=27%, signal=50%
RICKMAN_TUMOR_DIFFERENTIATED_WELL_VS_MODERATELY_DN	RICKMAN_TUMOR_DIFFERENTIATED_WELL_VS_MODERATELY_DN		81	0.243138	0.7853	0.739754	1	1	1099	tags=14%, list=8%, signal=15%
YORDY_RECIPROCAL_REGULATION_BY_ETS1_AND_SP100_DN	YORDY_RECIPROCAL_REGULATION_BY_ETS1_AND_SP100_DN		68	0.238749	0.785011	0.853755	1	1	969	tags=10%, list=7%, signal=11%
REACTOME_ADAPTIVE_IMMUNE_SYSTEM	REACTOME_ADAPTIVE_IMMUNE_SYSTEM		428	0.196761	0.784781	0.776892	1	1	2989	tags=26%, list=23%, signal=33%
CHEN_LVAD_SUPPORT_OF_FAILING_HEART_DN	CHEN_LVAD_SUPPORT_OF_FAILING_HEART_DN		41	0.295474	0.784629	0.834025	0.99996	1	976	tags=20%, list=7%, signal=21%
GERY_CEBP_TARGETS	GERY_CEBP_TARGETS		110	0.261519	0.783844	0.863727	1	1	1696	tags=21%, list=13%, signal=24%
PID_INSULIN_PATHWAY	PID_INSULIN_PATHWAY		42	0.229037	0.783325	0.818713	1	1	1914	tags=17%, list=15%, signal=19%
SEMENZA_HIF1_TARGETS	SEMENZA_HIF1_TARGETS		34	0.302442	0.783097	0.790356	1	1	1041	tags=18%, list=8%, signal=19%
ZHANG_BREAST_CANCER_PROGENITORS_UP	ZHANG_BREAST_CANCER_PROGENITORS_UP		295	0.24753	0.782449	0.715726	1	1	2655	tags=27%, list=20%, signal=33%
GAVIN_FOXP3_TARGETS_CLUSTER_T4	GAVIN_FOXP3_TARGETS_CLUSTER_T4		74	0.249858	0.782118	0.81409	1	1	2737	tags=30%, list=21%, signal=37%
GOLUB_ALL_VS_AML_UP	GOLUB_ALL_VS_AML_UP		24	0.245671	0.780434	0.806517	1	1	1688	tags=17%, list=13%, signal=19%
REACTOME_SIGNALING_BY_SCF_KIT	REACTOME_SIGNALING_BY_SCF_KIT		65	0.201621	0.780359	0.824903	1	1	2515	tags=25%, list=19%, signal=30%
PID_VEGFR1_PATHWAY	PID_VEGFR1_PATHWAY		25	0.253606	0.779643	0.7251	1	1	728	tags=8%, list=6%, signal=8%
MOROSETTI_FACIOSCAPULOHUMERAL_MUSCULAR_DISTROPHY_UP	MOROSETTI_FACIOSCAPULOHUMERAL_MUSCULAR_DISTROPHY_UP		20	0.362087	0.779619	0.8	1	1	571	tags=25%, list=4%, signal=26%
BIOCARTA_GPCR_PATHWAY	BIOCARTA_GPCR_PATHWAY		32	0.230108	0.779181	0.784314	1	1	2386	tags=25%, list=18%, signal=31%
PEDERSEN_METASTASIS_BY_ERBB2_ISOFORM_6	PEDERSEN_METASTASIS_BY_ERBB2_ISOFORM_6		21	0.329645	0.77904	0.863724	1	1	1176	tags=19%, list=9%, signal=21%
YAMAZAKI_TCEB3_TARGETS_UP	YAMAZAKI_TCEB3_TARGETS_UP		148	0.237896	0.778842	0.838461	1	1	2094	tags=23%, list=16%, signal=27%
REACTOME_FORMATION_OF_RNA_POL_II_ELONGATION_COMPLEX_	REACTOME_FORMATION_OF_RNA_POL_II_ELONGATION_COMPLEX_		41	0.248947	0.778668	0.711967	1	1	3688	tags=39%, list=28%, signal=54%
HIRSCH_CELLULAR_TRANSFORMATION_SIGNATURE_UP	HIRSCH_CELLULAR_TRANSFORMATION_SIGNATURE_UP		220	0.24279	0.778183	0.834	1	1	1730	tags=20%, list=13%, signal=23%
REACTOME_REGULATION_OF_INSULIN_LIKE_GROWTH_FACTOR_IGF_ACTIVITY_BY_INSULIN_LIKE_GROWTH_FACTOR_BINDING_PROTEINS_IGFBPS	REACTOME_REGULATION_OF_INSULIN_LIKE_GROWTH_FACTOR_IGF_ACTIVITY_BY_INSULIN_LIKE_GROWTH_FACTOR_BINDING_PROTEINS_IGFBPS		16	0.342919	0.77763	0.801527	1	1	2769	tags=44%, list=21%, signal=55%
BOWIE_RESPONSE_TO_TAMOXIFEN	BOWIE_RESPONSE_TO_TAMOXIFEN		17	0.434242	0.777578	0.718631	0.999893	1	571	tags=29%, list=4%, signal=31%
LEE_AGING_MUSCLE_DN	LEE_AGING_MUSCLE_DN		40	0.259866	0.777157	0.82218	0.999843	1	1938	tags=25%, list=15%, signal=29%
SMID_BREAST_CANCER_RELAPSE_IN_LUNG_DN	SMID_BREAST_CANCER_RELAPSE_IN_LUNG_DN		36	0.317806	0.77678	0.786853	0.999733	1	2206	tags=28%, list=17%, signal=33%
NADLER_HYPERGLYCEMIA_AT_OBESITY	NADLER_HYPERGLYCEMIA_AT_OBESITY		52	0.212466	0.776719	0.84466	0.998998	1	1327	tags=13%, list=10%, signal=15%
HILLION_HMGA1_TARGETS	HILLION_HMGA1_TARGETS		86	0.203246	0.776361	0.774567	0.998812	1	2977	tags=24%, list=23%, signal=31%
HUANG_FOXA2_TARGETS_DN	HUANG_FOXA2_TARGETS_DN		36	0.299368	0.774974	0.778865	1	1	815	tags=14%, list=6%, signal=15%
REACTOME_CLASS_B_2_SECRETIN_FAMILY_RECEPTORS	REACTOME_CLASS_B_2_SECRETIN_FAMILY_RECEPTORS		76	0.208814	0.77495	0.853516	0.999869	1	2493	tags=20%, list=19%, signal=24%
VISALA_AGING_LYMPHOCYTE_DN	VISALA_AGING_LYMPHOCYTE_DN		15	0.323642	0.774535	0.781746	0.999761	1	490	tags=13%, list=4%, signal=14%
HILLION_HMGA1B_TARGETS	HILLION_HMGA1B_TARGETS		86	0.205976	0.774086	0.826667	0.99976	1	2890	tags=27%, list=22%, signal=34%
ST_GA13_PATHWAY	ST_GA13_PATHWAY		36	0.233612	0.772845	0.805274	1	1	995	tags=11%, list=8%, signal=12%
WENDT_COHESIN_TARGETS_UP	WENDT_COHESIN_TARGETS_UP		25	0.288504	0.772819	0.777551	1	1	2520	tags=36%, list=19%, signal=45%
KYNG_WERNER_SYNDROM_DN	KYNG_WERNER_SYNDROM_DN		17	0.282265	0.772353	0.785156	1	1	4049	tags=47%, list=31%, signal=68%
REACTOME_MAPK_TARGETS_NUCLEAR_EVENTS_MEDIATED_BY_MAP_KINASES	REACTOME_MAPK_TARGETS_NUCLEAR_EVENTS_MEDIATED_BY_MAP_KINASES		30	0.264391	0.771329	0.815686	1	1	3506	tags=37%, list=27%, signal=50%
COATES_MACROPHAGE_M1_VS_M2_DN	COATES_MACROPHAGE_M1_VS_M2_DN		54	0.267565	0.771029	0.878968	1	1	2556	tags=33%, list=20%, signal=41%
MONNIER_POSTRADIATION_TUMOR_ESCAPE_UP	MONNIER_POSTRADIATION_TUMOR_ESCAPE_UP		296	0.202561	0.769543	0.871744	1	1	2670	tags=25%, list=20%, signal=31%
DELACROIX_RAR_TARGETS_DN	DELACROIX_RAR_TARGETS_DN		19	0.305955	0.768799	0.800759	1	1	604	tags=16%, list=5%, signal=17%
JI_METASTASIS_REPRESSED_BY_STK11	JI_METASTASIS_REPRESSED_BY_STK11		24	0.307723	0.768699	0.837524	1	1	2126	tags=29%, list=16%, signal=35%
REACTOME_GRB2_EVENTS_IN_ERBB2_SIGNALING	REACTOME_GRB2_EVENTS_IN_ERBB2_SIGNALING		20	0.279535	0.768416	0.803644	1	1	3170	tags=40%, list=24%, signal=53%
RIGGINS_TAMOXIFEN_RESISTANCE_UP	RIGGINS_TAMOXIFEN_RESISTANCE_UP		65	0.251816	0.768188	0.867961	1	1	2927	tags=28%, list=22%, signal=36%
AIYAR_COBRA1_TARGETS_UP	AIYAR_COBRA1_TARGETS_UP		36	0.269804	0.767364	0.842105	1	1	2025	tags=25%, list=16%, signal=30%
BRACHAT_RESPONSE_TO_METHOTREXATE_UP	BRACHAT_RESPONSE_TO_METHOTREXATE_UP		20	0.285086	0.766929	0.831663	1	1	1471	tags=25%, list=11%, signal=28%
ROSS_AML_OF_FAB_M7_TYPE	ROSS_AML_OF_FAB_M7_TYPE		66	0.222245	0.766247	0.869823	1	1	2068	tags=21%, list=16%, signal=25%
BOYAULT_LIVER_CANCER_SUBCLASS_G3_UP	BOYAULT_LIVER_CANCER_SUBCLASS_G3_UP		161	0.299738	0.765814	0.698381	1	1	2431	tags=27%, list=19%, signal=32%
CHANGOLKAR_H2AFY_TARGETS_UP	CHANGOLKAR_H2AFY_TARGETS_UP		26	0.266671	0.765574	0.850485	1	1	2633	tags=27%, list=20%, signal=34%
BACOLOD_RESISTANCE_TO_ALKYLATING_AGENTS_UP	BACOLOD_RESISTANCE_TO_ALKYLATING_AGENTS_UP		23	0.313955	0.765561	0.845098	1	1	2103	tags=30%, list=16%, signal=36%
INGRAM_SHH_TARGETS_UP	INGRAM_SHH_TARGETS_UP		99	0.237142	0.765104	0.838835	1	1	1914	tags=19%, list=15%, signal=22%
REACTOME_TOLL_RECEPTOR_CASCADES	REACTOME_TOLL_RECEPTOR_CASCADES		100	0.212215	0.764483	0.855422	1	1	2764	tags=25%, list=21%, signal=31%
BROWNE_HCMV_INFECTION_20HR_DN	BROWNE_HCMV_INFECTION_20HR_DN		99	0.234651	0.764367	0.882129	1	1	1007	tags=12%, list=8%, signal=13%
WANG_BARRETTS_ESOPHAGUS_AND_ESOPHAGUS_CANCER_UP	WANG_BARRETTS_ESOPHAGUS_AND_ESOPHAGUS_CANCER_UP		24	0.304839	0.764354	0.847784	1	1	627	tags=17%, list=5%, signal=17%
YAUCH_HEDGEHOG_SIGNALING_PARACRINE_UP	YAUCH_HEDGEHOG_SIGNALING_PARACRINE_UP		98	0.206676	0.763448	0.912779	1	1	1253	tags=11%, list=10%, signal=12%
PENG_RAPAMYCIN_RESPONSE_UP	PENG_RAPAMYCIN_RESPONSE_UP		184	0.196	0.763163	0.896282	1	1	2511	tags=24%, list=19%, signal=29%
MILI_PSEUDOPODIA_HAPTOTAXIS_DN	MILI_PSEUDOPODIA_HAPTOTAXIS_DN		482	0.199079	0.763096	0.883858	1	1	2388	tags=21%, list=18%, signal=25%
NADERI_BREAST_CANCER_PROGNOSIS_DN	NADERI_BREAST_CANCER_PROGNOSIS_DN		16	0.318847	0.762996	0.815041	0.999957	1	3861	tags=50%, list=30%, signal=71%
IWANAGA_CARCINOGENESIS_BY_KRAS_DN	IWANAGA_CARCINOGENESIS_BY_KRAS_DN		89	0.202565	0.762763	0.939203	0.999532	1	968	tags=11%, list=7%, signal=12%
CADWELL_ATG16L1_TARGETS_UP	CADWELL_ATG16L1_TARGETS_UP		67	0.258179	0.762587	0.858268	0.999012	1	2549	tags=30%, list=20%, signal=37%
MCCLUNG_COCAIN_REWARD_4WK	MCCLUNG_COCAIN_REWARD_4WK		65	0.207303	0.762525	0.904167	0.998291	1	1464	tags=15%, list=11%, signal=17%
VALK_AML_CLUSTER_16	VALK_AML_CLUSTER_16		25	0.263247	0.762498	0.817248	0.997509	1	2863	tags=32%, list=22%, signal=41%
BIOCARTA_IGF1R_PATHWAY	BIOCARTA_IGF1R_PATHWAY		23	0.241845	0.762026	0.795678	0.997512	1	3671	tags=43%, list=28%, signal=60%
REACTOME_THROMBIN_SIGNALLING_THROUGH_PROTEINASE_ACTIVATED_RECEPTORS_PARS	REACTOME_THROMBIN_SIGNALLING_THROUGH_PROTEINASE_ACTIVATED_RECEPTORS_PARS		28	0.216846	0.762011	0.818182	0.996711	1	3338	tags=32%, list=26%, signal=43%
GARGALOVIC_RESPONSE_TO_OXIDIZED_PHOSPHOLIPIDS_BLUE_UP	GARGALOVIC_RESPONSE_TO_OXIDIZED_PHOSPHOLIPIDS_BLUE_UP		90	0.220387	0.761861	0.866267	0.99615	1	3862	tags=40%, list=30%, signal=56%
WILLIAMS_ESR2_TARGETS_UP	WILLIAMS_ESR2_TARGETS_UP		18	0.281609	0.760978	0.804527	0.996985	1	1037	tags=17%, list=8%, signal=18%
REACTOME_CYTOSOLIC_TRNA_AMINOACYLATION	REACTOME_CYTOSOLIC_TRNA_AMINOACYLATION		20	0.282991	0.760884	0.654691	0.996307	1	3233	tags=40%, list=25%, signal=53%
KYNG_ENVIRONMENTAL_STRESS_RESPONSE_NOT_BY_UV_IN_OLD	KYNG_ENVIRONMENTAL_STRESS_RESPONSE_NOT_BY_UV_IN_OLD		19	0.28959	0.760704	0.815261	0.995799	1	4	tags=5%, list=0%, signal=5%
CHEBOTAEV_GR_TARGETS_UP	CHEBOTAEV_GR_TARGETS_UP		61	0.242229	0.760432	0.911368	0.995445	1	2198	tags=25%, list=17%, signal=29%
SESTO_RESPONSE_TO_UV_C1	SESTO_RESPONSE_TO_UV_C1		65	0.235356	0.760323	0.830677	0.994819	1	3105	tags=37%, list=24%, signal=48%
BROWN_MYELOID_CELL_DEVELOPMENT_DN	BROWN_MYELOID_CELL_DEVELOPMENT_DN		109	0.213094	0.759954	0.928862	0.994609	1	2305	tags=20%, list=18%, signal=24%
LAIHO_COLORECTAL_CANCER_SERRATED_UP	LAIHO_COLORECTAL_CANCER_SERRATED_UP		106	0.240944	0.759905	0.772636	0.993864	1	2999	tags=33%, list=23%, signal=43%
HAN_JNK_SINGALING_DN	HAN_JNK_SINGALING_DN		32	0.304527	0.759565	0.852525	0.993603	1	1904	tags=31%, list=15%, signal=37%
KEGG_SPLICEOSOME	KEGG_SPLICEOSOME		85	0.232688	0.759109	0.702213	0.9936	1	4219	tags=44%, list=32%, signal=64%
CHIARADONNA_NEOPLASTIC_TRANSFORMATION_KRAS_DN	CHIARADONNA_NEOPLASTIC_TRANSFORMATION_KRAS_DN		126	0.259812	0.758989	0.831041	0.992985	1	1536	tags=21%, list=12%, signal=24%
STONER_ESOPHAGEAL_CARCINOGENESIS_UP	STONER_ESOPHAGEAL_CARCINOGENESIS_UP		28	0.214676	0.757674	0.807322	0.994333	1	4150	tags=43%, list=32%, signal=63%
CHANG_CORE_SERUM_RESPONSE_DN	CHANG_CORE_SERUM_RESPONSE_DN		159	0.224624	0.757362	0.910751	0.994036	1	2619	tags=28%, list=20%, signal=34%
KANNAN_TP53_TARGETS_UP	KANNAN_TP53_TARGETS_UP		52	0.250209	0.757326	0.832669	0.993274	1	2085	tags=23%, list=16%, signal=27%
ST_FAS_SIGNALING_PATHWAY	ST_FAS_SIGNALING_PATHWAY		58	0.19951	0.757076	0.894	0.992857	1	3664	tags=34%, list=28%, signal=48%
REACTOME_METABOLISM_OF_RNA	REACTOME_METABOLISM_OF_RNA		234	0.185871	0.756785	0.692607	0.992536	1	3388	tags=26%, list=26%, signal=34%
REACTOME_FORMATION_OF_THE_HIV1_EARLY_ELONGATION_COMPLEX	REACTOME_FORMATION_OF_THE_HIV1_EARLY_ELONGATION_COMPLEX		31	0.258782	0.756622	0.736418	0.992011	1	3688	tags=42%, list=28%, signal=58%
ZHENG_FOXP3_TARGETS_UP	ZHENG_FOXP3_TARGETS_UP		20	0.299532	0.756525	0.819127	0.991381	1	690	tags=15%, list=5%, signal=16%
YAO_TEMPORAL_RESPONSE_TO_PROGESTERONE_CLUSTER_2	YAO_TEMPORAL_RESPONSE_TO_PROGESTERONE_CLUSTER_2		67	0.208887	0.756247	0.921415	0.991031	1	665	tags=7%, list=5%, signal=8%
MATZUK_SPERMATID_DIFFERENTIATION	MATZUK_SPERMATID_DIFFERENTIATION		31	0.2133	0.755127	0.83368	0.992165	1	3777	tags=35%, list=29%, signal=50%
REACTOME_RNA_POL_II_TRANSCRIPTION	REACTOME_RNA_POL_II_TRANSCRIPTION		85	0.227601	0.755021	0.748454	0.99153	1	3525	tags=35%, list=27%, signal=48%
PID_MAPK_TRK_PATHWAY	PID_MAPK_TRK_PATHWAY		34	0.241988	0.754887	0.846457	0.990938	1	3481	tags=35%, list=27%, signal=48%
NIKOLSKY_BREAST_CANCER_8Q12_Q22_AMPLICON	NIKOLSKY_BREAST_CANCER_8Q12_Q22_AMPLICON		88	0.281068	0.753587	0.733753	0.992348	1	1693	tags=22%, list=13%, signal=25%
VIETOR_IFRD1_TARGETS	VIETOR_IFRD1_TARGETS		17	0.296367	0.75341	0.804481	0.991826	1	1520	tags=18%, list=12%, signal=20%
LINDGREN_BLADDER_CANCER_WITH_LOH_IN_CHR9Q	LINDGREN_BLADDER_CANCER_WITH_LOH_IN_CHR9Q		87	0.236151	0.753409	0.724806	0.991019	1	1674	tags=16%, list=13%, signal=18%
REACTOME_METABOLISM_OF_MRNA	REACTOME_METABOLISM_OF_MRNA		195	0.176612	0.75292	0.712621	0.991016	1	3117	tags=23%, list=24%, signal=30%
REACTOME_APOPTOTIC_EXECUTION_PHASE	REACTOME_APOPTOTIC_EXECUTION_PHASE		48	0.238192	0.752856	0.827038	0.990325	1	670	tags=10%, list=5%, signal=11%
NAKAMURA_TUMOR_ZONE_PERIPHERAL_VS_CENTRAL_DN	NAKAMURA_TUMOR_ZONE_PERIPHERAL_VS_CENTRAL_DN		444	0.207735	0.752852	0.962963	0.989529	1	1617	tags=16%, list=12%, signal=18%
BIOCARTA_ATRBRCA_PATHWAY	BIOCARTA_ATRBRCA_PATHWAY		20	0.288067	0.752166	0.751969	0.989865	1	2372	tags=30%, list=18%, signal=37%
FEVR_CTNNB1_TARGETS_DN	FEVR_CTNNB1_TARGETS_DN		424	0.230346	0.751927	0.7666	0.98947	1	2403	tags=22%, list=18%, signal=26%
TORCHIA_TARGETS_OF_EWSR1_FLI1_FUSION_UP	TORCHIA_TARGETS_OF_EWSR1_FLI1_FUSION_UP		192	0.190594	0.751896	0.968689	0.988721	1	2999	tags=24%, list=23%, signal=31%
SMID_BREAST_CANCER_RELAPSE_IN_BRAIN_DN	SMID_BREAST_CANCER_RELAPSE_IN_BRAIN_DN		72	0.229576	0.751806	0.932632	0.988065	1	498	tags=10%, list=4%, signal=10%
SCHEIDEREIT_IKK_TARGETS	SCHEIDEREIT_IKK_TARGETS		15	0.270629	0.750313	0.784314	0.989822	1	3246	tags=33%, list=25%, signal=44%
GARCIA_TARGETS_OF_FLI1_AND_DAX1_UP	GARCIA_TARGETS_OF_FLI1_AND_DAX1_UP		34	0.231196	0.749844	0.875	0.989821	1	2569	tags=26%, list=20%, signal=33%
CAFFAREL_RESPONSE_TO_THC_24HR_5_UP	CAFFAREL_RESPONSE_TO_THC_24HR_5_UP		27	0.262048	0.74967	0.762475	0.989319	1	2528	tags=26%, list=19%, signal=32%
EINAV_INTERFERON_SIGNATURE_IN_CANCER	EINAV_INTERFERON_SIGNATURE_IN_CANCER		24	0.361483	0.749255	0.717308	0.98921	1	1924	tags=25%, list=15%, signal=29%
BIOCARTA_NDKDYNAMIN_PATHWAY	BIOCARTA_NDKDYNAMIN_PATHWAY		17	0.240467	0.747801	0.766129	0.990773	1	4883	tags=53%, list=37%, signal=85%
ST_ERK1_ERK2_MAPK_PATHWAY	ST_ERK1_ERK2_MAPK_PATHWAY		30	0.249088	0.74776	0.833992	0.990038	1	1967	tags=23%, list=15%, signal=27%
WANG_SMARCE1_TARGETS_DN	WANG_SMARCE1_TARGETS_DN		315	0.217094	0.747228	0.921105	0.990103	1	2567	tags=26%, list=20%, signal=32%
PID_ATM_PATHWAY	PID_ATM_PATHWAY		30	0.256119	0.74706	0.774648	0.989598	1	1538	tags=17%, list=12%, signal=19%
LEE_AGING_NEOCORTEX_UP	LEE_AGING_NEOCORTEX_UP		79	0.23716	0.746911	0.894942	0.989036	1	3694	tags=44%, list=28%, signal=61%
CARDOSO_RESPONSE_TO_GAMMA_RADIATION_AND_3AB	CARDOSO_RESPONSE_TO_GAMMA_RADIATION_AND_3AB		16	0.275284	0.746681	0.849287	0.988622	1	1726	tags=19%, list=13%, signal=22%
CROONQUIST_IL6_DEPRIVATION_UP	CROONQUIST_IL6_DEPRIVATION_UP		19	0.310064	0.74626	0.82268	0.988528	1	1692	tags=26%, list=13%, signal=30%
REACTOME_INSULIN_RECEPTOR_RECYCLING	REACTOME_INSULIN_RECEPTOR_RECYCLING		19	0.24429	0.745197	0.753398	0.989399	1	2168	tags=26%, list=17%, signal=32%
AMIT_EGF_RESPONSE_60_HELA	AMIT_EGF_RESPONSE_60_HELA		40	0.282283	0.745031	0.812741	0.988872	1	2030	tags=28%, list=16%, signal=32%
BIOCARTA_MET_PATHWAY	BIOCARTA_MET_PATHWAY		36	0.211811	0.744798	0.826087	0.988431	1	1161	tags=11%, list=9%, signal=12%
BIDUS_METASTASIS_UP	BIDUS_METASTASIS_UP		162	0.266041	0.742596	0.742394	0.991189	1	1823	tags=22%, list=14%, signal=25%
XU_GH1_EXOGENOUS_TARGETS_UP	XU_GH1_EXOGENOUS_TARGETS_UP		60	0.190517	0.742197	0.914683	0.991016	1	1107	tags=10%, list=8%, signal=11%
HERNANDEZ_ABERRANT_MITOSIS_BY_DOCETACEL_2NM_DN	HERNANDEZ_ABERRANT_MITOSIS_BY_DOCETACEL_2NM_DN		22	0.296152	0.742121	0.823529	0.990346	1	670	tags=14%, list=5%, signal=14%
FALVELLA_SMOKERS_WITH_LUNG_CANCER	FALVELLA_SMOKERS_WITH_LUNG_CANCER		64	0.228957	0.741965	0.850099	0.989805	1	1248	tags=16%, list=10%, signal=17%
KEGG_AMINOACYL_TRNA_BIOSYNTHESIS	KEGG_AMINOACYL_TRNA_BIOSYNTHESIS		26	0.261632	0.741714	0.693416	0.989426	1	3430	tags=42%, list=26%, signal=57%
ZHU_CMV_8_HR_UP	ZHU_CMV_8_HR_UP		44	0.296539	0.741693	0.772374	0.988677	1	1705	tags=23%, list=13%, signal=26%
PID_P53_REGULATION_PATHWAY	PID_P53_REGULATION_PATHWAY		52	0.222554	0.740396	0.808081	0.989931	1	3968	tags=42%, list=30%, signal=61%
REACTOME_DOUBLE_STRAND_BREAK_REPAIR	REACTOME_DOUBLE_STRAND_BREAK_REPAIR		22	0.261845	0.740056	0.792683	0.989709	1	1707	tags=23%, list=13%, signal=26%
REACTOME_LAGGING_STRAND_SYNTHESIS	REACTOME_LAGGING_STRAND_SYNTHESIS		17	0.372446	0.738996	0.740506	0.990575	1	1995	tags=35%, list=15%, signal=42%
REACTOME_ADP_SIGNALLING_THROUGH_P2RY1	REACTOME_ADP_SIGNALLING_THROUGH_P2RY1		22	0.219874	0.737844	0.847358	0.991508	1	2471	tags=23%, list=19%, signal=28%
DER_IFN_BETA_RESPONSE_UP	DER_IFN_BETA_RESPONSE_UP		96	0.259097	0.737808	0.771203	0.990786	1	2634	tags=31%, list=20%, signal=39%
CHANG_IMMORTALIZED_BY_HPV31_DN	CHANG_IMMORTALIZED_BY_HPV31_DN		61	0.254193	0.737447	0.880077	0.990614	1	879	tags=11%, list=7%, signal=12%
TAVOR_CEBPA_TARGETS_UP	TAVOR_CEBPA_TARGETS_UP		46	0.287942	0.736409	0.853229	0.991462	1	1203	tags=22%, list=9%, signal=24%
PID_LKB1_PATHWAY	PID_LKB1_PATHWAY		32	0.247272	0.735588	0.844961	0.991911	1	1931	tags=22%, list=15%, signal=26%
PID_HIF1A_PATHWAY	PID_HIF1A_PATHWAY		18	0.252827	0.735556	0.805139	0.991171	1	1465	tags=22%, list=11%, signal=25%
BRUINS_UVC_RESPONSE_VIA_TP53_GROUP_C	BRUINS_UVC_RESPONSE_VIA_TP53_GROUP_C		57	0.201482	0.735463	0.897751	0.990546	1	1157	tags=11%, list=9%, signal=12%
GRANDVAUX_IRF3_TARGETS_DN	GRANDVAUX_IRF3_TARGETS_DN		19	0.288465	0.734965	0.862423	0.990545	1	237	tags=11%, list=2%, signal=11%
GARGALOVIC_RESPONSE_TO_OXIDIZED_PHOSPHOLIPIDS_GREEN_UP	GARGALOVIC_RESPONSE_TO_OXIDIZED_PHOSPHOLIPIDS_GREEN_UP		15	0.287824	0.734795	0.856859	0.990011	1	2352	tags=27%, list=18%, signal=33%
HAHTOLA_MYCOSIS_FUNGOIDES_SKIN_DN	HAHTOLA_MYCOSIS_FUNGOIDES_SKIN_DN		27	0.282623	0.734593	0.84114	0.989516	1	3816	tags=44%, list=29%, signal=63%
REACTOME_AMINO_ACID_AND_OLIGOPEPTIDE_SLC_TRANSPORTERS	REACTOME_AMINO_ACID_AND_OLIGOPEPTIDE_SLC_TRANSPORTERS		39	0.256841	0.734412	0.908367	0.98902	1	1382	tags=18%, list=11%, signal=20%
REACTOME_INSULIN_SYNTHESIS_AND_PROCESSING	REACTOME_INSULIN_SYNTHESIS_AND_PROCESSING		17	0.32111	0.732731	0.831301	0.990755	1	3677	tags=47%, list=28%, signal=65%
INGRAM_SHH_TARGETS_DN	INGRAM_SHH_TARGETS_DN		48	0.250506	0.731729	0.936	0.991509	1	1277	tags=17%, list=10%, signal=18%
REACTOME_CELL_CELL_JUNCTION_ORGANIZATION	REACTOME_CELL_CELL_JUNCTION_ORGANIZATION		45	0.245568	0.731454	0.856046	0.991138	1	1847	tags=20%, list=14%, signal=23%
WALLACE_PROSTATE_CANCER_UP	WALLACE_PROSTATE_CANCER_UP		19	0.302315	0.730672	0.849609	0.991524	1	2323	tags=32%, list=18%, signal=38%
HUI_MAPK14_TARGETS_UP	HUI_MAPK14_TARGETS_UP		16	0.293542	0.729619	0.846154	0.992333	1	3384	tags=38%, list=26%, signal=51%
PID_HEDGEHOG_2PATHWAY	PID_HEDGEHOG_2PATHWAY		19	0.244448	0.729035	0.87037	0.992369	1	42	tags=5%, list=0%, signal=5%
RAY_TUMORIGENESIS_BY_ERBB2_CDC25A_UP	RAY_TUMORIGENESIS_BY_ERBB2_CDC25A_UP		83	0.221191	0.727809	0.927022	0.993348	1	3169	tags=29%, list=24%, signal=38%
REACTOME_GROWTH_HORMONE_RECEPTOR_SIGNALING	REACTOME_GROWTH_HORMONE_RECEPTOR_SIGNALING		24	0.245381	0.726912	0.836	0.993843	1	3288	tags=38%, list=25%, signal=50%
DER_IFN_GAMMA_RESPONSE_UP	DER_IFN_GAMMA_RESPONSE_UP		68	0.25955	0.725267	0.778431	0.995475	1	3442	tags=43%, list=26%, signal=58%
GUENTHER_GROWTH_SPHERICAL_VS_ADHERENT_DN	GUENTHER_GROWTH_SPHERICAL_VS_ADHERENT_DN		26	0.28402	0.724527	0.826255	0.995754	1	543	tags=12%, list=4%, signal=12%
REACTOME_PROCESSING_OF_CAPPED_INTRONLESS_PRE_MRNA	REACTOME_PROCESSING_OF_CAPPED_INTRONLESS_PRE_MRNA		18	0.292136	0.723914	0.763374	0.995839	1	2859	tags=28%, list=22%, signal=36%
REACTOME_ACTIVATED_NOTCH1_TRANSMITS_SIGNAL_TO_THE_NUCLEUS	REACTOME_ACTIVATED_NOTCH1_TRANSMITS_SIGNAL_TO_THE_NUCLEUS		19	0.28809	0.722491	0.843985	0.997071	1	1015	tags=16%, list=8%, signal=17%
BIOCARTA_GSK3_PATHWAY	BIOCARTA_GSK3_PATHWAY		26	0.255371	0.721966	0.872211	0.997038	1	2739	tags=27%, list=21%, signal=34%
REACTOME_ERK_MAPK_TARGETS	REACTOME_ERK_MAPK_TARGETS		21	0.263462	0.721738	0.868571	0.996572	1	3506	tags=43%, list=27%, signal=59%
LEE_CALORIE_RESTRICTION_NEOCORTEX_DN	LEE_CALORIE_RESTRICTION_NEOCORTEX_DN		84	0.177789	0.721192	0.938124	0.996578	1	3053	tags=21%, list=23%, signal=28%
REACTOME_ABORTIVE_ELONGATION_OF_HIV1_TRANSCRIPT_IN_THE_ABSENCE_OF_TAT	REACTOME_ABORTIVE_ELONGATION_OF_HIV1_TRANSCRIPT_IN_THE_ABSENCE_OF_TAT		22	0.257593	0.720897	0.763889	0.996227	1	4751	tags=59%, list=36%, signal=93%
DACOSTA_LOW_DOSE_UV_RESPONSE_VIA_ERCC3_XPCS_UP	DACOSTA_LOW_DOSE_UV_RESPONSE_VIA_ERCC3_XPCS_UP		16	0.276148	0.720646	0.896484	0.995799	1	2596	tags=31%, list=20%, signal=39%
REACTOME_SIGNALING_BY_EGFR_IN_CANCER	REACTOME_SIGNALING_BY_EGFR_IN_CANCER		90	0.179955	0.720527	0.934	0.995191	1	2515	tags=21%, list=19%, signal=26%
REN_ALVEOLAR_RHABDOMYOSARCOMA_DN	REN_ALVEOLAR_RHABDOMYOSARCOMA_DN		394	0.228186	0.71916	0.839216	0.996353	1	2490	tags=26%, list=19%, signal=32%
CHIANG_LIVER_CANCER_SUBCLASS_INTERFERON_UP	CHIANG_LIVER_CANCER_SUBCLASS_INTERFERON_UP		25	0.358157	0.718819	0.859922	0.99606	1	1277	tags=24%, list=10%, signal=27%
DARWICHE_PAPILLOMA_PROGRESSION_RISK	DARWICHE_PAPILLOMA_PROGRESSION_RISK		51	0.213179	0.718369	0.95619	0.995913	1	1994	tags=18%, list=15%, signal=21%
SHARMA_PILOCYTIC_ASTROCYTOMA_LOCATION_UP	SHARMA_PILOCYTIC_ASTROCYTOMA_LOCATION_UP		20	0.262828	0.718178	0.882957	0.995392	1	2458	tags=35%, list=19%, signal=43%
REACTOME_THE_ROLE_OF_NEF_IN_HIV1_REPLICATION_AND_DISEASE_PATHOGENESIS	REACTOME_THE_ROLE_OF_NEF_IN_HIV1_REPLICATION_AND_DISEASE_PATHOGENESIS		25	0.259341	0.718092	0.828516	0.994756	1	2756	tags=36%, list=21%, signal=46%
BOSCO_INTERFERON_INDUCED_ANTIVIRAL_MODULE	BOSCO_INTERFERON_INDUCED_ANTIVIRAL_MODULE		56	0.293162	0.717917	0.799607	0.994231	1	2494	tags=30%, list=19%, signal=37%
THUM_SYSTOLIC_HEART_FAILURE_UP	THUM_SYSTOLIC_HEART_FAILURE_UP		345	0.226997	0.717566	0.866279	0.993941	1	2082	tags=21%, list=16%, signal=25%
REACTOME_PI_METABOLISM	REACTOME_PI_METABOLISM		35	0.191967	0.716532	0.860236	0.994564	1	1913	tags=20%, list=15%, signal=23%
REACTOME_NUCLEOTIDE_BINDING_DOMAIN_LEUCINE_RICH_REPEAT_CONTAINING_RECEPTOR_NLR_SIGNALING_PATHWAYS	REACTOME_NUCLEOTIDE_BINDING_DOMAIN_LEUCINE_RICH_REPEAT_CONTAINING_RECEPTOR_NLR_SIGNALING_PATHWAYS		39	0.239124	0.715256	0.90411	0.995494	1	1521	tags=18%, list=12%, signal=20%
MYLLYKANGAS_AMPLIFICATION_HOT_SPOT_23	MYLLYKANGAS_AMPLIFICATION_HOT_SPOT_23		18	0.279152	0.713685	0.856299	0.996803	1	1718	tags=22%, list=13%, signal=26%
KEGG_BASAL_TRANSCRIPTION_FACTORS	KEGG_BASAL_TRANSCRIPTION_FACTORS		32	0.238023	0.713167	0.825103	0.996713	1	3248	tags=44%, list=25%, signal=58%
REACTOME_INSULIN_RECEPTOR_SIGNALLING_CASCADE	REACTOME_INSULIN_RECEPTOR_SIGNALLING_CASCADE		71	0.188465	0.710947	0.918	0.998863	1	2386	tags=21%, list=18%, signal=26%
ZHAN_MULTIPLE_MYELOMA_HP_UP	ZHAN_MULTIPLE_MYELOMA_HP_UP		38	0.244068	0.710501	0.845529	0.998664	1	1672	tags=13%, list=13%, signal=15%
JOHNSTONE_PARVB_TARGETS_2_UP	JOHNSTONE_PARVB_TARGETS_2_UP		121	0.23346	0.710483	0.928309	0.997924	1	2284	tags=26%, list=18%, signal=31%
KRIEG_HYPOXIA_VIA_KDM3A	KRIEG_HYPOXIA_VIA_KDM3A		43	0.279812	0.709213	0.897796	0.998846	1	1101	tags=16%, list=8%, signal=18%
JI_RESPONSE_TO_FSH_UP	JI_RESPONSE_TO_FSH_UP		68	0.239168	0.708955	0.937736	0.998401	1	2110	tags=25%, list=16%, signal=30%
REACTOME_TRAF6_MEDIATED_NFKB_ACTIVATION	REACTOME_TRAF6_MEDIATED_NFKB_ACTIVATION		19	0.250802	0.708448	0.843943	0.998299	1	3346	tags=37%, list=26%, signal=49%
SCIAN_INVERSED_TARGETS_OF_TP53_AND_TP73_DN	SCIAN_INVERSED_TARGETS_OF_TP53_AND_TP73_DN		26	0.243286	0.708115	0.852459	0.997998	1	2085	tags=23%, list=16%, signal=27%
YU_BAP1_TARGETS	YU_BAP1_TARGETS		24	0.294067	0.707851	0.855769	0.997566	1	1300	tags=21%, list=10%, signal=23%
PID_FANCONI_PATHWAY	PID_FANCONI_PATHWAY		39	0.262789	0.706727	0.789264	0.998297	1	2817	tags=33%, list=22%, signal=42%
YAO_TEMPORAL_RESPONSE_TO_PROGESTERONE_CLUSTER_6	YAO_TEMPORAL_RESPONSE_TO_PROGESTERONE_CLUSTER_6		58	0.243911	0.706695	0.959677	0.997572	1	1975	tags=22%, list=15%, signal=26%
KIM_PTEN_TARGETS_UP	KIM_PTEN_TARGETS_UP		17	0.301222	0.706387	0.860606	0.997173	1	3334	tags=41%, list=26%, signal=55%
HU_ANGIOGENESIS_UP	HU_ANGIOGENESIS_UP		20	0.281952	0.706204	0.878728	0.996667	1	286	tags=10%, list=2%, signal=10%
BIOCARTA_P53HYPOXIA_PATHWAY	BIOCARTA_P53HYPOXIA_PATHWAY		22	0.258264	0.706016	0.887574	0.996139	1	3629	tags=50%, list=28%, signal=69%
DE_YY1_TARGETS_UP	DE_YY1_TARGETS_UP		18	0.241621	0.704952	0.864301	0.99667	1	2361	tags=28%, list=18%, signal=34%
HECKER_IFNB1_TARGETS	HECKER_IFNB1_TARGETS		75	0.303244	0.704949	0.808967	0.995914	1	1626	tags=23%, list=12%, signal=26%
YORDY_RECIPROCAL_REGULATION_BY_ETS1_AND_SP100_UP	YORDY_RECIPROCAL_REGULATION_BY_ETS1_AND_SP100_UP		21	0.235759	0.704171	0.877359	0.99612	1	3520	tags=33%, list=27%, signal=46%
GRABARCZYK_BCL11B_TARGETS_UP	GRABARCZYK_BCL11B_TARGETS_UP		52	0.22962	0.703657	0.926733	0.995999	1	3981	tags=48%, list=31%, signal=69%
FOSTER_KDM1A_TARGETS_UP	FOSTER_KDM1A_TARGETS_UP		179	0.212688	0.703316	0.983773	0.995634	1	1979	tags=17%, list=15%, signal=20%
PICCALUGA_ANGIOIMMUNOBLASTIC_LYMPHOMA_DN	PICCALUGA_ANGIOIMMUNOBLASTIC_LYMPHOMA_DN		101	0.213105	0.702828	0.917864	0.99547	1	1834	tags=19%, list=14%, signal=22%
HSIAO_HOUSEKEEPING_GENES	HSIAO_HOUSEKEEPING_GENES		368	0.159015	0.702329	0.841176	0.995304	1	3124	tags=25%, list=24%, signal=32%
CERIBELLI_PROMOTERS_INACTIVE_AND_BOUND_BY_NFY	CERIBELLI_PROMOTERS_INACTIVE_AND_BOUND_BY_NFY		22	0.244604	0.702285	0.912871	0.994605	1	1479	tags=18%, list=11%, signal=20%
ADDYA_ERYTHROID_DIFFERENTIATION_BY_HEMIN	ADDYA_ERYTHROID_DIFFERENTIATION_BY_HEMIN		70	0.233514	0.700098	0.935547	0.996531	1	2380	tags=27%, list=18%, signal=33%
WILCOX_RESPONSE_TO_PROGESTERONE_UP	WILCOX_RESPONSE_TO_PROGESTERONE_UP		135	0.241751	0.699997	0.882917	0.995896	1	1986	tags=21%, list=15%, signal=24%
REACTOME_MRNA_CAPPING	REACTOME_MRNA_CAPPING		27	0.23713	0.699833	0.780041	0.995351	1	2053	tags=22%, list=16%, signal=26%
REACTOME_EXTENSION_OF_TELOMERES	REACTOME_EXTENSION_OF_TELOMERES		23	0.319725	0.69931	0.762745	0.995238	1	1995	tags=30%, list=15%, signal=36%
GRADE_COLON_AND_RECTAL_CANCER_UP	GRADE_COLON_AND_RECTAL_CANCER_UP		223	0.209801	0.697633	0.876984	0.996494	1	3045	tags=30%, list=23%, signal=39%
AKL_HTLV1_INFECTION_DN	AKL_HTLV1_INFECTION_DN		59	0.241152	0.6974	0.8861	0.996029	1	2100	tags=27%, list=16%, signal=32%
NUTT_GBM_VS_AO_GLIOMA_UP	NUTT_GBM_VS_AO_GLIOMA_UP		45	0.245121	0.697279	0.831144	0.995421	1	2699	tags=33%, list=21%, signal=42%
REACTOME_SHC1_EVENTS_IN_ERBB4_SIGNALING	REACTOME_SHC1_EVENTS_IN_ERBB4_SIGNALING		18	0.254125	0.696985	0.857715	0.99502	1	1161	tags=17%, list=9%, signal=18%
MCCABE_HOXC6_TARGETS_CANCER_DN	MCCABE_HOXC6_TARGETS_CANCER_DN		15	0.264	0.696297	0.869823	0.995043	1	2122	tags=27%, list=16%, signal=32%
GUO_HEX_TARGETS_DN	GUO_HEX_TARGETS_DN		50	0.223675	0.695679	0.898204	0.99504	1	2808	tags=30%, list=22%, signal=38%
MAGRANGEAS_MULTIPLE_MYELOMA_IGG_VS_IGA_DN	MAGRANGEAS_MULTIPLE_MYELOMA_IGG_VS_IGA_DN		24	0.229892	0.695587	0.8861	0.994415	1	270	tags=8%, list=2%, signal=8%
ZHU_CMV_8_HR_DN	ZHU_CMV_8_HR_DN		49	0.220837	0.695232	0.936605	0.994102	1	2671	tags=31%, list=20%, signal=38%
SANA_TNF_SIGNALING_UP	SANA_TNF_SIGNALING_UP		74	0.284347	0.69516	0.865784	0.993444	1	2130	tags=28%, list=16%, signal=34%
PLASARI_TGFB1_SIGNALING_VIA_NFIC_1HR_UP	PLASARI_TGFB1_SIGNALING_VIA_NFIC_1HR_UP		28	0.261774	0.695038	0.923977	0.992827	1	1384	tags=18%, list=11%, signal=20%
PID_TGFBR_PATHWAY	PID_TGFBR_PATHWAY		50	0.21758	0.694879	0.900585	0.992267	1	2526	tags=22%, list=19%, signal=27%
AKL_HTLV1_INFECTION_UP	AKL_HTLV1_INFECTION_UP		26	0.269013	0.693375	0.908163	0.993237	1	1012	tags=15%, list=8%, signal=17%
LINDGREN_BLADDER_CANCER_CLUSTER_2A_DN	LINDGREN_BLADDER_CANCER_CLUSTER_2A_DN		110	0.219512	0.693095	0.937743	0.992811	1	2419	tags=26%, list=19%, signal=32%
TSENG_ADIPOGENIC_POTENTIAL_DN	TSENG_ADIPOGENIC_POTENTIAL_DN		40	0.24735	0.69291	0.923228	0.992275	1	3280	tags=38%, list=25%, signal=50%
SANA_RESPONSE_TO_IFNG_UP	SANA_RESPONSE_TO_IFNG_UP		54	0.311702	0.692643	0.806576	0.991857	1	2131	tags=28%, list=16%, signal=33%
BECKER_TAMOXIFEN_RESISTANCE_UP	BECKER_TAMOXIFEN_RESISTANCE_UP		49	0.249706	0.692613	0.935484	0.991147	1	3472	tags=37%, list=27%, signal=50%
REACTOME_GAB1_SIGNALOSOME	REACTOME_GAB1_SIGNALOSOME		26	0.228085	0.692183	0.894531	0.990887	1	2515	tags=27%, list=19%, signal=33%
REACTOME_MITOTIC_G1_G1_S_PHASES	REACTOME_MITOTIC_G1_G1_S_PHASES		115	0.227626	0.692107	0.790323	0.990234	1	3316	tags=36%, list=25%, signal=47%
LIU_NASOPHARYNGEAL_CARCINOMA	LIU_NASOPHARYNGEAL_CARCINOMA		62	0.187785	0.689454	0.947475	0.992515	1	2977	tags=26%, list=23%, signal=33%
MATZUK_MEIOTIC_AND_DNA_REPAIR	MATZUK_MEIOTIC_AND_DNA_REPAIR		33	0.201153	0.6893	0.884921	0.991934	1	1106	tags=9%, list=8%, signal=10%
PID_WNT_NONCANONICAL_PATHWAY	PID_WNT_NONCANONICAL_PATHWAY		28	0.228506	0.689142	0.911417	0.991362	1	3047	tags=36%, list=23%, signal=47%
HAHTOLA_SEZARY_SYNDROM_UP	HAHTOLA_SEZARY_SYNDROM_UP		91	0.225601	0.689012	0.974757	0.990782	1	2330	tags=24%, list=18%, signal=29%
CHIANG_LIVER_CANCER_SUBCLASS_INTERFERON_DN	CHIANG_LIVER_CANCER_SUBCLASS_INTERFERON_DN		33	0.3187	0.685951	0.871579	0.993483	1	2552	tags=30%, list=20%, signal=38%
KLEIN_PRIMARY_EFFUSION_LYMPHOMA_UP	KLEIN_PRIMARY_EFFUSION_LYMPHOMA_UP		51	0.200115	0.685218	0.959538	0.993573	1	2458	tags=22%, list=19%, signal=26%
PID_HNF3A_PATHWAY	PID_HNF3A_PATHWAY		39	0.19836	0.684655	0.904762	0.99343	1	3972	tags=36%, list=30%, signal=51%
HOLLMANN_APOPTOSIS_VIA_CD40_DN	HOLLMANN_APOPTOSIS_VIA_CD40_DN		238	0.198535	0.684454	0.968689	0.99292	1	1766	tags=18%, list=14%, signal=21%
REACTOME_REGULATION_OF_INSULIN_SECRETION	REACTOME_REGULATION_OF_INSULIN_SECRETION		80	0.188075	0.682622	0.963265	0.994219	1	2618	tags=21%, list=20%, signal=26%
WOOD_EBV_EBNA1_TARGETS_UP	WOOD_EBV_EBNA1_TARGETS_UP		105	0.217259	0.682177	0.969112	0.993998	1	3297	tags=33%, list=25%, signal=44%
KEGG_TYPE_II_DIABETES_MELLITUS	KEGG_TYPE_II_DIABETES_MELLITUS		43	0.20097	0.682169	0.916667	0.99327	1	947	tags=9%, list=7%, signal=10%
LABBE_WNT3A_TARGETS_UP	LABBE_WNT3A_TARGETS_UP		107	0.228881	0.681998	0.986381	0.99271	1	1074	tags=13%, list=8%, signal=14%
WHITFIELD_CELL_CYCLE_S	WHITFIELD_CELL_CYCLE_S		108	0.218486	0.679675	0.891732	0.994407	1	1995	tags=20%, list=15%, signal=24%
BIOCARTA_MAPK_PATHWAY	BIOCARTA_MAPK_PATHWAY		86	0.172941	0.678266	0.969754	0.995116	1	2739	tags=22%, list=21%, signal=28%
VALK_AML_CLUSTER_7	VALK_AML_CLUSTER_7		28	0.215689	0.678236	0.927856	0.994415	1	2045	tags=18%, list=16%, signal=21%
BIOCARTA_HIF_PATHWAY	BIOCARTA_HIF_PATHWAY		15	0.249504	0.678065	0.831984	0.993863	1	2094	tags=20%, list=16%, signal=24%
HOFMANN_CELL_LYMPHOMA_DN	HOFMANN_CELL_LYMPHOMA_DN		39	0.198412	0.677286	0.940206	0.993962	1	3838	tags=33%, list=29%, signal=47%
YAO_TEMPORAL_RESPONSE_TO_PROGESTERONE_CLUSTER_9	YAO_TEMPORAL_RESPONSE_TO_PROGESTERONE_CLUSTER_9		62	0.23452	0.676825	0.9501	0.9937	1	921	tags=15%, list=7%, signal=16%
COLDREN_GEFITINIB_RESISTANCE_DN	COLDREN_GEFITINIB_RESISTANCE_DN		145	0.235148	0.673492	0.915074	0.996228	1	1685	tags=15%, list=13%, signal=17%
WAMUNYOKOLI_OVARIAN_CANCER_LMP_UP	WAMUNYOKOLI_OVARIAN_CANCER_LMP_UP		185	0.197137	0.673344	0.961315	0.995642	1	2079	tags=18%, list=16%, signal=21%
REACTOME_RORA_ACTIVATES_CIRCADIAN_EXPRESSION	REACTOME_RORA_ACTIVATES_CIRCADIAN_EXPRESSION		21	0.258286	0.672641	0.902344	0.995632	1	1429	tags=24%, list=11%, signal=27%
SA_G1_AND_S_PHASES	SA_G1_AND_S_PHASES		15	0.26622	0.671915	0.879921	0.995622	1	3629	tags=47%, list=28%, signal=65%
PENG_GLUTAMINE_DEPRIVATION_UP	PENG_GLUTAMINE_DEPRIVATION_UP		36	0.217364	0.668512	0.943025	0.998157	1	3691	tags=42%, list=28%, signal=58%
GARGALOVIC_RESPONSE_TO_OXIDIZED_PHOSPHOLIPIDS_BLACK_UP	GARGALOVIC_RESPONSE_TO_OXIDIZED_PHOSPHOLIPIDS_BLACK_UP		26	0.235291	0.668471	0.944785	0.997463	1	1971	tags=19%, list=15%, signal=23%
FERRANDO_LYL1_NEIGHBORS	FERRANDO_LYL1_NEIGHBORS		15	0.288044	0.667468	0.895437	0.997702	1	1641	tags=27%, list=13%, signal=30%
BIOCARTA_WNT_PATHWAY	BIOCARTA_WNT_PATHWAY		25	0.241119	0.666596	0.90535	0.997816	1	1769	tags=20%, list=14%, signal=23%
HALMOS_CEBPA_TARGETS_DN	HALMOS_CEBPA_TARGETS_DN		44	0.227835	0.664543	0.957404	0.998972	1	2694	tags=25%, list=21%, signal=31%
PAL_PRMT5_TARGETS_DN	PAL_PRMT5_TARGETS_DN		26	0.242343	0.664413	0.97541	0.998347	1	1471	tags=19%, list=11%, signal=22%
VALK_AML_CLUSTER_11	VALK_AML_CLUSTER_11		35	0.248384	0.66395	0.908222	0.998045	1	1542	tags=17%, list=12%, signal=19%
RAMALHO_STEMNESS_DN	RAMALHO_STEMNESS_DN		61	0.220731	0.663402	0.933333	0.997847	1	2070	tags=20%, list=16%, signal=23%
RAMPON_ENRICHED_LEARNING_ENVIRONMENT_LATE_UP	RAMPON_ENRICHED_LEARNING_ENVIRONMENT_LATE_UP		21	0.217274	0.662473	0.913215	0.997962	1	3855	tags=38%, list=30%, signal=54%
TCGA_GLIOBLASTOMA_COPY_NUMBER_DN	TCGA_GLIOBLASTOMA_COPY_NUMBER_DN		23	0.234158	0.662366	0.902534	0.997338	1	1770	tags=17%, list=14%, signal=20%
PAPASPYRIDONOS_UNSTABLE_ATEROSCLEROTIC_PLAQUE_UP	PAPASPYRIDONOS_UNSTABLE_ATEROSCLEROTIC_PLAQUE_UP		44	0.266494	0.661508	0.898608	0.997354	1	2046	tags=27%, list=16%, signal=32%
AIGNER_ZEB1_TARGETS	AIGNER_ZEB1_TARGETS		25	0.312557	0.660206	0.859213	0.997814	1	1066	tags=16%, list=8%, signal=17%
ZHENG_FOXP3_TARGETS_IN_T_LYMPHOCYTE_DN	ZHENG_FOXP3_TARGETS_IN_T_LYMPHOCYTE_DN		31	0.230666	0.66001	0.927126	0.997281	1	869	tags=10%, list=7%, signal=10%
STAMBOLSKY_TARGETS_OF_MUTATED_TP53_DN	STAMBOLSKY_TARGETS_OF_MUTATED_TP53_DN		35	0.277079	0.659096	0.900952	0.997372	1	1151	tags=17%, list=9%, signal=19%
ST_WNT_BETA_CATENIN_PATHWAY	ST_WNT_BETA_CATENIN_PATHWAY		30	0.212958	0.6584	0.956612	0.997259	1	2074	tags=23%, list=16%, signal=28%
LEE_METASTASIS_AND_ALTERNATIVE_SPLICING_DN	LEE_METASTASIS_AND_ALTERNATIVE_SPLICING_DN		38	0.214439	0.657199	0.973361	0.997595	1	2147	tags=24%, list=16%, signal=28%
AMIT_SERUM_RESPONSE_40_MCF10A	AMIT_SERUM_RESPONSE_40_MCF10A		28	0.302293	0.656239	0.894949	0.99774	1	2085	tags=25%, list=16%, signal=30%
HU_GENOTOXIC_DAMAGE_24HR	HU_GENOTOXIC_DAMAGE_24HR		32	0.247059	0.655659	0.913044	0.997505	1	1820	tags=16%, list=14%, signal=18%
RORIE_TARGETS_OF_EWSR1_FLI1_FUSION_UP	RORIE_TARGETS_OF_EWSR1_FLI1_FUSION_UP		29	0.262879	0.654492	0.946257	0.997765	1	282	tags=10%, list=2%, signal=11%
TARTE_PLASMA_CELL_VS_PLASMABLAST_DN	TARTE_PLASMA_CELL_VS_PLASMABLAST_DN		285	0.210232	0.652998	0.883768	0.998329	1	2198	tags=21%, list=17%, signal=25%
BROWNE_HCMV_INFECTION_2HR_DN	BROWNE_HCMV_INFECTION_2HR_DN		46	0.221419	0.651629	0.96124	0.998741	1	1297	tags=13%, list=10%, signal=14%
HOFMANN_MYELODYSPLASTIC_SYNDROM_LOW_RISK_DN	HOFMANN_MYELODYSPLASTIC_SYNDROM_LOW_RISK_DN		28	0.271096	0.651348	0.93346	0.998254	1	3588	tags=54%, list=28%, signal=74%
BIOCARTA_IL22BP_PATHWAY	BIOCARTA_IL22BP_PATHWAY		15	0.251297	0.649588	0.878327	0.999008	1	2396	tags=33%, list=18%, signal=41%
OZEN_MIR125B1_TARGETS	OZEN_MIR125B1_TARGETS		15	0.247852	0.648844	0.916996	0.998909	1	2551	tags=27%, list=20%, signal=33%
REACTOME_CELL_JUNCTION_ORGANIZATION	REACTOME_CELL_JUNCTION_ORGANIZATION		62	0.201336	0.647558	0.968566	0.999309	1	1847	tags=18%, list=14%, signal=21%
KEGG_THYROID_CANCER	KEGG_THYROID_CANCER		29	0.233172	0.647355	0.950719	0.998756	1	3246	tags=34%, list=25%, signal=46%
DER_IFN_ALPHA_RESPONSE_UP	DER_IFN_ALPHA_RESPONSE_UP		71	0.252401	0.646608	0.879921	0.998647	1	3525	tags=42%, list=27%, signal=58%
CHOI_ATL_STAGE_PREDICTOR	CHOI_ATL_STAGE_PREDICTOR		40	0.205445	0.646277	0.903733	0.998187	1	3072	tags=30%, list=24%, signal=39%
PID_AURORA_A_PATHWAY	PID_AURORA_A_PATHWAY		29	0.226846	0.64602	0.906667	0.997674	1	3972	tags=41%, list=30%, signal=59%
ZIRN_TRETINOIN_RESPONSE_WT1_UP	ZIRN_TRETINOIN_RESPONSE_WT1_UP		18	0.267503	0.645362	0.94332	0.997486	1	1138	tags=17%, list=9%, signal=18%
VANHARANTA_UTERINE_FIBROID_DN	VANHARANTA_UTERINE_FIBROID_DN		61	0.233818	0.645232	0.970954	0.996859	1	2542	tags=26%, list=20%, signal=32%
REACTOME_CLEAVAGE_OF_GROWING_TRANSCRIPT_IN_THE_TERMINATION_REGION_	REACTOME_CLEAVAGE_OF_GROWING_TRANSCRIPT_IN_THE_TERMINATION_REGION_		28	0.235438	0.645206	0.854123	0.996165	1	2909	tags=29%, list=22%, signal=37%
OKAMOTO_LIVER_CANCER_MULTICENTRIC_OCCURRENCE_UP	OKAMOTO_LIVER_CANCER_MULTICENTRIC_OCCURRENCE_UP		23	0.256094	0.644776	0.938697	0.99579	1	2311	tags=30%, list=18%, signal=37%
MODY_HIPPOCAMPUS_PRENATAL	MODY_HIPPOCAMPUS_PRENATAL		36	0.204964	0.644477	0.915663	0.995294	1	1495	tags=14%, list=11%, signal=16%
WANG_NEOPLASTIC_TRANSFORMATION_BY_CCND1_MYC	WANG_NEOPLASTIC_TRANSFORMATION_BY_CCND1_MYC		18	0.280574	0.643355	0.94958	0.995413	1	2314	tags=39%, list=18%, signal=47%
ZHANG_PROLIFERATING_VS_QUIESCENT	ZHANG_PROLIFERATING_VS_QUIESCENT		50	0.203922	0.642909	0.97076	0.99506	1	2739	tags=26%, list=21%, signal=33%
WEST_ADRENOCORTICAL_TUMOR_MARKERS_DN	WEST_ADRENOCORTICAL_TUMOR_MARKERS_DN		19	0.278307	0.642376	0.931774	0.994771	1	1384	tags=21%, list=11%, signal=24%
WANG_BARRETTS_ESOPHAGUS_AND_ESOPHAGUS_CANCER_DN	WANG_BARRETTS_ESOPHAGUS_AND_ESOPHAGUS_CANCER_DN		37	0.22953	0.641368	0.953441	0.994861	1	2381	tags=19%, list=18%, signal=23%
AUNG_GASTRIC_CANCER	AUNG_GASTRIC_CANCER		42	0.201397	0.64011	0.979339	0.99514	1	3724	tags=40%, list=29%, signal=56%
MUELLER_PLURINET	MUELLER_PLURINET		253	0.201304	0.639167	0.896484	0.995148	1	2450	tags=19%, list=19%, signal=22%
BIOCARTA_SPPA_PATHWAY	BIOCARTA_SPPA_PATHWAY		19	0.212668	0.638998	0.942639	0.994562	1	3170	tags=37%, list=24%, signal=49%
MORI_PRE_BI_LYMPHOCYTE_DN	MORI_PRE_BI_LYMPHOCYTE_DN		57	0.219323	0.637044	0.917808	0.995273	1	2468	tags=28%, list=19%, signal=34%
REACTOME_METABOLISM_OF_NON_CODING_RNA	REACTOME_METABOLISM_OF_NON_CODING_RNA		42	0.230859	0.635994	0.832323	0.995316	1	3688	tags=31%, list=28%, signal=43%
DANG_MYC_TARGETS_UP	DANG_MYC_TARGETS_UP		122	0.187587	0.634693	0.915187	0.995554	1	2387	tags=20%, list=18%, signal=24%
ZHANG_RESPONSE_TO_CANTHARIDIN_UP	ZHANG_RESPONSE_TO_CANTHARIDIN_UP		17	0.232101	0.633802	0.946939	0.995504	1	3488	tags=35%, list=27%, signal=48%
NIKOLSKY_BREAST_CANCER_16P13_AMPLICON	NIKOLSKY_BREAST_CANCER_16P13_AMPLICON		72	0.206745	0.633601	0.823651	0.994962	1	1715	tags=13%, list=13%, signal=14%
KORKOLA_YOLK_SAC_TUMOR	KORKOLA_YOLK_SAC_TUMOR		48	0.215742	0.633465	0.992701	0.994354	1	1976	tags=21%, list=15%, signal=24%
ZHAN_VARIABLE_EARLY_DIFFERENTIATION_GENES_DN	ZHAN_VARIABLE_EARLY_DIFFERENTIATION_GENES_DN		30	0.211281	0.631647	0.889109	0.99493	1	2406	tags=20%, list=18%, signal=24%
PID_A6B1_A6B4_INTEGRIN_PATHWAY	PID_A6B1_A6B4_INTEGRIN_PATHWAY		45	0.208058	0.629671	0.974757	0.995553	1	2458	tags=24%, list=19%, signal=30%
PODAR_RESPONSE_TO_ADAPHOSTIN_DN	PODAR_RESPONSE_TO_ADAPHOSTIN_DN		16	0.286236	0.629457	0.93666	0.994988	1	573	tags=13%, list=4%, signal=13%
WEST_ADRENOCORTICAL_CARCINOMA_VS_ADENOMA_UP	WEST_ADRENOCORTICAL_CARCINOMA_VS_ADENOMA_UP		15	0.226823	0.627432	0.91411	0.995644	1	2477	tags=20%, list=19%, signal=25%
MANALO_HYPOXIA_DN	MANALO_HYPOXIA_DN		258	0.223122	0.626329	0.885149	0.99568	1	2216	tags=21%, list=17%, signal=25%
PID_ATF2_PATHWAY	PID_ATF2_PATHWAY		54	0.198413	0.6251	0.981366	0.995763	1	1521	tags=17%, list=12%, signal=19%
REACTOME_G_PROTEIN_ACTIVATION	REACTOME_G_PROTEIN_ACTIVATION		24	0.178896	0.624957	0.948454	0.995152	1	2643	tags=21%, list=20%, signal=26%
BIOCARTA_G2_PATHWAY	BIOCARTA_G2_PATHWAY		23	0.232088	0.620977	0.921722	0.996993	1	3629	tags=35%, list=28%, signal=48%
MARZEC_IL2_SIGNALING_DN	MARZEC_IL2_SIGNALING_DN		27	0.227085	0.62065	0.960825	0.996486	1	2648	tags=30%, list=20%, signal=37%
KEGG_ETHER_LIPID_METABOLISM	KEGG_ETHER_LIPID_METABOLISM		25	0.214105	0.620435	0.980119	0.995934	1	1833	tags=20%, list=14%, signal=23%
HOSHIDA_LIVER_CANCER_SUBCLASS_S2	HOSHIDA_LIVER_CANCER_SUBCLASS_S2		108	0.234582	0.619974	0.846307	0.995517	1	3635	tags=36%, list=28%, signal=50%
BOYAULT_LIVER_CANCER_SUBCLASS_G6_DN	BOYAULT_LIVER_CANCER_SUBCLASS_G6_DN		19	0.268941	0.619543	0.930612	0.995104	1	2292	tags=26%, list=18%, signal=32%
BROWNE_INTERFERON_RESPONSIVE_GENES	BROWNE_INTERFERON_RESPONSIVE_GENES		64	0.28197	0.618736	0.894531	0.994921	1	3844	tags=42%, list=29%, signal=60%
NGUYEN_NOTCH1_TARGETS_UP	NGUYEN_NOTCH1_TARGETS_UP		28	0.208254	0.618534	0.979554	0.994355	1	4022	tags=39%, list=31%, signal=57%
CHUNG_BLISTER_CYTOTOXICITY_DN	CHUNG_BLISTER_CYTOTOXICITY_DN		30	0.215687	0.618211	0.972868	0.99387	1	1950	tags=17%, list=15%, signal=20%
LIU_SMARCA4_TARGETS	LIU_SMARCA4_TARGETS		48	0.249745	0.617549	0.951644	0.993572	1	1395	tags=17%, list=11%, signal=19%
BROWNE_HCMV_INFECTION_2HR_UP	BROWNE_HCMV_INFECTION_2HR_UP		34	0.25047	0.617388	0.958333	0.992956	1	2259	tags=26%, list=17%, signal=32%
LOPEZ_MBD_TARGETS_IMPRINTED_AND_X_LINKED	LOPEZ_MBD_TARGETS_IMPRINTED_AND_X_LINKED		16	0.240291	0.615849	0.93319	0.993203	1	1149	tags=13%, list=9%, signal=14%
SATO_SILENCED_EPIGENETICALLY_IN_PANCREATIC_CANCER	SATO_SILENCED_EPIGENETICALLY_IN_PANCREATIC_CANCER		43	0.209452	0.614644	0.992141	0.993192	1	2179	tags=19%, list=17%, signal=22%
KYNG_ENVIRONMENTAL_STRESS_RESPONSE_DN	KYNG_ENVIRONMENTAL_STRESS_RESPONSE_DN		15	0.220558	0.613826	0.93279	0.992992	1	3980	tags=40%, list=31%, signal=58%
REACTOME_LATE_PHASE_OF_HIV_LIFE_CYCLE	REACTOME_LATE_PHASE_OF_HIV_LIFE_CYCLE		96	0.183674	0.613752	0.90101	0.992334	1	3525	tags=32%, list=27%, signal=44%
PID_AR_NONGENOMIC_PATHWAY	PID_AR_NONGENOMIC_PATHWAY		30	0.184865	0.611585	0.978516	0.99291	1	3170	tags=30%, list=24%, signal=40%
KASLER_HDAC7_TARGETS_2_DN	KASLER_HDAC7_TARGETS_2_DN		25	0.206663	0.609832	0.956693	0.993172	1	4049	tags=36%, list=31%, signal=52%
REACTOME_KINESINS	REACTOME_KINESINS		17	0.31098	0.608606	0.876228	0.993189	1	413	tags=12%, list=3%, signal=12%
KEGG_HEDGEHOG_SIGNALING_PATHWAY	KEGG_HEDGEHOG_SIGNALING_PATHWAY		45	0.163838	0.607724	0.972917	0.993009	1	1726	tags=11%, list=13%, signal=13%
REACTOME_INTERFERON_SIGNALING	REACTOME_INTERFERON_SIGNALING		141	0.183955	0.607432	0.94165	0.992466	1	2566	tags=20%, list=20%, signal=24%
REACTOME_TGF_BETA_RECEPTOR_SIGNALING_ACTIVATES_SMADS	REACTOME_TGF_BETA_RECEPTOR_SIGNALING_ACTIVATES_SMADS		23	0.189881	0.605059	0.923232	0.993101	1	1950	tags=17%, list=15%, signal=20%
PID_HIF2PATHWAY	PID_HIF2PATHWAY		32	0.189546	0.603882	0.959831	0.993034	1	1392	tags=13%, list=11%, signal=14%
PID_TELOMERASE_PATHWAY	PID_TELOMERASE_PATHWAY		62	0.161493	0.60314	0.988142	0.992715	1	3319	tags=27%, list=25%, signal=37%
KANG_FLUOROURACIL_RESISTANCE_DN	KANG_FLUOROURACIL_RESISTANCE_DN		16	0.257726	0.602912	0.950884	0.992156	1	3075	tags=31%, list=24%, signal=41%
REACTOME_CIRCADIAN_REPRESSION_OF_EXPRESSION_BY_REV_ERBA	REACTOME_CIRCADIAN_REPRESSION_OF_EXPRESSION_BY_REV_ERBA		19	0.229046	0.602238	0.955285	0.991814	1	2132	tags=26%, list=16%, signal=31%
ST_B_CELL_ANTIGEN_RECEPTOR	ST_B_CELL_ANTIGEN_RECEPTOR		39	0.188247	0.601372	0.97053	0.991592	1	3030	tags=28%, list=23%, signal=37%
REACTOME_MITOTIC_M_M_G1_PHASES	REACTOME_MITOTIC_M_M_G1_PHASES		141	0.217969	0.600611	0.843373	0.991301	1	3206	tags=32%, list=25%, signal=42%
HOWLIN_CITED1_TARGETS_1_UP	HOWLIN_CITED1_TARGETS_1_UP		27	0.23771	0.600193	0.992063	0.990819	1	2675	tags=30%, list=21%, signal=37%
AMUNDSON_GAMMA_RADIATION_RESISTANCE	AMUNDSON_GAMMA_RADIATION_RESISTANCE		15	0.231682	0.598197	0.960396	0.991183	1	2591	tags=33%, list=20%, signal=42%
BOYLAN_MULTIPLE_MYELOMA_D_CLUSTER_UP	BOYLAN_MULTIPLE_MYELOMA_D_CLUSTER_UP		23	0.212749	0.597886	0.991853	0.990653	1	4094	tags=43%, list=31%, signal=63%
REACTOME_LOSS_OF_NLP_FROM_MITOTIC_CENTROSOMES	REACTOME_LOSS_OF_NLP_FROM_MITOTIC_CENTROSOMES		45	0.172867	0.596085	0.9501	0.990907	1	3719	tags=36%, list=29%, signal=50%
FOURNIER_ACINAR_DEVELOPMENT_LATE_2	FOURNIER_ACINAR_DEVELOPMENT_LATE_2		253	0.202692	0.592383	0.927308	0.991994	1	2419	tags=21%, list=19%, signal=25%
RADAEVA_RESPONSE_TO_IFNA1_UP	RADAEVA_RESPONSE_TO_IFNA1_UP		51	0.25027	0.59008	0.928846	0.992412	1	3449	tags=33%, list=26%, signal=45%
GAVIN_FOXP3_TARGETS_CLUSTER_P7	GAVIN_FOXP3_TARGETS_CLUSTER_P7		62	0.187479	0.590005	0.99802	0.991767	1	608	tags=8%, list=5%, signal=8%
REACTOME_TRANSPORT_OF_RIBONUCLEOPROTEINS_INTO_THE_HOST_NUCLEUS	REACTOME_TRANSPORT_OF_RIBONUCLEOPROTEINS_INTO_THE_HOST_NUCLEUS		26	0.225618	0.588932	0.90795	0.991521	1	2215	tags=23%, list=17%, signal=28%
KYNG_ENVIRONMENTAL_STRESS_RESPONSE_NOT_BY_GAMMA_IN_WS	KYNG_ENVIRONMENTAL_STRESS_RESPONSE_NOT_BY_GAMMA_IN_WS		30	0.18211	0.587917	0.972387	0.991278	1	4	tags=3%, list=0%, signal=3%
SCHLOSSER_MYC_AND_SERUM_RESPONSE_SYNERGY	SCHLOSSER_MYC_AND_SERUM_RESPONSE_SYNERGY		29	0.204182	0.584827	0.927757	0.991983	1	2933	tags=28%, list=23%, signal=36%
YAO_TEMPORAL_RESPONSE_TO_PROGESTERONE_CLUSTER_14	YAO_TEMPORAL_RESPONSE_TO_PROGESTERONE_CLUSTER_14		115	0.164424	0.582352	0.96371	0.992403	1	3644	tags=30%, list=28%, signal=41%
REACTOME_O_LINKED_GLYCOSYLATION_OF_MUCINS	REACTOME_O_LINKED_GLYCOSYLATION_OF_MUCINS		33	0.197808	0.580971	0.981818	0.99232	1	716	tags=9%, list=5%, signal=10%
PYEON_CANCER_HEAD_AND_NECK_VS_CERVICAL_DN	PYEON_CANCER_HEAD_AND_NECK_VS_CERVICAL_DN		20	0.24192	0.579648	0.960784	0.992197	1	2563	tags=20%, list=20%, signal=25%
CHARAFE_BREAST_CANCER_BASAL_VS_MESENCHYMAL_UP	CHARAFE_BREAST_CANCER_BASAL_VS_MESENCHYMAL_UP		92	0.209827	0.577229	0.981519	0.992503	1	2945	tags=23%, list=23%, signal=29%
UROSEVIC_RESPONSE_TO_IMIQUIMOD	UROSEVIC_RESPONSE_TO_IMIQUIMOD		22	0.294662	0.573061	0.928983	0.993535	1	559	tags=14%, list=4%, signal=14%
SEITZ_NEOPLASTIC_TRANSFORMATION_BY_8P_DELETION_UP	SEITZ_NEOPLASTIC_TRANSFORMATION_BY_8P_DELETION_UP		70	0.238755	0.570402	0.986381	0.99388	1	2110	tags=26%, list=16%, signal=31%
NIKOLSKY_BREAST_CANCER_20Q11_AMPLICON	NIKOLSKY_BREAST_CANCER_20Q11_AMPLICON		21	0.189359	0.566522	0.931034	0.994653	1	4448	tags=43%, list=34%, signal=65%
SA_B_CELL_RECEPTOR_COMPLEXES	SA_B_CELL_RECEPTOR_COMPLEXES		24	0.185482	0.563673	0.96332	0.994961	1	1636	tags=13%, list=13%, signal=14%
GEISS_RESPONSE_TO_DSRNA_UP	GEISS_RESPONSE_TO_DSRNA_UP		36	0.225326	0.561113	0.978682	0.995144	1	2135	tags=22%, list=16%, signal=27%
REACTOME_G2_M_CHECKPOINTS	REACTOME_G2_M_CHECKPOINTS		31	0.288021	0.560797	0.881874	0.994562	1	2372	tags=32%, list=18%, signal=39%
REACTOME_DNA_REPLICATION	REACTOME_DNA_REPLICATION		160	0.208732	0.560475	0.873727	0.993983	1	2827	tags=28%, list=22%, signal=35%
IIZUKA_LIVER_CANCER_PROGRESSION_L0_L1_DN	IIZUKA_LIVER_CANCER_PROGRESSION_L0_L1_DN		20	0.214288	0.557745	0.923228	0.994187	1	3713	tags=35%, list=28%, signal=49%
COLIN_PILOCYTIC_ASTROCYTOMA_VS_GLIOBLASTOMA_DN	COLIN_PILOCYTIC_ASTROCYTOMA_VS_GLIOBLASTOMA_DN		25	0.19057	0.549191	0.986139	0.996156	1	3744	tags=40%, list=29%, signal=56%
REACTOME_CELL_CYCLE_MITOTIC	REACTOME_CELL_CYCLE_MITOTIC		258	0.178538	0.544845	0.945455	0.996736	1	3206	tags=29%, list=25%, signal=37%
MIKKELSEN_MCV6_LCP_WITH_H3K27ME3	MIKKELSEN_MCV6_LCP_WITH_H3K27ME3		15	0.21469	0.538051	0.976471	0.997903	1	1058	tags=13%, list=8%, signal=14%
CHUANG_OXIDATIVE_STRESS_RESPONSE_UP	CHUANG_OXIDATIVE_STRESS_RESPONSE_UP		24	0.216002	0.537566	0.994141	0.997341	1	3602	tags=46%, list=28%, signal=63%
REACTOME_MRNA_SPLICING_MINOR_PATHWAY	REACTOME_MRNA_SPLICING_MINOR_PATHWAY		34	0.178315	0.535287	0.917339	0.997231	1	3688	tags=32%, list=28%, signal=45%
XU_RESPONSE_TO_TRETINOIN_AND_NSC682994_UP	XU_RESPONSE_TO_TRETINOIN_AND_NSC682994_UP		17	0.231219	0.531765	0.976789	0.997413	1	1339	tags=18%, list=10%, signal=20%
KAUFFMANN_MELANOMA_RELAPSE_UP	KAUFFMANN_MELANOMA_RELAPSE_UP		53	0.235974	0.525691	0.913307	0.998101	1	2372	tags=28%, list=18%, signal=34%
TRACEY_RESISTANCE_TO_IFNA2_DN	TRACEY_RESISTANCE_TO_IFNA2_DN		28	0.196817	0.521817	0.992233	0.998254	1	4048	tags=43%, list=31%, signal=62%
FIGUEROA_AML_METHYLATION_CLUSTER_2_UP	FIGUEROA_AML_METHYLATION_CLUSTER_2_UP		37	0.164643	0.521713	0.993902	0.997598	1	3018	tags=22%, list=23%, signal=28%
REACTOME_MRNA_SPLICING	REACTOME_MRNA_SPLICING		71	0.163748	0.518567	0.959596	0.99759	1	3066	tags=27%, list=24%, signal=35%
LAIHO_COLORECTAL_CANCER_SERRATED_DN	LAIHO_COLORECTAL_CANCER_SERRATED_DN		71	0.154956	0.516156	0.995935	0.997385	1	3637	tags=30%, list=28%, signal=41%
VERNOCHET_ADIPOGENESIS	VERNOCHET_ADIPOGENESIS		17	0.208758	0.508796	0.998028	0.998043	1	3095	tags=35%, list=24%, signal=46%
NGO_MALIGNANT_GLIOMA_1P_LOH	NGO_MALIGNANT_GLIOMA_1P_LOH		15	0.203895	0.508418	0.956767	0.997434	1	2425	tags=27%, list=19%, signal=33%
REACTOME_MRNA_PROCESSING	REACTOME_MRNA_PROCESSING		115	0.155392	0.508306	0.960239	0.996784	1	3066	tags=24%, list=24%, signal=32%
PID_ATR_PATHWAY	PID_ATR_PATHWAY		36	0.2148	0.507248	0.972056	0.996285	1	2971	tags=28%, list=23%, signal=36%
SANA_TNF_SIGNALING_DN	SANA_TNF_SIGNALING_DN		72	0.180248	0.504023	0.988615	0.996171	1	3373	tags=32%, list=26%, signal=43%
NIKOLSKY_BREAST_CANCER_1Q21_AMPLICON	NIKOLSKY_BREAST_CANCER_1Q21_AMPLICON		26	0.201559	0.500825	0.965235	0.99602	1	3470	tags=31%, list=27%, signal=42%
GROSS_ELK3_TARGETS_UP	GROSS_ELK3_TARGETS_UP		25	0.211992	0.500535	0.996183	0.99539	1	2802	tags=32%, list=21%, signal=41%
HOLLEMAN_PREDNISOLONE_RESISTANCE_ALL_UP	HOLLEMAN_PREDNISOLONE_RESISTANCE_ALL_UP		17	0.181406	0.495366	0.982143	0.995507	1	3445	tags=29%, list=26%, signal=40%
REACTOME_PROCESSING_OF_CAPPED_INTRON_CONTAINING_PRE_MRNA	REACTOME_PROCESSING_OF_CAPPED_INTRON_CONTAINING_PRE_MRNA		99	0.155267	0.485328	0.975708	0.996178	1	3066	tags=25%, list=24%, signal=33%
KYNG_ENVIRONMENTAL_STRESS_RESPONSE_UP	KYNG_ENVIRONMENTAL_STRESS_RESPONSE_UP		53	0.157742	0.482824	1	0.995843	1	2319	tags=17%, list=18%, signal=21%
REACTOME_ACTIVATION_OF_ATR_IN_RESPONSE_TO_REPLICATION_STRESS	REACTOME_ACTIVATION_OF_ATR_IN_RESPONSE_TO_REPLICATION_STRESS		26	0.241002	0.466789	0.953347	0.996948	1	2372	tags=31%, list=18%, signal=38%
LEONARD_HYPOXIA	LEONARD_HYPOXIA		40	0.167496	0.447632	1	0.99788	1	3662	tags=35%, list=28%, signal=49%
GHO_ATF5_TARGETS_DN	GHO_ATF5_TARGETS_DN		15	0.191462	0.42023	0.99802	0.998746	1	1502	tags=13%, list=12%, signal=15%
MEISSNER_ES_ICP_WITH_H3K4ME3	MEISSNER_ES_ICP_WITH_H3K4ME3		21	0.121685	0.394195	1	0.998982	1	1820	tags=10%, list=14%, signal=11%

## Sheet: Table S2
Table S2. GSEA results of c5 reference gene sets for high ERCC8 expression groups.
NAME	GS<br> follow link to MSigDB	GS DETAILS	SIZE	ES	NES	NOM p-val	FDR q-val	FWER p-val	RANK AT MAX	LEADING EDGE
GO_NIK_NF_KAPPAB_SIGNALING	GO_NIK_NF_KAPPAB_SIGNALING	Details ...	76	0.540058	1.90501	0.00592885	1	0.48	3316	tags=49%, list=25%, signal=65%
GO_ORGANELLE_INNER_MEMBRANE	GO_ORGANELLE_INNER_MEMBRANE	Details ...	370	0.50604	1.85815	0.0039604	0.955791	0.672	3418	tags=54%, list=26%, signal=72%
GO_AEROBIC_RESPIRATION	GO_AEROBIC_RESPIRATION	Details ...	46	0.613053	1.83916	0.00384615	0.81821	0.755	2655	tags=57%, list=20%, signal=71%
GO_MITOCHONDRIAL_ENVELOPE	GO_MITOCHONDRIAL_ENVELOPE	Details ...	486	0.477236	1.83455	0.00194932	0.64665	0.766	3275	tags=48%, list=25%, signal=62%
GO_THREONINE_TYPE_PEPTIDASE_ACTIVITY	GO_THREONINE_TYPE_PEPTIDASE_ACTIVITY	Details ...	18	0.734015	1.82881	0.00194175	0.556622	0.785	2827	tags=72%, list=22%, signal=92%
GO_NAD_BINDING	GO_NAD_BINDING	Details ...	51	0.60323	1.81825	0	0.535121	0.826	2573	tags=49%, list=20%, signal=61%
GO_PROTEIN_ADP_RIBOSYLATION	GO_PROTEIN_ADP_RIBOSYLATION	Details ...	18	0.581379	1.81397	0.00207039	0.481945	0.834	2213	tags=44%, list=17%, signal=53%
GO_CARBON_CARBON_LYASE_ACTIVITY	GO_CARBON_CARBON_LYASE_ACTIVITY	Details ...	39	0.697292	1.81192	0.00188324	0.432411	0.84	1983	tags=56%, list=15%, signal=66%
GO_RESPIRATORY_CHAIN	GO_RESPIRATORY_CHAIN	Details ...	65	0.514012	1.80985	0.0260521	0.392941	0.842	4165	tags=69%, list=32%, signal=101%
GO_CELLULAR_RESPIRATION	GO_CELLULAR_RESPIRATION	Details ...	120	0.533368	1.80435	0.0118577	0.380526	0.857	3127	tags=53%, list=24%, signal=70%
GO_MITOCHONDRIAL_PROTEIN_COMPLEX	GO_MITOCHONDRIAL_PROTEIN_COMPLEX	Details ...	104	0.502443	1.80074	0.0180361	0.360772	0.863	4103	tags=65%, list=31%, signal=95%
GO_INNER_MITOCHONDRIAL_MEMBRANE_PROTEIN_COMPLEX	GO_INNER_MITOCHONDRIAL_MEMBRANE_PROTEIN_COMPLEX	Details ...	81	0.502856	1.79497	0.0183673	0.352706	0.877	4211	tags=68%, list=32%, signal=100%
GO_TRANSLATIONAL_TERMINATION	GO_TRANSLATIONAL_TERMINATION	Details ...	59	0.613245	1.79323	0.00994036	0.332733	0.881	3213	tags=61%, list=25%, signal=81%
GO_OXIDOREDUCTASE_COMPLEX	GO_OXIDOREDUCTASE_COMPLEX	Details ...	81	0.517664	1.78985	0.00589391	0.321186	0.884	3149	tags=51%, list=24%, signal=66%
GO_OXIDOREDUCTASE_ACTIVITY_ACTING_ON_NAD_P_H_QUINONE_OR_SIMILAR_COMPOUND_AS_ACCEPTOR	GO_OXIDOREDUCTASE_ACTIVITY_ACTING_ON_NAD_P_H_QUINONE_OR_SIMILAR_COMPOUND_AS_ACCEPTOR	Details ...	45	0.641939	1.78861	0.00195312	0.304261	0.886	3521	tags=69%, list=27%, signal=94%
GO_ELECTRON_TRANSPORT_CHAIN	GO_ELECTRON_TRANSPORT_CHAIN	Details ...	77	0.532276	1.78171	0.0157171	0.309782	0.909	3521	tags=58%, list=27%, signal=80%
GO_MITOCHONDRIAL_MATRIX	GO_MITOCHONDRIAL_MATRIX	Details ...	314	0.573739	1.77693	0.00201613	0.3091	0.915	2833	tags=52%, list=22%, signal=65%
GO_ENERGY_DERIVATION_BY_OXIDATION_OF_ORGANIC_COMPOUNDS	GO_ENERGY_DERIVATION_BY_OXIDATION_OF_ORGANIC_COMPOUNDS	Details ...	181	0.503818	1.77203	0.00779727	0.308297	0.927	3079	tags=46%, list=24%, signal=60%
GO_MICROBODY_MEMBRANE	GO_MICROBODY_MEMBRANE	Details ...	47	0.6699	1.77109	0.0019685	0.29597	0.927	1689	tags=51%, list=13%, signal=58%
GO_PEROXISOME_ORGANIZATION	GO_PEROXISOME_ORGANIZATION	Details ...	27	0.662151	1.76287	0.00378072	0.308457	0.939	1683	tags=56%, list=13%, signal=64%
GO_TRANSLATIONAL_ELONGATION	GO_TRANSLATIONAL_ELONGATION	Details ...	72	0.540423	1.75982	0.0179283	0.304408	0.944	3297	tags=53%, list=25%, signal=70%
GO_OXIDATIVE_PHOSPHORYLATION	GO_OXIDATIVE_PHOSPHORYLATION	Details ...	69	0.519832	1.7593	0.0280561	0.292215	0.944	3521	tags=59%, list=27%, signal=81%
GO_ANTEROGRADE_AXONAL_TRANSPORT	GO_ANTEROGRADE_AXONAL_TRANSPORT	Details ...	17	0.601106	1.75517	0.00787402	0.292333	0.952	2498	tags=47%, list=19%, signal=58%
GO_TRICARBOXYLIC_ACID_METABOLIC_PROCESS	GO_TRICARBOXYLIC_ACID_METABOLIC_PROCESS	Details ...	36	0.66033	1.751	0.00798403	0.29335	0.955	2655	tags=61%, list=20%, signal=77%
GO_MICROBODY_PART	GO_MICROBODY_PART	Details ...	75	0.694415	1.74862	0	0.289239	0.956	1689	tags=56%, list=13%, signal=64%
GO_REGULATION_OF_CELLULAR_AMINO_ACID_METABOLIC_PROCESS	GO_REGULATION_OF_CELLULAR_AMINO_ACID_METABOLIC_PROCESS	Details ...	60	0.53225	1.74693	0.0195695	0.283438	0.96	3316	tags=55%, list=25%, signal=73%
GO_MITOCHONDRIAL_ATP_SYNTHESIS_COUPLED_PROTON_TRANSPORT	GO_MITOCHONDRIAL_ATP_SYNTHESIS_COUPLED_PROTON_TRANSPORT	Details ...	17	0.625807	1.74305	0.0227273	0.284391	0.964	3394	tags=59%, list=26%, signal=79%
GO_CARBOXY_LYASE_ACTIVITY	GO_CARBOXY_LYASE_ACTIVITY	Details ...	27	0.658442	1.73926	0.00381679	0.285289	0.968	1983	tags=48%, list=15%, signal=57%
GO_PROTEIN_DEGLYCOSYLATION	GO_PROTEIN_DEGLYCOSYLATION	Details ...	18	0.724087	1.73612	0.00588235	0.285347	0.971	2095	tags=67%, list=16%, signal=79%
GO_ENERGY_RESERVE_METABOLIC_PROCESS	GO_ENERGY_RESERVE_METABOLIC_PROCESS	Details ...	59	0.545928	1.73125	0.00190114	0.290918	0.972	1142	tags=29%, list=9%, signal=31%
GO_TOXIN_TRANSPORT	GO_TOXIN_TRANSPORT	Details ...	31	0.525035	1.72892	0.0159046	0.288369	0.976	3707	tags=65%, list=28%, signal=90%
GO_CELLULAR_METABOLIC_COMPOUND_SALVAGE	GO_CELLULAR_METABOLIC_COMPOUND_SALVAGE	Details ...	27	0.624897	1.72639	0.00389864	0.286593	0.977	2028	tags=37%, list=16%, signal=44%
GO_MITOCHONDRIAL_MEMBRANE_PART	GO_MITOCHONDRIAL_MEMBRANE_PART	Details ...	129	0.453374	1.72539	0.0283401	0.280541	0.978	4263	tags=62%, list=33%, signal=91%
GO_NUCLEOID	GO_NUCLEOID	Details ...	39	0.567981	1.7233	0.018	0.278879	0.981	2831	tags=56%, list=22%, signal=72%
GO_MICROBODY	GO_MICROBODY	Details ...	104	0.649131	1.72192	0.00195312	0.27537	0.981	2431	tags=59%, list=19%, signal=72%
GO_NADH_DEHYDROGENASE_COMPLEX	GO_NADH_DEHYDROGENASE_COMPLEX	Details ...	36	0.557035	1.72127	0.0324544	0.269621	0.981	4165	tags=69%, list=32%, signal=102%
GO_COFACTOR_BIOSYNTHETIC_PROCESS	GO_COFACTOR_BIOSYNTHETIC_PROCESS	Details ...	124	0.558439	1.72113	0.00196078	0.262754	0.981	2968	tags=54%, list=23%, signal=69%
GO_ASPARTATE_FAMILY_AMINO_ACID_METABOLIC_PROCESS	GO_ASPARTATE_FAMILY_AMINO_ACID_METABOLIC_PROCESS	Details ...	42	0.676038	1.71994	0.00395257	0.259132	0.983	1578	tags=55%, list=12%, signal=62%
GO_MITOCHONDRIAL_RESPIRATORY_CHAIN_COMPLEX_ASSEMBLY	GO_MITOCHONDRIAL_RESPIRATORY_CHAIN_COMPLEX_ASSEMBLY	Details ...	48	0.525087	1.71874	0.0419162	0.255728	0.983	3521	tags=60%, list=27%, signal=82%
GO_CYTOCHROME_COMPLEX	GO_CYTOCHROME_COMPLEX	Details ...	15	0.582256	1.71642	0.0323232	0.255352	0.983	3214	tags=73%, list=25%, signal=97%
GO_PROTEASOME_COMPLEX	GO_PROTEASOME_COMPLEX	Details ...	63	0.522284	1.71597	0.0368932	0.250163	0.983	3417	tags=54%, list=26%, signal=73%
GO_ORGANELLAR_RIBOSOME	GO_ORGANELLAR_RIBOSOME	Details ...	49	0.588451	1.71447	0.0333333	0.248086	0.983	3213	tags=59%, list=25%, signal=78%
GO_GENERATION_OF_PRECURSOR_METABOLITES_AND_ENERGY	GO_GENERATION_OF_PRECURSOR_METABOLITES_AND_ENERGY	Details ...	249	0.468418	1.71335	0.0117417	0.244887	0.985	3039	tags=44%, list=23%, signal=57%
GO_SINGLE_ORGANISM_MEMBRANE_BUDDING	GO_SINGLE_ORGANISM_MEMBRANE_BUDDING	Details ...	58	0.54177	1.70771	0.015444	0.254089	0.987	2631	tags=53%, list=20%, signal=67%
GO_CELLULAR_CARBOHYDRATE_CATABOLIC_PROCESS	GO_CELLULAR_CARBOHYDRATE_CATABOLIC_PROCESS	Details ...	28	0.608923	1.70705	0.00380228	0.25014	0.987	1621	tags=36%, list=12%, signal=41%
GO_GLYCOSYL_COMPOUND_METABOLIC_PROCESS	GO_GLYCOSYL_COMPOUND_METABOLIC_PROCESS	Details ...	305	0.429134	1.70544	0.00192678	0.248706	0.987	3103	tags=43%, list=24%, signal=55%
GO_NUCLEOSIDE_TRIPHOSPHATE_METABOLIC_PROCESS	GO_NUCLEOSIDE_TRIPHOSPHATE_METABOLIC_PROCESS	Details ...	188	0.433276	1.70383	0.0179283	0.247612	0.991	3564	tags=51%, list=27%, signal=69%
GO_ALPHA_AMINO_ACID_METABOLIC_PROCESS	GO_ALPHA_AMINO_ACID_METABOLIC_PROCESS	Details ...	186	0.619842	1.7006	0.00194553	0.25068	0.991	1852	tags=50%, list=14%, signal=57%
GO_MITOCHONDRIAL_TRANSLATION	GO_MITOCHONDRIAL_TRANSLATION	Details ...	65	0.579006	1.69991	0.0423387	0.247529	0.991	3430	tags=63%, list=26%, signal=85%
GO_VESICLE_COATING	GO_VESICLE_COATING	Details ...	61	0.539553	1.69782	0.0206767	0.247835	0.992	2631	tags=51%, list=20%, signal=63%
GO_REGULATION_OF_CELLULAR_AMINE_METABOLIC_PROCESS	GO_REGULATION_OF_CELLULAR_AMINE_METABOLIC_PROCESS	Details ...	80	0.451327	1.69649	0.00984252	0.246551	0.993	3316	tags=49%, list=25%, signal=65%
GO_LYASE_ACTIVITY	GO_LYASE_ACTIVITY	Details ...	143	0.524784	1.69615	0	0.242556	0.993	2004	tags=40%, list=15%, signal=47%
GO_PROTEIN_AUTOUBIQUITINATION	GO_PROTEIN_AUTOUBIQUITINATION	Details ...	35	0.513369	1.69239	0.0116959	0.246848	0.995	3168	tags=54%, list=24%, signal=72%
GO_GLUCAN_METABOLIC_PROCESS	GO_GLUCAN_METABOLIC_PROCESS	Details ...	48	0.570507	1.68911	0	0.250584	0.995	1107	tags=31%, list=8%, signal=34%
GO_ER_TO_GOLGI_VESICLE_MEDIATED_TRANSPORT	GO_ER_TO_GOLGI_VESICLE_MEDIATED_TRANSPORT	Details ...	131	0.471123	1.68616	0.00943396	0.253476	0.996	2702	tags=44%, list=21%, signal=54%
GO_GPI_ANCHOR_METABOLIC_PROCESS	GO_GPI_ANCHOR_METABOLIC_PROCESS	Details ...	23	0.631054	1.68421	0.00387597	0.254049	0.996	2187	tags=57%, list=17%, signal=68%
GO_CELLULAR_AMINO_ACID_METABOLIC_PROCESS	GO_CELLULAR_AMINO_ACID_METABOLIC_PROCESS	Details ...	263	0.565128	1.68081	0.00194175	0.25813	0.997	1852	tags=44%, list=14%, signal=51%
GO_PROTON_TRANSPORTING_ATP_SYNTHASE_COMPLEX	GO_PROTON_TRANSPORTING_ATP_SYNTHASE_COMPLEX	Details ...	19	0.634889	1.68064	0.0220884	0.254131	0.997	3394	tags=63%, list=26%, signal=85%
GO_CELLULAR_PROTEIN_COMPLEX_DISASSEMBLY	GO_CELLULAR_PROTEIN_COMPLEX_DISASSEMBLY	Details ...	81	0.495208	1.67689	0.0282828	0.259756	0.997	3213	tags=51%, list=25%, signal=67%
GO_COENZYME_BIOSYNTHETIC_PROCESS	GO_COENZYME_BIOSYNTHETIC_PROCESS	Details ...	95	0.559128	1.67481	0.00776699	0.261307	0.997	3036	tags=56%, list=23%, signal=72%
GO_SMALL_MOLECULE_CATABOLIC_PROCESS	GO_SMALL_MOLECULE_CATABOLIC_PROCESS	Details ...	266	0.611151	1.67143	0.0113852	0.265741	0.998	2080	tags=51%, list=16%, signal=59%
GO_GTP_DEPENDENT_PROTEIN_BINDING	GO_GTP_DEPENDENT_PROTEIN_BINDING	Details ...	16	0.611822	1.67022	0.00614754	0.264684	0.998	1095	tags=31%, list=8%, signal=34%
GO_LIPOPROTEIN_BIOSYNTHETIC_PROCESS	GO_LIPOPROTEIN_BIOSYNTHETIC_PROCESS	Details ...	59	0.482055	1.66755	0.00775194	0.267459	0.999	2272	tags=37%, list=17%, signal=45%
GO_COENZYME_BINDING	GO_COENZYME_BINDING	Details ...	157	0.56505	1.66618	0.0095057	0.26674	0.999	2735	tags=50%, list=21%, signal=63%
GO_PROTEASOME_ACCESSORY_COMPLEX	GO_PROTEASOME_ACCESSORY_COMPLEX	Details ...	24	0.592826	1.66605	0.0444015	0.263003	0.999	3602	tags=58%, list=28%, signal=80%
GO_MITOCHONDRIAL_RESPIRATORY_CHAIN_COMPLEX_I_BIOGENESIS	GO_MITOCHONDRIAL_RESPIRATORY_CHAIN_COMPLEX_I_BIOGENESIS	Details ...	42	0.532811	1.66604	0.0525253	0.259027	0.999	3149	tags=57%, list=24%, signal=75%
GO_OXIDOREDUCTASE_ACTIVITY_ACTING_ON_NAD_P_H	GO_OXIDOREDUCTASE_ACTIVITY_ACTING_ON_NAD_P_H	Details ...	78	0.505601	1.6628	0.0232558	0.263053	1	3521	tags=56%, list=27%, signal=77%
GO_SNARE_COMPLEX	GO_SNARE_COMPLEX	Details ...	42	0.513377	1.66257	0.00978474	0.25973	1	3684	tags=52%, list=28%, signal=73%
GO_METAL_CLUSTER_BINDING	GO_METAL_CLUSTER_BINDING	Details ...	48	0.563794	1.66225	0.0230769	0.256832	1	2479	tags=54%, list=19%, signal=67%
GO_GLYOXYLATE_METABOLIC_PROCESS	GO_GLYOXYLATE_METABOLIC_PROCESS	Details ...	25	0.756313	1.66225	0.00387597	0.253163	1	1651	tags=68%, list=13%, signal=78%
GO_THIOESTER_METABOLIC_PROCESS	GO_THIOESTER_METABOLIC_PROCESS	Details ...	58	0.634993	1.6537	0.00589391	0.270538	1	3268	tags=69%, list=25%, signal=92%
GO_COFACTOR_BINDING	GO_COFACTOR_BINDING	Details ...	218	0.568885	1.65195	0.0232108	0.271038	1	2573	tags=50%, list=20%, signal=62%
GO_VESICLE_TARGETING	GO_VESICLE_TARGETING	Details ...	63	0.535104	1.65106	0.0283019	0.269425	1	2631	tags=52%, list=20%, signal=65%
GO_BRANCHED_CHAIN_AMINO_ACID_METABOLIC_PROCESS	GO_BRANCHED_CHAIN_AMINO_ACID_METABOLIC_PROCESS	Details ...	22	0.725798	1.64908	0.00792079	0.270854	1	2398	tags=73%, list=18%, signal=89%
GO_COFACTOR_METABOLIC_PROCESS	GO_COFACTOR_METABOLIC_PROCESS	Details ...	267	0.554029	1.64861	0.00584795	0.268441	1	2455	tags=48%, list=19%, signal=58%
GO_ORGANELLAR_LARGE_RIBOSOMAL_SUBUNIT	GO_ORGANELLAR_LARGE_RIBOSOMAL_SUBUNIT	Details ...	20	0.612428	1.64723	0.0481696	0.268471	1	3418	tags=60%, list=26%, signal=81%
GO_COENZYME_METABOLIC_PROCESS	GO_COENZYME_METABOLIC_PROCESS	Details ...	212	0.55539	1.64576	0.00587084	0.268367	1	1986	tags=43%, list=15%, signal=50%
GO_CARBOHYDRATE_CATABOLIC_PROCESS	GO_CARBOHYDRATE_CATABOLIC_PROCESS	Details ...	99	0.518588	1.645	0.0095057	0.266821	1	1621	tags=36%, list=12%, signal=41%
GO_CARBON_OXYGEN_LYASE_ACTIVITY	GO_CARBON_OXYGEN_LYASE_ACTIVITY	Details ...	58	0.555103	1.63873	0.0078125	0.279502	1	2916	tags=53%, list=22%, signal=69%
GO_ELECTRON_CARRIER_ACTIVITY	GO_ELECTRON_CARRIER_ACTIVITY	Details ...	95	0.598006	1.63652	0.00788955	0.281501	1	2952	tags=58%, list=23%, signal=74%
GO_PROTEIN_TRANSMEMBRANE_TRANSPORT	GO_PROTEIN_TRANSMEMBRANE_TRANSPORT	Details ...	42	0.50999	1.63238	0.0287908	0.288429	1	2640	tags=43%, list=20%, signal=54%
GO_OXIDOREDUCTASE_ACTIVITY_ACTING_ON_CH_OH_GROUP_OF_DONORS	GO_OXIDOREDUCTASE_ACTIVITY_ACTING_ON_CH_OH_GROUP_OF_DONORS	Details ...	104	0.638645	1.63204	0.00589391	0.285934	1	1838	tags=48%, list=14%, signal=56%
GO_METHIONINE_METABOLIC_PROCESS	GO_METHIONINE_METABOLIC_PROCESS	Details ...	16	0.728397	1.62975	0.0077821	0.288509	1	1578	tags=56%, list=12%, signal=64%
GO_NUCLEOBASE_CONTAINING_SMALL_MOLECULE_METABOLIC_PROCESS	GO_NUCLEOBASE_CONTAINING_SMALL_MOLECULE_METABOLIC_PROCESS	Details ...	439	0.398648	1.62424	0	0.299426	1	3139	tags=40%, list=24%, signal=51%
GO_MITOCHONDRIAL_TRANSMEMBRANE_TRANSPORT	GO_MITOCHONDRIAL_TRANSMEMBRANE_TRANSPORT	Details ...	45	0.522859	1.62285	0.0386965	0.299323	1	3394	tags=58%, list=26%, signal=78%
GO_TRANSFERASE_ACTIVITY_TRANSFERRING_ONE_CARBON_GROUPS	GO_TRANSFERASE_ACTIVITY_TRANSFERRING_ONE_CARBON_GROUPS	Details ...	136	0.435092	1.62073	0.00772201	0.301679	1	2301	tags=29%, list=18%, signal=34%
GO_MITOCHONDRION_ORGANIZATION	GO_MITOCHONDRION_ORGANIZATION	Details ...	418	0.367149	1.6203	0.015444	0.299509	1	3272	tags=40%, list=25%, signal=52%
GO_CELLULAR_KETONE_METABOLIC_PROCESS	GO_CELLULAR_KETONE_METABOLIC_PROCESS	Details ...	56	0.630875	1.61885	0.00798403	0.299871	1	2370	tags=54%, list=18%, signal=65%
GO_CELLULAR_ALDEHYDE_METABOLIC_PROCESS	GO_CELLULAR_ALDEHYDE_METABOLIC_PROCESS	Details ...	69	0.62554	1.61696	0.00968992	0.301096	1	1770	tags=49%, list=14%, signal=57%
GO_ORGANIC_ACID_CATABOLIC_PROCESS	GO_ORGANIC_ACID_CATABOLIC_PROCESS	Details ...	163	0.68192	1.61641	0.0209524	0.299525	1	1976	tags=61%, list=15%, signal=71%
GO_TRANSFERASE_ACTIVITY_TRANSFERRING_NITROGENOUS_GROUPS	GO_TRANSFERASE_ACTIVITY_TRANSFERRING_NITROGENOUS_GROUPS	Details ...	17	0.764731	1.61545	0.003861	0.298565	1	1629	tags=71%, list=12%, signal=81%
GO_ARGININE_METABOLIC_PROCESS	GO_ARGININE_METABOLIC_PROCESS	Details ...	15	0.774627	1.61277	0.00976562	0.302791	1	1542	tags=60%, list=12%, signal=68%
GO_NUCLEOSIDE_MONOPHOSPHATE_METABOLIC_PROCESS	GO_NUCLEOSIDE_MONOPHOSPHATE_METABOLIC_PROCESS	Details ...	204	0.388987	1.61273	0.0237624	0.299641	1	3584	tags=46%, list=27%, signal=62%
GO_CELLULAR_AMINO_ACID_BIOSYNTHETIC_PROCESS	GO_CELLULAR_AMINO_ACID_BIOSYNTHETIC_PROCESS	Details ...	75	0.618297	1.61078	0.00773694	0.301627	1	1604	tags=48%, list=12%, signal=54%
GO_MEMBRANE_BUDDING	GO_MEMBRANE_BUDDING	Details ...	88	0.466333	1.61044	0.0316574	0.299265	1	3340	tags=53%, list=26%, signal=71%
GO_ORGANIC_ACID_BIOSYNTHETIC_PROCESS	GO_ORGANIC_ACID_BIOSYNTHETIC_PROCESS	Details ...	213	0.540173	1.61011	0.0115385	0.297087	1	1760	tags=39%, list=14%, signal=45%
GO_SMALL_MOLECULE_BIOSYNTHETIC_PROCESS	GO_SMALL_MOLECULE_BIOSYNTHETIC_PROCESS	Details ...	352	0.517513	1.6092	0.0077821	0.296323	1	1898	tags=37%, list=15%, signal=42%
GO_S_ADENOSYLMETHIONINE_METABOLIC_PROCESS	GO_S_ADENOSYLMETHIONINE_METABOLIC_PROCESS	Details ...	16	0.751509	1.60773	0.0117188	0.297008	1	1109	tags=56%, list=9%, signal=61%
GO_CELLULAR_AMINO_ACID_CATABOLIC_PROCESS	GO_CELLULAR_AMINO_ACID_CATABOLIC_PROCESS	Details ...	89	0.709505	1.60707	0.0134357	0.295746	1	1654	tags=62%, list=13%, signal=70%
GO_GLUTAMINE_FAMILY_AMINO_ACID_METABOLIC_PROCESS	GO_GLUTAMINE_FAMILY_AMINO_ACID_METABOLIC_PROCESS	Details ...	56	0.605513	1.60491	0.0148699	0.298112	1	1633	tags=46%, list=13%, signal=53%
GO_PHOSPHOLIPID_CATABOLIC_PROCESS	GO_PHOSPHOLIPID_CATABOLIC_PROCESS	Details ...	19	0.618917	1.60461	0.0179641	0.295915	1	925	tags=32%, list=7%, signal=34%
GO_POLYSACCHARIDE_METABOLIC_PROCESS	GO_POLYSACCHARIDE_METABOLIC_PROCESS	Details ...	64	0.485099	1.60182	0.00193424	0.299846	1	1107	tags=27%, list=8%, signal=29%
GO_PURINE_CONTAINING_COMPOUND_METABOLIC_PROCESS	GO_PURINE_CONTAINING_COMPOUND_METABOLIC_PROCESS	Details ...	332	0.39694	1.60142	0.00785855	0.297962	1	3079	tags=39%, list=24%, signal=50%
GO_CELLULAR_CARBOHYDRATE_METABOLIC_PROCESS	GO_CELLULAR_CARBOHYDRATE_METABOLIC_PROCESS	Details ...	113	0.462262	1.60041	0.0115607	0.297618	1	1107	tags=27%, list=8%, signal=29%
GO_POST_TRANSLATIONAL_PROTEIN_MODIFICATION	GO_POST_TRANSLATIONAL_PROTEIN_MODIFICATION	Details ...	19	0.61641	1.60007	0.0152964	0.29554	1	2519	tags=53%, list=19%, signal=65%
GO_MITOCHONDRIAL_TRANSPORT	GO_MITOCHONDRIAL_TRANSPORT	Details ...	140	0.415055	1.59828	0.0215264	0.297126	1	3034	tags=42%, list=23%, signal=54%
GO_REGULATION_OF_CELLULAR_KETONE_METABOLIC_PROCESS	GO_REGULATION_OF_CELLULAR_KETONE_METABOLIC_PROCESS	Details ...	142	0.452665	1.59629	0.00584795	0.2995	1	3316	tags=49%, list=25%, signal=64%
GO_REGULATION_OF_SULFUR_METABOLIC_PROCESS	GO_REGULATION_OF_SULFUR_METABOLIC_PROCESS	Details ...	17	0.639209	1.59586	0.0135922	0.297873	1	3036	tags=65%, list=23%, signal=84%
GO_NEGATIVE_REGULATION_OF_FATTY_ACID_METABOLIC_PROCESS	GO_NEGATIVE_REGULATION_OF_FATTY_ACID_METABOLIC_PROCESS	Details ...	19	0.712253	1.59453	0.0281426	0.298476	1	2213	tags=58%, list=17%, signal=70%
GO_OXIDOREDUCTASE_ACTIVITY_ACTING_ON_THE_CH_OH_GROUP_OF_DONORS_NAD_OR_NADP_AS_ACCEPTOR	GO_OXIDOREDUCTASE_ACTIVITY_ACTING_ON_THE_CH_OH_GROUP_OF_DONORS_NAD_OR_NADP_AS_ACCEPTOR	Details ...	90	0.610744	1.59152	0.00982318	0.303856	1	1838	tags=47%, list=14%, signal=54%
GO_TRANSFERASE_ACTIVITY_TRANSFERRING_ALKYL_OR_ARYL_OTHER_THAN_METHYL_GROUPS	GO_TRANSFERASE_ACTIVITY_TRANSFERRING_ALKYL_OR_ARYL_OTHER_THAN_METHYL_GROUPS	Details ...	52	0.509953	1.59086	0.0120724	0.302799	1	2344	tags=40%, list=18%, signal=49%
GO_DICARBOXYLIC_ACID_METABOLIC_PROCESS	GO_DICARBOXYLIC_ACID_METABOLIC_PROCESS	Details ...	81	0.574588	1.59082	0.01	0.300245	1	1871	tags=52%, list=14%, signal=60%
GO_ALPHA_AMINO_ACID_CATABOLIC_PROCESS	GO_ALPHA_AMINO_ACID_CATABOLIC_PROCESS	Details ...	74	0.72005	1.58868	0.0153846	0.302907	1	1852	tags=66%, list=14%, signal=77%
GO_ORGANELLAR_SMALL_RIBOSOMAL_SUBUNIT	GO_ORGANELLAR_SMALL_RIBOSOMAL_SUBUNIT	Details ...	17	0.640987	1.58751	0.0514851	0.302957	1	3129	tags=65%, list=24%, signal=85%
GO_ALDO_KETO_REDUCTASE_NADP_ACTIVITY	GO_ALDO_KETO_REDUCTASE_NADP_ACTIVITY	Details ...	20	0.705665	1.58538	0.0246679	0.305758	1	2175	tags=65%, list=17%, signal=78%
GO_NEGATIVE_REGULATION_OF_MITOCHONDRION_ORGANIZATION	GO_NEGATIVE_REGULATION_OF_MITOCHONDRION_ORGANIZATION	Details ...	31	0.5394	1.58425	0.0208333	0.305742	1	3206	tags=58%, list=25%, signal=77%
GO_SERINE_FAMILY_AMINO_ACID_METABOLIC_PROCESS	GO_SERINE_FAMILY_AMINO_ACID_METABOLIC_PROCESS	Details ...	34	0.724721	1.58416	0.00784314	0.303363	1	1629	tags=65%, list=12%, signal=74%
GO_THIOESTER_BIOSYNTHETIC_PROCESS	GO_THIOESTER_BIOSYNTHETIC_PROCESS	Details ...	38	0.600747	1.58376	0.0213592	0.301777	1	3237	tags=61%, list=25%, signal=80%
GO_VITAMIN_BINDING	GO_VITAMIN_BINDING	Details ...	68	0.501755	1.58322	0.0154739	0.300575	1	1856	tags=37%, list=14%, signal=43%
GO_PEROXISOMAL_TRANSPORT	GO_PEROXISOMAL_TRANSPORT	Details ...	17	0.621732	1.58239	0.0269231	0.299864	1	868	tags=41%, list=7%, signal=44%
GO_UNFOLDED_PROTEIN_BINDING	GO_UNFOLDED_PROTEIN_BINDING	Details ...	78	0.45431	1.58141	0.0318352	0.299847	1	2161	tags=31%, list=17%, signal=37%
GO_PYRIDOXAL_PHOSPHATE_BINDING	GO_PYRIDOXAL_PHOSPHATE_BINDING	Details ...	37	0.676908	1.58066	0.0194553	0.299201	1	1556	tags=59%, list=12%, signal=67%
GO_ALPHA_AMINO_ACID_BIOSYNTHETIC_PROCESS	GO_ALPHA_AMINO_ACID_BIOSYNTHETIC_PROCESS	Details ...	63	0.608687	1.58055	0.00970874	0.29701	1	1604	tags=46%, list=12%, signal=52%
GO_FATTY_ACID_METABOLIC_PROCESS	GO_FATTY_ACID_METABOLIC_PROCESS	Details ...	226	0.526408	1.58046	0.019084	0.294832	1	1932	tags=41%, list=15%, signal=47%
GO_KETONE_BIOSYNTHETIC_PROCESS	GO_KETONE_BIOSYNTHETIC_PROCESS	Details ...	23	0.5767	1.58036	0.0382294	0.292769	1	3526	tags=52%, list=27%, signal=71%
GO_REGULATION_OF_TRANSLATIONAL_ELONGATION	GO_REGULATION_OF_TRANSLATIONAL_ELONGATION	Details ...	17	0.567181	1.57897	0.0465587	0.293644	1	3220	tags=59%, list=25%, signal=78%
GO_MONOCARBOXYLIC_ACID_METABOLIC_PROCESS	GO_MONOCARBOXYLIC_ACID_METABOLIC_PROCESS	Details ...	398	0.527781	1.57773	0.0151229	0.294199	1	2094	tags=42%, list=16%, signal=48%
GO_ORGANONITROGEN_COMPOUND_CATABOLIC_PROCESS	GO_ORGANONITROGEN_COMPOUND_CATABOLIC_PROCESS	Details ...	274	0.496117	1.57204	0.0196078	0.3059	1	1745	tags=36%, list=13%, signal=41%
GO_CLATHRIN_ADAPTOR_COMPLEX	GO_CLATHRIN_ADAPTOR_COMPLEX	Details ...	21	0.549581	1.57113	0.0384615	0.305688	1	2112	tags=33%, list=16%, signal=40%
GO_CELLULAR_LIPID_CATABOLIC_PROCESS	GO_CELLULAR_LIPID_CATABOLIC_PROCESS	Details ...	115	0.563301	1.57074	0.0192308	0.304301	1	2764	tags=57%, list=21%, signal=72%
GO_OXIDOREDUCTASE_ACTIVITY_ACTING_ON_THE_CH_CH_GROUP_OF_DONORS	GO_OXIDOREDUCTASE_ACTIVITY_ACTING_ON_THE_CH_CH_GROUP_OF_DONORS	Details ...	48	0.654833	1.57041	0.023301	0.302844	1	2707	tags=67%, list=21%, signal=84%
GO_BENZENE_CONTAINING_COMPOUND_METABOLIC_PROCESS	GO_BENZENE_CONTAINING_COMPOUND_METABOLIC_PROCESS	Details ...	18	0.78585	1.57033	0.00764818	0.300826	1	1852	tags=72%, list=14%, signal=84%
GO_MICROBODY_LUMEN	GO_MICROBODY_LUMEN	Details ...	36	0.723756	1.57022	0.023166	0.298864	1	2080	tags=64%, list=16%, signal=76%
GO_OXIDOREDUCTASE_ACTIVITY_ACTING_ON_THE_ALDEHYDE_OR_OXO_GROUP_OF_DONORS	GO_OXIDOREDUCTASE_ACTIVITY_ACTING_ON_THE_ALDEHYDE_OR_OXO_GROUP_OF_DONORS	Details ...	39	0.674266	1.56887	0.0230326	0.299717	1	1403	tags=46%, list=11%, signal=52%
GO_VERY_LONG_CHAIN_FATTY_ACID_METABOLIC_PROCESS	GO_VERY_LONG_CHAIN_FATTY_ACID_METABOLIC_PROCESS	Details ...	21	0.676611	1.56726	0.0211538	0.301399	1	1093	tags=43%, list=8%, signal=47%
GO_DEACETYLASE_ACTIVITY	GO_DEACETYLASE_ACTIVITY	Details ...	44	0.422097	1.56407	0.0297619	0.307239	1	2842	tags=36%, list=22%, signal=46%
GO_FATTY_ACID_BETA_OXIDATION	GO_FATTY_ACID_BETA_OXIDATION	Details ...	42	0.667138	1.56405	0.0406977	0.305062	1	2707	tags=71%, list=21%, signal=90%
GO_LIPID_OXIDATION	GO_LIPID_OXIDATION	Details ...	58	0.655264	1.56403	0.0311891	0.302917	1	2707	tags=71%, list=21%, signal=89%
GO_ORGANELLE_ENVELOPE_LUMEN	GO_ORGANELLE_ENVELOPE_LUMEN	Details ...	64	0.422763	1.56205	0.0227273	0.305523	1	2613	tags=39%, list=20%, signal=49%
GO_PURINE_NUCLEOSIDE_BIOSYNTHETIC_PROCESS	GO_PURINE_NUCLEOSIDE_BIOSYNTHETIC_PROCESS	Details ...	74	0.408514	1.56111	0.0180361	0.305297	1	3394	tags=45%, list=26%, signal=60%
GO_MONOSACCHARIDE_METABOLIC_PROCESS	GO_MONOSACCHARIDE_METABOLIC_PROCESS	Details ...	162	0.485834	1.56047	0.00954198	0.30461	1	2085	tags=39%, list=16%, signal=46%
GO_ASPARTATE_FAMILY_AMINO_ACID_CATABOLIC_PROCESS	GO_ASPARTATE_FAMILY_AMINO_ACID_CATABOLIC_PROCESS	Details ...	15	0.759728	1.55894	0.0368932	0.306089	1	1264	tags=67%, list=10%, signal=74%
GO_POLYSACCHARIDE_CATABOLIC_PROCESS	GO_POLYSACCHARIDE_CATABOLIC_PROCESS	Details ...	22	0.590949	1.55884	0.017341	0.304173	1	746	tags=32%, list=6%, signal=34%
GO_SULFUR_COMPOUND_METABOLIC_PROCESS	GO_SULFUR_COMPOUND_METABOLIC_PROCESS	Details ...	271	0.457226	1.55369	0.00585938	0.31436	1	2438	tags=40%, list=19%, signal=48%
GO_PRIMARY_ALCOHOL_METABOLIC_PROCESS	GO_PRIMARY_ALCOHOL_METABOLIC_PROCESS	Details ...	36	0.6383	1.55193	0.030888	0.316429	1	2042	tags=53%, list=16%, signal=62%
GO_MONOSACCHARIDE_BIOSYNTHETIC_PROCESS	GO_MONOSACCHARIDE_BIOSYNTHETIC_PROCESS	Details ...	51	0.602074	1.548	0.0438095	0.324012	1	2085	tags=51%, list=16%, signal=60%
GO_TRANSFERASE_ACTIVITY_TRANSFERRING_ACYL_GROUPS_OTHER_THAN_AMINO_ACYL_GROUPS	GO_TRANSFERASE_ACTIVITY_TRANSFERRING_ACYL_GROUPS_OTHER_THAN_AMINO_ACYL_GROUPS	Details ...	117	0.437868	1.54763	0.0268199	0.322653	1	2133	tags=33%, list=16%, signal=39%
GO_ORGANIC_HYDROXY_COMPOUND_CATABOLIC_PROCESS	GO_ORGANIC_HYDROXY_COMPOUND_CATABOLIC_PROCESS	Details ...	59	0.548812	1.54684	0.0361905	0.322395	1	2056	tags=39%, list=16%, signal=46%
GO_PROTEIN_LOCALIZATION_TO_LYSOSOME	GO_PROTEIN_LOCALIZATION_TO_LYSOSOME	Details ...	15	0.598265	1.54641	0.0308642	0.321281	1	1830	tags=40%, list=14%, signal=46%
GO_FATTY_ACID_CATABOLIC_PROCESS	GO_FATTY_ACID_CATABOLIC_PROCESS	Details ...	58	0.679813	1.5441	0.0407767	0.324514	1	2707	tags=74%, list=21%, signal=93%
GO_GLUCAN_BIOSYNTHETIC_PROCESS	GO_GLUCAN_BIOSYNTHETIC_PROCESS	Details ...	21	0.577988	1.53544	0.0583942	0.344066	1	947	tags=29%, list=7%, signal=31%
GO_FATTY_ACYL_COA_BINDING	GO_FATTY_ACYL_COA_BINDING	Details ...	25	0.694936	1.53497	0.0350195	0.343026	1	1647	tags=52%, list=13%, signal=59%
GO_GLUTATHIONE_DERIVATIVE_METABOLIC_PROCESS	GO_GLUTATHIONE_DERIVATIVE_METABOLIC_PROCESS	Details ...	17	0.71443	1.53451	0.0276134	0.342041	1	2872	tags=82%, list=22%, signal=105%
GO_LIPID_CATABOLIC_PROCESS	GO_LIPID_CATABOLIC_PROCESS	Details ...	180	0.503475	1.53421	0.0307692	0.340488	1	2707	tags=48%, list=21%, signal=60%
GO_LIPOPROTEIN_METABOLIC_PROCESS	GO_LIPOPROTEIN_METABOLIC_PROCESS	Details ...	93	0.426994	1.53307	0.00761905	0.340969	1	2272	tags=33%, list=17%, signal=40%
GO_NUCLEOTIDE_EXCISION_REPAIR_DNA_DAMAGE_RECOGNITION	GO_NUCLEOTIDE_EXCISION_REPAIR_DNA_DAMAGE_RECOGNITION	Details ...	23	0.505633	1.53182	0.072407	0.341872	1	3569	tags=48%, list=27%, signal=66%
GO_REGULATION_OF_COFACTOR_METABOLIC_PROCESS	GO_REGULATION_OF_COFACTOR_METABOLIC_PROCESS	Details ...	46	0.516616	1.52785	0.0311284	0.34975	1	2653	tags=43%, list=20%, signal=54%
GO_N_ACYLTRANSFERASE_ACTIVITY	GO_N_ACYLTRANSFERASE_ACTIVITY	Details ...	54	0.431544	1.52576	0.0265152	0.352665	1	1399	tags=24%, list=11%, signal=27%
GO_MONOCARBOXYLIC_ACID_CATABOLIC_PROCESS	GO_MONOCARBOXYLIC_ACID_CATABOLIC_PROCESS	Details ...	77	0.675534	1.5254	0.0535373	0.351413	1	2707	tags=74%, list=21%, signal=93%
GO_SNAP_RECEPTOR_ACTIVITY	GO_SNAP_RECEPTOR_ACTIVITY	Details ...	31	0.496165	1.52539	0.0385396	0.349226	1	3509	tags=52%, list=27%, signal=70%
GO_QUINONE_METABOLIC_PROCESS	GO_QUINONE_METABOLIC_PROCESS	Details ...	25	0.689228	1.52375	0.0357143	0.351273	1	2370	tags=64%, list=18%, signal=78%
GO_DIOXYGENASE_ACTIVITY	GO_DIOXYGENASE_ACTIVITY	Details ...	50	0.509024	1.52331	0.0223124	0.3503	1	1856	tags=34%, list=14%, signal=39%
GO_CARBOHYDRATE_METABOLIC_PROCESS	GO_CARBOHYDRATE_METABOLIC_PROCESS	Details ...	486	0.382356	1.52326	0.0114068	0.348252	1	2095	tags=29%, list=16%, signal=33%
GO_PROTON_TRANSPORTING_TWO_SECTOR_ATPASE_COMPLEX	GO_PROTON_TRANSPORTING_TWO_SECTOR_ATPASE_COMPLEX	Details ...	39	0.458224	1.52115	0.10058	0.351472	1	3394	tags=54%, list=26%, signal=73%
GO_WIDE_PORE_CHANNEL_ACTIVITY	GO_WIDE_PORE_CHANNEL_ACTIVITY	Details ...	15	0.560829	1.51986	0.0524272	0.352731	1	1326	tags=27%, list=10%, signal=30%
GO_ACETYLTRANSFERASE_ACTIVITY	GO_ACETYLTRANSFERASE_ACTIVITY	Details ...	61	0.421665	1.5194	0.0249042	0.351726	1	1399	tags=26%, list=11%, signal=29%
GO_MACROMOLECULAR_COMPLEX_DISASSEMBLY	GO_MACROMOLECULAR_COMPLEX_DISASSEMBLY	Details ...	129	0.420691	1.51777	0.0506073	0.353775	1	3213	tags=42%, list=25%, signal=55%
GO_PROTEIN_TARGETING_TO_MITOCHONDRION	GO_PROTEIN_TARGETING_TO_MITOCHONDRION	Details ...	37	0.486308	1.51757	0.067623	0.352222	1	4390	tags=76%, list=34%, signal=114%
GO_STEROID_BIOSYNTHETIC_PROCESS	GO_STEROID_BIOSYNTHETIC_PROCESS	Details ...	100	0.553517	1.51611	0.0298805	0.35374	1	772	tags=28%, list=6%, signal=30%
GO_HYDROLASE_ACTIVITY_ACTING_ON_CARBON_NITROGEN_BUT_NOT_PEPTIDE_BONDS_IN_LINEAR_AMIDES	GO_HYDROLASE_ACTIVITY_ACTING_ON_CARBON_NITROGEN_BUT_NOT_PEPTIDE_BONDS_IN_LINEAR_AMIDES	Details ...	64	0.437299	1.51575	0.013834	0.352502	1	2413	tags=33%, list=19%, signal=40%
GO_TETRAPYRROLE_METABOLIC_PROCESS	GO_TETRAPYRROLE_METABOLIC_PROCESS	Details ...	49	0.505663	1.51268	0.0178926	0.358548	1	3065	tags=49%, list=24%, signal=64%
GO_HYDRO_LYASE_ACTIVITY	GO_HYDRO_LYASE_ACTIVITY	Details ...	41	0.555477	1.51177	0.021611	0.358919	1	2916	tags=56%, list=22%, signal=72%
GO_THIOLESTER_HYDROLASE_ACTIVITY	GO_THIOLESTER_HYDROLASE_ACTIVITY	Details ...	20	0.593764	1.51071	0.0584906	0.359537	1	1708	tags=40%, list=13%, signal=46%
GO_POSITIVE_REGULATION_OF_HISTONE_H3_K4_METHYLATION	GO_POSITIVE_REGULATION_OF_HISTONE_H3_K4_METHYLATION	Details ...	16	0.559249	1.51041	0.0803213	0.358288	1	1853	tags=38%, list=14%, signal=44%
GO_CELLULAR_MODIFIED_AMINO_ACID_METABOLIC_PROCESS	GO_CELLULAR_MODIFIED_AMINO_ACID_METABOLIC_PROCESS	Details ...	173	0.486877	1.51013	0.0172745	0.356989	1	2344	tags=43%, list=18%, signal=51%
GO_AMINO_ACID_BETAINE_METABOLIC_PROCESS	GO_AMINO_ACID_BETAINE_METABOLIC_PROCESS	Details ...	15	0.719385	1.5097	0.0451128	0.355999	1	2573	tags=80%, list=20%, signal=100%
GO_ACETYL_COA_METABOLIC_PROCESS	GO_ACETYL_COA_METABOLIC_PROCESS	Details ...	22	0.642805	1.50771	0.0487805	0.359224	1	3226	tags=77%, list=25%, signal=103%
GO_SULFUR_AMINO_ACID_METABOLIC_PROCESS	GO_SULFUR_AMINO_ACID_METABOLIC_PROCESS	Details ...	36	0.638487	1.50721	0.034749	0.358461	1	1750	tags=53%, list=13%, signal=61%
GO_OXIDOREDUCTASE_ACTIVITY_ACTING_ON_THE_ALDEHYDE_OR_OXO_GROUP_OF_DONORS_NAD_OR_NADP_AS_ACCEPTOR	GO_OXIDOREDUCTASE_ACTIVITY_ACTING_ON_THE_ALDEHYDE_OR_OXO_GROUP_OF_DONORS_NAD_OR_NADP_AS_ACCEPTOR	Details ...	30	0.63311	1.5062	0.0441459	0.359075	1	1230	tags=37%, list=9%, signal=40%
GO_ENDOPLASMIC_RETICULUM_ORGANIZATION	GO_ENDOPLASMIC_RETICULUM_ORGANIZATION	Details ...	24	0.482907	1.50597	0.073501	0.35772	1	2439	tags=38%, list=19%, signal=46%
GO_OXIDOREDUCTION_COENZYME_METABOLIC_PROCESS	GO_OXIDOREDUCTION_COENZYME_METABOLIC_PROCESS	Details ...	90	0.508152	1.50486	0.037037	0.358668	1	1770	tags=38%, list=14%, signal=43%
GO_OXIDOREDUCTASE_ACTIVITY_ACTING_ON_THE_CH_CH_GROUP_OF_DONORS_NAD_OR_NADP_AS_ACCEPTOR	GO_OXIDOREDUCTASE_ACTIVITY_ACTING_ON_THE_CH_CH_GROUP_OF_DONORS_NAD_OR_NADP_AS_ACCEPTOR	Details ...	20	0.675008	1.50452	0.0523364	0.357528	1	2559	tags=70%, list=20%, signal=87%
GO_POLYSACCHARIDE_BIOSYNTHETIC_PROCESS	GO_POLYSACCHARIDE_BIOSYNTHETIC_PROCESS	Details ...	33	0.477148	1.50362	0.046729	0.357851	1	947	tags=24%, list=7%, signal=26%
GO_TRANSFERASE_ACTIVITY_TRANSFERRING_ACYL_GROUPS	GO_TRANSFERASE_ACTIVITY_TRANSFERRING_ACYL_GROUPS	Details ...	138	0.416133	1.50161	0.0175781	0.361179	1	2393	tags=34%, list=18%, signal=41%
GO_CARBOXYLIC_ESTER_HYDROLASE_ACTIVITY	GO_CARBOXYLIC_ESTER_HYDROLASE_ACTIVITY	Details ...	87	0.482342	1.50134	0.0245747	0.359935	1	2868	tags=44%, list=22%, signal=56%
GO_RESPONSE_TO_PH	GO_RESPONSE_TO_PH	Details ...	37	0.514058	1.49994	0.0522388	0.3617	1	2284	tags=38%, list=18%, signal=46%
GO_TETRAPYRROLE_BIOSYNTHETIC_PROCESS	GO_TETRAPYRROLE_BIOSYNTHETIC_PROCESS	Details ...	21	0.579099	1.49934	0.0721248	0.361251	1	2916	tags=57%, list=22%, signal=73%
GO_HYDROGEN_TRANSPORT	GO_HYDROGEN_TRANSPORT	Details ...	101	0.32886	1.49902	0.0542636	0.360157	1	3394	tags=39%, list=26%, signal=52%
GO_PROTEIN_POLYUBIQUITINATION	GO_PROTEIN_POLYUBIQUITINATION	Details ...	182	0.371986	1.49868	0.0224949	0.359148	1	3316	tags=41%, list=25%, signal=54%
GO_HORMONE_BIOSYNTHETIC_PROCESS	GO_HORMONE_BIOSYNTHETIC_PROCESS	Details ...	44	0.544148	1.49586	0.0318091	0.364104	1	702	tags=23%, list=5%, signal=24%
GO_NEUTRAL_LIPID_BIOSYNTHETIC_PROCESS	GO_NEUTRAL_LIPID_BIOSYNTHETIC_PROCESS	Details ...	17	0.651842	1.49568	0.0433145	0.362744	1	1898	tags=53%, list=15%, signal=62%
GO_HEXOSE_METABOLIC_PROCESS	GO_HEXOSE_METABOLIC_PROCESS	Details ...	135	0.456197	1.4956	0.0228137	0.361072	1	2085	tags=36%, list=16%, signal=43%
GO_GTP_METABOLIC_PROCESS	GO_GTP_METABOLIC_PROCESS	Details ...	17	0.54859	1.49542	0.0513308	0.359649	1	3274	tags=41%, list=25%, signal=55%
GO_ANDROGEN_METABOLIC_PROCESS	GO_ANDROGEN_METABOLIC_PROCESS	Details ...	27	0.598514	1.49156	0.0294118	0.367533	1	1220	tags=37%, list=9%, signal=41%
GO_SULFUR_AMINO_ACID_BIOSYNTHETIC_PROCESS	GO_SULFUR_AMINO_ACID_BIOSYNTHETIC_PROCESS	Details ...	17	0.697909	1.49141	0.036965	0.366012	1	1578	tags=59%, list=12%, signal=67%
GO_PEPTIDYL_GLUTAMIC_ACID_MODIFICATION	GO_PEPTIDYL_GLUTAMIC_ACID_MODIFICATION	Details ...	18	0.620608	1.49001	0.0425532	0.367626	1	1774	tags=61%, list=14%, signal=71%
GO_RIBONUCLEOPROTEIN_COMPLEX_BINDING	GO_RIBONUCLEOPROTEIN_COMPLEX_BINDING	Details ...	66	0.421034	1.48897	0.0778947	0.368518	1	3220	tags=39%, list=25%, signal=52%
GO_ORGANOPHOSPHATE_CATABOLIC_PROCESS	GO_ORGANOPHOSPHATE_CATABOLIC_PROCESS	Details ...	85	0.402681	1.48478	0.0263158	0.377248	1	2873	tags=34%, list=22%, signal=43%
GO_ASPARTATE_FAMILY_AMINO_ACID_BIOSYNTHETIC_PROCESS	GO_ASPARTATE_FAMILY_AMINO_ACID_BIOSYNTHETIC_PROCESS	Details ...	18	0.60586	1.48364	0.0613027	0.378312	1	1578	tags=44%, list=12%, signal=50%
GO_FATTY_ACYL_COA_METABOLIC_PROCESS	GO_FATTY_ACYL_COA_METABOLIC_PROCESS	Details ...	32	0.594094	1.48242	0.049904	0.379732	1	3237	tags=59%, list=25%, signal=79%
GO_CARBOHYDRATE_BIOSYNTHETIC_PROCESS	GO_CARBOHYDRATE_BIOSYNTHETIC_PROCESS	Details ...	102	0.454256	1.48224	0.0492424	0.378313	1	1400	tags=30%, list=11%, signal=34%
GO_RESPONSE_TO_CADMIUM_ION	GO_RESPONSE_TO_CADMIUM_ION	Details ...	37	0.589282	1.48159	0.0662879	0.37814	1	2610	tags=51%, list=20%, signal=64%
GO_NEGATIVE_REGULATION_OF_OXIDATIVE_STRESS_INDUCED_INTRINSIC_APOPTOTIC_SIGNALING_PATHWAY	GO_NEGATIVE_REGULATION_OF_OXIDATIVE_STRESS_INDUCED_INTRINSIC_APOPTOTIC_SIGNALING_PATHWAY	Details ...	21	0.489412	1.47853	0.0476191	0.384176	1	2796	tags=38%, list=21%, signal=48%
GO_INTRINSIC_COMPONENT_OF_MITOCHONDRIAL_OUTER_MEMBRANE	GO_INTRINSIC_COMPONENT_OF_MITOCHONDRIAL_OUTER_MEMBRANE	Details ...	17	0.541621	1.47836	0.0589431	0.382649	1	4398	tags=59%, list=34%, signal=89%
GO_DRUG_TRANSPORT	GO_DRUG_TRANSPORT	Details ...	20	0.721527	1.4782	0.0278293	0.38128	1	2208	tags=70%, list=17%, signal=84%
GO_GOLGI_VESICLE_TRANSPORT	GO_GOLGI_VESICLE_TRANSPORT	Details ...	246	0.36902	1.4759	0.0258449	0.385243	1	3509	tags=43%, list=27%, signal=58%
GO_LOCALIZATION_WITHIN_MEMBRANE	GO_LOCALIZATION_WITHIN_MEMBRANE	Details ...	102	0.390368	1.4756	0.0174757	0.384083	1	2631	tags=39%, list=20%, signal=49%
GO_ORGANIC_HYDROXY_COMPOUND_TRANSMEMBRANE_TRANSPORTER_ACTIVITY	GO_ORGANIC_HYDROXY_COMPOUND_TRANSMEMBRANE_TRANSPORTER_ACTIVITY	Details ...	43	0.560419	1.47448	0.0514286	0.385089	1	265	tags=21%, list=2%, signal=21%
GO_NUCLEOSIDE_BISPHOSPHATE_METABOLIC_PROCESS	GO_NUCLEOSIDE_BISPHOSPHATE_METABOLIC_PROCESS	Details ...	29	0.546609	1.47377	0.0608519	0.385029	1	3014	tags=52%, list=23%, signal=67%
GO_INNATE_IMMUNE_RESPONSE_ACTIVATING_CELL_SURFACE_RECEPTOR_SIGNALING_PATHWAY	GO_INNATE_IMMUNE_RESPONSE_ACTIVATING_CELL_SURFACE_RECEPTOR_SIGNALING_PATHWAY	Details ...	95	0.385071	1.47304	0.0749507	0.384985	1	2961	tags=40%, list=23%, signal=51%
GO_DRUG_TRANSMEMBRANE_TRANSPORT	GO_DRUG_TRANSMEMBRANE_TRANSPORT	Details ...	16	0.761608	1.47282	0.035514	0.383719	1	617	tags=56%, list=5%, signal=59%
GO_TRNA_MODIFICATION	GO_TRNA_MODIFICATION	Details ...	36	0.429496	1.47216	0.0714286	0.38344	1	3547	tags=44%, list=27%, signal=61%
GO_PROLINE_RICH_REGION_BINDING	GO_PROLINE_RICH_REGION_BINDING	Details ...	17	0.586434	1.47123	0.0506823	0.384011	1	562	tags=24%, list=4%, signal=25%
GO_PROTEIN_LOCALIZATION_TO_VACUOLE	GO_PROTEIN_LOCALIZATION_TO_VACUOLE	Details ...	35	0.449739	1.4687	0.0536779	0.388718	1	2832	tags=43%, list=22%, signal=55%
GO_SOLUTE_PROTON_SYMPORTER_ACTIVITY	GO_SOLUTE_PROTON_SYMPORTER_ACTIVITY	Details ...	16	0.552499	1.46855	0.07393	0.387351	1	501	tags=31%, list=4%, signal=32%
GO_FLAVIN_ADENINE_DINUCLEOTIDE_BINDING	GO_FLAVIN_ADENINE_DINUCLEOTIDE_BINDING	Details ...	63	0.573626	1.4684	0.0694981	0.385926	1	3243	tags=63%, list=25%, signal=84%
GO_LIGASE_ACTIVITY_FORMING_CARBON_SULFUR_BONDS	GO_LIGASE_ACTIVITY_FORMING_CARBON_SULFUR_BONDS	Details ...	20	0.623796	1.46835	0.036	0.384247	1	1867	tags=50%, list=14%, signal=58%
GO_ALCOHOL_CATABOLIC_PROCESS	GO_ALCOHOL_CATABOLIC_PROCESS	Details ...	47	0.471636	1.46679	0.0552268	0.386593	1	2056	tags=32%, list=16%, signal=38%
GO_CELLULAR_HORMONE_METABOLIC_PROCESS	GO_CELLULAR_HORMONE_METABOLIC_PROCESS	Details ...	84	0.503463	1.46422	0.0357143	0.39132	1	1762	tags=36%, list=14%, signal=41%
GO_HYDROLASE_ACTIVITY_HYDROLYZING_O_GLYCOSYL_COMPOUNDS	GO_HYDROLASE_ACTIVITY_HYDROLYZING_O_GLYCOSYL_COMPOUNDS	Details ...	64	0.429687	1.46269	0.0473373	0.393336	1	1875	tags=33%, list=14%, signal=38%
GO_SULFUR_COMPOUND_BIOSYNTHETIC_PROCESS	GO_SULFUR_COMPOUND_BIOSYNTHETIC_PROCESS	Details ...	147	0.418887	1.46258	0.023622	0.391871	1	3065	tags=44%, list=24%, signal=56%
GO_CHAPERONE_BINDING	GO_CHAPERONE_BINDING	Details ...	69	0.455788	1.4611	0.0609037	0.393926	1	2299	tags=33%, list=18%, signal=40%
GO_OXIDOREDUCTASE_ACTIVITY_ACTING_ON_SINGLE_DONORS_WITH_INCORPORATION_OF_MOLECULAR_OXYGEN	GO_OXIDOREDUCTASE_ACTIVITY_ACTING_ON_SINGLE_DONORS_WITH_INCORPORATION_OF_MOLECULAR_OXYGEN	Details ...	20	0.638614	1.46106	0.0531496	0.392257	1	1856	tags=50%, list=14%, signal=58%
GO_LIGASE_ACTIVITY	GO_LIGASE_ACTIVITY	Details ...	257	0.353506	1.46096	0.0118343	0.390779	1	3285	tags=39%, list=25%, signal=52%
GO_INTRAMOLECULAR_OXIDOREDUCTASE_ACTIVITY	GO_INTRAMOLECULAR_OXIDOREDUCTASE_ACTIVITY	Details ...	37	0.481208	1.45998	0.0721248	0.391622	1	2352	tags=41%, list=18%, signal=49%
GO_COBALAMIN_METABOLIC_PROCESS	GO_COBALAMIN_METABOLIC_PROCESS	Details ...	18	0.498254	1.45945	0.0656064	0.391224	1	1750	tags=33%, list=13%, signal=38%
GO_MANNOSE_BINDING	GO_MANNOSE_BINDING	Details ...	17	0.559343	1.45937	0.0747126	0.389749	1	2273	tags=41%, list=17%, signal=50%
GO_LIPOSACCHARIDE_METABOLIC_PROCESS	GO_LIPOSACCHARIDE_METABOLIC_PROCESS	Details ...	81	0.382254	1.45883	0.0447471	0.389415	1	1982	tags=30%, list=15%, signal=35%
GO_PROTEIN_K63_LINKED_UBIQUITINATION	GO_PROTEIN_K63_LINKED_UBIQUITINATION	Details ...	28	0.432279	1.45849	0.0650888	0.388631	1	3168	tags=43%, list=24%, signal=56%
GO_ORGANIC_HYDROXY_COMPOUND_METABOLIC_PROCESS	GO_ORGANIC_HYDROXY_COMPOUND_METABOLIC_PROCESS	Details ...	389	0.428518	1.45846	0.0458015	0.387048	1	2154	tags=31%, list=17%, signal=36%
GO_LIPID_BIOSYNTHETIC_PROCESS	GO_LIPID_BIOSYNTHETIC_PROCESS	Details ...	401	0.379997	1.4555	0.0209924	0.392937	1	1986	tags=27%, list=15%, signal=31%
GO_AUTOPHAGOSOME_ORGANIZATION	GO_AUTOPHAGOSOME_ORGANIZATION	Details ...	30	0.466199	1.45472	0.0839844	0.393278	1	3348	tags=47%, list=26%, signal=63%
GO_HORMONE_METABOLIC_PROCESS	GO_HORMONE_METABOLIC_PROCESS	Details ...	140	0.454839	1.45355	0.0332031	0.394624	1	1784	tags=31%, list=14%, signal=35%
GO_HEME_METABOLIC_PROCESS	GO_HEME_METABOLIC_PROCESS	Details ...	24	0.569786	1.44581	0.0677291	0.413012	1	2916	tags=63%, list=22%, signal=80%
GO_HYDROLASE_ACTIVITY_ACTING_ON_CARBON_NITROGEN_BUT_NOT_PEPTIDE_BONDS	GO_HYDROLASE_ACTIVITY_ACTING_ON_CARBON_NITROGEN_BUT_NOT_PEPTIDE_BONDS	Details ...	108	0.384342	1.44521	0.0158103	0.412854	1	2432	tags=31%, list=19%, signal=37%
GO_PROTEIN_LIPID_COMPLEX	GO_PROTEIN_LIPID_COMPLEX	Details ...	34	0.639635	1.44433	0.0798479	0.413521	1	1692	tags=50%, list=13%, signal=57%
GO_REGULATION_OF_FATTY_ACID_BIOSYNTHETIC_PROCESS	GO_REGULATION_OF_FATTY_ACID_BIOSYNTHETIC_PROCESS	Details ...	30	0.563252	1.44411	0.0579151	0.412396	1	2610	tags=50%, list=20%, signal=62%
GO_RETINOL_METABOLIC_PROCESS	GO_RETINOL_METABOLIC_PROCESS	Details ...	21	0.544172	1.44344	0.0618956	0.412426	1	1632	tags=43%, list=13%, signal=49%
GO_RESPONSE_TO_XENOBIOTIC_STIMULUS	GO_RESPONSE_TO_XENOBIOTIC_STIMULUS	Details ...	88	0.584645	1.44157	0.0877863	0.415669	1	2344	tags=52%, list=18%, signal=63%
GO_LIPID_TRANSPORTER_ACTIVITY	GO_LIPID_TRANSPORTER_ACTIVITY	Details ...	75	0.500957	1.44054	0.0744275	0.416902	1	876	tags=24%, list=7%, signal=26%
GO_LIPID_HOMEOSTASIS	GO_LIPID_HOMEOSTASIS	Details ...	91	0.530383	1.4397	0.0647619	0.417413	1	3075	tags=54%, list=24%, signal=70%
GO_NECROPTOTIC_PROCESS	GO_NECROPTOTIC_PROCESS	Details ...	16	0.61031	1.43929	0.0898876	0.417013	1	2395	tags=44%, list=18%, signal=54%
GO_SUGAR_TRANSMEMBRANE_TRANSPORTER_ACTIVITY	GO_SUGAR_TRANSMEMBRANE_TRANSPORTER_ACTIVITY	Details ...	22	0.527993	1.43815	0.0554415	0.418298	1	501	tags=23%, list=4%, signal=24%
GO_PURINE_NUCLEOSIDE_MONOPHOSPHATE_BIOSYNTHETIC_PROCESS	GO_PURINE_NUCLEOSIDE_MONOPHOSPHATE_BIOSYNTHETIC_PROCESS	Details ...	53	0.37978	1.43776	0.0678643	0.417693	1	3394	tags=45%, list=26%, signal=61%
GO_MONOCARBOXYLIC_ACID_BIOSYNTHETIC_PROCESS	GO_MONOCARBOXYLIC_ACID_BIOSYNTHETIC_PROCESS	Details ...	133	0.470596	1.43752	0.0444874	0.416618	1	1884	tags=33%, list=14%, signal=38%
GO_QUATERNARY_AMMONIUM_GROUP_TRANSPORT	GO_QUATERNARY_AMMONIUM_GROUP_TRANSPORT	Details ...	15	0.680239	1.43732	0.0656064	0.415421	1	2208	tags=60%, list=17%, signal=72%
GO_POSITIVE_REGULATION_OF_TRIGLYCERIDE_METABOLIC_PROCESS	GO_POSITIVE_REGULATION_OF_TRIGLYCERIDE_METABOLIC_PROCESS	Details ...	15	0.660264	1.43697	0.0972222	0.414667	1	2546	tags=73%, list=20%, signal=91%
GO_WATER_SOLUBLE_VITAMIN_METABOLIC_PROCESS	GO_WATER_SOLUBLE_VITAMIN_METABOLIC_PROCESS	Details ...	73	0.455886	1.43681	0.0287908	0.413473	1	1893	tags=40%, list=15%, signal=46%
GO_REACTIVE_NITROGEN_SPECIES_METABOLIC_PROCESS	GO_REACTIVE_NITROGEN_SPECIES_METABOLIC_PROCESS	Details ...	17	0.635329	1.4363	0.0632411	0.413126	1	2099	tags=59%, list=16%, signal=70%
GO_POSITIVE_REGULATION_OF_LIGASE_ACTIVITY	GO_POSITIVE_REGULATION_OF_LIGASE_ACTIVITY	Details ...	91	0.452399	1.43628	0.105155	0.411536	1	3206	tags=47%, list=25%, signal=62%
GO_C21_STEROID_HORMONE_METABOLIC_PROCESS	GO_C21_STEROID_HORMONE_METABOLIC_PROCESS	Details ...	24	0.557086	1.43626	0.056338	0.40994	1	2154	tags=38%, list=17%, signal=45%
GO_VESICLE_ORGANIZATION	GO_VESICLE_ORGANIZATION	Details ...	197	0.368853	1.43625	0.044316	0.408322	1	2743	tags=36%, list=21%, signal=45%
GO_DISULFIDE_OXIDOREDUCTASE_ACTIVITY	GO_DISULFIDE_OXIDOREDUCTASE_ACTIVITY	Details ...	22	0.560324	1.43614	0.1	0.407041	1	3809	tags=68%, list=29%, signal=96%
GO_OUTER_MEMBRANE	GO_OUTER_MEMBRANE	Details ...	142	0.358677	1.43522	0.0228137	0.407775	1	2860	tags=33%, list=22%, signal=42%
GO_STEROID_METABOLIC_PROCESS	GO_STEROID_METABOLIC_PROCESS	Details ...	209	0.483221	1.43421	0.0610687	0.408849	1	2154	tags=36%, list=17%, signal=42%
GO_OLIGOSACCHARIDE_METABOLIC_PROCESS	GO_OLIGOSACCHARIDE_METABOLIC_PROCESS	Details ...	52	0.41878	1.43413	0.0530303	0.407426	1	2095	tags=35%, list=16%, signal=41%
GO_GLYCOSYL_COMPOUND_BIOSYNTHETIC_PROCESS	GO_GLYCOSYL_COMPOUND_BIOSYNTHETIC_PROCESS	Details ...	96	0.374286	1.4339	0.0509165	0.406413	1	3394	tags=40%, list=26%, signal=53%
GO_NUCLEOSIDE_TRIPHOSPHATE_BIOSYNTHETIC_PROCESS	GO_NUCLEOSIDE_TRIPHOSPHATE_BIOSYNTHETIC_PROCESS	Details ...	51	0.386737	1.43303	0.0889328	0.406916	1	3394	tags=43%, list=26%, signal=58%
GO_TRANSFERASE_ACTIVITY_TRANSFERRING_PENTOSYL_GROUPS	GO_TRANSFERASE_ACTIVITY_TRANSFERRING_PENTOSYL_GROUPS	Details ...	39	0.385637	1.42993	0.0372671	0.413112	1	2213	tags=31%, list=17%, signal=37%
GO_CELL_REDOX_HOMEOSTASIS	GO_CELL_REDOX_HOMEOSTASIS	Details ...	47	0.451844	1.42793	0.0990291	0.416822	1	2319	tags=36%, list=18%, signal=44%
GO_PEPTIDE_METABOLIC_PROCESS	GO_PEPTIDE_METABOLIC_PROCESS	Details ...	417	0.328132	1.42773	0.0526316	0.415657	1	2872	tags=32%, list=22%, signal=40%
GO_HYDROLASE_ACTIVITY_ACTING_ON_GLYCOSYL_BONDS	GO_HYDROLASE_ACTIVITY_ACTING_ON_GLYCOSYL_BONDS	Details ...	84	0.386969	1.4273	0.0527344	0.415213	1	1875	tags=30%, list=14%, signal=35%
GO_MONOVALENT_INORGANIC_CATION_HOMEOSTASIS	GO_MONOVALENT_INORGANIC_CATION_HOMEOSTASIS	Details ...	102	0.372484	1.42717	0.0388889	0.41392	1	2273	tags=26%, list=17%, signal=32%
GO_MEMBRANE_LIPID_METABOLIC_PROCESS	GO_MEMBRANE_LIPID_METABOLIC_PROCESS	Details ...	124	0.352492	1.42434	0.0334646	0.419524	1	1982	tags=28%, list=15%, signal=33%
GO_AUTOPHAGOSOME	GO_AUTOPHAGOSOME	Details ...	49	0.378594	1.42428	0.0660194	0.418118	1	2770	tags=33%, list=21%, signal=41%
GO_IRON_ION_BINDING	GO_IRON_ION_BINDING	Details ...	121	0.472626	1.42407	0.0497132	0.417055	1	1176	tags=27%, list=9%, signal=30%
GO_ORGANIC_CYCLIC_COMPOUND_CATABOLIC_PROCESS	GO_ORGANIC_CYCLIC_COMPOUND_CATABOLIC_PROCESS	Details ...	349	0.345015	1.42397	0.0359168	0.415751	1	1925	tags=23%, list=15%, signal=26%
GO_PROTEIN_HOMOTETRAMERIZATION	GO_PROTEIN_HOMOTETRAMERIZATION	Details ...	51	0.50022	1.42313	0.0711539	0.41633	1	1884	tags=37%, list=14%, signal=43%
GO_VITAMIN_METABOLIC_PROCESS	GO_VITAMIN_METABOLIC_PROCESS	Details ...	101	0.444575	1.42234	0.0253906	0.416729	1	1976	tags=37%, list=15%, signal=43%
GO_AMMONIUM_ION_METABOLIC_PROCESS	GO_AMMONIUM_ION_METABOLIC_PROCESS	Details ...	129	0.393011	1.41998	0.0391061	0.421279	1	2208	tags=31%, list=17%, signal=37%
GO_S_ADENOSYLMETHIONINE_DEPENDENT_METHYLTRANSFERASE_ACTIVITY	GO_S_ADENOSYLMETHIONINE_DEPENDENT_METHYLTRANSFERASE_ACTIVITY	Details ...	86	0.397024	1.41631	0.0669291	0.429368	1	2301	tags=26%, list=18%, signal=31%
GO_GLUTAMINE_FAMILY_AMINO_ACID_BIOSYNTHETIC_PROCESS	GO_GLUTAMINE_FAMILY_AMINO_ACID_BIOSYNTHETIC_PROCESS	Details ...	16	0.68197	1.41472	0.0481696	0.431846	1	1542	tags=50%, list=12%, signal=57%
GO_AP_TYPE_MEMBRANE_COAT_ADAPTOR_COMPLEX	GO_AP_TYPE_MEMBRANE_COAT_ADAPTOR_COMPLEX	Details ...	31	0.445352	1.41289	0.0932039	0.434916	1	2756	tags=35%, list=21%, signal=45%
GO_PROTEIN_DISULFIDE_OXIDOREDUCTASE_ACTIVITY	GO_PROTEIN_DISULFIDE_OXIDOREDUCTASE_ACTIVITY	Details ...	18	0.572734	1.41283	0.0972222	0.433489	1	3809	tags=72%, list=29%, signal=102%
GO_NUCLEOBASE_CONTAINING_SMALL_MOLECULE_INTERCONVERSION	GO_NUCLEOBASE_CONTAINING_SMALL_MOLECULE_INTERCONVERSION	Details ...	17	0.613746	1.41118	0.117764	0.436153	1	2266	tags=47%, list=17%, signal=57%
GO_ALDITOL_METABOLIC_PROCESS	GO_ALDITOL_METABOLIC_PROCESS	Details ...	15	0.64427	1.41061	0.0789474	0.436023	1	1871	tags=47%, list=14%, signal=54%
GO_HIGH_DENSITY_LIPOPROTEIN_PARTICLE	GO_HIGH_DENSITY_LIPOPROTEIN_PARTICLE	Details ...	22	0.703295	1.40994	0.11575	0.436085	1	2546	tags=68%, list=20%, signal=85%
GO_PTERIDINE_CONTAINING_COMPOUND_BIOSYNTHETIC_PROCESS	GO_PTERIDINE_CONTAINING_COMPOUND_BIOSYNTHETIC_PROCESS	Details ...	15	0.538698	1.40867	0.093254	0.437803	1	1290	tags=47%, list=10%, signal=52%
GO_GLYCOLIPID_BIOSYNTHETIC_PROCESS	GO_GLYCOLIPID_BIOSYNTHETIC_PROCESS	Details ...	42	0.397928	1.40854	0.059387	0.436538	1	2187	tags=33%, list=17%, signal=40%
GO_BILE_ACID_BIOSYNTHETIC_PROCESS	GO_BILE_ACID_BIOSYNTHETIC_PROCESS	Details ...	18	0.763918	1.40825	0.0700389	0.435654	1	1647	tags=67%, list=13%, signal=76%
GO_INDOLE_CONTAINING_COMPOUND_METABOLIC_PROCESS	GO_INDOLE_CONTAINING_COMPOUND_METABOLIC_PROCESS	Details ...	19	0.62857	1.40719	0.102362	0.436855	1	1852	tags=53%, list=14%, signal=61%
GO_PROTEIN_HOMOOLIGOMERIZATION	GO_PROTEIN_HOMOOLIGOMERIZATION	Details ...	185	0.374499	1.40675	0.0481696	0.436442	1	3110	tags=38%, list=24%, signal=49%
GO_TRIGLYCERIDE_RICH_LIPOPROTEIN_PARTICLE	GO_TRIGLYCERIDE_RICH_LIPOPROTEIN_PARTICLE	Details ...	16	0.650125	1.40613	0.0676983	0.436581	1	2546	tags=63%, list=20%, signal=78%
GO_PROTEIN_FOLDING	GO_PROTEIN_FOLDING	Details ...	168	0.390682	1.40608	0.0895238	0.435172	1	2765	tags=33%, list=21%, signal=42%
GO_PTERIDINE_CONTAINING_COMPOUND_METABOLIC_PROCESS	GO_PTERIDINE_CONTAINING_COMPOUND_METABOLIC_PROCESS	Details ...	31	0.547954	1.40504	0.0909091	0.436183	1	1290	tags=45%, list=10%, signal=50%
GO_GLUTAMINE_FAMILY_AMINO_ACID_CATABOLIC_PROCESS	GO_GLUTAMINE_FAMILY_AMINO_ACID_CATABOLIC_PROCESS	Details ...	23	0.602049	1.40418	0.0803059	0.436867	1	1110	tags=43%, list=9%, signal=47%
GO_2_OXOGLUTARATE_METABOLIC_PROCESS	GO_2_OXOGLUTARATE_METABOLIC_PROCESS	Details ...	15	0.598544	1.4032	0.134387	0.437783	1	3127	tags=60%, list=24%, signal=79%
GO_STEROL_HOMEOSTASIS	GO_STEROL_HOMEOSTASIS	Details ...	49	0.516768	1.40247	0.0737864	0.438118	1	3061	tags=51%, list=23%, signal=66%
GO_REGULATION_OF_PROTEIN_UBIQUITINATION_INVOLVED_IN_UBIQUITIN_DEPENDENT_PROTEIN_CATABOLIC_PROCESS	GO_REGULATION_OF_PROTEIN_UBIQUITINATION_INVOLVED_IN_UBIQUITIN_DEPENDENT_PROTEIN_CATABOLIC_PROCESS	Details ...	90	0.385993	1.40223	0.118474	0.437162	1	2974	tags=38%, list=23%, signal=49%
GO_PORPHYRIN_CONTAINING_COMPOUND_METABOLIC_PROCESS	GO_PORPHYRIN_CONTAINING_COMPOUND_METABOLIC_PROCESS	Details ...	31	0.544204	1.39961	0.108481	0.442446	1	2916	tags=55%, list=22%, signal=70%
GO_AROMATIC_AMINO_ACID_FAMILY_METABOLIC_PROCESS	GO_AROMATIC_AMINO_ACID_FAMILY_METABOLIC_PROCESS	Details ...	20	0.715012	1.39939	0.107843	0.441493	1	1852	tags=70%, list=14%, signal=81%
GO_NADP_BINDING	GO_NADP_BINDING	Details ...	41	0.511317	1.39878	0.0788462	0.441512	1	2370	tags=41%, list=18%, signal=51%
GO_POSITIVE_REGULATION_OF_ORGANIC_ACID_TRANSPORT	GO_POSITIVE_REGULATION_OF_ORGANIC_ACID_TRANSPORT	Details ...	28	0.50596	1.39673	0.0640777	0.445404	1	1341	tags=25%, list=10%, signal=28%
GO_URONIC_ACID_METABOLIC_PROCESS	GO_URONIC_ACID_METABOLIC_PROCESS	Details ...	17	0.708988	1.39612	0.112381	0.445482	1	2340	tags=71%, list=18%, signal=86%
GO_REGULATION_OF_OXIDATIVE_STRESS_INDUCED_INTRINSIC_APOPTOTIC_SIGNALING_PATHWAY	GO_REGULATION_OF_OXIDATIVE_STRESS_INDUCED_INTRINSIC_APOPTOTIC_SIGNALING_PATHWAY	Details ...	28	0.413485	1.39526	0.0728347	0.446161	1	2796	tags=36%, list=21%, signal=45%
GO_PROTEIN_REFOLDING	GO_PROTEIN_REFOLDING	Details ...	20	0.521083	1.39522	0.133581	0.444718	1	4219	tags=60%, list=32%, signal=89%
GO_FLAVONOID_METABOLIC_PROCESS	GO_FLAVONOID_METABOLIC_PROCESS	Details ...	18	0.70305	1.3952	0.0972763	0.443278	1	2340	tags=72%, list=18%, signal=88%
GO_GLUCOSE_METABOLIC_PROCESS	GO_GLUCOSE_METABOLIC_PROCESS	Details ...	103	0.448635	1.39459	0.0759013	0.443375	1	2085	tags=36%, list=16%, signal=42%
GO_ORGANOPHOSPHATE_BIOSYNTHETIC_PROCESS	GO_ORGANOPHOSPHATE_BIOSYNTHETIC_PROCESS	Details ...	342	0.315638	1.39404	0.00782779	0.4432	1	2234	tags=26%, list=17%, signal=31%
GO_PYRUVATE_METABOLIC_PROCESS	GO_PYRUVATE_METABOLIC_PROCESS	Details ...	61	0.498621	1.39396	0.0772201	0.441896	1	1513	tags=36%, list=12%, signal=41%
GO_LEUKOTRIENE_METABOLIC_PROCESS	GO_LEUKOTRIENE_METABOLIC_PROCESS	Details ...	23	0.509214	1.39335	0.0947776	0.442117	1	546	tags=22%, list=4%, signal=23%
GO_PROTEIN_TRANSPORTER_ACTIVITY	GO_PROTEIN_TRANSPORTER_ACTIVITY	Details ...	78	0.39298	1.3929	0.0788955	0.441756	1	3572	tags=45%, list=27%, signal=61%
GO_MACROMOLECULE_DEACYLATION	GO_MACROMOLECULE_DEACYLATION	Details ...	52	0.352055	1.39289	0.0843373	0.440339	1	2664	tags=35%, list=20%, signal=43%
GO_PLATELET_DENSE_GRANULE	GO_PLATELET_DENSE_GRANULE	Details ...	20	0.610228	1.39246	0.091954	0.439979	1	3457	tags=65%, list=27%, signal=88%
GO_TRANSCRIPTION_COUPLED_NUCLEOTIDE_EXCISION_REPAIR	GO_TRANSCRIPTION_COUPLED_NUCLEOTIDE_EXCISION_REPAIR	Details ...	68	0.446213	1.39171	0.125761	0.440492	1	2147	tags=35%, list=16%, signal=42%
GO_MONOSACCHARIDE_CATABOLIC_PROCESS	GO_MONOSACCHARIDE_CATABOLIC_PROCESS	Details ...	53	0.48926	1.39162	0.0764818	0.439267	1	1028	tags=32%, list=8%, signal=35%
GO_INTRA_GOLGI_VESICLE_MEDIATED_TRANSPORT	GO_INTRA_GOLGI_VESICLE_MEDIATED_TRANSPORT	Details ...	29	0.412821	1.39133	0.120482	0.438639	1	3093	tags=55%, list=24%, signal=72%
GO_ERROR_PRONE_TRANSLESION_SYNTHESIS	GO_ERROR_PRONE_TRANSLESION_SYNTHESIS	Details ...	17	0.650033	1.39064	0.161943	0.438998	1	2817	tags=59%, list=22%, signal=75%
GO_PROTEIN_N_LINKED_GLYCOSYLATION	GO_PROTEIN_N_LINKED_GLYCOSYLATION	Details ...	58	0.418407	1.38983	0.100746	0.439938	1	2095	tags=33%, list=16%, signal=39%
GO_MONOCARBOXYLIC_ACID_TRANSMEMBRANE_TRANSPORTER_ACTIVITY	GO_MONOCARBOXYLIC_ACID_TRANSMEMBRANE_TRANSPORTER_ACTIVITY	Details ...	32	0.586533	1.38914	0.0839695	0.440406	1	265	tags=25%, list=2%, signal=25%
GO_MEMBRANE_PROTEIN_PROTEOLYSIS	GO_MEMBRANE_PROTEIN_PROTEOLYSIS	Details ...	27	0.488146	1.38876	0.126437	0.440014	1	3645	tags=52%, list=28%, signal=72%
GO_ERAD_PATHWAY	GO_ERAD_PATHWAY	Details ...	51	0.407726	1.38849	0.120388	0.439334	1	3417	tags=47%, list=26%, signal=64%
GO_AUTOPHAGOSOME_MEMBRANE	GO_AUTOPHAGOSOME_MEMBRANE	Details ...	18	0.486374	1.38842	0.117534	0.438135	1	2770	tags=39%, list=21%, signal=49%
GO_REGULATION_OF_AMINO_ACID_TRANSPORT	GO_REGULATION_OF_AMINO_ACID_TRANSPORT	Details ...	24	0.481642	1.3881	0.0916179	0.43751	1	538	tags=17%, list=4%, signal=17%
GO_RIBOSOME_BINDING	GO_RIBOSOME_BINDING	Details ...	28	0.427276	1.38765	0.109015	0.437318	1	4023	tags=54%, list=31%, signal=77%
GO_4_IRON_4_SULFUR_CLUSTER_BINDING	GO_4_IRON_4_SULFUR_CLUSTER_BINDING	Details ...	34	0.469589	1.38612	0.10978	0.439802	1	2479	tags=47%, list=19%, signal=58%
GO_DRUG_METABOLIC_PROCESS	GO_DRUG_METABOLIC_PROCESS	Details ...	33	0.67054	1.38569	0.119231	0.439522	1	1590	tags=48%, list=12%, signal=55%
GO_REGULATION_OF_LIGASE_ACTIVITY	GO_REGULATION_OF_LIGASE_ACTIVITY	Details ...	107	0.418057	1.38542	0.121649	0.438785	1	3206	tags=44%, list=25%, signal=58%
GO_POLYOL_CATABOLIC_PROCESS	GO_POLYOL_CATABOLIC_PROCESS	Details ...	15	0.453715	1.38255	0.0993789	0.444611	1	2410	tags=33%, list=18%, signal=41%
GO_RESPONSE_TO_ACIDIC_PH	GO_RESPONSE_TO_ACIDIC_PH	Details ...	20	0.47716	1.38204	0.0827206	0.444404	1	2284	tags=35%, list=18%, signal=42%
GO_NAD_ADP_RIBOSYLTRANSFERASE_ACTIVITY	GO_NAD_ADP_RIBOSYLTRANSFERASE_ACTIVITY	Details ...	21	0.402576	1.38057	0.0969697	0.446767	1	2213	tags=33%, list=17%, signal=40%
GO_NEUTRAL_LIPID_METABOLIC_PROCESS	GO_NEUTRAL_LIPID_METABOLIC_PROCESS	Details ...	62	0.502632	1.37907	0.0982659	0.449207	1	2322	tags=45%, list=18%, signal=55%
GO_ORGANELLE_MEMBRANE_FUSION	GO_ORGANELLE_MEMBRANE_FUSION	Details ...	60	0.387825	1.37638	0.0865191	0.454869	1	3509	tags=47%, list=27%, signal=64%
GO_CELLULAR_RESPONSE_TO_PH	GO_CELLULAR_RESPONSE_TO_PH	Details ...	15	0.550781	1.37606	0.126437	0.454276	1	2284	tags=47%, list=18%, signal=57%
GO_EPOXYGENASE_P450_PATHWAY	GO_EPOXYGENASE_P450_PATHWAY	Details ...	16	0.770672	1.37575	0.114398	0.453676	1	628	tags=56%, list=5%, signal=59%
GO_LIPID_LOCALIZATION	GO_LIPID_LOCALIZATION	Details ...	199	0.415227	1.37534	0.086629	0.453368	1	2364	tags=33%, list=18%, signal=39%
GO_RESPONSE_TO_STARVATION	GO_RESPONSE_TO_STARVATION	Details ...	124	0.383311	1.3745	0.0433071	0.454096	1	2845	tags=38%, list=22%, signal=48%
GO_FATTY_ACID_BETA_OXIDATION_USING_ACYL_COA_DEHYDROGENASE	GO_FATTY_ACID_BETA_OXIDATION_USING_ACYL_COA_DEHYDROGENASE	Details ...	16	0.712856	1.37448	0.128257	0.452741	1	1295	tags=56%, list=10%, signal=62%
GO_MODULATION_BY_HOST_OF_VIRAL_PROCESS	GO_MODULATION_BY_HOST_OF_VIRAL_PROCESS	Details ...	15	0.499919	1.37401	0.121807	0.452521	1	2690	tags=40%, list=21%, signal=50%
GO_HEME_BIOSYNTHETIC_PROCESS	GO_HEME_BIOSYNTHETIC_PROCESS	Details ...	16	0.536438	1.374	0.123552	0.451179	1	2916	tags=56%, list=22%, signal=72%
GO_TRNA_PROCESSING	GO_TRNA_PROCESSING	Details ...	75	0.372496	1.3738	0.138554	0.450307	1	3580	tags=43%, list=27%, signal=58%
GO_PROTEIN_OLIGOMERIZATION	GO_PROTEIN_OLIGOMERIZATION	Details ...	342	0.325777	1.372	0.0275049	0.453361	1	3110	tags=35%, list=24%, signal=44%
GO_HYDROGEN_ION_TRANSMEMBRANE_TRANSPORT	GO_HYDROGEN_ION_TRANSMEMBRANE_TRANSPORT	Details ...	78	0.311023	1.37178	0.14751	0.452561	1	3394	tags=40%, list=26%, signal=53%
GO_IRE1_MEDIATED_UNFOLDED_PROTEIN_RESPONSE	GO_IRE1_MEDIATED_UNFOLDED_PROTEIN_RESPONSE	Details ...	53	0.439559	1.37164	0.164356	0.451547	1	2758	tags=40%, list=21%, signal=50%
GO_VACUOLAR_TRANSPORT	GO_VACUOLAR_TRANSPORT	Details ...	175	0.322749	1.37161	0.0761719	0.450295	1	2679	tags=30%, list=21%, signal=37%
GO_SIGNAL_SEQUENCE_BINDING	GO_SIGNAL_SEQUENCE_BINDING	Details ...	35	0.435665	1.3708	0.126923	0.451059	1	3617	tags=49%, list=28%, signal=67%
GO_INTRINSIC_COMPONENT_OF_ORGANELLE_MEMBRANE	GO_INTRINSIC_COMPONENT_OF_ORGANELLE_MEMBRANE	Details ...	188	0.348578	1.37038	0.0828516	0.450677	1	2597	tags=31%, list=20%, signal=38%
GO_ADP_METABOLIC_PROCESS	GO_ADP_METABOLIC_PROCESS	Details ...	42	0.5046	1.37009	0.101961	0.450071	1	1513	tags=38%, list=12%, signal=43%
GO_NUCLEOTIDE_EXCISION_REPAIR_DNA_GAP_FILLING	GO_NUCLEOTIDE_EXCISION_REPAIR_DNA_GAP_FILLING	Details ...	23	0.574301	1.3698	0.156	0.449467	1	1995	tags=43%, list=15%, signal=51%
GO_BILE_ACID_AND_BILE_SALT_TRANSPORT	GO_BILE_ACID_AND_BILE_SALT_TRANSPORT	Details ...	25	0.637635	1.36932	0.120301	0.449302	1	265	tags=36%, list=2%, signal=37%
GO_NUCLEOTIDE_SUGAR_METABOLIC_PROCESS	GO_NUCLEOTIDE_SUGAR_METABOLIC_PROCESS	Details ...	28	0.465224	1.36642	0.0955166	0.455381	1	2774	tags=46%, list=21%, signal=59%
GO_CIS_GOLGI_NETWORK	GO_CIS_GOLGI_NETWORK	Details ...	31	0.467543	1.36628	0.11597	0.454434	1	2780	tags=45%, list=21%, signal=57%
GO_RESPONSE_TO_ISCHEMIA	GO_RESPONSE_TO_ISCHEMIA	Details ...	21	0.532624	1.36604	0.0865191	0.453692	1	2653	tags=43%, list=20%, signal=54%
GO_BILE_ACID_METABOLIC_PROCESS	GO_BILE_ACID_METABOLIC_PROCESS	Details ...	31	0.645923	1.36527	0.119141	0.454352	1	2154	tags=55%, list=17%, signal=66%
GO_OXIDOREDUCTASE_ACTIVITY_ACTING_ON_PAIRED_DONORS_WITH_INCORPORATION_OR_REDUCTION_OF_MOLECULAR_OXYGEN	GO_OXIDOREDUCTASE_ACTIVITY_ACTING_ON_PAIRED_DONORS_WITH_INCORPORATION_OR_REDUCTION_OF_MOLECULAR_OXYGEN	Details ...	110	0.47369	1.36482	0.0736434	0.454169	1	2154	tags=36%, list=17%, signal=43%
GO_RETROGRADE_TRANSPORT_ENDOSOME_TO_GOLGI	GO_RETROGRADE_TRANSPORT_ENDOSOME_TO_GOLGI	Details ...	47	0.367006	1.36457	0.113281	0.453534	1	3553	tags=49%, list=27%, signal=67%
GO_STEROL_TRANSPORT	GO_STEROL_TRANSPORT	Details ...	44	0.45468	1.36196	0.101365	0.458871	1	2154	tags=36%, list=17%, signal=43%
GO_RESPONSE_TO_LITHIUM_ION	GO_RESPONSE_TO_LITHIUM_ION	Details ...	26	0.479137	1.36137	0.0750916	0.459053	1	2299	tags=42%, list=18%, signal=51%
GO_ORGANIC_HYDROXY_COMPOUND_TRANSPORT	GO_ORGANIC_HYDROXY_COMPOUND_TRANSPORT	Details ...	124	0.418634	1.36136	0.105166	0.457765	1	2208	tags=31%, list=17%, signal=37%
GO_STEROID_DEHYDROGENASE_ACTIVITY	GO_STEROID_DEHYDROGENASE_ACTIVITY	Details ...	23	0.608069	1.3612	0.118712	0.456818	1	1385	tags=39%, list=11%, signal=44%
GO_VITAMIN_TRANSPORT	GO_VITAMIN_TRANSPORT	Details ...	29	0.470419	1.36103	0.0763052	0.455932	1	1714	tags=31%, list=13%, signal=36%
GO_REGULATION_OF_ANDROGEN_RECEPTOR_SIGNALING_PATHWAY	GO_REGULATION_OF_ANDROGEN_RECEPTOR_SIGNALING_PATHWAY	Details ...	21	0.427175	1.36049	0.112266	0.456115	1	447	tags=14%, list=3%, signal=15%
GO_POSITIVE_REGULATION_OF_CATABOLIC_PROCESS	GO_POSITIVE_REGULATION_OF_CATABOLIC_PROCESS	Details ...	325	0.311288	1.36046	0.040619	0.45491	1	2974	tags=35%, list=23%, signal=44%
GO_LONG_CHAIN_FATTY_ACID_METABOLIC_PROCESS	GO_LONG_CHAIN_FATTY_ACID_METABOLIC_PROCESS	Details ...	75	0.500489	1.36042	0.103647	0.45372	1	1760	tags=36%, list=14%, signal=41%
GO_ALDEHYDE_DEHYDROGENASE_NAD_ACTIVITY	GO_ALDEHYDE_DEHYDROGENASE_NAD_ACTIVITY	Details ...	17	0.649899	1.36027	0.125237	0.452853	1	993	tags=35%, list=8%, signal=38%
GO_RIBONUCLEOSIDE_DIPHOSPHATE_METABOLIC_PROCESS	GO_RIBONUCLEOSIDE_DIPHOSPHATE_METABOLIC_PROCESS	Details ...	55	0.444875	1.35978	0.107004	0.452876	1	1513	tags=29%, list=12%, signal=33%
GO_PROTEIN_LOCALIZATION_TO_MITOCHONDRION	GO_PROTEIN_LOCALIZATION_TO_MITOCHONDRION	Details ...	51	0.388181	1.35811	0.126984	0.455806	1	4390	tags=65%, list=34%, signal=97%
GO_POSITIVE_REGULATION_OF_ANION_TRANSPORT	GO_POSITIVE_REGULATION_OF_ANION_TRANSPORT	Details ...	53	0.409644	1.35811	0.0973783	0.454543	1	1490	tags=21%, list=11%, signal=23%
GO_REGULATION_OF_PROTEIN_ACTIVATION_CASCADE	GO_REGULATION_OF_PROTEIN_ACTIVATION_CASCADE	Details ...	33	0.611261	1.35779	0.138889	0.454073	1	1923	tags=42%, list=15%, signal=50%
GO_ALCOHOL_METABOLIC_PROCESS	GO_ALCOHOL_METABOLIC_PROCESS	Details ...	269	0.386193	1.35717	0.0687023	0.454398	1	2056	tags=28%, list=16%, signal=32%
GO_AMMONIUM_TRANSMEMBRANE_TRANSPORT	GO_AMMONIUM_TRANSMEMBRANE_TRANSPORT	Details ...	22	0.558636	1.35444	0.0722656	0.460087	1	2208	tags=41%, list=17%, signal=49%
GO_METHYLATION	GO_METHYLATION	Details ...	174	0.329543	1.35232	0.0691057	0.464096	1	2305	tags=24%, list=18%, signal=29%
GO_VESICLE_LOCALIZATION	GO_VESICLE_LOCALIZATION	Details ...	166	0.340389	1.35185	0.0587084	0.464015	1	2631	tags=34%, list=20%, signal=42%
GO_CELLULAR_RESPONSE_TO_LITHIUM_ION	GO_CELLULAR_RESPONSE_TO_LITHIUM_ION	Details ...	16	0.52553	1.35072	0.0962264	0.465649	1	2299	tags=56%, list=18%, signal=68%
GO_REGULATION_OF_STEROID_METABOLIC_PROCESS	GO_REGULATION_OF_STEROID_METABOLIC_PROCESS	Details ...	60	0.454018	1.34994	0.08413	0.466321	1	2213	tags=33%, list=17%, signal=40%
GO_CELLULAR_RESPONSE_TO_TOPOLOGICALLY_INCORRECT_PROTEIN	GO_CELLULAR_RESPONSE_TO_TOPOLOGICALLY_INCORRECT_PROTEIN	Details ...	108	0.37679	1.34945	0.126195	0.466182	1	2796	tags=37%, list=21%, signal=47%
GO_PROTEIN_K48_LINKED_UBIQUITINATION	GO_PROTEIN_K48_LINKED_UBIQUITINATION	Details ...	33	0.428338	1.34939	0.116935	0.46504	1	3113	tags=52%, list=24%, signal=68%
GO_OXIDOREDUCTASE_ACTIVITY_ACTING_ON_PAIRED_DONORS_WITH_INCORPORATION_OR_REDUCTION_OF_MOLECULAR_OXYGEN_NAD_P_H_AS_ONE_DONOR_AND_INCORPORATION_OF_ONE_ATOM_OF_OXYGEN	GO_OXIDOREDUCTASE_ACTIVITY_ACTING_ON_PAIRED_DONORS_WITH_INCORPORATION_OR_REDUCTION_OF_MOLECULAR_OXYGEN_NAD_P_H_AS_ONE_DONOR_AND_INCORPORATION_OF_ONE_ATOM_OF_OXYGEN	Details ...	34	0.602734	1.34907	0.126654	0.464579	1	623	tags=32%, list=5%, signal=34%
GO_COFACTOR_CATABOLIC_PROCESS	GO_COFACTOR_CATABOLIC_PROCESS	Details ...	15	0.643239	1.34746	0.130693	0.46742	1	1840	tags=47%, list=14%, signal=54%
GO_PHOSPHATIDYLINOSITOL_4_PHOSPHATE_BINDING	GO_PHOSPHATIDYLINOSITOL_4_PHOSPHATE_BINDING	Details ...	15	0.516707	1.34707	0.153551	0.467137	1	3345	tags=53%, list=26%, signal=72%
GO_MONOOXYGENASE_ACTIVITY	GO_MONOOXYGENASE_ACTIVITY	Details ...	75	0.524061	1.34697	0.101923	0.46612	1	702	tags=28%, list=5%, signal=29%
GO_NUCLEOSIDE_DIPHOSPHATE_METABOLIC_PROCESS	GO_NUCLEOSIDE_DIPHOSPHATE_METABOLIC_PROCESS	Details ...	67	0.418116	1.34618	0.101961	0.466926	1	1513	tags=25%, list=12%, signal=29%
GO_OXIDOREDUCTASE_ACTIVITY_ACTING_ON_A_SULFUR_GROUP_OF_DONORS	GO_OXIDOREDUCTASE_ACTIVITY_ACTING_ON_A_SULFUR_GROUP_OF_DONORS	Details ...	34	0.481386	1.34046	0.120155	0.480216	1	2266	tags=41%, list=17%, signal=50%
GO_REGULATION_OF_CHOLESTEROL_METABOLIC_PROCESS	GO_REGULATION_OF_CHOLESTEROL_METABOLIC_PROCESS	Details ...	16	0.600456	1.33891	0.157895	0.483034	1	3485	tags=69%, list=27%, signal=94%
GO_GLUTAMATE_METABOLIC_PROCESS	GO_GLUTAMATE_METABOLIC_PROCESS	Details ...	24	0.587979	1.33716	0.11575	0.486323	1	1633	tags=50%, list=13%, signal=57%
GO_ORGANIC_HYDROXY_COMPOUND_BIOSYNTHETIC_PROCESS	GO_ORGANIC_HYDROXY_COMPOUND_BIOSYNTHETIC_PROCESS	Details ...	145	0.412604	1.33667	0.106589	0.486273	1	2049	tags=32%, list=16%, signal=37%
GO_POSITIVE_REGULATION_OF_STEROID_METABOLIC_PROCESS	GO_POSITIVE_REGULATION_OF_STEROID_METABOLIC_PROCESS	Details ...	21	0.495936	1.33667	0.128459	0.484987	1	2056	tags=38%, list=16%, signal=45%
GO_ISOPRENOID_METABOLIC_PROCESS	GO_ISOPRENOID_METABOLIC_PROCESS	Details ...	101	0.420404	1.33526	0.0961924	0.487362	1	2441	tags=36%, list=19%, signal=44%
GO_DNA_REPAIR_COMPLEX	GO_DNA_REPAIR_COMPLEX	Details ...	31	0.479957	1.33389	0.161417	0.489752	1	2475	tags=42%, list=19%, signal=52%
GO_MONOSACCHARIDE_BINDING	GO_MONOSACCHARIDE_BINDING	Details ...	63	0.436839	1.33269	0.0758755	0.491579	1	2293	tags=35%, list=18%, signal=42%
GO_OXIDOREDUCTASE_ACTIVITY_ACTING_ON_PAIRED_DONORS_WITH_INCORPORATION_OR_REDUCTION_OF_MOLECULAR_OXYGEN_REDUCED_FLAVIN_OR_FLAVOPROTEIN_AS_ONE_DONOR_AND_INCORPORATION_OF_ONE_ATOM_OF_OXYGEN	GO_OXIDOREDUCTASE_ACTIVITY_ACTING_ON_PAIRED_DONORS_WITH_INCORPORATION_OR_REDUCTION_OF_MOLECULAR_OXYGEN_REDUCED_FLAVIN_OR_FLAVOPROTEIN_AS_ONE_DONOR_AND_INCORPORATION_OF_ONE_ATOM_OF_OXYGEN	Details ...	20	0.616741	1.33167	0.170297	0.492949	1	684	tags=35%, list=5%, signal=37%
GO_ATPASE_ACTIVITY_COUPLED_TO_MOVEMENT_OF_SUBSTANCES	GO_ATPASE_ACTIVITY_COUPLED_TO_MOVEMENT_OF_SUBSTANCES	Details ...	103	0.359687	1.3315	0.0684411	0.492039	1	2184	tags=27%, list=17%, signal=32%
GO_ER_ASSOCIATED_UBIQUITIN_DEPENDENT_PROTEIN_CATABOLIC_PROCESS	GO_ER_ASSOCIATED_UBIQUITIN_DEPENDENT_PROTEIN_CATABOLIC_PROCESS	Details ...	43	0.420724	1.33128	0.16537	0.491288	1	3417	tags=49%, list=26%, signal=66%
GO_RESPONSE_TO_ENDOPLASMIC_RETICULUM_STRESS	GO_RESPONSE_TO_ENDOPLASMIC_RETICULUM_STRESS	Details ...	183	0.342923	1.32831	0.115768	0.497619	1	3665	tags=44%, list=28%, signal=61%
GO_PROTEIN_CATABOLIC_PROCESS	GO_PROTEIN_CATABOLIC_PROCESS	Details ...	409	0.317426	1.32733	0.0741483	0.499059	1	3664	tags=41%, list=28%, signal=55%
GO_REGULATION_OF_RNA_STABILITY	GO_REGULATION_OF_RNA_STABILITY	Details ...	116	0.342791	1.32558	0.144309	0.502466	1	3316	tags=40%, list=25%, signal=53%
GO_ACYLGLYCEROL_HOMEOSTASIS	GO_ACYLGLYCEROL_HOMEOSTASIS	Details ...	22	0.605234	1.32557	0.15619	0.50118	1	3268	tags=68%, list=25%, signal=91%
GO_REGULATION_OF_FATTY_ACID_METABOLIC_PROCESS	GO_REGULATION_OF_FATTY_ACID_METABOLIC_PROCESS	Details ...	69	0.453497	1.32544	0.100394	0.50022	1	3036	tags=49%, list=23%, signal=64%
GO_UNSATURATED_FATTY_ACID_METABOLIC_PROCESS	GO_UNSATURATED_FATTY_ACID_METABOLIC_PROCESS	Details ...	86	0.443237	1.32515	0.107004	0.499683	1	1760	tags=30%, list=14%, signal=35%
GO_NUCLEOTIDE_PHOSPHORYLATION	GO_NUCLEOTIDE_PHOSPHORYLATION	Details ...	51	0.457364	1.32488	0.119675	0.499045	1	1513	tags=31%, list=12%, signal=35%
GO_NUCLEOTIDE_BINDING_DOMAIN_LEUCINE_RICH_REPEAT_CONTAINING_RECEPTOR_SIGNALING_PATHWAY	GO_NUCLEOTIDE_BINDING_DOMAIN_LEUCINE_RICH_REPEAT_CONTAINING_RECEPTOR_SIGNALING_PATHWAY	Details ...	23	0.438821	1.32476	0.144628	0.498107	1	2976	tags=39%, list=23%, signal=51%
GO_NUCLEOTIDE_EXCISION_REPAIR	GO_NUCLEOTIDE_EXCISION_REPAIR	Details ...	99	0.388355	1.32276	0.158317	0.502157	1	2908	tags=38%, list=22%, signal=49%
GO_ESTABLISHMENT_OF_PROTEIN_LOCALIZATION_TO_VACUOLE	GO_ESTABLISHMENT_OF_PROTEIN_LOCALIZATION_TO_VACUOLE	Details ...	23	0.401358	1.32267	0.115942	0.501092	1	2832	tags=39%, list=22%, signal=50%
GO_TETRAPYRROLE_BINDING	GO_TETRAPYRROLE_BINDING	Details ...	110	0.436816	1.32262	0.0898204	0.499964	1	2156	tags=33%, list=17%, signal=39%
GO_RENAL_SYSTEM_PROCESS_INVOLVED_IN_REGULATION_OF_BLOOD_VOLUME	GO_RENAL_SYSTEM_PROCESS_INVOLVED_IN_REGULATION_OF_BLOOD_VOLUME	Details ...	16	0.557744	1.32259	0.12249	0.498769	1	889	tags=31%, list=7%, signal=33%
GO_CELLULAR_CARBOHYDRATE_BIOSYNTHETIC_PROCESS	GO_CELLULAR_CARBOHYDRATE_BIOSYNTHETIC_PROCESS	Details ...	41	0.400786	1.32171	0.0872865	0.499805	1	947	tags=22%, list=7%, signal=24%
GO_RESPONSE_TO_THYROID_HORMONE	GO_RESPONSE_TO_THYROID_HORMONE	Details ...	19	0.521333	1.32116	0.129555	0.499955	1	1872	tags=37%, list=14%, signal=43%
GO_GLUTATHIONE_METABOLIC_PROCESS	GO_GLUTATHIONE_METABOLIC_PROCESS	Details ...	44	0.473325	1.32111	0.127953	0.49884	1	3127	tags=57%, list=24%, signal=74%
GO_ADENYLYLTRANSFERASE_ACTIVITY	GO_ADENYLYLTRANSFERASE_ACTIVITY	Details ...	17	0.523093	1.32072	0.133197	0.49864	1	2039	tags=47%, list=16%, signal=56%
GO_N_ACETYLTRANSFERASE_ACTIVITY	GO_N_ACETYLTRANSFERASE_ACTIVITY	Details ...	48	0.360138	1.32032	0.0973282	0.498438	1	1399	tags=21%, list=11%, signal=23%
GO_REGULATION_OF_VIRAL_RELEASE_FROM_HOST_CELL	GO_REGULATION_OF_VIRAL_RELEASE_FROM_HOST_CELL		25	0.418733	1.31983	0.153386	0.498394	1	3476	tags=44%, list=27%, signal=60%
GO_PROTEIN_UBIQUITINATION_INVOLVED_IN_UBIQUITIN_DEPENDENT_PROTEIN_CATABOLIC_PROCESS	GO_PROTEIN_UBIQUITINATION_INVOLVED_IN_UBIQUITIN_DEPENDENT_PROTEIN_CATABOLIC_PROCESS		95	0.381037	1.3195	0.133891	0.497972	1	3730	tags=42%, list=29%, signal=59%
GO_POSITIVE_REGULATION_OF_PROTEIN_CATABOLIC_PROCESS	GO_POSITIVE_REGULATION_OF_PROTEIN_CATABOLIC_PROCESS		216	0.313341	1.31699	0.0846457	0.50322	1	2974	tags=36%, list=23%, signal=45%
GO_REGULATION_OF_NUCLEOSIDE_METABOLIC_PROCESS	GO_REGULATION_OF_NUCLEOSIDE_METABOLIC_PROCESS		45	0.439379	1.31625	0.128107	0.503966	1	2653	tags=38%, list=20%, signal=47%
GO_ATP_GENERATION_FROM_ADP	GO_ATP_GENERATION_FROM_ADP		36	0.507845	1.31565	0.127237	0.504259	1	1513	tags=39%, list=12%, signal=44%
GO_MACROAUTOPHAGY	GO_MACROAUTOPHAGY		204	0.290018	1.31521	0.0434783	0.504196	1	2417	tags=24%, list=19%, signal=29%
GO_CELLULAR_MODIFIED_AMINO_ACID_BIOSYNTHETIC_PROCESS	GO_CELLULAR_MODIFIED_AMINO_ACID_BIOSYNTHETIC_PROCESS		41	0.468805	1.31506	0.126437	0.503421	1	1604	tags=34%, list=12%, signal=39%
GO_GLYCOSYL_COMPOUND_CATABOLIC_PROCESS	GO_GLYCOSYL_COMPOUND_CATABOLIC_PROCESS		32	0.464508	1.31328	0.143411	0.50666	1	2788	tags=47%, list=21%, signal=59%
GO_ORGANELLE_DISASSEMBLY	GO_ORGANELLE_DISASSEMBLY		133	0.295235	1.31294	0.0526316	0.506213	1	2465	tags=26%, list=19%, signal=32%
GO_RENAL_SYSTEM_PROCESS_INVOLVED_IN_REGULATION_OF_SYSTEMIC_ARTERIAL_BLOOD_PRESSURE	GO_RENAL_SYSTEM_PROCESS_INVOLVED_IN_REGULATION_OF_SYSTEMIC_ARTERIAL_BLOOD_PRESSURE		22	0.507521	1.31282	0.109615	0.505325	1	889	tags=27%, list=7%, signal=29%
GO_DEOXYRIBOSE_PHOSPHATE_CATABOLIC_PROCESS	GO_DEOXYRIBOSE_PHOSPHATE_CATABOLIC_PROCESS		18	0.471203	1.31239	0.165306	0.505242	1	3902	tags=67%, list=30%, signal=95%
GO_PEPTIDE_CATABOLIC_PROCESS	GO_PEPTIDE_CATABOLIC_PROCESS		22	0.502558	1.31223	0.126733	0.504437	1	2075	tags=32%, list=16%, signal=38%
GO_POSITIVE_REGULATION_OF_STEROL_TRANSPORT	GO_POSITIVE_REGULATION_OF_STEROL_TRANSPORT		16	0.566796	1.31203	0.172745	0.503703	1	2738	tags=63%, list=21%, signal=79%
GO_PROTEIN_HYDROXYLATION	GO_PROTEIN_HYDROXYLATION		16	0.541862	1.3116	0.144603	0.503601	1	2094	tags=38%, list=16%, signal=45%
GO_CARBOHYDRATE_TRANSPORTER_ACTIVITY	GO_CARBOHYDRATE_TRANSPORTER_ACTIVITY		32	0.45043	1.31141	0.104536	0.502838	1	501	tags=19%, list=4%, signal=19%
GO_S_ACYLTRANSFERASE_ACTIVITY	GO_S_ACYLTRANSFERASE_ACTIVITY		15	0.545265	1.30985	0.154618	0.505668	1	2533	tags=47%, list=19%, signal=58%
GO_INTRINSIC_COMPONENT_OF_MITOCHONDRIAL_MEMBRANE	GO_INTRINSIC_COMPONENT_OF_MITOCHONDRIAL_MEMBRANE		34	0.420637	1.30948	0.149194	0.505411	1	4398	tags=65%, list=34%, signal=97%
GO_AMINO_SUGAR_METABOLIC_PROCESS	GO_AMINO_SUGAR_METABOLIC_PROCESS		33	0.452534	1.30901	0.108987	0.505412	1	1546	tags=30%, list=12%, signal=34%
GO_TRANSLATION_INITIATION_FACTOR_ACTIVITY	GO_TRANSLATION_INITIATION_FACTOR_ACTIVITY		29	0.460407	1.30888	0.205703	0.504514	1	2345	tags=41%, list=18%, signal=50%
GO_INTRINSIC_COMPONENT_OF_ENDOPLASMIC_RETICULUM_MEMBRANE	GO_INTRINSIC_COMPONENT_OF_ENDOPLASMIC_RETICULUM_MEMBRANE		94	0.393681	1.30856	0.116232	0.50412	1	2561	tags=34%, list=20%, signal=42%
GO_OXIDOREDUCTASE_ACTIVITY_ACTING_ON_THE_CH_NH_GROUP_OF_DONORS	GO_OXIDOREDUCTASE_ACTIVITY_ACTING_ON_THE_CH_NH_GROUP_OF_DONORS		21	0.58864	1.30822	0.180077	0.503808	1	1840	tags=52%, list=14%, signal=61%
GO_NUCLEOSIDE_PHOSPHATE_CATABOLIC_PROCESS	GO_NUCLEOSIDE_PHOSPHATE_CATABOLIC_PROCESS		55	0.340727	1.30735	0.0943775	0.504786	1	3000	tags=35%, list=23%, signal=45%
GO_PROTEASOMAL_PROTEIN_CATABOLIC_PROCESS	GO_PROTEASOMAL_PROTEIN_CATABOLIC_PROCESS		205	0.340644	1.30388	0.134021	0.512624	1	3641	tags=43%, list=28%, signal=59%
GO_REGULATION_OF_TRIGLYCERIDE_METABOLIC_PROCESS	GO_REGULATION_OF_TRIGLYCERIDE_METABOLIC_PROCESS		21	0.51293	1.30318	0.187377	0.513264	1	2546	tags=62%, list=20%, signal=77%
GO_RNA_METHYLATION	GO_RNA_METHYLATION		28	0.406845	1.30285	0.178947	0.51289	1	2294	tags=29%, list=18%, signal=35%
GO_GLUTAMINE_METABOLIC_PROCESS	GO_GLUTAMINE_METABOLIC_PROCESS		21	0.497584	1.30197	0.104046	0.513925	1	1142	tags=38%, list=9%, signal=42%
GO_NEGATIVE_REGULATION_OF_PROTEIN_MODIFICATION_BY_SMALL_PROTEIN_CONJUGATION_OR_REMOVAL	GO_NEGATIVE_REGULATION_OF_PROTEIN_MODIFICATION_BY_SMALL_PROTEIN_CONJUGATION_OR_REMOVAL		114	0.367247	1.30166	0.164329	0.513481	1	3034	tags=37%, list=23%, signal=48%
GO_REGULATION_OF_STEROL_TRANSPORT	GO_REGULATION_OF_STEROL_TRANSPORT		33	0.47021	1.30115	0.171375	0.513598	1	2845	tags=45%, list=22%, signal=58%
GO_ANTIGEN_PROCESSING_AND_PRESENTATION_OF_PEPTIDE_ANTIGEN_VIA_MHC_CLASS_I	GO_ANTIGEN_PROCESSING_AND_PRESENTATION_OF_PEPTIDE_ANTIGEN_VIA_MHC_CLASS_I		85	0.402504	1.29946	0.177388	0.516759	1	2827	tags=39%, list=22%, signal=49%
GO_N_GLYCAN_PROCESSING	GO_N_GLYCAN_PROCESSING		18	0.46357	1.29667	0.131528	0.522858	1	2095	tags=44%, list=16%, signal=53%
GO_POSITIVE_REGULATION_OF_CELLULAR_PROTEIN_CATABOLIC_PROCESS	GO_POSITIVE_REGULATION_OF_CELLULAR_PROTEIN_CATABOLIC_PROCESS		156	0.313929	1.29563	0.13	0.52434	1	3316	tags=39%, list=25%, signal=52%
GO_SYMPORTER_ACTIVITY	GO_SYMPORTER_ACTIVITY		100	0.38075	1.29524	0.0815534	0.524123	1	538	tags=15%, list=4%, signal=16%
GO_RIBONUCLEOSIDE_TRIPHOSPHATE_BIOSYNTHETIC_PROCESS	GO_RIBONUCLEOSIDE_TRIPHOSPHATE_BIOSYNTHETIC_PROCESS		44	0.360283	1.29504	0.156942	0.523532	1	3394	tags=41%, list=26%, signal=55%
GO_ANAPHASE_PROMOTING_COMPLEX_DEPENDENT_CATABOLIC_PROCESS	GO_ANAPHASE_PROMOTING_COMPLEX_DEPENDENT_CATABOLIC_PROCESS		68	0.432554	1.29485	0.210744	0.522812	1	3316	tags=46%, list=25%, signal=61%
GO_HSP70_PROTEIN_BINDING	GO_HSP70_PROTEIN_BINDING		24	0.434628	1.29457	0.160896	0.522317	1	3862	tags=54%, list=30%, signal=77%
GO_COENZYME_A_METABOLIC_PROCESS	GO_COENZYME_A_METABOLIC_PROCESS		15	0.508634	1.29437	0.141053	0.52162	1	2968	tags=53%, list=23%, signal=69%
GO_AXON_CYTOPLASM	GO_AXON_CYTOPLASM		23	0.41689	1.29303	0.151329	0.523903	1	2498	tags=39%, list=19%, signal=48%
GO_AMIDE_BIOSYNTHETIC_PROCESS	GO_AMIDE_BIOSYNTHETIC_PROCESS		358	0.289667	1.29254	0.147573	0.523957	1	2377	tags=25%, list=18%, signal=30%
GO_REGULATION_OF_PROTEIN_KINASE_A_SIGNALING	GO_REGULATION_OF_PROTEIN_KINASE_A_SIGNALING		15	0.423901	1.29234	0.184524	0.523289	1	557	tags=13%, list=4%, signal=14%
GO_REGULATION_OF_GLUCONEOGENESIS	GO_REGULATION_OF_GLUCONEOGENESIS		22	0.521729	1.29231	0.179688	0.522166	1	1220	tags=32%, list=9%, signal=35%
GO_NUCLEOBASE_METABOLIC_PROCESS	GO_NUCLEOBASE_METABOLIC_PROCESS		29	0.487842	1.29213	0.129344	0.521481	1	1176	tags=28%, list=9%, signal=30%
GO_LIPID_MODIFICATION	GO_LIPID_MODIFICATION		162	0.353458	1.2913	0.127135	0.522472	1	2749	tags=37%, list=21%, signal=46%
GO_REGULATION_OF_ESTABLISHMENT_OF_PLANAR_POLARITY	GO_REGULATION_OF_ESTABLISHMENT_OF_PLANAR_POLARITY		95	0.333692	1.29065	0.126016	0.522918	1	3368	tags=43%, list=26%, signal=58%
GO_ORGANIC_ACID_TRANSMEMBRANE_TRANSPORTER_ACTIVITY	GO_ORGANIC_ACID_TRANSMEMBRANE_TRANSPORTER_ACTIVITY		98	0.427463	1.28966	0.116054	0.524328	1	1400	tags=23%, list=11%, signal=26%
GO_ISOMERASE_ACTIVITY	GO_ISOMERASE_ACTIVITY		109	0.342186	1.28816	0.12326	0.527172	1	2094	tags=28%, list=16%, signal=34%
GO_ENDOSOME_ORGANIZATION	GO_ENDOSOME_ORGANIZATION		40	0.418188	1.28798	0.168357	0.526416	1	2730	tags=40%, list=21%, signal=50%
GO_REGULATION_OF_EXOSOMAL_SECRETION	GO_REGULATION_OF_EXOSOMAL_SECRETION		15	0.479688	1.28656	0.189084	0.528954	1	2991	tags=47%, list=23%, signal=60%
GO_RESPONSE_TO_COPPER_ION	GO_RESPONSE_TO_COPPER_ION		27	0.453343	1.28548	0.122951	0.530563	1	925	tags=22%, list=7%, signal=24%
GO_COMPLEMENT_BINDING	GO_COMPLEMENT_BINDING		18	0.576347	1.28529	0.178499	0.529902	1	871	tags=33%, list=7%, signal=36%
GO_NEGATIVE_REGULATION_OF_NUCLEOSIDE_METABOLIC_PROCESS	GO_NEGATIVE_REGULATION_OF_NUCLEOSIDE_METABOLIC_PROCESS		18	0.533951	1.28511	0.165354	0.529187	1	2653	tags=56%, list=20%, signal=70%
GO_ENDOPLASMIC_RETICULUM_GOLGI_INTERMEDIATE_COMPARTMENT_MEMBRANE	GO_ENDOPLASMIC_RETICULUM_GOLGI_INTERMEDIATE_COMPARTMENT_MEMBRANE		51	0.415963	1.28385	0.163498	0.53137	1	2596	tags=39%, list=20%, signal=49%
GO_TRNA_METABOLIC_PROCESS	GO_TRNA_METABOLIC_PROCESS		116	0.353204	1.28357	0.216327	0.53088	1	3580	tags=42%, list=27%, signal=58%
GO_PROTEIN_IMPORT	GO_PROTEIN_IMPORT		137	0.326195	1.28355	0.128257	0.529757	1	2695	tags=31%, list=21%, signal=39%
GO_REGULATION_OF_CELLULAR_PROTEIN_CATABOLIC_PROCESS	GO_REGULATION_OF_CELLULAR_PROTEIN_CATABOLIC_PROCESS		222	0.309028	1.2835	0.126016	0.528717	1	3319	tags=37%, list=25%, signal=49%
GO_REVERSE_CHOLESTEROL_TRANSPORT	GO_REVERSE_CHOLESTEROL_TRANSPORT		16	0.58087	1.28301	0.198842	0.528737	1	2738	tags=63%, list=21%, signal=79%
GO_AMMONIUM_TRANSPORT	GO_AMMONIUM_TRANSPORT		49	0.392655	1.28264	0.120459	0.528533	1	2208	tags=29%, list=17%, signal=34%
GO_POSITIVE_REGULATION_OF_PROTEOLYSIS	GO_POSITIVE_REGULATION_OF_PROTEOLYSIS		302	0.297216	1.28257	0.082	0.527563	1	2899	tags=33%, list=22%, signal=42%
GO_PROTEIN_UBIQUITINATION	GO_PROTEIN_UBIQUITINATION		401	0.296215	1.28246	0.111328	0.526702	1	3287	tags=33%, list=25%, signal=43%
GO_RESPONSE_TO_TOPOLOGICALLY_INCORRECT_PROTEIN	GO_RESPONSE_TO_TOPOLOGICALLY_INCORRECT_PROTEIN		137	0.344695	1.28099	0.155769	0.529366	1	3665	tags=44%, list=28%, signal=60%
GO_MYELIN_SHEATH	GO_MYELIN_SHEATH		148	0.337557	1.28062	0.134653	0.529221	1	2872	tags=34%, list=22%, signal=44%
GO_ACTIVE_TRANSMEMBRANE_TRANSPORTER_ACTIVITY	GO_ACTIVE_TRANSMEMBRANE_TRANSPORTER_ACTIVITY		263	0.329149	1.27967	0.0627376	0.530588	1	1382	tags=17%, list=11%, signal=19%
GO_REGULATION_OF_PROTEIN_MODIFICATION_BY_SMALL_PROTEIN_CONJUGATION_OR_REMOVAL	GO_REGULATION_OF_PROTEIN_MODIFICATION_BY_SMALL_PROTEIN_CONJUGATION_OR_REMOVAL		218	0.330373	1.27767	0.128834	0.534514	1	2610	tags=31%, list=20%, signal=38%
GO_NEGATIVE_REGULATION_OF_RELEASE_OF_CYTOCHROME_C_FROM_MITOCHONDRIA	GO_NEGATIVE_REGULATION_OF_RELEASE_OF_CYTOCHROME_C_FROM_MITOCHONDRIA		16	0.48564	1.27732	0.170093	0.534334	1	3206	tags=44%, list=25%, signal=58%
GO_ARF_GUANYL_NUCLEOTIDE_EXCHANGE_FACTOR_ACTIVITY	GO_ARF_GUANYL_NUCLEOTIDE_EXCHANGE_FACTOR_ACTIVITY		17	0.444752	1.27679	0.143418	0.534516	1	3636	tags=53%, list=28%, signal=73%
GO_SOLUTE_CATION_SYMPORTER_ACTIVITY	GO_SOLUTE_CATION_SYMPORTER_ACTIVITY		78	0.379081	1.27627	0.0992218	0.534734	1	1056	tags=17%, list=8%, signal=18%
GO_MONOSACCHARIDE_TRANSMEMBRANE_TRANSPORTER_ACTIVITY	GO_MONOSACCHARIDE_TRANSMEMBRANE_TRANSPORTER_ACTIVITY		15	0.528541	1.27616	0.158111	0.533853	1	501	tags=20%, list=4%, signal=21%
GO_SODIUM_ION_HOMEOSTASIS	GO_SODIUM_ION_HOMEOSTASIS		27	0.444335	1.27574	0.152778	0.533771	1	1074	tags=19%, list=8%, signal=20%
GO_REGULATION_OF_PROTEIN_CATABOLIC_PROCESS	GO_REGULATION_OF_PROTEIN_CATABOLIC_PROCESS		319	0.294555	1.27456	0.122093	0.535668	1	2991	tags=34%, list=23%, signal=43%
GO_OXIDOREDUCTASE_ACTIVITY_ACTING_ON_PAIRED_DONORS_WITH_INCORPORATION_OR_REDUCTION_OF_MOLECULAR_OXYGEN_2_OXOGLUTARATE_AS_ONE_DONOR_AND_INCORPORATION_OF_ONE_ATOM_EACH_OF_OXYGEN_INTO_BOTH_DONORS	GO_OXIDOREDUCTASE_ACTIVITY_ACTING_ON_PAIRED_DONORS_WITH_INCORPORATION_OR_REDUCTION_OF_MOLECULAR_OXYGEN_2_OXOGLUTARATE_AS_ONE_DONOR_AND_INCORPORATION_OF_ONE_ATOM_EACH_OF_OXYGEN_INTO_BOTH_DONORS		25	0.453074	1.27453	0.166337	0.534619	1	2094	tags=32%, list=16%, signal=38%
GO_REGULATION_OF_NUCLEOTIDE_CATABOLIC_PROCESS	GO_REGULATION_OF_NUCLEOTIDE_CATABOLIC_PROCESS		36	0.432652	1.27398	0.145631	0.534913	1	2653	tags=39%, list=20%, signal=49%
GO_POSITIVE_REGULATION_OF_ATPASE_ACTIVITY	GO_POSITIVE_REGULATION_OF_ATPASE_ACTIVITY		32	0.404788	1.2737	0.129032	0.534489	1	281	tags=13%, list=2%, signal=13%
GO_LIPID_STORAGE	GO_LIPID_STORAGE		21	0.451722	1.27345	0.164384	0.534018	1	2364	tags=38%, list=18%, signal=46%
GO_CARBOHYDRATE_TRANSMEMBRANE_TRANSPORT	GO_CARBOHYDRATE_TRANSMEMBRANE_TRANSPORT		17	0.481148	1.27193	0.176707	0.5369	1	501	tags=18%, list=4%, signal=18%
GO_STEROID_CATABOLIC_PROCESS	GO_STEROID_CATABOLIC_PROCESS		24	0.558871	1.27063	0.187251	0.539157	1	2056	tags=50%, list=16%, signal=59%
GO_NUCLEOTIDE_SUGAR_BIOSYNTHETIC_PROCESS	GO_NUCLEOTIDE_SUGAR_BIOSYNTHETIC_PROCESS		18	0.494602	1.27026	0.159184	0.539022	1	2774	tags=44%, list=21%, signal=56%
GO_VACUOLAR_MEMBRANE	GO_VACUOLAR_MEMBRANE		418	0.306493	1.26851	0.103792	0.542441	1	2836	tags=32%, list=22%, signal=39%
GO_METALLOEXOPEPTIDASE_ACTIVITY	GO_METALLOEXOPEPTIDASE_ACTIVITY		38	0.421465	1.26826	0.160853	0.541996	1	681	tags=21%, list=5%, signal=22%
GO_RESPONSE_TO_GLUCAGON	GO_RESPONSE_TO_GLUCAGON		43	0.400299	1.26815	0.155512	0.541131	1	887	tags=19%, list=7%, signal=20%
GO_GLUTATHIONE_TRANSFERASE_ACTIVITY	GO_GLUTATHIONE_TRANSFERASE_ACTIVITY		27	0.486338	1.26788	0.17732	0.54076	1	2872	tags=48%, list=22%, signal=62%
GO_ADP_BINDING	GO_ADP_BINDING		32	0.423307	1.26731	0.159393	0.541093	1	3561	tags=56%, list=27%, signal=77%
GO_MEMBRANE_LIPID_BIOSYNTHETIC_PROCESS	GO_MEMBRANE_LIPID_BIOSYNTHETIC_PROCESS		74	0.332798	1.26657	0.119608	0.54183	1	2245	tags=30%, list=17%, signal=36%
GO_COATED_MEMBRANE	GO_COATED_MEMBRANE		68	0.353476	1.26634	0.157058	0.541291	1	2407	tags=29%, list=18%, signal=36%
GO_REGULATION_OF_CARBOHYDRATE_CATABOLIC_PROCESS	GO_REGULATION_OF_CARBOHYDRATE_CATABOLIC_PROCESS		39	0.421936	1.26579	0.163188	0.541557	1	2653	tags=36%, list=20%, signal=45%
GO_MODIFIED_AMINO_ACID_TRANSPORT	GO_MODIFIED_AMINO_ACID_TRANSPORT		23	0.510439	1.26541	0.147228	0.541364	1	1682	tags=30%, list=13%, signal=35%
GO_CALCIUM_ACTIVATED_CATION_CHANNEL_ACTIVITY	GO_CALCIUM_ACTIVATED_CATION_CHANNEL_ACTIVITY		15	0.463377	1.26485	0.160752	0.541716	1	2235	tags=27%, list=17%, signal=32%
GO_MEMBRANE_PROTEIN_ECTODOMAIN_PROTEOLYSIS	GO_MEMBRANE_PROTEIN_ECTODOMAIN_PROTEOLYSIS		16	0.517133	1.26446	0.2	0.541629	1	1865	tags=38%, list=14%, signal=44%
GO_RIBONUCLEASE_ACTIVITY	GO_RIBONUCLEASE_ACTIVITY		66	0.358925	1.26424	0.168357	0.541158	1	3516	tags=44%, list=27%, signal=60%
GO_DEATH_RECEPTOR_BINDING	GO_DEATH_RECEPTOR_BINDING		15	0.48234	1.26309	0.202869	0.543118	1	1894	tags=40%, list=15%, signal=47%
GO_KINESIN_BINDING	GO_KINESIN_BINDING		24	0.417542	1.263	0.195426	0.542269	1	1810	tags=25%, list=14%, signal=29%
GO_PYRIMIDINE_CONTAINING_COMPOUND_CATABOLIC_PROCESS	GO_PYRIMIDINE_CONTAINING_COMPOUND_CATABOLIC_PROCESS		25	0.457602	1.26152	0.16791	0.545028	1	2569	tags=48%, list=20%, signal=60%
GO_REGULATION_OF_AUTOPHAGOSOME_ASSEMBLY	GO_REGULATION_OF_AUTOPHAGOSOME_ASSEMBLY		22	0.410014	1.26147	0.179226	0.544079	1	1738	tags=27%, list=13%, signal=31%
GO_INTRACELLULAR_LIPID_TRANSPORT	GO_INTRACELLULAR_LIPID_TRANSPORT		17	0.529784	1.26065	0.219466	0.545159	1	2968	tags=53%, list=23%, signal=68%
GO_CYTOPLASMIC_PATTERN_RECOGNITION_RECEPTOR_SIGNALING_PATHWAY	GO_CYTOPLASMIC_PATTERN_RECOGNITION_RECEPTOR_SIGNALING_PATHWAY		27	0.421402	1.25984	0.17732	0.546136	1	1003	tags=19%, list=8%, signal=20%
GO_REGULATION_OF_ERAD_PATHWAY	GO_REGULATION_OF_ERAD_PATHWAY		21	0.407839	1.2595	0.193424	0.545881	1	3370	tags=57%, list=26%, signal=77%
GO_FIBRINOLYSIS	GO_FIBRINOLYSIS		21	0.535221	1.25809	0.217143	0.548472	1	2878	tags=52%, list=22%, signal=67%
GO_ER_NUCLEUS_SIGNALING_PATHWAY	GO_ER_NUCLEUS_SIGNALING_PATHWAY		28	0.453068	1.25788	0.187621	0.54791	1	2796	tags=46%, list=21%, signal=59%
GO_AUTOPHAGY	GO_AUTOPHAGY		279	0.273112	1.257	0.0944882	0.549127	1	1912	tags=21%, list=15%, signal=24%
GO_COFACTOR_TRANSPORT	GO_COFACTOR_TRANSPORT		19	0.521633	1.25674	0.18677	0.548704	1	1634	tags=37%, list=13%, signal=42%
GO_LIGASE_ACTIVITY_FORMING_CARBON_NITROGEN_BONDS	GO_LIGASE_ACTIVITY_FORMING_CARBON_NITROGEN_BONDS		40	0.406645	1.25597	0.148649	0.549554	1	2096	tags=38%, list=16%, signal=45%
GO_ATPASE_COUPLED_ION_TRANSMEMBRANE_TRANSPORTER_ACTIVITY	GO_ATPASE_COUPLED_ION_TRANSMEMBRANE_TRANSPORTER_ACTIVITY		62	0.362974	1.25592	0.133205	0.548585	1	2184	tags=31%, list=17%, signal=37%
GO_BLOOD_COAGULATION_INTRINSIC_PATHWAY	GO_BLOOD_COAGULATION_INTRINSIC_PATHWAY		18	0.585674	1.25589	0.256121	0.547572	1	3124	tags=67%, list=24%, signal=88%
GO_VACUOLE_ORGANIZATION	GO_VACUOLE_ORGANIZATION		112	0.338435	1.25367	0.14611	0.552283	1	2770	tags=35%, list=21%, signal=44%
GO_CARBOHYDRATE_TRANSPORT	GO_CARBOHYDRATE_TRANSPORT		68	0.354706	1.25336	0.124283	0.551981	1	947	tags=18%, list=7%, signal=19%
GO_NEGATIVE_REGULATION_OF_RECEPTOR_ACTIVITY	GO_NEGATIVE_REGULATION_OF_RECEPTOR_ACTIVITY		23	0.443933	1.25204	0.178295	0.554279	1	2872	tags=43%, list=22%, signal=56%
GO_HISTONE_H3_DEACETYLATION	GO_HISTONE_H3_DEACETYLATION		18	0.400154	1.25125	0.197095	0.555211	1	2413	tags=33%, list=19%, signal=41%
GO_RNA_PHOSPHODIESTER_BOND_HYDROLYSIS_EXONUCLEOLYTIC	GO_RNA_PHOSPHODIESTER_BOND_HYDROLYSIS_EXONUCLEOLYTIC		22	0.45907	1.25105	0.203742	0.554654	1	3760	tags=59%, list=29%, signal=83%
GO_PORE_COMPLEX	GO_PORE_COMPLEX		16	0.593026	1.25077	0.241715	0.554275	1	1586	tags=38%, list=12%, signal=43%
GO_PROTEIN_MONOUBIQUITINATION	GO_PROTEIN_MONOUBIQUITINATION		42	0.382933	1.25033	0.158416	0.554336	1	2196	tags=29%, list=17%, signal=34%
GO_PROTEIN_TETRAMERIZATION	GO_PROTEIN_TETRAMERIZATION		115	0.338674	1.25026	0.140625	0.553445	1	3102	tags=37%, list=24%, signal=48%
GO_ATPASE_REGULATOR_ACTIVITY	GO_ATPASE_REGULATOR_ACTIVITY		25	0.465242	1.24974	0.210117	0.553686	1	4048	tags=56%, list=31%, signal=81%
GO_SINGLE_ORGANISM_MEMBRANE_FUSION	GO_SINGLE_ORGANISM_MEMBRANE_FUSION		80	0.325304	1.24943	0.167665	0.55341	1	3509	tags=44%, list=27%, signal=59%
GO_ATP_BIOSYNTHETIC_PROCESS	GO_ATP_BIOSYNTHETIC_PROCESS		31	0.360982	1.24891	0.221774	0.553713	1	3394	tags=48%, list=26%, signal=65%
GO_REGULATION_OF_RESPONSE_TO_OXIDATIVE_STRESS	GO_REGULATION_OF_RESPONSE_TO_OXIDATIVE_STRESS		57	0.344453	1.24748	0.111336	0.556307	1	2213	tags=28%, list=17%, signal=34%
GO_HEPATICOBILIARY_SYSTEM_DEVELOPMENT	GO_HEPATICOBILIARY_SYSTEM_DEVELOPMENT		108	0.391687	1.24729	0.136821	0.555695	1	1896	tags=31%, list=15%, signal=37%
GO_TRANSLATION_INITIATION_FACTOR_BINDING	GO_TRANSLATION_INITIATION_FACTOR_BINDING		19	0.491405	1.24711	0.224652	0.555128	1	4086	tags=47%, list=31%, signal=69%
GO_PHOSPHATE_TRANSMEMBRANE_TRANSPORTER_ACTIVITY	GO_PHOSPHATE_TRANSMEMBRANE_TRANSPORTER_ACTIVITY		21	0.433033	1.24663	0.163223	0.555237	1	689	tags=24%, list=5%, signal=25%
GO_PRE_AUTOPHAGOSOMAL_STRUCTURE	GO_PRE_AUTOPHAGOSOMAL_STRUCTURE		19	0.429058	1.24592	0.230924	0.555958	1	2517	tags=37%, list=19%, signal=46%
GO_CHANNEL_INHIBITOR_ACTIVITY	GO_CHANNEL_INHIBITOR_ACTIVITY		32	0.352913	1.2459	0.127572	0.554917	1	2449	tags=28%, list=19%, signal=35%
GO_EMBRYONIC_AXIS_SPECIFICATION	GO_EMBRYONIC_AXIS_SPECIFICATION		25	0.404181	1.2458	0.140316	0.554139	1	1769	tags=28%, list=14%, signal=32%
GO_REGULATION_OF_HISTONE_H3_K4_METHYLATION	GO_REGULATION_OF_HISTONE_H3_K4_METHYLATION		23	0.408329	1.24577	0.229675	0.553123	1	1853	tags=30%, list=14%, signal=35%
GO_REGULATION_OF_GLUCOSE_METABOLIC_PROCESS	GO_REGULATION_OF_GLUCOSE_METABOLIC_PROCESS		79	0.398434	1.24573	0.16185	0.552165	1	2042	tags=32%, list=16%, signal=37%
GO_NECROTIC_CELL_DEATH	GO_NECROTIC_CELL_DEATH		22	0.496319	1.24535	0.193294	0.552043	1	2395	tags=36%, list=18%, signal=44%
GO_POSITIVE_REGULATION_OF_LIPID_TRANSPORT	GO_POSITIVE_REGULATION_OF_LIPID_TRANSPORT		47	0.374242	1.24535	0.174573	0.550993	1	2738	tags=34%, list=21%, signal=43%
GO_ORGANELLE_FUSION	GO_ORGANELLE_FUSION		81	0.325544	1.24505	0.158111	0.550746	1	3509	tags=43%, list=27%, signal=59%
GO_REGULATION_OF_RESPONSE_TO_REACTIVE_OXYGEN_SPECIES	GO_REGULATION_OF_RESPONSE_TO_REACTIVE_OXYGEN_SPECIES		30	0.42677	1.24499	0.156	0.549862	1	1282	tags=27%, list=10%, signal=30%
GO_MULTIVESICULAR_BODY_ORGANIZATION	GO_MULTIVESICULAR_BODY_ORGANIZATION		20	0.468419	1.24359	0.235537	0.55247	1	3135	tags=55%, list=24%, signal=72%
GO_HYDROGEN_EXPORTING_ATPASE_ACTIVITY	GO_HYDROGEN_EXPORTING_ATPASE_ACTIVITY		22	0.442295	1.24249	0.238095	0.554216	1	3142	tags=55%, list=24%, signal=72%
GO_STEROID_HYDROXYLASE_ACTIVITY	GO_STEROID_HYDROXYLASE_ACTIVITY		27	0.555589	1.24233	0.212062	0.553592	1	702	tags=30%, list=5%, signal=31%
GO_TERPENOID_METABOLIC_PROCESS	GO_TERPENOID_METABOLIC_PROCESS		85	0.401315	1.24012	0.169323	0.558186	1	2154	tags=32%, list=17%, signal=38%
GO_ACUTE_PHASE_RESPONSE	GO_ACUTE_PHASE_RESPONSE		37	0.515953	1.23979	0.221294	0.557981	1	2946	tags=49%, list=23%, signal=63%
GO_NEGATIVE_REGULATION_OF_STEROID_METABOLIC_PROCESS	GO_NEGATIVE_REGULATION_OF_STEROID_METABOLIC_PROCESS		19	0.491017	1.23949	0.189555	0.557655	1	2068	tags=32%, list=16%, signal=37%
GO_HYDROLASE_ACTIVITY_HYDROLYZING_N_GLYCOSYL_COMPOUNDS	GO_HYDROLASE_ACTIVITY_HYDROLYZING_N_GLYCOSYL_COMPOUNDS		19	0.441429	1.2393	0.199187	0.557074	1	2873	tags=42%, list=22%, signal=54%
GO_CELL_PROJECTION_CYTOPLASM	GO_CELL_PROJECTION_CYTOPLASM		37	0.349754	1.23686	0.168675	0.562479	1	3030	tags=41%, list=23%, signal=53%
GO_RNA_PHOSPHODIESTER_BOND_HYDROLYSIS	GO_RNA_PHOSPHODIESTER_BOND_HYDROLYSIS		85	0.353979	1.23679	0.203156	0.561601	1	3211	tags=40%, list=25%, signal=53%
GO_POSITIVE_REGULATION_OF_CANONICAL_WNT_SIGNALING_PATHWAY	GO_POSITIVE_REGULATION_OF_CANONICAL_WNT_SIGNALING_PATHWAY		95	0.297143	1.23516	0.172816	0.564793	1	3697	tags=42%, list=28%, signal=58%
GO_TRANSCRIPTION_ELONGATION_FACTOR_COMPLEX	GO_TRANSCRIPTION_ELONGATION_FACTOR_COMPLEX		39	0.33804	1.23509	0.211268	0.563948	1	3159	tags=36%, list=24%, signal=47%
GO_PYRIMIDINE_NUCLEOSIDE_BIOSYNTHETIC_PROCESS	GO_PYRIMIDINE_NUCLEOSIDE_BIOSYNTHETIC_PROCESS		23	0.455195	1.23463	0.182008	0.564061	1	950	tags=17%, list=7%, signal=19%
GO_NUCLEOSIDE_MONOPHOSPHATE_BIOSYNTHETIC_PROCESS	GO_NUCLEOSIDE_MONOPHOSPHATE_BIOSYNTHETIC_PROCESS		69	0.325357	1.23447	0.167347	0.563428	1	3394	tags=36%, list=26%, signal=49%
GO_ESTROGEN_METABOLIC_PROCESS	GO_ESTROGEN_METABOLIC_PROCESS		20	0.472942	1.23434	0.178862	0.562725	1	1698	tags=35%, list=13%, signal=40%
GO_REGULATION_OF_MITOCHONDRIAL_MEMBRANE_PERMEABILITY_INVOLVED_IN_APOPTOTIC_PROCESS	GO_REGULATION_OF_MITOCHONDRIAL_MEMBRANE_PERMEABILITY_INVOLVED_IN_APOPTOTIC_PROCESS		18	0.435326	1.23362	0.225673	0.563472	1	2860	tags=39%, list=22%, signal=50%
GO_I_KAPPAB_KINASE_NF_KAPPAB_SIGNALING	GO_I_KAPPAB_KINASE_NF_KAPPAB_SIGNALING		58	0.348663	1.23321	0.174757	0.563484	1	2435	tags=24%, list=19%, signal=30%
GO_SODIUM_CHANNEL_REGULATOR_ACTIVITY	GO_SODIUM_CHANNEL_REGULATOR_ACTIVITY		25	0.455963	1.23251	0.166994	0.564191	1	1980	tags=32%, list=15%, signal=38%
GO_AMINE_METABOLIC_PROCESS	GO_AMINE_METABOLIC_PROCESS		91	0.377818	1.2324	0.163065	0.563439	1	1541	tags=24%, list=12%, signal=27%
GO_GUANOSINE_CONTAINING_COMPOUND_METABOLIC_PROCESS	GO_GUANOSINE_CONTAINING_COMPOUND_METABOLIC_PROCESS		36	0.350267	1.23183	0.184109	0.5639	1	2643	tags=22%, list=20%, signal=28%
GO_RRNA_BINDING	GO_RRNA_BINDING		46	0.364285	1.23137	0.250996	0.563971	1	1736	tags=24%, list=13%, signal=27%
GO_PROTEIN_STABILIZATION	GO_PROTEIN_STABILIZATION		114	0.311557	1.2309	0.111324	0.564155	1	2346	tags=27%, list=18%, signal=33%
GO_ACTIVE_ION_TRANSMEMBRANE_TRANSPORTER_ACTIVITY	GO_ACTIVE_ION_TRANSMEMBRANE_TRANSPORTER_ACTIVITY		138	0.323237	1.23086	0.0998152	0.563226	1	2208	tags=23%, list=17%, signal=28%
GO_NAD_METABOLIC_PROCESS	GO_NAD_METABOLIC_PROCESS		46	0.463156	1.23068	0.196464	0.562628	1	1716	tags=37%, list=13%, signal=42%
GO_DEOXYRIBONUCLEOTIDE_METABOLIC_PROCESS	GO_DEOXYRIBONUCLEOTIDE_METABOLIC_PROCESS		29	0.405301	1.23049	0.229039	0.562113	1	2873	tags=41%, list=22%, signal=53%
GO_PROTEIN_DEACETYLASE_ACTIVITY	GO_PROTEIN_DEACETYLASE_ACTIVITY		34	0.349524	1.23028	0.192547	0.561638	1	2664	tags=35%, list=20%, signal=44%
GO_PROTEIN_LIPID_COMPLEX_SUBUNIT_ORGANIZATION	GO_PROTEIN_LIPID_COMPLEX_SUBUNIT_ORGANIZATION		34	0.472814	1.2296	0.193798	0.562442	1	2913	tags=44%, list=22%, signal=57%
GO_POSITIVE_REGULATION_OF_PROTEIN_MODIFICATION_BY_SMALL_PROTEIN_CONJUGATION_OR_REMOVAL	GO_POSITIVE_REGULATION_OF_PROTEIN_MODIFICATION_BY_SMALL_PROTEIN_CONJUGATION_OR_REMOVAL		156	0.327932	1.22902	0.183716	0.562884	1	3206	tags=37%, list=25%, signal=48%
GO_NON_CANONICAL_WNT_SIGNALING_PATHWAY	GO_NON_CANONICAL_WNT_SIGNALING_PATHWAY		124	0.286602	1.22545	0.139059	0.57101	1	3117	tags=35%, list=24%, signal=45%
GO_VIRION_ASSEMBLY	GO_VIRION_ASSEMBLY		25	0.415167	1.22537	0.226562	0.570186	1	2146	tags=36%, list=16%, signal=43%
GO_PROTEIN_TYROSINE_KINASE_BINDING	GO_PROTEIN_TYROSINE_KINASE_BINDING		47	0.336339	1.22444	0.145129	0.571489	1	2621	tags=30%, list=20%, signal=37%
GO_PYRIMIDINE_RIBONUCLEOTIDE_METABOLIC_PROCESS	GO_PYRIMIDINE_RIBONUCLEOTIDE_METABOLIC_PROCESS		18	0.448897	1.22428	0.206122	0.570904	1	950	tags=17%, list=7%, signal=18%
GO_ACTIVATION_OF_JUN_KINASE_ACTIVITY	GO_ACTIVATION_OF_JUN_KINASE_ACTIVITY		31	0.35696	1.22357	0.183236	0.571658	1	1168	tags=19%, list=9%, signal=21%
GO_IRON_ION_HOMEOSTASIS	GO_IRON_ION_HOMEOSTASIS		54	0.393233	1.22317	0.180915	0.571677	1	2783	tags=39%, list=21%, signal=49%
GO_COATED_VESICLE	GO_COATED_VESICLE		193	0.295858	1.22259	0.15444	0.572148	1	2775	tags=30%, list=21%, signal=37%
GO_UBIQUITIN_LIGASE_COMPLEX	GO_UBIQUITIN_LIGASE_COMPLEX		157	0.307688	1.22238	0.170782	0.571634	1	3034	tags=32%, list=23%, signal=42%
GO_HEXOSE_CATABOLIC_PROCESS	GO_HEXOSE_CATABOLIC_PROCESS		46	0.431478	1.22088	0.174664	0.574318	1	1513	tags=30%, list=12%, signal=34%
GO_STEROL_METABOLIC_PROCESS	GO_STEROL_METABOLIC_PROCESS		107	0.419855	1.21988	0.196498	0.575807	1	2393	tags=33%, list=18%, signal=40%
GO_PYRIMIDINE_CONTAINING_COMPOUND_METABOLIC_PROCESS	GO_PYRIMIDINE_CONTAINING_COMPOUND_METABOLIC_PROCESS		60	0.367833	1.21934	0.1611	0.576167	1	3103	tags=38%, list=24%, signal=50%
GO_POSITIVE_REGULATION_OF_VIRAL_PROCESS	GO_POSITIVE_REGULATION_OF_VIRAL_PROCESS		82	0.321355	1.21912	0.206061	0.57568	1	2245	tags=27%, list=17%, signal=32%
GO_POTASSIUM_CHANNEL_REGULATOR_ACTIVITY	GO_POTASSIUM_CHANNEL_REGULATOR_ACTIVITY		38	0.330144	1.21906	0.188605	0.57482	1	2551	tags=26%, list=20%, signal=33%
GO_PROTEIN_K11_LINKED_UBIQUITINATION	GO_PROTEIN_K11_LINKED_UBIQUITINATION		20	0.43666	1.21831	0.232283	0.575722	1	3113	tags=45%, list=24%, signal=59%
GO_ATPASE_ACTIVITY_COUPLED_TO_TRANSMEMBRANE_MOVEMENT_OF_IONS_PHOSPHORYLATIVE_MECHANISM	GO_ATPASE_ACTIVITY_COUPLED_TO_TRANSMEMBRANE_MOVEMENT_OF_IONS_PHOSPHORYLATIVE_MECHANISM		29	0.414526	1.21721	0.175097	0.577526	1	1838	tags=24%, list=14%, signal=28%
GO_PHOSPHOLIPID_METABOLIC_PROCESS	GO_PHOSPHOLIPID_METABOLIC_PROCESS		256	0.279909	1.21698	0.0839695	0.577131	1	2784	tags=29%, list=21%, signal=37%
GO_AXO_DENDRITIC_TRANSPORT	GO_AXO_DENDRITIC_TRANSPORT		25	0.389691	1.21644	0.199605	0.577592	1	2498	tags=36%, list=19%, signal=44%
GO_ORGANIC_ACID_TRANSPORT	GO_ORGANIC_ACID_TRANSPORT		198	0.359731	1.21564	0.158915	0.578684	1	2208	tags=27%, list=17%, signal=32%
GO_ENDOPLASMIC_RETICULUM_GOLGI_INTERMEDIATE_COMPARTMENT	GO_ENDOPLASMIC_RETICULUM_GOLGI_INTERMEDIATE_COMPARTMENT		82	0.351657	1.21553	0.189655	0.577936	1	2596	tags=37%, list=20%, signal=45%
GO_PHOSPHOLIPID_BIOSYNTHETIC_PROCESS	GO_PHOSPHOLIPID_BIOSYNTHETIC_PROCESS		168	0.281334	1.21546	0.105263	0.577099	1	2058	tags=24%, list=16%, signal=28%
GO_SIGNAL_PEPTIDE_PROCESSING	GO_SIGNAL_PEPTIDE_PROCESSING		17	0.499248	1.21459	0.209924	0.578306	1	2273	tags=53%, list=17%, signal=64%
GO_PEPTIDYL_ASPARAGINE_MODIFICATION	GO_PEPTIDYL_ASPARAGINE_MODIFICATION		27	0.412815	1.2144	0.234432	0.5778	1	1982	tags=30%, list=15%, signal=35%
GO_ORGANIC_ANION_TRANSMEMBRANE_TRANSPORTER_ACTIVITY	GO_ORGANIC_ANION_TRANSMEMBRANE_TRANSPORTER_ACTIVITY		118	0.37715	1.21322	0.164329	0.579815	1	1400	tags=20%, list=11%, signal=23%
GO_GLYCEROLIPID_BIOSYNTHETIC_PROCESS	GO_GLYCEROLIPID_BIOSYNTHETIC_PROCESS		155	0.290476	1.21282	0.118774	0.579771	1	1945	tags=23%, list=15%, signal=27%
GO_MEMBRANE_DOCKING	GO_MEMBRANE_DOCKING		56	0.332286	1.21261	0.178988	0.579332	1	2417	tags=30%, list=19%, signal=37%
GO_PYRIMIDINE_CONTAINING_COMPOUND_BIOSYNTHETIC_PROCESS	GO_PYRIMIDINE_CONTAINING_COMPOUND_BIOSYNTHETIC_PROCESS		31	0.416635	1.21201	0.207819	0.579894	1	950	tags=16%, list=7%, signal=17%
GO_ACETYLGLUCOSAMINYLTRANSFERASE_ACTIVITY	GO_ACETYLGLUCOSAMINYLTRANSFERASE_ACTIVITY		38	0.345608	1.21167	0.204082	0.579706	1	1235	tags=24%, list=9%, signal=26%
GO_FATTY_ACID_BIOSYNTHETIC_PROCESS	GO_FATTY_ACID_BIOSYNTHETIC_PROCESS		87	0.366534	1.21048	0.160396	0.581728	1	1884	tags=28%, list=14%, signal=32%
GO_CYTOSOLIC_TRANSPORT	GO_CYTOSOLIC_TRANSPORT		142	0.290339	1.21031	0.157371	0.581151	1	3443	tags=37%, list=26%, signal=50%
GO_POSITIVE_REGULATION_OF_RESPONSE_TO_EXTRACELLULAR_STIMULUS	GO_POSITIVE_REGULATION_OF_RESPONSE_TO_EXTRACELLULAR_STIMULUS		40	0.33645	1.21019	0.192079	0.580441	1	3328	tags=35%, list=26%, signal=47%
GO_CHOLESTEROL_EFFLUX	GO_CHOLESTEROL_EFFLUX		23	0.444238	1.20925	0.25731	0.581867	1	2913	tags=43%, list=22%, signal=56%
GO_NADH_METABOLIC_PROCESS	GO_NADH_METABOLIC_PROCESS		35	0.458079	1.20911	0.210317	0.58124	1	1513	tags=34%, list=12%, signal=39%
GO_PH_REDUCTION	GO_PH_REDUCTION		33	0.400573	1.20838	0.233716	0.582052	1	2273	tags=36%, list=17%, signal=44%
GO_CARBOHYDRATE_DERIVATIVE_TRANSPORT	GO_CARBOHYDRATE_DERIVATIVE_TRANSPORT		35	0.389158	1.208	0.179487	0.581998	1	2738	tags=40%, list=21%, signal=51%
GO_GLUCOCORTICOID_METABOLIC_PROCESS	GO_GLUCOCORTICOID_METABOLIC_PROCESS		16	0.508905	1.207	0.242485	0.583533	1	1502	tags=31%, list=12%, signal=35%
GO_L_ASCORBIC_ACID_BINDING	GO_L_ASCORBIC_ACID_BINDING		17	0.481211	1.20681	0.237113	0.583044	1	1856	tags=35%, list=14%, signal=41%
GO_ISOPRENOID_BIOSYNTHETIC_PROCESS	GO_ISOPRENOID_BIOSYNTHETIC_PROCESS		21	0.470607	1.20611	0.225152	0.583806	1	495	tags=14%, list=4%, signal=15%
GO_GLYCEROLIPID_METABOLIC_PROCESS	GO_GLYCEROLIPID_METABOLIC_PROCESS		254	0.299381	1.20602	0.148496	0.583034	1	2322	tags=26%, list=18%, signal=31%
GO_FATTY_ACID_DERIVATIVE_METABOLIC_PROCESS	GO_FATTY_ACID_DERIVATIVE_METABOLIC_PROCESS		74	0.410355	1.20599	0.203125	0.582117	1	651	tags=19%, list=5%, signal=20%
GO_ANION_CATION_SYMPORTER_ACTIVITY	GO_ANION_CATION_SYMPORTER_ACTIVITY		46	0.428487	1.20565	0.200385	0.581987	1	1056	tags=17%, list=8%, signal=19%
GO_SOMATIC_DIVERSIFICATION_OF_IMMUNOGLOBULINS	GO_SOMATIC_DIVERSIFICATION_OF_IMMUNOGLOBULINS		23	0.407581	1.20525	0.237817	0.581992	1	1106	tags=22%, list=8%, signal=24%
GO_SECONDARY_ACTIVE_TRANSMEMBRANE_TRANSPORTER_ACTIVITY	GO_SECONDARY_ACTIVE_TRANSMEMBRANE_TRANSPORTER_ACTIVITY		162	0.328157	1.20503	0.141491	0.581621	1	538	tags=13%, list=4%, signal=13%
GO_ENERGY_COUPLED_PROTON_TRANSPORT_DOWN_ELECTROCHEMICAL_GRADIENT	GO_ENERGY_COUPLED_PROTON_TRANSPORT_DOWN_ELECTROCHEMICAL_GRADIENT		22	0.372215	1.20484	0.284254	0.581157	1	3394	tags=50%, list=26%, signal=67%
GO_NUCLEAR_INNER_MEMBRANE	GO_NUCLEAR_INNER_MEMBRANE		35	0.36252	1.20416	0.212851	0.581836	1	3645	tags=49%, list=28%, signal=67%
GO_SOMATIC_RECOMBINATION_OF_IMMUNOGLOBULIN_GENE_SEGMENTS	GO_SOMATIC_RECOMBINATION_OF_IMMUNOGLOBULIN_GENE_SEGMENTS		18	0.446947	1.20253	0.247444	0.585112	1	1106	tags=28%, list=8%, signal=30%
GO_LYTIC_VACUOLE_MEMBRANE	GO_LYTIC_VACUOLE_MEMBRANE		192	0.32144	1.20105	0.196078	0.588043	1	2417	tags=29%, list=19%, signal=35%
GO_TELOMERIC_DNA_BINDING	GO_TELOMERIC_DNA_BINDING		23	0.381892	1.2008	0.239919	0.587662	1	1693	tags=26%, list=13%, signal=30%
GO_POSITIVE_REGULATION_OF_LIPID_CATABOLIC_PROCESS	GO_POSITIVE_REGULATION_OF_LIPID_CATABOLIC_PROCESS		23	0.45888	1.20065	0.265594	0.58705	1	2749	tags=48%, list=21%, signal=61%
GO_MACROMOLECULAR_COMPLEX_REMODELING	GO_MACROMOLECULAR_COMPLEX_REMODELING		22	0.50047	1.20049	0.234733	0.586447	1	2738	tags=45%, list=21%, signal=57%
GO_OXIDOREDUCTASE_ACTIVITY_ACTING_ON_A_HEME_GROUP_OF_DONORS	GO_OXIDOREDUCTASE_ACTIVITY_ACTING_ON_A_HEME_GROUP_OF_DONORS		20	0.38093	1.19979	0.237903	0.587181	1	4234	tags=70%, list=32%, signal=104%
GO_VESICLE_COAT	GO_VESICLE_COAT		38	0.368871	1.19891	0.224762	0.588513	1	3171	tags=42%, list=24%, signal=55%
GO_CARBOHYDRATE_PHOSPHORYLATION	GO_CARBOHYDRATE_PHOSPHORYLATION		20	0.486928	1.19871	0.229755	0.588059	1	947	tags=35%, list=7%, signal=38%
GO_RETROGRADE_VESICLE_MEDIATED_TRANSPORT_GOLGI_TO_ER	GO_RETROGRADE_VESICLE_MEDIATED_TRANSPORT_GOLGI_TO_ER		62	0.416598	1.19837	0.27673	0.587988	1	3636	tags=50%, list=28%, signal=69%
GO_SPHINGOLIPID_METABOLIC_PROCESS	GO_SPHINGOLIPID_METABOLIC_PROCESS		95	0.299875	1.19791	0.188235	0.588169	1	1982	tags=24%, list=15%, signal=28%
GO_REGULATION_OF_MEMBRANE_PERMEABILITY	GO_REGULATION_OF_MEMBRANE_PERMEABILITY		58	0.342184	1.19687	0.236581	0.589748	1	3034	tags=36%, list=23%, signal=47%
GO_PHOSPHOLIPID_DEPHOSPHORYLATION	GO_PHOSPHOLIPID_DEPHOSPHORYLATION		24	0.387097	1.19671	0.223553	0.589204	1	2404	tags=29%, list=18%, signal=36%
GO_REGULATION_OF_PROTEIN_MATURATION	GO_REGULATION_OF_PROTEIN_MATURATION		66	0.427214	1.19663	0.25	0.588406	1	2488	tags=33%, list=19%, signal=41%
GO_STEROID_BINDING	GO_STEROID_BINDING		78	0.368342	1.19536	0.20229	0.590631	1	2172	tags=29%, list=17%, signal=35%
GO_ORGANELLE_LOCALIZATION	GO_ORGANELLE_LOCALIZATION		310	0.2877	1.19423	0.155689	0.592517	1	2737	tags=30%, list=21%, signal=37%
GO_ATPASE_ACTIVITY_COUPLED	GO_ATPASE_ACTIVITY_COUPLED		260	0.287527	1.19395	0.166337	0.592258	1	2210	tags=26%, list=17%, signal=30%
GO_REGULATION_OF_PH	GO_REGULATION_OF_PH		70	0.326293	1.19347	0.230476	0.592499	1	2273	tags=27%, list=17%, signal=33%
GO_CELLULAR_IRON_ION_HOMEOSTASIS	GO_CELLULAR_IRON_ION_HOMEOSTASIS		35	0.4135	1.19318	0.210526	0.592276	1	2368	tags=34%, list=18%, signal=42%
GO_GOLGI_ORGANIZATION	GO_GOLGI_ORGANIZATION		63	0.351851	1.19296	0.234469	0.591891	1	3345	tags=41%, list=26%, signal=55%
GO_CHAPERONE_MEDIATED_PROTEIN_FOLDING	GO_CHAPERONE_MEDIATED_PROTEIN_FOLDING		40	0.399884	1.19296	0.24717	0.590935	1	2862	tags=35%, list=22%, signal=45%
GO_GOLGI_MEMBRANE	GO_GOLGI_MEMBRANE		486	0.266777	1.19241	0.154739	0.591284	1	2784	tags=28%, list=21%, signal=34%
GO_EXOPEPTIDASE_ACTIVITY	GO_EXOPEPTIDASE_ACTIVITY		79	0.366599	1.19197	0.174797	0.59143	1	1807	tags=27%, list=14%, signal=31%
GO_AMINO_ACID_ACTIVATION	GO_AMINO_ACID_ACTIVATION		35	0.399716	1.19147	0.280738	0.59175	1	3430	tags=51%, list=26%, signal=70%
GO_PYRIMIDINE_NUCLEOSIDE_METABOLIC_PROCESS	GO_PYRIMIDINE_NUCLEOSIDE_METABOLIC_PROCESS		38	0.364555	1.19113	0.222222	0.591629	1	950	tags=18%, list=7%, signal=20%
GO_REGULATION_OF_LIPID_METABOLIC_PROCESS	GO_REGULATION_OF_LIPID_METABOLIC_PROCESS		226	0.325238	1.19096	0.166983	0.591134	1	2364	tags=30%, list=18%, signal=36%
GO_TRANSITION_METAL_ION_TRANSPORT	GO_TRANSITION_METAL_ION_TRANSPORT		83	0.298598	1.19073	0.172549	0.59074	1	2387	tags=30%, list=18%, signal=37%
GO_ORGANIC_ACID_TRANSMEMBRANE_TRANSPORT	GO_ORGANIC_ACID_TRANSMEMBRANE_TRANSPORT		71	0.413732	1.19056	0.202756	0.590192	1	3004	tags=41%, list=23%, signal=53%
GO_PROTEIN_MATURATION	GO_PROTEIN_MATURATION		219	0.305557	1.18968	0.130952	0.59147	1	2610	tags=31%, list=20%, signal=38%
GO_MRNA_CLEAVAGE	GO_MRNA_CLEAVAGE		18	0.442457	1.18958	0.271805	0.590764	1	1981	tags=39%, list=15%, signal=46%
GO_NEGATIVE_REGULATION_OF_LIPID_METABOLIC_PROCESS	GO_NEGATIVE_REGULATION_OF_LIPID_METABOLIC_PROCESS		59	0.359917	1.18917	0.199234	0.590813	1	2546	tags=34%, list=20%, signal=42%
GO_ORGANOPHOSPHATE_ESTER_TRANSPORT	GO_ORGANOPHOSPHATE_ESTER_TRANSPORT		67	0.337044	1.18784	0.216433	0.593273	1	2738	tags=31%, list=21%, signal=39%
GO_TRANSITION_METAL_ION_HOMEOSTASIS	GO_TRANSITION_METAL_ION_HOMEOSTASIS		82	0.352249	1.18754	0.182171	0.593043	1	3223	tags=41%, list=25%, signal=55%
GO_ORGANIC_ACID_BINDING	GO_ORGANIC_ACID_BINDING		173	0.345774	1.18741	0.181644	0.59245	1	1871	tags=27%, list=14%, signal=31%
GO_UBIQUITIN_LIKE_PROTEIN_LIGASE_ACTIVITY	GO_UBIQUITIN_LIKE_PROTEIN_LIGASE_ACTIVITY		119	0.315099	1.18662	0.257028	0.593407	1	3346	tags=35%, list=26%, signal=47%
GO_NUCLEASE_ACTIVITY	GO_NUCLEASE_ACTIVITY		134	0.307959	1.18608	0.214859	0.593906	1	3528	tags=40%, list=27%, signal=55%
GO_PROTEIN_LIPID_COMPLEX_ASSEMBLY	GO_PROTEIN_LIPID_COMPLEX_ASSEMBLY		20	0.509347	1.18571	0.244	0.59398	1	2913	tags=45%, list=22%, signal=58%
GO_ETHANOLAMINE_CONTAINING_COMPOUND_METABOLIC_PROCESS	GO_ETHANOLAMINE_CONTAINING_COMPOUND_METABOLIC_PROCESS		55	0.363133	1.18489	0.191205	0.595186	1	1421	tags=22%, list=11%, signal=24%
GO_NEGATIVE_REGULATION_OF_CARBOHYDRATE_METABOLIC_PROCESS	GO_NEGATIVE_REGULATION_OF_CARBOHYDRATE_METABOLIC_PROCESS		39	0.41867	1.18303	0.221797	0.599085	1	3013	tags=46%, list=23%, signal=60%
GO_TRIGLYCERIDE_LIPASE_ACTIVITY	GO_TRIGLYCERIDE_LIPASE_ACTIVITY		15	0.500137	1.1824	0.24	0.599696	1	1218	tags=33%, list=9%, signal=37%
GO_UBIQUITIN_LIKE_PROTEIN_CONJUGATING_ENZYME_BINDING	GO_UBIQUITIN_LIKE_PROTEIN_CONJUGATING_ENZYME_BINDING		20	0.396777	1.18188	0.240964	0.60004	1	3261	tags=45%, list=25%, signal=60%
GO_AMINO_ACID_BINDING	GO_AMINO_ACID_BINDING		88	0.363987	1.18107	0.195736	0.601206	1	1156	tags=22%, list=9%, signal=24%
GO_ARACHIDONIC_ACID_METABOLIC_PROCESS	GO_ARACHIDONIC_ACID_METABOLIC_PROCESS		42	0.47641	1.18099	0.259188	0.600471	1	651	tags=26%, list=5%, signal=27%
GO_ALDITOL_PHOSPHATE_METABOLIC_PROCESS	GO_ALDITOL_PHOSPHATE_METABOLIC_PROCESS		24	0.415706	1.18078	0.232932	0.600043	1	1697	tags=29%, list=13%, signal=33%
GO_XENOPHAGY	GO_XENOPHAGY		82	0.29082	1.18052	0.148297	0.599757	1	1560	tags=17%, list=12%, signal=19%
GO_NEGATIVE_REGULATION_OF_JNK_CASCADE	GO_NEGATIVE_REGULATION_OF_JNK_CASCADE		27	0.387196	1.17995	0.222892	0.600223	1	1401	tags=26%, list=11%, signal=29%
GO_REGULATION_OF_CARBOHYDRATE_METABOLIC_PROCESS	GO_REGULATION_OF_CARBOHYDRATE_METABOLIC_PROCESS		135	0.330191	1.17969	0.206166	0.59993	1	2238	tags=29%, list=17%, signal=35%
GO_MITOCHONDRIAL_GENOME_MAINTENANCE	GO_MITOCHONDRIAL_GENOME_MAINTENANCE		15	0.410515	1.17931	0.266667	0.599948	1	2431	tags=40%, list=19%, signal=49%
GO_PROTEIN_KINASE_A_BINDING	GO_PROTEIN_KINASE_A_BINDING		33	0.342924	1.17878	0.214859	0.600405	1	995	tags=18%, list=8%, signal=20%
GO_NEUTRAL_LIPID_CATABOLIC_PROCESS	GO_NEUTRAL_LIPID_CATABOLIC_PROCESS		21	0.514818	1.17816	0.232558	0.60097	1	2312	tags=48%, list=18%, signal=58%
GO_BETA_AMYLOID_BINDING	GO_BETA_AMYLOID_BINDING		29	0.3914	1.17764	0.219282	0.601363	1	3459	tags=52%, list=27%, signal=70%
GO_JNK_CASCADE	GO_JNK_CASCADE		71	0.290257	1.17719	0.183299	0.601575	1	1185	tags=14%, list=9%, signal=15%
GO_LYSOSOMAL_TRANSPORT	GO_LYSOSOMAL_TRANSPORT		52	0.328442	1.17609	0.215292	0.603389	1	1782	tags=23%, list=14%, signal=27%
GO_NEUROTRANSMITTER_METABOLIC_PROCESS	GO_NEUROTRANSMITTER_METABOLIC_PROCESS		21	0.420728	1.17584	0.26975	0.603069	1	2712	tags=38%, list=21%, signal=48%
GO_ANION_TRANSMEMBRANE_TRANSPORTER_ACTIVITY	GO_ANION_TRANSMEMBRANE_TRANSPORTER_ACTIVITY		206	0.318005	1.17574	0.168279	0.602399	1	2208	tags=23%, list=17%, signal=28%
GO_NUCLEOSIDE_PHOSPHATE_BIOSYNTHETIC_PROCESS	GO_NUCLEOSIDE_PHOSPHATE_BIOSYNTHETIC_PROCESS		150	0.287639	1.17571	0.185336	0.601547	1	3115	tags=31%, list=24%, signal=40%
GO_UBIQUITIN_LIKE_PROTEIN_BINDING	GO_UBIQUITIN_LIKE_PROTEIN_BINDING		87	0.323361	1.17554	0.26087	0.601056	1	3725	tags=44%, list=29%, signal=61%
GO_GOLGI_ASSOCIATED_VESICLE	GO_GOLGI_ASSOCIATED_VESICLE		62	0.34235	1.17498	0.267578	0.601516	1	3171	tags=42%, list=24%, signal=55%
GO_REGULATION_OF_HORMONE_LEVELS	GO_REGULATION_OF_HORMONE_LEVELS		401	0.288964	1.17433	0.146881	0.602143	1	2669	tags=26%, list=20%, signal=32%
GO_NEGATIVE_REGULATION_OF_LIPID_BIOSYNTHETIC_PROCESS	GO_NEGATIVE_REGULATION_OF_LIPID_BIOSYNTHETIC_PROCESS		33	0.384155	1.17387	0.213307	0.60236	1	2213	tags=30%, list=17%, signal=36%
GO_CELLULAR_COMPONENT_DISASSEMBLY	GO_CELLULAR_COMPONENT_DISASSEMBLY		396	0.267667	1.17152	0.169072	0.607361	1	1926	tags=21%, list=15%, signal=24%
GO_REGULATION_OF_VACUOLAR_TRANSPORT	GO_REGULATION_OF_VACUOLAR_TRANSPORT		22	0.439982	1.17142	0.280669	0.606704	1	3170	tags=45%, list=24%, signal=60%
GO_NADP_METABOLIC_PROCESS	GO_NADP_METABOLIC_PROCESS		22	0.45756	1.17024	0.259481	0.608871	1	1028	tags=27%, list=8%, signal=30%
GO_REGULATION_OF_ORGANIC_ACID_TRANSPORT	GO_REGULATION_OF_ORGANIC_ACID_TRANSPORT		47	0.353475	1.17019	0.2393	0.608053	1	1341	tags=17%, list=10%, signal=19%
GO_NITROGEN_COMPOUND_TRANSPORT	GO_NITROGEN_COMPOUND_TRANSPORT		389	0.253953	1.17016	0.0898204	0.607222	1	3013	tags=26%, list=23%, signal=33%
GO_NEGATIVE_REGULATION_OF_RESPONSE_TO_OXIDATIVE_STRESS	GO_NEGATIVE_REGULATION_OF_RESPONSE_TO_OXIDATIVE_STRESS		34	0.353877	1.17005	0.207921	0.606567	1	2796	tags=32%, list=21%, signal=41%
GO_TRANSFERASE_ACTIVITY_TRANSFERRING_GLYCOSYL_GROUPS	GO_TRANSFERASE_ACTIVITY_TRANSFERRING_GLYCOSYL_GROUPS		189	0.267204	1.16694	0.157787	0.613538	1	2086	tags=22%, list=16%, signal=26%
GO_RETINOIC_ACID_BINDING	GO_RETINOIC_ACID_BINDING		16	0.520038	1.16635	0.287645	0.614159	1	1976	tags=44%, list=15%, signal=52%
GO_MUSCLE_CELL_CELLULAR_HOMEOSTASIS	GO_MUSCLE_CELL_CELLULAR_HOMEOSTASIS		15	0.437338	1.1662	0.258064	0.613603	1	2068	tags=40%, list=16%, signal=47%
GO_ORGANIC_ANION_TRANSPORT	GO_ORGANIC_ANION_TRANSPORT		292	0.317638	1.1661	0.207843	0.612938	1	2154	tags=24%, list=17%, signal=28%
GO_GLYCEROLIPID_CATABOLIC_PROCESS	GO_GLYCEROLIPID_CATABOLIC_PROCESS		27	0.463194	1.16596	0.248555	0.612384	1	2312	tags=41%, list=18%, signal=49%
GO_REGULATION_OF_CENTROSOME_DUPLICATION	GO_REGULATION_OF_CENTROSOME_DUPLICATION		23	0.377448	1.16556	0.280156	0.61243	1	2753	tags=39%, list=21%, signal=50%
GO_POSITIVE_REGULATION_OF_TOR_SIGNALING	GO_POSITIVE_REGULATION_OF_TOR_SIGNALING		18	0.399424	1.16246	0.254	0.619308	1	2530	tags=33%, list=19%, signal=41%
GO_SULFUR_COMPOUND_CATABOLIC_PROCESS	GO_SULFUR_COMPOUND_CATABOLIC_PROCESS		35	0.423614	1.16226	0.24109	0.618888	1	1235	tags=29%, list=9%, signal=31%
GO_ACIDIC_AMINO_ACID_TRANSPORT	GO_ACIDIC_AMINO_ACID_TRANSPORT		19	0.448389	1.1604	0.255597	0.622611	1	3004	tags=37%, list=23%, signal=48%
GO_RESPONSE_TO_CAMP	GO_RESPONSE_TO_CAMP		97	0.362807	1.15977	0.228682	0.623306	1	702	tags=14%, list=5%, signal=15%
GO_NUCLEIC_ACID_PHOSPHODIESTER_BOND_HYDROLYSIS	GO_NUCLEIC_ACID_PHOSPHODIESTER_BOND_HYDROLYSIS		178	0.315471	1.15969	0.277108	0.622555	1	3535	tags=41%, list=27%, signal=56%
GO_NEGATIVE_REGULATION_OF_CANONICAL_WNT_SIGNALING_PATHWAY	GO_NEGATIVE_REGULATION_OF_CANONICAL_WNT_SIGNALING_PATHWAY		135	0.280699	1.15792	0.219067	0.62611	1	2961	tags=34%, list=23%, signal=44%
GO_PROTON_TRANSPORTING_TWO_SECTOR_ATPASE_COMPLEX_PROTON_TRANSPORTING_DOMAIN	GO_PROTON_TRANSPORTING_TWO_SECTOR_ATPASE_COMPLEX_PROTON_TRANSPORTING_DOMAIN		19	0.389261	1.15791	0.304348	0.625192	1	3394	tags=58%, list=26%, signal=78%
GO_COPI_COATED_VESICLE	GO_COPI_COATED_VESICLE		17	0.499968	1.15522	0.332016	0.631158	1	3093	tags=59%, list=24%, signal=77%
GO_ER_TO_GOLGI_TRANSPORT_VESICLE	GO_ER_TO_GOLGI_TRANSPORT_VESICLE		61	0.383548	1.15454	0.289109	0.631906	1	2596	tags=34%, list=20%, signal=43%
GO_SYNAPSIS	GO_SYNAPSIS		17	0.397558	1.15444	0.277311	0.631234	1	1106	tags=18%, list=8%, signal=19%
GO_ANION_HOMEOSTASIS	GO_ANION_HOMEOSTASIS		36	0.400281	1.15027	0.26938	0.641168	1	3268	tags=53%, list=25%, signal=70%
GO_STEROL_BIOSYNTHETIC_PROCESS	GO_STEROL_BIOSYNTHETIC_PROCESS		39	0.47626	1.15001	0.311284	0.64084	1	1406	tags=31%, list=11%, signal=34%
GO_CELLULAR_TRANSITION_METAL_ION_HOMEOSTASIS	GO_CELLULAR_TRANSITION_METAL_ION_HOMEOSTASIS		59	0.366731	1.14961	0.239766	0.640989	1	2387	tags=32%, list=18%, signal=39%
GO_CLATHRIN_COAT	GO_CLATHRIN_COAT		37	0.345208	1.14945	0.261759	0.640484	1	2112	tags=30%, list=16%, signal=35%
GO_FAT_SOLUBLE_VITAMIN_METABOLIC_PROCESS	GO_FAT_SOLUBLE_VITAMIN_METABOLIC_PROCESS		28	0.435054	1.14922	0.265469	0.640144	1	1045	tags=21%, list=8%, signal=23%
GO_ENDORIBONUCLEASE_ACTIVITY	GO_ENDORIBONUCLEASE_ACTIVITY		37	0.347808	1.14883	0.293204	0.640245	1	3386	tags=41%, list=26%, signal=55%
GO_RESPONSE_TO_TOXIC_SUBSTANCE	GO_RESPONSE_TO_TOXIC_SUBSTANCE		209	0.324616	1.14864	0.219608	0.639813	1	2535	tags=33%, list=19%, signal=40%
GO_RESPONSE_TO_INTERLEUKIN_6	GO_RESPONSE_TO_INTERLEUKIN_6		25	0.448963	1.14763	0.292731	0.641424	1	2878	tags=44%, list=22%, signal=56%
GO_CELLULAR_RESPONSE_TO_STARVATION	GO_CELLULAR_RESPONSE_TO_STARVATION		93	0.31541	1.14602	0.2	0.644584	1	2796	tags=33%, list=21%, signal=42%
GO_MONOVALENT_INORGANIC_CATION_TRANSPORT	GO_MONOVALENT_INORGANIC_CATION_TRANSPORT		324	0.254535	1.14591	0.220503	0.643925	1	3142	tags=27%, list=24%, signal=35%
GO_AMINO_ACID_TRANSMEMBRANE_TRANSPORTER_ACTIVITY	GO_AMINO_ACID_TRANSMEMBRANE_TRANSPORTER_ACTIVITY		55	0.36282	1.14537	0.226488	0.644446	1	1400	tags=22%, list=11%, signal=24%
GO_CARBOHYDRATE_HOMEOSTASIS	GO_CARBOHYDRATE_HOMEOSTASIS		145	0.302653	1.14535	0.213725	0.643555	1	2552	tags=28%, list=20%, signal=35%
GO_REGULATION_OF_HUMORAL_IMMUNE_RESPONSE	GO_REGULATION_OF_HUMORAL_IMMUNE_RESPONSE		45	0.446793	1.14498	0.288577	0.643558	1	1923	tags=31%, list=15%, signal=36%
GO_POSITIVE_REGULATION_OF_EXOCYTOSIS	GO_POSITIVE_REGULATION_OF_EXOCYTOSIS		68	0.296655	1.14486	0.236686	0.642907	1	3265	tags=34%, list=25%, signal=45%
GO_MONOCARBOXYLIC_ACID_TRANSPORT	GO_MONOCARBOXYLIC_ACID_TRANSPORT		95	0.386479	1.1443	0.26616	0.643413	1	2208	tags=29%, list=17%, signal=35%
GO_ENDONUCLEASE_ACTIVITY	GO_ENDONUCLEASE_ACTIVITY		85	0.292084	1.14375	0.252546	0.643897	1	3439	tags=38%, list=26%, signal=51%
GO_REGULATION_OF_ATPASE_ACTIVITY	GO_REGULATION_OF_ATPASE_ACTIVITY		45	0.341171	1.14311	0.243856	0.644602	1	1992	tags=22%, list=15%, signal=26%
GO_RNA_MODIFICATION	GO_RNA_MODIFICATION		63	0.312483	1.14294	0.307368	0.644104	1	3547	tags=35%, list=27%, signal=48%
GO_POSITIVE_REGULATION_OF_DNA_REPAIR	GO_POSITIVE_REGULATION_OF_DNA_REPAIR		30	0.360291	1.14227	0.271605	0.644915	1	2785	tags=30%, list=21%, signal=38%
GO_PALMITOYLTRANSFERASE_ACTIVITY	GO_PALMITOYLTRANSFERASE_ACTIVITY		18	0.445168	1.14108	0.274	0.647178	1	2533	tags=44%, list=19%, signal=55%
GO_RESPONSE_TO_ZINC_ION	GO_RESPONSE_TO_ZINC_ION		44	0.457522	1.13826	0.294574	0.653349	1	1542	tags=36%, list=12%, signal=41%
GO_HORMONE_TRANSPORT	GO_HORMONE_TRANSPORT		63	0.323625	1.13758	0.246063	0.65415	1	2439	tags=27%, list=19%, signal=33%
GO_REGULATION_OF_OXIDATIVE_STRESS_INDUCED_CELL_DEATH	GO_REGULATION_OF_OXIDATIVE_STRESS_INDUCED_CELL_DEATH		43	0.317403	1.1356	0.247082	0.658426	1	2213	tags=26%, list=17%, signal=31%
GO_ANION_TRANSPORT	GO_ANION_TRANSPORT		382	0.293077	1.13556	0.212891	0.657586	1	2208	tags=23%, list=17%, signal=26%
GO_HYPOTHALAMUS_DEVELOPMENT	GO_HYPOTHALAMUS_DEVELOPMENT		21	0.387463	1.13506	0.252988	0.657959	1	1587	tags=19%, list=12%, signal=22%
GO_ONE_CARBON_METABOLIC_PROCESS	GO_ONE_CARBON_METABOLIC_PROCESS		32	0.401448	1.13215	0.284872	0.664665	1	1290	tags=31%, list=10%, signal=35%
GO_PYRIMIDINE_NUCLEOTIDE_METABOLIC_PROCESS	GO_PYRIMIDINE_NUCLEOTIDE_METABOLIC_PROCESS		36	0.361205	1.1319	0.284872	0.664369	1	4142	tags=50%, list=32%, signal=73%
GO_UDP_GLYCOSYLTRANSFERASE_ACTIVITY	GO_UDP_GLYCOSYLTRANSFERASE_ACTIVITY		93	0.294645	1.13172	0.241176	0.663898	1	1235	tags=19%, list=9%, signal=21%
GO_REGULATION_OF_ANION_TRANSPORT	GO_REGULATION_OF_ANION_TRANSPORT		123	0.284186	1.13103	0.264414	0.664736	1	2656	tags=24%, list=20%, signal=30%
GO_RESPONSE_TO_DEXAMETHASONE	GO_RESPONSE_TO_DEXAMETHASONE		28	0.404526	1.13016	0.208589	0.666035	1	1011	tags=25%, list=8%, signal=27%
GO_CATION_TRANSPORTING_ATPASE_ACTIVITY	GO_CATION_TRANSPORTING_ATPASE_ACTIVITY		51	0.321922	1.12966	0.255403	0.666454	1	2168	tags=25%, list=17%, signal=30%
GO_METALLOCARBOXYPEPTIDASE_ACTIVITY	GO_METALLOCARBOXYPEPTIDASE_ACTIVITY		17	0.471005	1.12934	0.292585	0.666341	1	681	tags=29%, list=5%, signal=31%
GO_N_METHYLTRANSFERASE_ACTIVITY	GO_N_METHYLTRANSFERASE_ACTIVITY		56	0.30535	1.12904	0.286807	0.666184	1	3401	tags=32%, list=26%, signal=43%
GO_REGULATION_OF_STEROID_BIOSYNTHETIC_PROCESS	GO_REGULATION_OF_STEROID_BIOSYNTHETIC_PROCESS		42	0.373751	1.12876	0.265504	0.665994	1	1220	tags=19%, list=9%, signal=21%
GO_CELLULAR_RESPONSE_TO_CORTICOSTEROID_STIMULUS	GO_CELLULAR_RESPONSE_TO_CORTICOSTEROID_STIMULUS		48	0.349233	1.12666	0.23374	0.670519	1	1011	tags=19%, list=8%, signal=20%
GO_CELLULAR_RESPONSE_TO_ESTROGEN_STIMULUS	GO_CELLULAR_RESPONSE_TO_ESTROGEN_STIMULUS		33	0.379816	1.12608	0.254473	0.671148	1	2042	tags=27%, list=16%, signal=32%
GO_REGULATION_OF_PROTEIN_STABILITY	GO_REGULATION_OF_PROTEIN_STABILITY		184	0.266699	1.1248	0.227533	0.673635	1	2346	tags=24%, list=18%, signal=29%
GO_RESPONSE_TO_METAL_ION	GO_RESPONSE_TO_METAL_ION		303	0.303094	1.12403	0.210938	0.674772	1	2299	tags=27%, list=18%, signal=32%
GO_PURINE_CONTAINING_COMPOUND_CATABOLIC_PROCESS	GO_PURINE_CONTAINING_COMPOUND_CATABOLIC_PROCESS		41	0.318113	1.12401	0.269531	0.673891	1	3205	tags=37%, list=25%, signal=48%
GO_ORGANOPHOSPHATE_ESTER_TRANSMEMBRANE_TRANSPORTER_ACTIVITY	GO_ORGANOPHOSPHATE_ESTER_TRANSMEMBRANE_TRANSPORTER_ACTIVITY		15	0.421931	1.12099	0.313008	0.680872	1	689	tags=27%, list=5%, signal=28%
GO_RESPONSE_TO_CARBOHYDRATE	GO_RESPONSE_TO_CARBOHYDRATE		151	0.305164	1.12063	0.236328	0.680864	1	1725	tags=23%, list=13%, signal=26%
GO_MANGANESE_ION_BINDING	GO_MANGANESE_ION_BINDING		38	0.340785	1.12056	0.296146	0.680125	1	2410	tags=37%, list=18%, signal=45%
GO_COATED_VESICLE_MEMBRANE	GO_COATED_VESICLE_MEMBRANE		115	0.311319	1.11983	0.289062	0.681079	1	2756	tags=30%, list=21%, signal=37%
GO_ESTROGEN_RECEPTOR_BINDING	GO_ESTROGEN_RECEPTOR_BINDING		33	0.368947	1.11964	0.286598	0.680606	1	1777	tags=30%, list=14%, signal=35%
GO_FOLIC_ACID_CONTAINING_COMPOUND_METABOLIC_PROCESS	GO_FOLIC_ACID_CONTAINING_COMPOUND_METABOLIC_PROCESS		25	0.427113	1.11863	0.313346	0.682329	1	1290	tags=36%, list=10%, signal=40%
GO_GLUTATHIONE_PEROXIDASE_ACTIVITY	GO_GLUTATHIONE_PEROXIDASE_ACTIVITY		15	0.487035	1.11778	0.29666	0.683617	1	2762	tags=53%, list=21%, signal=68%
GO_OXIDOREDUCTASE_ACTIVITY_ACTING_ON_THE_CH_NH2_GROUP_OF_DONORS	GO_OXIDOREDUCTASE_ACTIVITY_ACTING_ON_THE_CH_NH2_GROUP_OF_DONORS		15	0.481026	1.11685	0.280876	0.685108	1	1745	tags=40%, list=13%, signal=46%
GO_AMINO_ACID_TRANSPORT	GO_AMINO_ACID_TRANSPORT		97	0.313436	1.11559	0.242188	0.687588	1	1697	tags=21%, list=13%, signal=24%
GO_REGULATION_OF_LIPID_CATABOLIC_PROCESS	GO_REGULATION_OF_LIPID_CATABOLIC_PROCESS		45	0.358819	1.11557	0.317647	0.68671	1	3150	tags=42%, list=24%, signal=55%
GO_FC_EPSILON_RECEPTOR_SIGNALING_PATHWAY	GO_FC_EPSILON_RECEPTOR_SIGNALING_PATHWAY		117	0.276589	1.11522	0.322772	0.686704	1	3206	tags=35%, list=25%, signal=46%
GO_MACROMITOPHAGY	GO_MACROMITOPHAGY		102	0.255153	1.11503	0.224949	0.686264	1	1912	tags=18%, list=15%, signal=21%
GO_RESPONSE_TO_TRANSITION_METAL_NANOPARTICLE	GO_RESPONSE_TO_TRANSITION_METAL_NANOPARTICLE		130	0.348405	1.11457	0.269903	0.686554	1	1396	tags=22%, list=11%, signal=24%
GO_AMINOPEPTIDASE_ACTIVITY	GO_AMINOPEPTIDASE_ACTIVITY		36	0.355135	1.11361	0.29697	0.688071	1	1767	tags=22%, list=14%, signal=26%
GO_HISTONE_ACETYLTRANSFERASE_BINDING	GO_HISTONE_ACETYLTRANSFERASE_BINDING		26	0.347977	1.10985	0.299213	0.697125	1	3140	tags=42%, list=24%, signal=56%
GO_NEGATIVE_REGULATION_OF_ERK1_AND_ERK2_CASCADE	GO_NEGATIVE_REGULATION_OF_ERK1_AND_ERK2_CASCADE		41	0.382577	1.10962	0.308129	0.696823	1	1464	tags=24%, list=11%, signal=27%
GO_O_ACYLTRANSFERASE_ACTIVITY	GO_O_ACYLTRANSFERASE_ACTIVITY		25	0.400617	1.10935	0.336502	0.696583	1	2312	tags=36%, list=18%, signal=44%
GO_TRANSLATION_FACTOR_ACTIVITY_RNA_BINDING	GO_TRANSLATION_FACTOR_ACTIVITY_RNA_BINDING		57	0.316345	1.10877	0.312369	0.697092	1	2345	tags=30%, list=18%, signal=36%
GO_POSITIVE_REGULATION_OF_OXIDOREDUCTASE_ACTIVITY	GO_POSITIVE_REGULATION_OF_OXIDOREDUCTASE_ACTIVITY		45	0.298221	1.10862	0.280318	0.696519	1	1146	tags=18%, list=9%, signal=19%
GO_TRNA_BINDING	GO_TRNA_BINDING		24	0.355122	1.10799	0.35729	0.697349	1	3838	tags=50%, list=29%, signal=71%
GO_STRUCTURAL_CONSTITUENT_OF_RIBOSOME	GO_STRUCTURAL_CONSTITUENT_OF_RIBOSOME		162	0.250364	1.10685	0.317365	0.69941	1	2131	tags=19%, list=16%, signal=23%
GO_PROTEIN_KINASE_COMPLEX	GO_PROTEIN_KINASE_COMPLEX		75	0.313642	1.10683	0.288344	0.698501	1	1931	tags=24%, list=15%, signal=28%
GO_RESPONSE_TO_LEAD_ION	GO_RESPONSE_TO_LEAD_ION		20	0.388757	1.10677	0.312741	0.697748	1	1998	tags=30%, list=15%, signal=35%
GO_REGULATION_OF_LIPID_BIOSYNTHETIC_PROCESS	GO_REGULATION_OF_LIPID_BIOSYNTHETIC_PROCESS		101	0.327477	1.10673	0.270476	0.696904	1	2610	tags=31%, list=20%, signal=38%
GO_PEPTIDYL_ARGININE_MODIFICATION	GO_PEPTIDYL_ARGININE_MODIFICATION		16	0.371272	1.10506	0.321637	0.700385	1	1640	tags=19%, list=13%, signal=21%
GO_PHENOL_CONTAINING_COMPOUND_METABOLIC_PROCESS	GO_PHENOL_CONTAINING_COMPOUND_METABOLIC_PROCESS		74	0.347207	1.10446	0.312625	0.701123	1	859	tags=16%, list=7%, signal=17%
GO_NEGATIVE_REGULATION_OF_CELLULAR_CATABOLIC_PROCESS	GO_NEGATIVE_REGULATION_OF_CELLULAR_CATABOLIC_PROCESS		124	0.286104	1.10428	0.286869	0.700643	1	2991	tags=32%, list=23%, signal=41%
GO_POST_GOLGI_VESICLE_MEDIATED_TRANSPORT	GO_POST_GOLGI_VESICLE_MEDIATED_TRANSPORT		68	0.294398	1.10401	0.307385	0.700455	1	3509	tags=40%, list=27%, signal=54%
GO_ANTIGEN_PROCESSING_AND_PRESENTATION	GO_ANTIGEN_PROCESSING_AND_PRESENTATION		183	0.312755	1.10391	0.32882	0.69979	1	3006	tags=33%, list=23%, signal=42%
GO_ATPASE_ACTIVITY	GO_ATPASE_ACTIVITY		338	0.26482	1.1033	0.285714	0.700392	1	2210	tags=23%, list=17%, signal=27%
GO_REGULATION_OF_PROTEASOMAL_PROTEIN_CATABOLIC_PROCESS	GO_REGULATION_OF_PROTEASOMAL_PROTEIN_CATABOLIC_PROCESS		147	0.287442	1.10312	0.324649	0.699905	1	3533	tags=39%, list=27%, signal=54%
GO_REGULATION_OF_RELEASE_OF_CYTOCHROME_C_FROM_MITOCHONDRIA	GO_REGULATION_OF_RELEASE_OF_CYTOCHROME_C_FROM_MITOCHONDRIA		38	0.349923	1.10243	0.309569	0.700751	1	3344	tags=39%, list=26%, signal=53%
GO_PROTEIN_SERINE_THREONINE_PHOSPHATASE_ACTIVITY	GO_PROTEIN_SERINE_THREONINE_PHOSPHATASE_ACTIVITY		46	0.300222	1.10152	0.313725	0.702277	1	4268	tags=48%, list=33%, signal=71%
GO_VESICLE_DOCKING	GO_VESICLE_DOCKING		46	0.325771	1.10114	0.309859	0.702312	1	3424	tags=37%, list=26%, signal=50%
GO_POSITIVE_REGULATION_OF_FATTY_ACID_BIOSYNTHETIC_PROCESS	GO_POSITIVE_REGULATION_OF_FATTY_ACID_BIOSYNTHETIC_PROCESS		15	0.462204	1.10085	0.341365	0.702177	1	3268	tags=60%, list=25%, signal=80%
GO_NEGATIVE_REGULATION_OF_CELLULAR_PROTEIN_CATABOLIC_PROCESS	GO_NEGATIVE_REGULATION_OF_CELLULAR_PROTEIN_CATABOLIC_PROCESS		51	0.362726	1.10015	0.358416	0.70316	1	1784	tags=25%, list=14%, signal=29%
GO_NEGATIVE_REGULATION_OF_DEFENSE_RESPONSE_TO_VIRUS	GO_NEGATIVE_REGULATION_OF_DEFENSE_RESPONSE_TO_VIRUS		16	0.428961	1.10012	0.321705	0.702331	1	2272	tags=38%, list=17%, signal=45%
GO_CELLULAR_RESPONSE_TO_DEXAMETHASONE_STIMULUS	GO_CELLULAR_RESPONSE_TO_DEXAMETHASONE_STIMULUS		22	0.405616	1.09887	0.271825	0.704717	1	1542	tags=32%, list=12%, signal=36%
GO_ERROR_FREE_TRANSLESION_SYNTHESIS	GO_ERROR_FREE_TRANSLESION_SYNTHESIS		18	0.459488	1.0987	0.39165	0.704247	1	3417	tags=61%, list=26%, signal=83%
GO_PROTEIN_LOCALIZATION_TO_ORGANELLE	GO_PROTEIN_LOCALIZATION_TO_ORGANELLE		455	0.229992	1.09863	0.274354	0.703501	1	2217	tags=20%, list=17%, signal=23%
GO_POSITIVE_REGULATION_OF_NUCLEOSIDE_METABOLIC_PROCESS	GO_POSITIVE_REGULATION_OF_NUCLEOSIDE_METABOLIC_PROCESS		22	0.426607	1.09837	0.357955	0.703253	1	2552	tags=32%, list=20%, signal=39%
GO_PROTEIN_N_TERMINUS_BINDING	GO_PROTEIN_N_TERMINUS_BINDING		95	0.280673	1.09819	0.293388	0.702821	1	3629	tags=35%, list=28%, signal=48%
GO_LIVER_REGENERATION	GO_LIVER_REGENERATION		17	0.454234	1.09788	0.364162	0.702756	1	1896	tags=41%, list=15%, signal=48%
GO_HORMONE_RECEPTOR_BINDING	GO_HORMONE_RECEPTOR_BINDING		131	0.262615	1.0974	0.288889	0.703072	1	3373	tags=34%, list=26%, signal=45%
GO_LIPID_BINDING	GO_LIPID_BINDING		468	0.262386	1.09706	0.24283	0.703026	1	2649	tags=26%, list=20%, signal=31%
GO_UBIQUITIN_LIKE_PROTEIN_TRANSFERASE_ACTIVITY	GO_UBIQUITIN_LIKE_PROTEIN_TRANSFERASE_ACTIVITY		259	0.263893	1.09667	0.312377	0.703148	1	3285	tags=32%, list=25%, signal=41%
GO_POSITIVE_REGULATION_OF_AMINE_TRANSPORT	GO_POSITIVE_REGULATION_OF_AMINE_TRANSPORT		31	0.381048	1.09652	0.340594	0.702593	1	1490	tags=19%, list=11%, signal=22%
GO_ESTABLISHMENT_OF_PROTEIN_LOCALIZATION_TO_ORGANELLE	GO_ESTABLISHMENT_OF_PROTEIN_LOCALIZATION_TO_ORGANELLE		308	0.231317	1.09615	0.286837	0.702594	1	3220	tags=28%, list=25%, signal=36%
GO_RNA_POLYMERASE_BINDING	GO_RNA_POLYMERASE_BINDING		28	0.353124	1.09594	0.345489	0.702259	1	3552	tags=39%, list=27%, signal=54%
GO_CELLULAR_RESPONSE_TO_INTERLEUKIN_6	GO_CELLULAR_RESPONSE_TO_INTERLEUKIN_6		21	0.425964	1.09581	0.332068	0.701688	1	2878	tags=48%, list=22%, signal=61%
GO_CARBOHYDRATE_KINASE_ACTIVITY	GO_CARBOHYDRATE_KINASE_ACTIVITY		19	0.440759	1.09574	0.32	0.700971	1	1513	tags=37%, list=12%, signal=42%
GO_REGULATION_OF_GENERATION_OF_PRECURSOR_METABOLITES_AND_ENERGY	GO_REGULATION_OF_GENERATION_OF_PRECURSOR_METABOLITES_AND_ENERGY		72	0.32101	1.0947	0.327485	0.702749	1	2860	tags=35%, list=22%, signal=44%
GO_PROTEIN_ALKYLATION	GO_PROTEIN_ALKYLATION		81	0.2806	1.09426	0.316	0.702974	1	2301	tags=21%, list=18%, signal=25%
GO_STRESS_ACTIVATED_PROTEIN_KINASE_SIGNALING_CASCADE	GO_STRESS_ACTIVATED_PROTEIN_KINASE_SIGNALING_CASCADE		88	0.269272	1.09418	0.311111	0.702259	1	1283	tags=15%, list=10%, signal=16%
GO_PROTEIN_LOCALIZATION_TO_GOLGI_APPARATUS	GO_PROTEIN_LOCALIZATION_TO_GOLGI_APPARATUS		25	0.359707	1.09407	0.354508	0.7016	1	3185	tags=48%, list=24%, signal=63%
GO_ANTIGEN_PROCESSING_AND_PRESENTATION_OF_PEPTIDE_ANTIGEN	GO_ANTIGEN_PROCESSING_AND_PRESENTATION_OF_PEPTIDE_ANTIGEN		155	0.318305	1.09399	0.341699	0.700877	1	2961	tags=33%, list=23%, signal=42%
GO_REGULATION_OF_CELLULAR_RESPONSE_TO_HEAT	GO_REGULATION_OF_CELLULAR_RESPONSE_TO_HEAT		69	0.351318	1.09321	0.342629	0.702016	1	4073	tags=48%, list=31%, signal=69%
GO_PIGMENT_METABOLIC_PROCESS	GO_PIGMENT_METABOLIC_PROCESS		52	0.342305	1.09128	0.321637	0.706159	1	2916	tags=38%, list=22%, signal=49%
GO_RESPONSE_TO_LEPTIN	GO_RESPONSE_TO_LEPTIN		17	0.417753	1.09067	0.340681	0.706876	1	2656	tags=47%, list=20%, signal=59%
GO_GLYCEROPHOSPHOLIPID_METABOLIC_PROCESS	GO_GLYCEROPHOSPHOLIPID_METABOLIC_PROCESS		209	0.248884	1.09056	0.254753	0.706223	1	1955	tags=21%, list=15%, signal=24%
GO_TRANSFERASE_ACTIVITY_TRANSFERRING_HEXOSYL_GROUPS	GO_TRANSFERASE_ACTIVITY_TRANSFERRING_HEXOSYL_GROUPS		135	0.272282	1.09045	0.265432	0.705604	1	1556	tags=19%, list=12%, signal=22%
GO_RESPONSE_TO_ARSENIC_CONTAINING_SUBSTANCE	GO_RESPONSE_TO_ARSENIC_CONTAINING_SUBSTANCE		24	0.422674	1.09011	0.335849	0.705568	1	2916	tags=54%, list=22%, signal=70%
GO_REGULATION_OF_ICOSANOID_SECRETION	GO_REGULATION_OF_ICOSANOID_SECRETION		20	0.385831	1.08965	0.307544	0.705896	1	1341	tags=20%, list=10%, signal=22%
GO_MONOCARBOXYLIC_ACID_BINDING	GO_MONOCARBOXYLIC_ACID_BINDING		54	0.374925	1.08838	0.348659	0.708401	1	2206	tags=35%, list=17%, signal=42%
GO_BLOOD_COAGULATION_FIBRIN_CLOT_FORMATION	GO_BLOOD_COAGULATION_FIBRIN_CLOT_FORMATION		25	0.457708	1.08823	0.389535	0.707938	1	3124	tags=60%, list=24%, signal=79%
GO_INTRAMOLECULAR_TRANSFERASE_ACTIVITY	GO_INTRAMOLECULAR_TRANSFERASE_ACTIVITY		17	0.391023	1.08656	0.323171	0.71147	1	1876	tags=35%, list=14%, signal=41%
GO_ANION_TRANSMEMBRANE_TRANSPORT	GO_ANION_TRANSMEMBRANE_TRANSPORT		175	0.295854	1.08549	0.301741	0.713439	1	2208	tags=23%, list=17%, signal=27%
GO_REGULATION_OF_RESPONSE_TO_EXTRACELLULAR_STIMULUS	GO_REGULATION_OF_RESPONSE_TO_EXTRACELLULAR_STIMULUS		138	0.25934	1.08463	0.300601	0.714646	1	2860	tags=27%, list=22%, signal=34%
GO_CELLULAR_MONOVALENT_INORGANIC_CATION_HOMEOSTASIS	GO_CELLULAR_MONOVALENT_INORGANIC_CATION_HOMEOSTASIS		77	0.281119	1.08416	0.347059	0.714952	1	2273	tags=23%, list=17%, signal=28%
GO_PROTEIN_TARGETING	GO_PROTEIN_TARGETING		343	0.229345	1.08327	0.314342	0.716396	1	3220	tags=27%, list=25%, signal=35%
GO_SNARE_BINDING	GO_SNARE_BINDING		83	0.297652	1.08233	0.330578	0.717897	1	3278	tags=39%, list=25%, signal=51%
GO_PURINE_CONTAINING_COMPOUND_BIOSYNTHETIC_PROCESS	GO_PURINE_CONTAINING_COMPOUND_BIOSYNTHETIC_PROCESS		118	0.25937	1.08233	0.298781	0.716991	1	2229	tags=21%, list=17%, signal=25%
GO_REGULATION_OF_PLASMA_LIPOPROTEIN_PARTICLE_LEVELS	GO_REGULATION_OF_PLASMA_LIPOPROTEIN_PARTICLE_LEVELS		40	0.400592	1.082	0.346979	0.716994	1	2913	tags=40%, list=22%, signal=51%
GO_SECRETORY_GRANULE_MEMBRANE	GO_SECRETORY_GRANULE_MEMBRANE		60	0.33415	1.08187	0.34608	0.716382	1	1838	tags=20%, list=14%, signal=23%
GO_RESPONSE_TO_TESTOSTERONE	GO_RESPONSE_TO_TESTOSTERONE		36	0.360551	1.0818	0.316667	0.715655	1	1227	tags=17%, list=9%, signal=18%
GO_WNT_SIGNALING_PATHWAY_CALCIUM_MODULATING_PATHWAY	GO_WNT_SIGNALING_PATHWAY_CALCIUM_MODULATING_PATHWAY		35	0.325473	1.08098	0.345098	0.716979	1	2269	tags=29%, list=17%, signal=35%
GO_NEGATIVE_REGULATION_OF_CATABOLIC_PROCESS	GO_NEGATIVE_REGULATION_OF_CATABOLIC_PROCESS		159	0.265275	1.08042	0.298387	0.717545	1	2832	tags=31%, list=22%, signal=40%
GO_REGULATION_OF_FATTY_ACID_OXIDATION	GO_REGULATION_OF_FATTY_ACID_OXIDATION		22	0.468174	1.07985	0.354406	0.718124	1	1884	tags=45%, list=14%, signal=53%
GO_PHOSPHATIDYLINOSITOL_BIOSYNTHETIC_PROCESS	GO_PHOSPHATIDYLINOSITOL_BIOSYNTHETIC_PROCESS		92	0.26184	1.07902	0.324165	0.719364	1	2784	tags=30%, list=21%, signal=38%
GO_PIGMENT_GRANULE_ORGANIZATION	GO_PIGMENT_GRANULE_ORGANIZATION		15	0.449661	1.07804	0.360444	0.721069	1	935	tags=27%, list=7%, signal=29%
GO_NEGATIVE_REGULATION_OF_PROTEOLYSIS	GO_NEGATIVE_REGULATION_OF_PROTEOLYSIS		252	0.294187	1.07782	0.278884	0.720791	1	1946	tags=24%, list=15%, signal=28%
GO_INTRINSIC_APOPTOTIC_SIGNALING_PATHWAY	GO_INTRINSIC_APOPTOTIC_SIGNALING_PATHWAY		128	0.298481	1.07758	0.344358	0.720519	1	2341	tags=29%, list=18%, signal=35%
GO_REGULATION_OF_LIPID_TRANSPORT	GO_REGULATION_OF_LIPID_TRANSPORT		84	0.293367	1.07744	0.358974	0.719951	1	2845	tags=29%, list=22%, signal=36%
GO_GOLGI_STACK	GO_GOLGI_STACK		92	0.299506	1.07692	0.355212	0.720415	1	2205	tags=26%, list=17%, signal=31%
GO_AMIDE_BINDING	GO_AMIDE_BINDING		233	0.270635	1.07639	0.321705	0.720912	1	2130	tags=21%, list=16%, signal=24%
GO_MISMATCH_REPAIR	GO_MISMATCH_REPAIR		27	0.433266	1.07609	0.404339	0.720786	1	2153	tags=33%, list=17%, signal=40%
GO_NEGATIVE_REGULATION_OF_LIPID_TRANSPORT	GO_NEGATIVE_REGULATION_OF_LIPID_TRANSPORT		25	0.354572	1.07539	0.349328	0.721727	1	2749	tags=36%, list=21%, signal=46%
GO_REGULATION_OF_MITOCHONDRION_ORGANIZATION	GO_REGULATION_OF_MITOCHONDRION_ORGANIZATION		158	0.267368	1.07343	0.331361	0.725903	1	3206	tags=34%, list=25%, signal=44%
GO_REGULATION_OF_NUCLEASE_ACTIVITY	GO_REGULATION_OF_NUCLEASE_ACTIVITY		21	0.377314	1.07309	0.385542	0.72594	1	3386	tags=43%, list=26%, signal=58%
GO_REGULATION_OF_RESPONSE_TO_INTERFERON_GAMMA	GO_REGULATION_OF_RESPONSE_TO_INTERFERON_GAMMA		19	0.390918	1.07276	0.364892	0.725848	1	2845	tags=42%, list=22%, signal=54%
GO_REGULATION_OF_CELLULAR_PH	GO_REGULATION_OF_CELLULAR_PH		58	0.295726	1.07204	0.349515	0.726757	1	2273	tags=26%, list=17%, signal=31%
GO_MITOCHONDRIAL_MEMBRANE_ORGANIZATION	GO_MITOCHONDRIAL_MEMBRANE_ORGANIZATION		74	0.284881	1.07176	0.348	0.726586	1	3034	tags=32%, list=23%, signal=42%
GO_CELLULAR_RESPONSE_TO_AMINO_ACID_STARVATION	GO_CELLULAR_RESPONSE_TO_AMINO_ACID_STARVATION		18	0.386323	1.07152	0.361963	0.726327	1	2530	tags=44%, list=19%, signal=55%
GO_LACTATION	GO_LACTATION		37	0.32977	1.07084	0.325536	0.72716	1	732	tags=14%, list=6%, signal=14%
GO_RIBOSOME	GO_RIBOSOME		171	0.259494	1.06888	0.366397	0.731438	1	1890	tags=19%, list=15%, signal=22%
GO_RESPONSE_TO_EXTRACELLULAR_STIMULUS	GO_RESPONSE_TO_EXTRACELLULAR_STIMULUS		384	0.268646	1.0687	0.304878	0.731014	1	2805	tags=29%, list=22%, signal=36%
GO_ER_TO_GOLGI_TRANSPORT_VESICLE_MEMBRANE	GO_ER_TO_GOLGI_TRANSPORT_VESICLE_MEMBRANE		47	0.371915	1.06758	0.385214	0.7331	1	2566	tags=32%, list=20%, signal=40%
GO_MEMBRANE_LIPID_CATABOLIC_PROCESS	GO_MEMBRANE_LIPID_CATABOLIC_PROCESS		20	0.363212	1.06658	0.382178	0.734883	1	1235	tags=25%, list=9%, signal=28%
GO_NUCLEOTIDYLTRANSFERASE_ACTIVITY	GO_NUCLEOTIDYLTRANSFERASE_ACTIVITY		93	0.305379	1.06599	0.383367	0.735489	1	2178	tags=29%, list=17%, signal=35%
GO_MYD88_DEPENDENT_TOLL_LIKE_RECEPTOR_SIGNALING_PATHWAY	GO_MYD88_DEPENDENT_TOLL_LIKE_RECEPTOR_SIGNALING_PATHWAY		24	0.372704	1.06578	0.371257	0.73515	1	1457	tags=21%, list=11%, signal=23%
GO_NUCLEOTIDE_EXCISION_REPAIR_PREINCISION_COMPLEX_ASSEMBLY	GO_NUCLEOTIDE_EXCISION_REPAIR_PREINCISION_COMPLEX_ASSEMBLY		29	0.360211	1.06292	0.398406	0.741826	1	1747	tags=24%, list=13%, signal=28%
GO_ACTIVATION_OF_PROTEIN_KINASE_B_ACTIVITY	GO_ACTIVATION_OF_PROTEIN_KINASE_B_ACTIVITY		20	0.372145	1.06246	0.384158	0.742124	1	1023	tags=15%, list=8%, signal=16%
GO_OLIGODENDROCYTE_DEVELOPMENT	GO_OLIGODENDROCYTE_DEVELOPMENT		29	0.32404	1.06232	0.372745	0.741604	1	1578	tags=24%, list=12%, signal=27%
GO_MEMBRANE_FUSION	GO_MEMBRANE_FUSION		104	0.270467	1.06218	0.353659	0.741011	1	3054	tags=35%, list=23%, signal=45%
GO_POSITIVE_REGULATION_OF_TRANSPORTER_ACTIVITY	GO_POSITIVE_REGULATION_OF_TRANSPORTER_ACTIVITY		62	0.283753	1.06196	0.335294	0.740678	1	1074	tags=13%, list=8%, signal=14%
GO_POSITIVE_REGULATION_OF_HISTONE_METHYLATION	GO_POSITIVE_REGULATION_OF_HISTONE_METHYLATION		28	0.342443	1.06094	0.391389	0.742575	1	2213	tags=29%, list=17%, signal=34%
GO_ANTIGEN_PROCESSING_AND_PRESENTATION_OF_EXOGENOUS_PEPTIDE_ANTIGEN_VIA_MHC_CLASS_I	GO_ANTIGEN_PROCESSING_AND_PRESENTATION_OF_EXOGENOUS_PEPTIDE_ANTIGEN_VIA_MHC_CLASS_I		63	0.347986	1.05937	0.410101	0.745728	1	3316	tags=44%, list=25%, signal=59%
GO_CATECHOLAMINE_METABOLIC_PROCESS	GO_CATECHOLAMINE_METABOLIC_PROCESS		39	0.354402	1.05937	0.363273	0.744843	1	2098	tags=28%, list=16%, signal=34%
GO_ORGANIC_CATION_TRANSPORT	GO_ORGANIC_CATION_TRANSPORT		17	0.450119	1.05893	0.392927	0.745083	1	1304	tags=24%, list=10%, signal=26%
GO_REGULATION_OF_TOR_SIGNALING	GO_REGULATION_OF_TOR_SIGNALING		42	0.304196	1.0588	0.365854	0.744484	1	2530	tags=31%, list=19%, signal=38%
GO_NEGATIVE_REGULATION_OF_PROTEIN_MATURATION	GO_NEGATIVE_REGULATION_OF_PROTEIN_MATURATION		28	0.398849	1.05743	0.373796	0.747279	1	3996	tags=57%, list=31%, signal=82%
GO_INCLUSION_BODY	GO_INCLUSION_BODY		54	0.303944	1.05667	0.370656	0.748403	1	2422	tags=26%, list=19%, signal=32%
GO_ACTIVATION_OF_MAPKK_ACTIVITY	GO_ACTIVATION_OF_MAPKK_ACTIVITY		46	0.290971	1.0566	0.371542	0.747686	1	2386	tags=24%, list=18%, signal=29%
GO_GLUCURONOSYLTRANSFERASE_ACTIVITY	GO_GLUCURONOSYLTRANSFERASE_ACTIVITY		19	0.461209	1.05594	0.416503	0.748516	1	1215	tags=37%, list=9%, signal=41%
GO_COPPER_ION_TRANSPORT	GO_COPPER_ION_TRANSPORT		16	0.438055	1.05569	0.394683	0.748259	1	2888	tags=50%, list=22%, signal=64%
GO_PEPTIDASE_ACTIVITY	GO_PEPTIDASE_ACTIVITY		438	0.245722	1.05502	0.326446	0.749139	1	2802	tags=27%, list=21%, signal=33%
GO_GDP_BINDING	GO_GDP_BINDING		42	0.33726	1.05239	0.360236	0.755213	1	3708	tags=50%, list=28%, signal=70%
GO_REGULATION_OF_SODIUM_ION_TRANSMEMBRANE_TRANSPORTER_ACTIVITY	GO_REGULATION_OF_SODIUM_ION_TRANSMEMBRANE_TRANSPORTER_ACTIVITY		32	0.340461	1.05221	0.344168	0.754763	1	1980	tags=22%, list=15%, signal=26%
GO_CATECHOLAMINE_BIOSYNTHETIC_PROCESS	GO_CATECHOLAMINE_BIOSYNTHETIC_PROCESS		18	0.429689	1.0501	0.381526	0.759394	1	1384	tags=28%, list=11%, signal=31%
GO_MAP_KINASE_KINASE_KINASE_ACTIVITY	GO_MAP_KINASE_KINASE_KINASE_ACTIVITY		21	0.363644	1.04993	0.366599	0.758932	1	2386	tags=33%, list=18%, signal=41%
GO_NUCLEOTIDE_EXCISION_REPAIR_DNA_INCISION	GO_NUCLEOTIDE_EXCISION_REPAIR_DNA_INCISION		37	0.37696	1.04931	0.418367	0.759667	1	2873	tags=41%, list=22%, signal=52%
GO_CELLULAR_PROTEIN_COMPLEX_ASSEMBLY	GO_CELLULAR_PROTEIN_COMPLEX_ASSEMBLY		262	0.237497	1.04889	0.35259	0.759878	1	2922	tags=27%, list=22%, signal=35%
GO_MONOSACCHARIDE_TRANSPORT	GO_MONOSACCHARIDE_TRANSPORT		43	0.333463	1.04818	0.352941	0.760875	1	947	tags=16%, list=7%, signal=17%
GO_CARBOHYDRATE_DERIVATIVE_TRANSPORTER_ACTIVITY	GO_CARBOHYDRATE_DERIVATIVE_TRANSPORTER_ACTIVITY		24	0.36121	1.04817	0.387097	0.760005	1	2738	tags=38%, list=21%, signal=47%
GO_INTRACELLULAR_STEROID_HORMONE_RECEPTOR_SIGNALING_PATHWAY	GO_INTRACELLULAR_STEROID_HORMONE_RECEPTOR_SIGNALING_PATHWAY		53	0.299345	1.04772	0.366197	0.760351	1	1859	tags=23%, list=14%, signal=26%
GO_CYCLIN_DEPENDENT_PROTEIN_KINASE_ACTIVITY	GO_CYCLIN_DEPENDENT_PROTEIN_KINASE_ACTIVITY		20	0.37368	1.04718	0.395918	0.760904	1	472	tags=10%, list=4%, signal=10%
GO_TRANSCRIPTIONALLY_ACTIVE_CHROMATIN	GO_TRANSCRIPTIONALLY_ACTIVE_CHROMATIN		16	0.397954	1.04567	0.401623	0.763924	1	2487	tags=38%, list=19%, signal=46%
GO_POSITIVE_REGULATION_OF_MULTI_ORGANISM_PROCESS	GO_POSITIVE_REGULATION_OF_MULTI_ORGANISM_PROCESS		135	0.23769	1.0439	0.376923	0.767744	1	2094	tags=20%, list=16%, signal=24%
GO_OXYGEN_BINDING	GO_OXYGEN_BINDING		41	0.418812	1.0437	0.40404	0.767375	1	702	tags=22%, list=5%, signal=23%
GO_TETRAHYDROFOLATE_METABOLIC_PROCESS	GO_TETRAHYDROFOLATE_METABOLIC_PROCESS		18	0.405913	1.04227	0.414141	0.770259	1	1840	tags=39%, list=14%, signal=45%
GO_CARBOHYDRATE_DERIVATIVE_BIOSYNTHETIC_PROCESS	GO_CARBOHYDRATE_DERIVATIVE_BIOSYNTHETIC_PROCESS		442	0.22346	1.04178	0.342685	0.77064	1	2229	tags=21%, list=17%, signal=25%
GO_PROTEIN_ACYLATION	GO_PROTEIN_ACYLATION		97	0.264114	1.04142	0.376238	0.770686	1	3309	tags=32%, list=25%, signal=43%
GO_ISOPRENOID_BINDING	GO_ISOPRENOID_BINDING		27	0.403549	1.04135	0.404339	0.769947	1	2441	tags=41%, list=19%, signal=50%
GO_TRANSFERASE_COMPLEX	GO_TRANSFERASE_COMPLEX		481	0.256669	1.04083	0.394	0.770456	1	3446	tags=33%, list=26%, signal=44%
GO_CELLULAR_RESPONSE_TO_STEROID_HORMONE_STIMULUS	GO_CELLULAR_RESPONSE_TO_STEROID_HORMONE_STIMULUS		179	0.253506	1.04009	0.387914	0.771433	1	3429	tags=34%, list=26%, signal=45%
GO_HEAT_SHOCK_PROTEIN_BINDING	GO_HEAT_SHOCK_PROTEIN_BINDING		77	0.293023	1.0393	0.41498	0.772598	1	4021	tags=48%, list=31%, signal=69%
GO_POSITIVE_REGULATION_OF_VIRAL_GENOME_REPLICATION	GO_POSITIVE_REGULATION_OF_VIRAL_GENOME_REPLICATION		29	0.339735	1.03812	0.415663	0.774735	1	1408	tags=21%, list=11%, signal=23%
GO_PROTEIN_MODIFICATION_BY_SMALL_PROTEIN_REMOVAL	GO_PROTEIN_MODIFICATION_BY_SMALL_PROTEIN_REMOVAL		81	0.25973	1.03707	0.395062	0.776673	1	3448	tags=33%, list=26%, signal=45%
GO_HORMONE_MEDIATED_SIGNALING_PATHWAY	GO_HORMONE_MEDIATED_SIGNALING_PATHWAY		132	0.247874	1.03671	0.38015	0.776773	1	3429	tags=33%, list=26%, signal=45%
GO_POSITIVE_REGULATION_OF_RELEASE_OF_CYTOCHROME_C_FROM_MITOCHONDRIA	GO_POSITIVE_REGULATION_OF_RELEASE_OF_CYTOCHROME_C_FROM_MITOCHONDRIA		23	0.38782	1.03633	0.40568	0.776892	1	682	tags=17%, list=5%, signal=18%
GO_GLYCOSYLATION	GO_GLYCOSYLATION		181	0.243377	1.03612	0.352941	0.7765	1	2275	tags=24%, list=17%, signal=28%
GO_APICAL_PLASMA_MEMBRANE	GO_APICAL_PLASMA_MEMBRANE		234	0.273668	1.03605	0.340782	0.775796	1	2223	tags=22%, list=17%, signal=26%
GO_GLYCOSPHINGOLIPID_METABOLIC_PROCESS	GO_GLYCOSPHINGOLIPID_METABOLIC_PROCESS		53	0.287325	1.03474	0.394286	0.778342	1	1982	tags=23%, list=15%, signal=27%
GO_PITUITARY_GLAND_DEVELOPMENT	GO_PITUITARY_GLAND_DEVELOPMENT		35	0.332019	1.03472	0.413174	0.777473	1	670	tags=11%, list=5%, signal=12%
GO_REACTIVE_OXYGEN_SPECIES_METABOLIC_PROCESS	GO_REACTIVE_OXYGEN_SPECIES_METABOLIC_PROCESS		82	0.326899	1.03453	0.388	0.777101	1	2473	tags=30%, list=19%, signal=37%
GO_AMINO_ACID_TRANSMEMBRANE_TRANSPORT	GO_AMINO_ACID_TRANSMEMBRANE_TRANSPORT		44	0.346697	1.03366	0.408397	0.778529	1	1400	tags=20%, list=11%, signal=23%
GO_MONOAMINE_TRANSPORT	GO_MONOAMINE_TRANSPORT		20	0.347403	1.03314	0.405797	0.779028	1	245	tags=10%, list=2%, signal=10%
GO_PROTEIN_TRIMERIZATION	GO_PROTEIN_TRIMERIZATION		30	0.341189	1.0331	0.396378	0.778244	1	1885	tags=17%, list=14%, signal=19%
GO_CLATHRIN_BINDING	GO_CLATHRIN_BINDING		40	0.284554	1.03169	0.400406	0.781147	1	2756	tags=28%, list=21%, signal=35%
GO_BASOLATERAL_PLASMA_MEMBRANE	GO_BASOLATERAL_PLASMA_MEMBRANE		174	0.273374	1.03118	0.366795	0.781592	1	2024	tags=19%, list=16%, signal=22%
GO_TRANSFERASE_COMPLEX_TRANSFERRING_PHOSPHORUS_CONTAINING_GROUPS	GO_TRANSFERASE_COMPLEX_TRANSFERRING_PHOSPHORUS_CONTAINING_GROUPS		185	0.271947	1.03113	0.41358	0.780803	1	3635	tags=40%, list=28%, signal=55%
GO_NEGATIVE_REGULATION_OF_RESPONSE_TO_BIOTIC_STIMULUS	GO_NEGATIVE_REGULATION_OF_RESPONSE_TO_BIOTIC_STIMULUS		25	0.349489	1.0282	0.37451	0.787687	1	2499	tags=32%, list=19%, signal=40%
GO_REGULATION_OF_VACUOLE_ORGANIZATION	GO_REGULATION_OF_VACUOLE_ORGANIZATION		28	0.31596	1.02816	0.381633	0.786899	1	1738	tags=25%, list=13%, signal=29%
GO_NEURON_APOPTOTIC_PROCESS	GO_NEURON_APOPTOTIC_PROCESS		29	0.331838	1.02814	0.399614	0.786051	1	1637	tags=28%, list=13%, signal=31%
GO_APOPTOTIC_MITOCHONDRIAL_CHANGES	GO_APOPTOTIC_MITOCHONDRIAL_CHANGES		49	0.313418	1.02771	0.418426	0.786277	1	2610	tags=33%, list=20%, signal=41%
GO_VACUOLE_FUSION	GO_VACUOLE_FUSION		16	0.366995	1.02742	0.424419	0.786124	1	3509	tags=50%, list=27%, signal=68%
GO_GLUCOSE_6_PHOSPHATE_METABOLIC_PROCESS	GO_GLUCOSE_6_PHOSPHATE_METABOLIC_PROCESS		19	0.40292	1.02731	0.420744	0.785513	1	2293	tags=42%, list=18%, signal=51%
GO_CARBOHYDRATE_DERIVATIVE_CATABOLIC_PROCESS	GO_CARBOHYDRATE_DERIVATIVE_CATABOLIC_PROCESS		143	0.260627	1.02627	0.381238	0.787351	1	1526	tags=19%, list=12%, signal=21%
GO_MEMBRANE_BIOGENESIS	GO_MEMBRANE_BIOGENESIS		28	0.346712	1.02559	0.418386	0.788283	1	1579	tags=21%, list=12%, signal=24%
GO_DOPAMINE_METABOLIC_PROCESS	GO_DOPAMINE_METABOLIC_PROCESS		25	0.367292	1.0252	0.416162	0.788464	1	1994	tags=28%, list=15%, signal=33%
GO_UBIQUITIN_LIKE_PROTEIN_CONJUGATING_ENZYME_ACTIVITY	GO_UBIQUITIN_LIKE_PROTEIN_CONJUGATING_ENZYME_ACTIVITY		21	0.372935	1.02473	0.45082	0.7888	1	3113	tags=48%, list=24%, signal=62%
GO_GUANYL_NUCLEOTIDE_BINDING	GO_GUANYL_NUCLEOTIDE_BINDING		258	0.242056	1.02399	0.379447	0.789832	1	2379	tags=22%, list=18%, signal=26%
GO_REGULATION_OF_SYSTEMIC_ARTERIAL_BLOOD_PRESSURE_BY_RENIN_ANGIOTENSIN	GO_REGULATION_OF_SYSTEMIC_ARTERIAL_BLOOD_PRESSURE_BY_RENIN_ANGIOTENSIN		21	0.397426	1.02349	0.418838	0.790236	1	2596	tags=33%, list=20%, signal=42%
GO_L_AMINO_ACID_TRANSPORT	GO_L_AMINO_ACID_TRANSPORT		43	0.3132	1.02344	0.433145	0.789467	1	3187	tags=37%, list=24%, signal=49%
GO_RESPONSE_TO_PURINE_CONTAINING_COMPOUND	GO_RESPONSE_TO_PURINE_CONTAINING_COMPOUND		146	0.28805	1.02338	0.393762	0.788743	1	1341	tags=16%, list=10%, signal=18%
GO_POSITIVE_REGULATION_OF_PROTEASOMAL_PROTEIN_CATABOLIC_PROCESS	GO_POSITIVE_REGULATION_OF_PROTEASOMAL_PROTEIN_CATABOLIC_PROCESS		76	0.261184	1.02287	0.422701	0.789179	1	3448	tags=41%, list=26%, signal=55%
GO_COP9_SIGNALOSOME	GO_COP9_SIGNALOSOME		30	0.307698	1.02195	0.444672	0.790727	1	2035	tags=23%, list=16%, signal=28%
GO_STEROID_HORMONE_MEDIATED_SIGNALING_PATHWAY	GO_STEROID_HORMONE_MEDIATED_SIGNALING_PATHWAY		102	0.258942	1.02175	0.390385	0.790342	1	3429	tags=35%, list=26%, signal=48%
GO_RENAL_WATER_HOMEOSTASIS	GO_RENAL_WATER_HOMEOSTASIS		31	0.326256	1.0216	0.419802	0.789835	1	588	tags=13%, list=5%, signal=13%
GO_CELLULAR_RESPONSE_TO_FLUID_SHEAR_STRESS	GO_CELLULAR_RESPONSE_TO_FLUID_SHEAR_STRESS		19	0.387024	1.02127	0.437882	0.78979	1	1725	tags=32%, list=13%, signal=36%
GO_NUCLEOBASE_CONTAINING_COMPOUND_KINASE_ACTIVITY	GO_NUCLEOBASE_CONTAINING_COMPOUND_KINASE_ACTIVITY		34	0.303627	1.02124	0.425403	0.788959	1	2311	tags=18%, list=18%, signal=21%
GO_ACUTE_INFLAMMATORY_RESPONSE	GO_ACUTE_INFLAMMATORY_RESPONSE		63	0.359445	1.02121	0.417671	0.788153	1	2641	tags=37%, list=20%, signal=46%
GO_SYNTAXIN_BINDING	GO_SYNTAXIN_BINDING		58	0.29139	1.02007	0.434343	0.790304	1	2618	tags=31%, list=20%, signal=39%
GO_NUCLEAR_TRANSCRIBED_MRNA_CATABOLIC_PROCESS_EXONUCLEOLYTIC	GO_NUCLEAR_TRANSCRIBED_MRNA_CATABOLIC_PROCESS_EXONUCLEOLYTIC		24	0.371538	1.01787	0.428858	0.795241	1	2892	tags=38%, list=22%, signal=48%
GO_RNA_PHOSPHODIESTER_BOND_HYDROLYSIS_ENDONUCLEOLYTIC	GO_RNA_PHOSPHODIESTER_BOND_HYDROLYSIS_ENDONUCLEOLYTIC		44	0.30993	1.0177	0.426036	0.794797	1	3386	tags=39%, list=26%, signal=52%
GO_REGULATION_OF_MEIOTIC_NUCLEAR_DIVISION	GO_REGULATION_OF_MEIOTIC_NUCLEAR_DIVISION		24	0.371335	1.01682	0.4375	0.796275	1	2153	tags=25%, list=17%, signal=30%
GO_REACTIVE_OXYGEN_SPECIES_BIOSYNTHETIC_PROCESS	GO_REACTIVE_OXYGEN_SPECIES_BIOSYNTHETIC_PROCESS		22	0.399368	1.01637	0.427435	0.796586	1	2099	tags=36%, list=16%, signal=43%
GO_CHANNEL_REGULATOR_ACTIVITY	GO_CHANNEL_REGULATOR_ACTIVITY		106	0.245244	1.01631	0.422619	0.795861	1	2689	tags=25%, list=21%, signal=31%
GO_LIGASE_ACTIVITY_FORMING_CARBON_OXYGEN_BONDS	GO_LIGASE_ACTIVITY_FORMING_CARBON_OXYGEN_BONDS		31	0.351845	1.01594	0.431818	0.795977	1	3430	tags=48%, list=26%, signal=66%
GO_INSULIN_RECEPTOR_BINDING	GO_INSULIN_RECEPTOR_BINDING		30	0.330702	1.01584	0.433735	0.795331	1	2749	tags=37%, list=21%, signal=46%
GO_EARLY_ENDOSOME	GO_EARLY_ENDOSOME		231	0.234051	1.01539	0.432692	0.795678	1	2587	tags=26%, list=20%, signal=32%
GO_ZYMOGEN_ACTIVATION	GO_ZYMOGEN_ACTIVATION		99	0.299144	1.01459	0.426829	0.796913	1	2878	tags=35%, list=22%, signal=45%
GO_DNA_LIGATION	GO_DNA_LIGATION		15	0.392211	1.01449	0.438134	0.796269	1	1934	tags=33%, list=15%, signal=39%
GO_NEGATIVE_REGULATION_OF_INTRINSIC_APOPTOTIC_SIGNALING_PATHWAY	GO_NEGATIVE_REGULATION_OF_INTRINSIC_APOPTOTIC_SIGNALING_PATHWAY		78	0.254719	1.01432	0.436538	0.795794	1	2213	tags=23%, list=17%, signal=28%
GO_POSTREPLICATION_REPAIR	GO_POSTREPLICATION_REPAIR		43	0.384804	1.01404	0.447316	0.795668	1	3417	tags=56%, list=26%, signal=75%
GO_MISFOLDED_OR_INCOMPLETELY_SYNTHESIZED_PROTEIN_CATABOLIC_PROCESS	GO_MISFOLDED_OR_INCOMPLETELY_SYNTHESIZED_PROTEIN_CATABOLIC_PROCESS		15	0.352543	1.01366	0.429412	0.795806	1	4506	tags=60%, list=35%, signal=92%
GO_CARBOHYDRATE_BINDING	GO_CARBOHYDRATE_BINDING		195	0.281426	1.01303	0.42549	0.796636	1	2343	tags=25%, list=18%, signal=30%
GO_WNT_SIGNALING_PATHWAY	GO_WNT_SIGNALING_PATHWAY		284	0.217673	1.01169	0.421268	0.799388	1	2827	tags=28%, list=22%, signal=35%
GO_AGGRESOME	GO_AGGRESOME		22	0.326652	1.01066	0.428302	0.801251	1	2422	tags=27%, list=19%, signal=33%
GO_PHOSPHOLIPID_TRANSPORTER_ACTIVITY	GO_PHOSPHOLIPID_TRANSPORTER_ACTIVITY		33	0.314776	1.01057	0.43487	0.800567	1	1647	tags=18%, list=13%, signal=21%
GO_REGULATION_OF_ALTERNATIVE_MRNA_SPLICING_VIA_SPLICEOSOME	GO_REGULATION_OF_ALTERNATIVE_MRNA_SPLICING_VIA_SPLICEOSOME		20	0.322667	1.01053	0.430556	0.799796	1	2899	tags=35%, list=22%, signal=45%
GO_STEROID_HORMONE_RECEPTOR_BINDING	GO_STEROID_HORMONE_RECEPTOR_BINDING		69	0.288169	1.00939	0.418891	0.801959	1	1777	tags=25%, list=14%, signal=28%
GO_REGULATION_OF_OXIDOREDUCTASE_ACTIVITY	GO_REGULATION_OF_OXIDOREDUCTASE_ACTIVITY		81	0.247179	1.00851	0.448819	0.803361	1	2656	tags=26%, list=20%, signal=32%
GO_REGULATION_OF_RECEPTOR_BIOSYNTHETIC_PROCESS	GO_REGULATION_OF_RECEPTOR_BIOSYNTHETIC_PROCESS		17	0.369938	1.0083	0.462302	0.803038	1	1784	tags=24%, list=14%, signal=27%
GO_MEMBRANE_DISASSEMBLY	GO_MEMBRANE_DISASSEMBLY		40	0.36659	1.00811	0.445564	0.802627	1	3407	tags=40%, list=26%, signal=54%
GO_POSTTRANSCRIPTIONAL_GENE_SILENCING	GO_POSTTRANSCRIPTIONAL_GENE_SILENCING		29	0.31983	1.0073	0.464503	0.803797	1	2503	tags=38%, list=19%, signal=47%
GO_REGULATION_OF_SUPEROXIDE_METABOLIC_PROCESS	GO_REGULATION_OF_SUPEROXIDE_METABOLIC_PROCESS		22	0.39366	1.00725	0.449505	0.803036	1	859	tags=23%, list=7%, signal=24%
GO_POSITIVE_REGULATION_OF_WNT_SIGNALING_PATHWAY	GO_POSITIVE_REGULATION_OF_WNT_SIGNALING_PATHWAY		119	0.246122	1.00699	0.410359	0.802859	1	3206	tags=33%, list=25%, signal=43%
GO_PROTEIN_METHYLTRANSFERASE_ACTIVITY	GO_PROTEIN_METHYLTRANSFERASE_ACTIVITY		54	0.281294	1.00696	0.458661	0.802063	1	2301	tags=22%, list=18%, signal=27%
GO_GLAND_DEVELOPMENT	GO_GLAND_DEVELOPMENT		340	0.231251	1.00643	0.44894	0.802589	1	1793	tags=18%, list=14%, signal=20%
GO_INTRACELLULAR_RECEPTOR_SIGNALING_PATHWAY	GO_INTRACELLULAR_RECEPTOR_SIGNALING_PATHWAY		139	0.23762	1.00629	0.445098	0.802068	1	3429	tags=33%, list=26%, signal=44%
GO_ATP_HYDROLYSIS_COUPLED_TRANSMEMBRANE_TRANSPORT	GO_ATP_HYDROLYSIS_COUPLED_TRANSMEMBRANE_TRANSPORT		31	0.318669	1.0061	0.456	0.801682	1	2836	tags=39%, list=22%, signal=49%
GO_RNA_METHYLTRANSFERASE_ACTIVITY	GO_RNA_METHYLTRANSFERASE_ACTIVITY		24	0.339688	1.00562	0.463362	0.802089	1	1436	tags=17%, list=11%, signal=19%
GO_MITOCHONDRION_MORPHOGENESIS	GO_MITOCHONDRION_MORPHOGENESIS		15	0.380747	1.00549	0.457256	0.801531	1	2826	tags=40%, list=22%, signal=51%
GO_PEPTIDYL_PROLINE_MODIFICATION	GO_PEPTIDYL_PROLINE_MODIFICATION		41	0.319393	1.0048	0.445808	0.802404	1	2736	tags=32%, list=21%, signal=40%
GO_EXTRINSIC_COMPONENT_OF_ORGANELLE_MEMBRANE	GO_EXTRINSIC_COMPONENT_OF_ORGANELLE_MEMBRANE		19	0.346422	1.00467	0.44511	0.801843	1	2690	tags=37%, list=21%, signal=46%
GO_FATTY_ACID_TRANSPORT	GO_FATTY_ACID_TRANSPORT		44	0.344698	1.00466	0.409804	0.801014	1	2080	tags=30%, list=16%, signal=35%
GO_CARBOXYPEPTIDASE_ACTIVITY	GO_CARBOXYPEPTIDASE_ACTIVITY		29	0.370073	1.0042	0.447034	0.801309	1	1807	tags=31%, list=14%, signal=36%
GO_SPERM_PART	GO_SPERM_PART		83	0.25364	1.00413	0.430894	0.800638	1	1235	tags=14%, list=9%, signal=16%
GO_MACROMOLECULE_METHYLATION	GO_MACROMOLECULE_METHYLATION		129	0.239645	1.00407	0.446465	0.799923	1	2301	tags=20%, list=18%, signal=24%
GO_NUCLEOTIDE_TRANSPORT	GO_NUCLEOTIDE_TRANSPORT		18	0.360727	1.00389	0.481876	0.79954	1	689	tags=22%, list=5%, signal=23%
GO_PROTEIN_K63_LINKED_DEUBIQUITINATION	GO_PROTEIN_K63_LINKED_DEUBIQUITINATION		17	0.304536	1.0029	0.452333	0.80127	1	2785	tags=35%, list=21%, signal=45%
GO_EXOSOME_RNASE_COMPLEX_	GO_EXOSOME_RNASE_COMPLEX_		15	0.377772	1.00157	0.445833	0.803877	1	1925	tags=27%, list=15%, signal=31%
GO_GOLGI_TO_VACUOLE_TRANSPORT	GO_GOLGI_TO_VACUOLE_TRANSPORT		21	0.331724	1.0014	0.473888	0.803457	1	3442	tags=43%, list=26%, signal=58%
GO_LATERAL_PLASMA_MEMBRANE	GO_LATERAL_PLASMA_MEMBRANE		41	0.330318	1.00107	0.445946	0.80348	1	1221	tags=17%, list=9%, signal=19%
GO_CELLULAR_RESPONSE_TO_ESTRADIOL_STIMULUS	GO_CELLULAR_RESPONSE_TO_ESTRADIOL_STIMULUS		25	0.367755	1.00104	0.453815	0.80268	1	2781	tags=32%, list=21%, signal=41%
GO_VASODILATION	GO_VASODILATION		24	0.36314	1.00069	0.447791	0.802699	1	2068	tags=33%, list=16%, signal=40%
GO_POSITIVE_REGULATION_OF_LIPID_BIOSYNTHETIC_PROCESS	GO_POSITIVE_REGULATION_OF_LIPID_BIOSYNTHETIC_PROCESS		56	0.310414	1.00036	0.45674	0.802755	1	2738	tags=36%, list=21%, signal=45%
GO_GASTRULATION_WITH_MOUTH_FORMING_SECOND	GO_GASTRULATION_WITH_MOUTH_FORMING_SECOND		26	0.312048	0.999393	0.426036	0.804401	1	1769	tags=23%, list=14%, signal=27%
GO_EXPLORATION_BEHAVIOR	GO_EXPLORATION_BEHAVIOR		20	0.337553	0.998122	0.463074	0.806892	1	422	tags=10%, list=3%, signal=10%
GO_INTRINSIC_APOPTOTIC_SIGNALING_PATHWAY_IN_RESPONSE_TO_ENDOPLASMIC_RETICULUM_STRESS	GO_INTRINSIC_APOPTOTIC_SIGNALING_PATHWAY_IN_RESPONSE_TO_ENDOPLASMIC_RETICULUM_STRESS		26	0.324398	0.997707	0.457594	0.807134	1	3883	tags=50%, list=30%, signal=71%
GO_RESPONSE_TO_ORGANOPHOSPHORUS	GO_RESPONSE_TO_ORGANOPHOSPHORUS		127	0.288271	0.996977	0.457529	0.808138	1	1341	tags=16%, list=10%, signal=17%
GO_MANNOSYLATION	GO_MANNOSYLATION		20	0.373247	0.996642	0.469512	0.808177	1	2275	tags=35%, list=17%, signal=42%
GO_ALCOHOL_BIOSYNTHETIC_PROCESS	GO_ALCOHOL_BIOSYNTHETIC_PROCESS		87	0.306837	0.996449	0.445759	0.807848	1	1986	tags=25%, list=15%, signal=30%
GO_REGULATION_OF_ANION_TRANSMEMBRANE_TRANSPORT	GO_REGULATION_OF_ANION_TRANSMEMBRANE_TRANSPORT		23	0.311151	0.996086	0.469667	0.80793	1	2129	tags=22%, list=16%, signal=26%
GO_HOMOLOGOUS_CHROMOSOME_SEGREGATION	GO_HOMOLOGOUS_CHROMOSOME_SEGREGATION		24	0.333178	0.99558	0.445607	0.808486	1	2007	tags=21%, list=15%, signal=25%
GO_POSITIVE_REGULATION_OF_AUTOPHAGY	GO_POSITIVE_REGULATION_OF_AUTOPHAGY		59	0.270239	0.994929	0.435743	0.809398	1	3412	tags=36%, list=26%, signal=48%
GO_NEGATIVE_REGULATION_OF_RECEPTOR_MEDIATED_ENDOCYTOSIS	GO_NEGATIVE_REGULATION_OF_RECEPTOR_MEDIATED_ENDOCYTOSIS		15	0.322419	0.994877	0.473786	0.808688	1	2991	tags=33%, list=23%, signal=43%
GO_ENDOSOMAL_PART	GO_ENDOSOMAL_PART		314	0.232317	0.993852	0.449902	0.810511	1	2638	tags=26%, list=20%, signal=32%
GO_ESTABLISHMENT_OF_MITOCHONDRION_LOCALIZATION	GO_ESTABLISHMENT_OF_MITOCHONDRION_LOCALIZATION		16	0.353281	0.992257	0.439842	0.813697	1	212	tags=13%, list=2%, signal=13%
GO_POSITIVE_REGULATION_OF_TRANSCRIPTION_INITIATION_FROM_RNA_POLYMERASE_II_PROMOTER	GO_POSITIVE_REGULATION_OF_TRANSCRIPTION_INITIATION_FROM_RNA_POLYMERASE_II_PROMOTER		15	0.318887	0.992163	0.479167	0.813072	1	3316	tags=47%, list=25%, signal=63%
GO_TRIGLYCERIDE_CATABOLIC_PROCESS	GO_TRIGLYCERIDE_CATABOLIC_PROCESS		18	0.440943	0.992016	0.50096	0.812572	1	2312	tags=44%, list=18%, signal=54%
GO_NEGATIVE_REGULATION_OF_PROTEIN_CATABOLIC_PROCESS	GO_NEGATIVE_REGULATION_OF_PROTEIN_CATABOLIC_PROCESS		85	0.284024	0.99192	0.470942	0.811975	1	1955	tags=26%, list=15%, signal=30%
GO_EXONUCLEASE_ACTIVITY	GO_EXONUCLEASE_ACTIVITY		50	0.320161	0.991909	0.48996	0.811148	1	3516	tags=42%, list=27%, signal=57%
GO_LATE_ENDOSOME_MEMBRANE	GO_LATE_ENDOSOME_MEMBRANE		67	0.26823	0.991528	0.465753	0.811278	1	2417	tags=30%, list=19%, signal=36%
GO_NUCLEAR_ENVELOPE_ORGANIZATION	GO_NUCLEAR_ENVELOPE_ORGANIZATION		61	0.320054	0.990587	0.453465	0.812883	1	3812	tags=44%, list=29%, signal=62%
GO_POLYOL_METABOLIC_PROCESS	GO_POLYOL_METABOLIC_PROCESS		72	0.257979	0.990484	0.481409	0.812327	1	1913	tags=19%, list=15%, signal=23%
GO_POSITIVE_REGULATION_OF_CARTILAGE_DEVELOPMENT	GO_POSITIVE_REGULATION_OF_CARTILAGE_DEVELOPMENT		25	0.332006	0.990402	0.463035	0.811674	1	1570	tags=20%, list=12%, signal=23%
GO_GLUCOSAMINE_CONTAINING_COMPOUND_METABOLIC_PROCESS	GO_GLUCOSAMINE_CONTAINING_COMPOUND_METABOLIC_PROCESS		21	0.364403	0.989169	0.502994	0.813968	1	1546	tags=24%, list=12%, signal=27%
GO_TUMOR_NECROSIS_FACTOR_MEDIATED_SIGNALING_PATHWAY	GO_TUMOR_NECROSIS_FACTOR_MEDIATED_SIGNALING_PATHWAY		105	0.247873	0.988482	0.457529	0.814894	1	3330	tags=35%, list=26%, signal=47%
GO_CELLULAR_PIGMENTATION	GO_CELLULAR_PIGMENTATION		34	0.322407	0.988391	0.46679	0.814284	1	2373	tags=32%, list=18%, signal=39%
GO_DEOXYRIBONUCLEASE_ACTIVITY	GO_DEOXYRIBONUCLEASE_ACTIVITY		51	0.286368	0.987739	0.477823	0.815102	1	2569	tags=29%, list=20%, signal=36%
GO_RESPONSE_TO_INSULIN	GO_RESPONSE_TO_INSULIN		173	0.243192	0.987434	0.46139	0.814995	1	2213	tags=22%, list=17%, signal=26%
GO_PHOSPHATIDYLINOSITOL_BINDING	GO_PHOSPHATIDYLINOSITOL_BINDING		138	0.244041	0.987329	0.4714	0.814415	1	2649	tags=27%, list=20%, signal=33%
GO_LATE_ENDOSOME	GO_LATE_ENDOSOME		148	0.248951	0.987326	0.478846	0.813579	1	2417	tags=26%, list=19%, signal=32%
GO_PHOSPHATIDYLCHOLINE_BIOSYNTHETIC_PROCESS	GO_PHOSPHATIDYLCHOLINE_BIOSYNTHETIC_PROCESS		18	0.346026	0.986916	0.48249	0.813825	1	1898	tags=28%, list=15%, signal=32%
GO_NEURON_DEATH	GO_NEURON_DEATH		38	0.285958	0.986353	0.455253	0.814466	1	1257	tags=21%, list=10%, signal=23%
GO_REGULATION_OF_DEFENSE_RESPONSE_TO_VIRUS_BY_HOST	GO_REGULATION_OF_DEFENSE_RESPONSE_TO_VIRUS_BY_HOST		99	0.235982	0.985223	0.469758	0.816544	1	1625	tags=15%, list=12%, signal=17%
GO_3_5_EXONUCLEASE_ACTIVITY	GO_3_5_EXONUCLEASE_ACTIVITY		32	0.318521	0.985005	0.489796	0.816275	1	3516	tags=41%, list=27%, signal=55%
GO_NEGATIVE_REGULATION_OF_COAGULATION	GO_NEGATIVE_REGULATION_OF_COAGULATION		45	0.351836	0.984445	0.476744	0.816893	1	2878	tags=40%, list=22%, signal=51%
GO_DNA_CATABOLIC_PROCESS	GO_DNA_CATABOLIC_PROCESS		23	0.305936	0.983826	0.485323	0.817713	1	3535	tags=43%, list=27%, signal=60%
GO_TRANSCRIPTION_ELONGATION_FROM_RNA_POLYMERASE_II_PROMOTER	GO_TRANSCRIPTION_ELONGATION_FROM_RNA_POLYMERASE_II_PROMOTER		74	0.287991	0.983548	0.459883	0.817566	1	3552	tags=41%, list=27%, signal=55%
GO_GOLGI_ASSOCIATED_VESICLE_MEMBRANE	GO_GOLGI_ASSOCIATED_VESICLE_MEMBRANE		35	0.308874	0.983164	0.470817	0.817715	1	3171	tags=40%, list=24%, signal=53%
GO_REGULATION_OF_MEIOTIC_CELL_CYCLE	GO_REGULATION_OF_MEIOTIC_CELL_CYCLE		33	0.325424	0.982693	0.459839	0.81812	1	2153	tags=21%, list=17%, signal=25%
GO_MULTI_ORGANISM_LOCALIZATION	GO_MULTI_ORGANISM_LOCALIZATION		60	0.292831	0.981624	0.477823	0.820108	1	2402	tags=25%, list=18%, signal=31%
GO_AMINE_BIOSYNTHETIC_PROCESS	GO_AMINE_BIOSYNTHETIC_PROCESS		19	0.324701	0.981469	0.488889	0.819655	1	610	tags=11%, list=5%, signal=11%
GO_MYD88_INDEPENDENT_TOLL_LIKE_RECEPTOR_SIGNALING_PATHWAY	GO_MYD88_INDEPENDENT_TOLL_LIKE_RECEPTOR_SIGNALING_PATHWAY		29	0.328002	0.980841	0.48008	0.820452	1	1414	tags=17%, list=11%, signal=19%
GO_ENDOMEMBRANE_SYSTEM_ORGANIZATION	GO_ENDOMEMBRANE_SYSTEM_ORGANIZATION		340	0.227517	0.980517	0.485714	0.820468	1	3207	tags=30%, list=25%, signal=39%
GO_POSITIVE_REGULATION_OF_FATTY_ACID_METABOLIC_PROCESS	GO_POSITIVE_REGULATION_OF_FATTY_ACID_METABOLIC_PROCESS		29	0.365019	0.9802	0.496957	0.820445	1	3268	tags=55%, list=25%, signal=73%
GO_ATPASE_BINDING	GO_ATPASE_BINDING		60	0.26606	0.980085	0.468571	0.819938	1	1694	tags=20%, list=13%, signal=23%
GO_UBIQUITIN_LIKE_PROTEIN_LIGASE_BINDING	GO_UBIQUITIN_LIKE_PROTEIN_LIGASE_BINDING		222	0.235891	0.97984	0.48008	0.819744	1	3705	tags=38%, list=28%, signal=52%
GO_MYOBLAST_DIFFERENTIATION	GO_MYOBLAST_DIFFERENTIATION		33	0.301715	0.979089	0.476378	0.820851	1	2244	tags=33%, list=17%, signal=40%
GO_MACROMOLECULE_TRANSMEMBRANE_TRANSPORTER_ACTIVITY	GO_MACROMOLECULE_TRANSMEMBRANE_TRANSPORTER_ACTIVITY		16	0.32444	0.978604	0.517034	0.821245	1	4411	tags=56%, list=34%, signal=85%
GO_NEGATIVE_REGULATION_OF_MEIOTIC_CELL_CYCLE	GO_NEGATIVE_REGULATION_OF_MEIOTIC_CELL_CYCLE		15	0.391984	0.978269	0.507014	0.821229	1	2945	tags=33%, list=23%, signal=43%
GO_GLOBAL_GENOME_NUCLEOTIDE_EXCISION_REPAIR	GO_GLOBAL_GENOME_NUCLEOTIDE_EXCISION_REPAIR		31	0.290241	0.976719	0.487805	0.824424	1	3569	tags=39%, list=27%, signal=53%
GO_SERINE_TYPE_EXOPEPTIDASE_ACTIVITY	GO_SERINE_TYPE_EXOPEPTIDASE_ACTIVITY		15	0.415692	0.97616	0.466797	0.825082	1	2802	tags=53%, list=21%, signal=68%
GO_POSITIVE_REGULATION_OF_SODIUM_ION_TRANSMEMBRANE_TRANSPORT	GO_POSITIVE_REGULATION_OF_SODIUM_ION_TRANSMEMBRANE_TRANSPORT		15	0.361631	0.975853	0.478927	0.824994	1	397	tags=13%, list=3%, signal=14%
GO_NEGATIVE_REGULATION_OF_STRESS_ACTIVATED_PROTEIN_KINASE_SIGNALING_CASCADE	GO_NEGATIVE_REGULATION_OF_STRESS_ACTIVATED_PROTEIN_KINASE_SIGNALING_CASCADE		33	0.320415	0.975713	0.493069	0.824528	1	2077	tags=27%, list=16%, signal=32%
GO_PEPTIDE_HORMONE_PROCESSING	GO_PEPTIDE_HORMONE_PROCESSING		31	0.362148	0.975286	0.490982	0.824752	1	3111	tags=35%, list=24%, signal=46%
GO_VESICLE_DOCKING_INVOLVED_IN_EXOCYTOSIS	GO_VESICLE_DOCKING_INVOLVED_IN_EXOCYTOSIS		29	0.296798	0.974786	0.5	0.82522	1	2743	tags=28%, list=21%, signal=35%
GO_REGULATION_OF_GLUCOSE_TRANSPORT	GO_REGULATION_OF_GLUCOSE_TRANSPORT		83	0.266383	0.973304	0.510848	0.828235	1	3452	tags=37%, list=26%, signal=50%
GO_NEGATIVE_REGULATION_OF_APOPTOTIC_SIGNALING_PATHWAY	GO_NEGATIVE_REGULATION_OF_APOPTOTIC_SIGNALING_PATHWAY		170	0.239291	0.973091	0.519231	0.827942	1	3034	tags=31%, list=23%, signal=39%
GO_CEREBRAL_CORTEX_RADIALLY_ORIENTED_CELL_MIGRATION	GO_CEREBRAL_CORTEX_RADIALLY_ORIENTED_CELL_MIGRATION		23	0.30829	0.972813	0.482558	0.827844	1	2397	tags=26%, list=18%, signal=32%
GO_EXONUCLEASE_ACTIVITY_ACTIVE_WITH_EITHER_RIBO_OR_DEOXYRIBONUCLEIC_ACIDS_AND_PRODUCING_5_PHOSPHOMONOESTERS	GO_EXONUCLEASE_ACTIVITY_ACTIVE_WITH_EITHER_RIBO_OR_DEOXYRIBONUCLEIC_ACIDS_AND_PRODUCING_5_PHOSPHOMONOESTERS		32	0.350848	0.972714	0.501002	0.827255	1	2843	tags=34%, list=22%, signal=44%
GO_NEGATIVE_REGULATION_OF_MACROAUTOPHAGY	GO_NEGATIVE_REGULATION_OF_MACROAUTOPHAGY		15	0.360233	0.972591	0.5	0.826755	1	1149	tags=27%, list=9%, signal=29%
GO_PHOSPHOLIPID_TRANSPORT	GO_PHOSPHOLIPID_TRANSPORT		45	0.281919	0.972554	0.483431	0.826016	1	3186	tags=31%, list=24%, signal=41%
GO_REGULATION_OF_MONOOXYGENASE_ACTIVITY	GO_REGULATION_OF_MONOOXYGENASE_ACTIVITY		57	0.247849	0.972511	0.508671	0.825297	1	1146	tags=16%, list=9%, signal=17%
GO_NEGATIVE_REGULATION_OF_ORGANIC_ACID_TRANSPORT	GO_NEGATIVE_REGULATION_OF_ORGANIC_ACID_TRANSPORT		18	0.328182	0.97244	0.492063	0.82467	1	422	tags=11%, list=3%, signal=11%
GO_RESPONSE_TO_DRUG	GO_RESPONSE_TO_DRUG		393	0.248614	0.970865	0.502066	0.827848	1	2336	tags=22%, list=18%, signal=26%
GO_SPERM_FLAGELLUM	GO_SPERM_FLAGELLUM		32	0.320555	0.968121	0.519841	0.834033	1	2759	tags=31%, list=21%, signal=40%
GO_POSITIVE_REGULATION_OF_CALCIUM_ION_TRANSMEMBRANE_TRANSPORTER_ACTIVITY	GO_POSITIVE_REGULATION_OF_CALCIUM_ION_TRANSMEMBRANE_TRANSPORTER_ACTIVITY		27	0.315403	0.967839	0.510163	0.833943	1	719	tags=15%, list=6%, signal=16%
GO_POSITIVE_REGULATION_OF_RESPONSE_TO_CYTOKINE_STIMULUS	GO_POSITIVE_REGULATION_OF_RESPONSE_TO_CYTOKINE_STIMULUS		26	0.337203	0.967435	0.48	0.834124	1	1213	tags=15%, list=9%, signal=17%
GO_DEPHOSPHORYLATION	GO_DEPHOSPHORYLATION		203	0.225344	0.967304	0.536634	0.833583	1	1913	tags=19%, list=15%, signal=22%
GO_SMALL_RIBOSOMAL_SUBUNIT	GO_SMALL_RIBOSOMAL_SUBUNIT		57	0.276672	0.966989	0.459627	0.833557	1	1540	tags=16%, list=12%, signal=18%
GO_POSITIVE_REGULATION_OF_LIPID_STORAGE	GO_POSITIVE_REGULATION_OF_LIPID_STORAGE		15	0.40434	0.966693	0.517103	0.833496	1	2690	tags=33%, list=21%, signal=42%
GO_ADIPOSE_TISSUE_DEVELOPMENT	GO_ADIPOSE_TISSUE_DEVELOPMENT		24	0.346213	0.96634	0.495816	0.833593	1	2214	tags=38%, list=17%, signal=45%
GO_POSITIVE_REGULATION_OF_VASODILATION	GO_POSITIVE_REGULATION_OF_VASODILATION		28	0.333891	0.965924	0.503968	0.833773	1	723	tags=11%, list=6%, signal=11%
GO_NUCLEAR_PORE	GO_NUCLEAR_PORE		67	0.314457	0.965885	0.502058	0.83305	1	2292	tags=24%, list=18%, signal=29%
GO_NEGATIVE_REGULATION_OF_ERBB_SIGNALING_PATHWAY	GO_NEGATIVE_REGULATION_OF_ERBB_SIGNALING_PATHWAY		35	0.294886	0.965803	0.513238	0.832424	1	2756	tags=29%, list=21%, signal=36%
GO_PHOSPHATIDIC_ACID_METABOLIC_PROCESS	GO_PHOSPHATIDIC_ACID_METABOLIC_PROCESS		23	0.340659	0.965581	0.506048	0.832124	1	1833	tags=26%, list=14%, signal=30%
GO_DEMETHYLATION	GO_DEMETHYLATION		30	0.304579	0.96549	0.491363	0.831519	1	561	tags=13%, list=4%, signal=14%
GO_NEUTRAL_AMINO_ACID_TRANSPORT	GO_NEUTRAL_AMINO_ACID_TRANSPORT		22	0.346095	0.964098	0.47637	0.834237	1	3004	tags=41%, list=23%, signal=53%
GO_MALE_GENITALIA_DEVELOPMENT	GO_MALE_GENITALIA_DEVELOPMENT		17	0.388009	0.964064	0.510121	0.833492	1	687	tags=18%, list=5%, signal=19%
GO_MAGNESIUM_ION_BINDING	GO_MAGNESIUM_ION_BINDING		145	0.242081	0.964022	0.518812	0.832774	1	3435	tags=37%, list=26%, signal=49%
GO_NEGATIVE_REGULATION_OF_WOUND_HEALING	GO_NEGATIVE_REGULATION_OF_WOUND_HEALING		54	0.330249	0.963691	0.49497	0.832815	1	2907	tags=37%, list=22%, signal=47%
GO_DIENCEPHALON_DEVELOPMENT	GO_DIENCEPHALON_DEVELOPMENT		65	0.26796	0.963685	0.511066	0.832012	1	1587	tags=15%, list=12%, signal=17%
GO_REGULATION_OF_CHOLESTEROL_EFFLUX	GO_REGULATION_OF_CHOLESTEROL_EFFLUX		18	0.342577	0.963106	0.477927	0.832608	1	2738	tags=39%, list=21%, signal=49%
GO_APOPTOTIC_SIGNALING_PATHWAY	GO_APOPTOTIC_SIGNALING_PATHWAY		248	0.237023	0.96287	0.499025	0.832411	1	2395	tags=24%, list=18%, signal=29%
GO_PYRIMIDINE_RIBONUCLEOSIDE_METABOLIC_PROCESS	GO_PYRIMIDINE_RIBONUCLEOSIDE_METABOLIC_PROCESS		25	0.310573	0.962099	0.516	0.833561	1	950	tags=16%, list=7%, signal=17%
GO_PHOSPHOLIPID_BINDING	GO_PHOSPHOLIPID_BINDING		249	0.23367	0.961922	0.561508	0.833244	1	2649	tags=25%, list=20%, signal=31%
GO_ACID_SECRETION	GO_ACID_SECRETION		55	0.295146	0.961715	0.510721	0.832953	1	364	tags=9%, list=3%, signal=9%
GO_EXTRINSIC_APOPTOTIC_SIGNALING_PATHWAY_VIA_DEATH_DOMAIN_RECEPTORS	GO_EXTRINSIC_APOPTOTIC_SIGNALING_PATHWAY_VIA_DEATH_DOMAIN_RECEPTORS		33	0.281189	0.96099	0.494186	0.83398	1	3667	tags=42%, list=28%, signal=59%
GO_PEPTIDASE_ACTIVATOR_ACTIVITY	GO_PEPTIDASE_ACTIVATOR_ACTIVITY		36	0.312097	0.960359	0.489879	0.834745	1	2610	tags=33%, list=20%, signal=42%
GO_REGULATION_OF_VASODILATION	GO_REGULATION_OF_VASODILATION		41	0.318432	0.960091	0.519507	0.834599	1	723	tags=10%, list=6%, signal=10%
GO_POSITIVE_REGULATION_OF_JUN_KINASE_ACTIVITY	GO_POSITIVE_REGULATION_OF_JUN_KINASE_ACTIVITY		55	0.246012	0.959967	0.518367	0.834114	1	1168	tags=13%, list=9%, signal=14%
GO_LONG_CHAIN_FATTY_ACID_TRANSPORT	GO_LONG_CHAIN_FATTY_ACID_TRANSPORT		33	0.357385	0.959748	0.504016	0.83385	1	519	tags=15%, list=4%, signal=16%
GO_PROTEIN_ACTIVATION_CASCADE	GO_PROTEIN_ACTIVATION_CASCADE		69	0.396656	0.959581	0.52495	0.833464	1	1979	tags=35%, list=15%, signal=41%
GO_NEGATIVE_REGULATION_OF_WNT_SIGNALING_PATHWAY	GO_NEGATIVE_REGULATION_OF_WNT_SIGNALING_PATHWAY		161	0.227969	0.958658	0.533742	0.834987	1	3117	tags=34%, list=24%, signal=44%
GO_CATALYTIC_STEP_2_SPLICEOSOME	GO_CATALYTIC_STEP_2_SPLICEOSOME		60	0.298986	0.958352	0.483366	0.834942	1	3810	tags=43%, list=29%, signal=61%
GO_GENITALIA_DEVELOPMENT	GO_GENITALIA_DEVELOPMENT		35	0.286174	0.958277	0.528713	0.834346	1	687	tags=11%, list=5%, signal=12%
GO_GTPASE_ACTIVITY	GO_GTPASE_ACTIVITY		174	0.242123	0.957641	0.481557	0.835121	1	2743	tags=25%, list=21%, signal=31%
GO_OSTEOBLAST_DEVELOPMENT	GO_OSTEOBLAST_DEVELOPMENT		17	0.314504	0.957611	0.509728	0.834374	1	708	tags=12%, list=5%, signal=12%
GO_HORMONE_BINDING	GO_HORMONE_BINDING		59	0.292191	0.957044	0.507435	0.834959	1	1612	tags=17%, list=12%, signal=19%
GO_STEROL_BINDING	GO_STEROL_BINDING		35	0.321403	0.956763	0.528942	0.834831	1	2172	tags=29%, list=17%, signal=34%
GO_RECIPROCAL_DNA_RECOMBINATION	GO_RECIPROCAL_DNA_RECOMBINATION		28	0.349066	0.956336	0.495885	0.835122	1	2189	tags=29%, list=17%, signal=34%
GO_POSITIVE_REGULATION_OF_SODIUM_ION_TRANSPORT	GO_POSITIVE_REGULATION_OF_SODIUM_ION_TRANSPORT		28	0.316494	0.955049	0.544204	0.837541	1	1074	tags=14%, list=8%, signal=16%
GO_REGULATION_OF_SYMBIOSIS_ENCOMPASSING_MUTUALISM_THROUGH_PARASITISM	GO_REGULATION_OF_SYMBIOSIS_ENCOMPASSING_MUTUALISM_THROUGH_PARASITISM		177	0.241578	0.954752	0.5	0.837466	1	2094	tags=20%, list=16%, signal=23%
GO_TRANSPORT_VESICLE	GO_TRANSPORT_VESICLE		261	0.242278	0.954574	0.511538	0.837081	1	2631	tags=26%, list=20%, signal=32%
GO_PROTEIN_ACETYLATION	GO_PROTEIN_ACETYLATION		81	0.250964	0.9536	0.533333	0.838791	1	2419	tags=22%, list=19%, signal=27%
GO_PHAGOSOME_ACIDIFICATION	GO_PHAGOSOME_ACIDIFICATION		21	0.338228	0.951167	0.496226	0.844231	1	2168	tags=33%, list=17%, signal=40%
GO_ACTIVATION_OF_CYSTEINE_TYPE_ENDOPEPTIDASE_ACTIVITY	GO_ACTIVATION_OF_CYSTEINE_TYPE_ENDOPEPTIDASE_ACTIVITY		84	0.276697	0.947938	0.549696	0.851638	1	2862	tags=33%, list=22%, signal=42%
GO_RESPONSE_TO_INORGANIC_SUBSTANCE	GO_RESPONSE_TO_INORGANIC_SUBSTANCE		440	0.236165	0.947382	0.571992	0.852281	1	2314	tags=23%, list=18%, signal=26%
GO_PYRIMIDINE_NUCLEOSIDE_CATABOLIC_PROCESS	GO_PYRIMIDINE_NUCLEOSIDE_CATABOLIC_PROCESS		16	0.386099	0.94508	0.542969	0.857404	1	2442	tags=44%, list=19%, signal=54%
GO_SODIUM_ION_TRANSPORT	GO_SODIUM_ION_TRANSPORT		101	0.259714	0.944677	0.547842	0.857646	1	1677	tags=14%, list=13%, signal=16%
GO_ANDROGEN_RECEPTOR_SIGNALING_PATHWAY	GO_ANDROGEN_RECEPTOR_SIGNALING_PATHWAY		31	0.317092	0.943866	0.532389	0.858799	1	1859	tags=26%, list=14%, signal=30%
GO_PHOSPHATIDYLCHOLINE_METABOLIC_PROCESS	GO_PHOSPHATIDYLCHOLINE_METABOLIC_PROCESS		41	0.299645	0.943452	0.568401	0.859081	1	1421	tags=20%, list=11%, signal=22%
GO_REGULATION_OF_T_CELL_CYTOKINE_PRODUCTION	GO_REGULATION_OF_T_CELL_CYTOKINE_PRODUCTION		20	0.321925	0.943284	0.521212	0.858674	1	204	tags=10%, list=2%, signal=10%
GO_PROTEASE_BINDING	GO_PROTEASE_BINDING		91	0.259061	0.943185	0.560547	0.858128	1	2174	tags=21%, list=17%, signal=25%
GO_ORGANELLE_SUBCOMPARTMENT	GO_ORGANELLE_SUBCOMPARTMENT		228	0.245242	0.942562	0.532934	0.858825	1	3283	tags=33%, list=25%, signal=43%
GO_RESPONSE_TO_GROWTH_HORMONE	GO_RESPONSE_TO_GROWTH_HORMONE		30	0.356896	0.942547	0.545809	0.85803	1	1762	tags=27%, list=14%, signal=31%
GO_PROTON_TRANSPORTING_V_TYPE_ATPASE_COMPLEX	GO_PROTON_TRANSPORTING_V_TYPE_ATPASE_COMPLEX		19	0.338867	0.941963	0.530097	0.858704	1	2168	tags=37%, list=17%, signal=44%
GO_REGULATION_OF_RETINOIC_ACID_RECEPTOR_SIGNALING_PATHWAY	GO_REGULATION_OF_RETINOIC_ACID_RECEPTOR_SIGNALING_PATHWAY		18	0.354628	0.939935	0.551515	0.863257	1	1976	tags=28%, list=15%, signal=33%
GO_RIBOSOME_ASSEMBLY	GO_RIBOSOME_ASSEMBLY		40	0.290984	0.93858	0.51357	0.865868	1	2023	tags=20%, list=16%, signal=24%
GO_REGULATION_OF_CATECHOLAMINE_METABOLIC_PROCESS	GO_REGULATION_OF_CATECHOLAMINE_METABOLIC_PROCESS		16	0.365136	0.938479	0.567404	0.865304	1	3000	tags=44%, list=23%, signal=57%
GO_RESPONSE_TO_OXIDATIVE_STRESS	GO_RESPONSE_TO_OXIDATIVE_STRESS		308	0.232517	0.937214	0.622047	0.867666	1	2808	tags=28%, list=22%, signal=35%
GO_REGULATION_OF_FEEDING_BEHAVIOR	GO_REGULATION_OF_FEEDING_BEHAVIOR		18	0.336512	0.93713	0.518219	0.867046	1	229	tags=11%, list=2%, signal=11%
GO_AMMONIUM_TRANSMEMBRANE_TRANSPORTER_ACTIVITY	GO_AMMONIUM_TRANSMEMBRANE_TRANSPORTER_ACTIVITY		20	0.363041	0.936845	0.526531	0.866984	1	1304	tags=15%, list=10%, signal=17%
GO_SYNAPTIC_VESICLE_LOCALIZATION	GO_SYNAPTIC_VESICLE_LOCALIZATION		68	0.260175	0.93603	0.568507	0.868227	1	2737	tags=26%, list=21%, signal=33%
GO_SECONDARY_METABOLIC_PROCESS	GO_SECONDARY_METABOLIC_PROCESS		45	0.360545	0.935565	0.555126	0.868576	1	2735	tags=38%, list=21%, signal=48%
GO_REGULATION_OF_CHROMATIN_SILENCING	GO_REGULATION_OF_CHROMATIN_SILENCING		15	0.351246	0.935277	0.530534	0.868478	1	2260	tags=27%, list=17%, signal=32%
GO_NEGATIVE_REGULATION_OF_DNA_BIOSYNTHETIC_PROCESS	GO_NEGATIVE_REGULATION_OF_DNA_BIOSYNTHETIC_PROCESS		23	0.311152	0.935259	0.539062	0.867701	1	1693	tags=22%, list=13%, signal=25%
GO_REGULATION_OF_INCLUSION_BODY_ASSEMBLY	GO_REGULATION_OF_INCLUSION_BODY_ASSEMBLY		15	0.397269	0.935206	0.534	0.867013	1	4401	tags=73%, list=34%, signal=111%
GO_COPPER_ION_BINDING	GO_COPPER_ION_BINDING		46	0.280924	0.934654	0.567288	0.867613	1	1341	tags=20%, list=10%, signal=22%
GO_CIRCADIAN_REGULATION_OF_GENE_EXPRESSION	GO_CIRCADIAN_REGULATION_OF_GENE_EXPRESSION		48	0.254659	0.934449	0.560327	0.867331	1	2213	tags=21%, list=17%, signal=25%
GO_RESPONSE_TO_HEAT	GO_RESPONSE_TO_HEAT		78	0.261726	0.93436	0.538314	0.866715	1	2068	tags=23%, list=16%, signal=27%
GO_NUCLEAR_LOCALIZATION_SEQUENCE_BINDING	GO_NUCLEAR_LOCALIZATION_SEQUENCE_BINDING		19	0.340304	0.934167	0.530534	0.866384	1	3084	tags=37%, list=24%, signal=48%
GO_POSITIVE_REGULATION_OF_TYPE_I_INTERFERON_PRODUCTION	GO_POSITIVE_REGULATION_OF_TYPE_I_INTERFERON_PRODUCTION		59	0.262542	0.933678	0.539235	0.866783	1	1892	tags=24%, list=15%, signal=28%
GO_REGULATION_OF_APOPTOTIC_SIGNALING_PATHWAY	GO_REGULATION_OF_APOPTOTIC_SIGNALING_PATHWAY		306	0.218229	0.933317	0.619329	0.866863	1	2976	tags=27%, list=23%, signal=35%
GO_NEGATIVE_REGULATION_OF_GTPASE_ACTIVITY	GO_NEGATIVE_REGULATION_OF_GTPASE_ACTIVITY		33	0.3125	0.933218	0.54352	0.866299	1	995	tags=21%, list=8%, signal=23%
GO_NEGATIVE_REGULATION_OF_RESPONSE_TO_EXTRACELLULAR_STIMULUS	GO_NEGATIVE_REGULATION_OF_RESPONSE_TO_EXTRACELLULAR_STIMULUS		27	0.289204	0.932844	0.560784	0.866429	1	1152	tags=19%, list=9%, signal=20%
GO_MOTILE_CILIUM	GO_MOTILE_CILIUM		59	0.265753	0.931401	0.564612	0.869278	1	1032	tags=14%, list=8%, signal=15%
GO_PHOTOTRANSDUCTION_VISIBLE_LIGHT	GO_PHOTOTRANSDUCTION_VISIBLE_LIGHT		18	0.298734	0.930252	0.524193	0.871422	1	2418	tags=28%, list=19%, signal=34%
GO_CATION_TRANSMEMBRANE_TRANSPORTER_ACTIVITY	GO_CATION_TRANSMEMBRANE_TRANSPORTER_ACTIVITY		446	0.206786	0.929717	0.585366	0.871991	1	2235	tags=17%, list=17%, signal=19%
GO_REGULATION_OF_ACUTE_INFLAMMATORY_RESPONSE	GO_REGULATION_OF_ACUTE_INFLAMMATORY_RESPONSE		69	0.311598	0.929571	0.528376	0.871563	1	1923	tags=23%, list=15%, signal=27%
GO_CULLIN_RING_UBIQUITIN_LIGASE_COMPLEX	GO_CULLIN_RING_UBIQUITIN_LIGASE_COMPLEX		81	0.249258	0.929009	0.578431	0.87222	1	2974	tags=28%, list=23%, signal=37%
GO_BLOOD_MICROPARTICLE	GO_BLOOD_MICROPARTICLE		103	0.342912	0.92881	0.545098	0.871881	1	1692	tags=24%, list=13%, signal=28%
GO_GOLGI_CISTERNA	GO_GOLGI_CISTERNA		67	0.262788	0.928052	0.561886	0.872947	1	2205	tags=24%, list=17%, signal=29%
GO_ENDOPEPTIDASE_ACTIVITY	GO_ENDOPEPTIDASE_ACTIVITY		311	0.230814	0.927165	0.59879	0.874385	1	2827	tags=26%, list=22%, signal=32%
GO_CYTOPLASMIC_VESICLE_PART	GO_CYTOPLASMIC_VESICLE_PART		473	0.223078	0.92692	0.638171	0.874227	1	2589	tags=23%, list=20%, signal=27%
GO_REGULATION_OF_NITRIC_OXIDE_SYNTHASE_ACTIVITY	GO_REGULATION_OF_NITRIC_OXIDE_SYNTHASE_ACTIVITY		46	0.251856	0.925732	0.596899	0.876425	1	1146	tags=17%, list=9%, signal=19%
GO_FEMALE_MEIOTIC_DIVISION	GO_FEMALE_MEIOTIC_DIVISION		18	0.365304	0.925574	0.54065	0.876015	1	2189	tags=28%, list=17%, signal=33%
GO_GLUCOSE_CATABOLIC_PROCESS	GO_GLUCOSE_CATABOLIC_PROCESS		29	0.36708	0.924034	0.56917	0.879077	1	1513	tags=28%, list=12%, signal=31%
GO_REGULATION_OF_PROTEASOMAL_UBIQUITIN_DEPENDENT_PROTEIN_CATABOLIC_PROCESS	GO_REGULATION_OF_PROTEASOMAL_UBIQUITIN_DEPENDENT_PROTEIN_CATABOLIC_PROCESS		117	0.258086	0.922997	0.59252	0.880877	1	3533	tags=38%, list=27%, signal=52%
GO_THYROID_HORMONE_RECEPTOR_BINDING	GO_THYROID_HORMONE_RECEPTOR_BINDING		24	0.314954	0.922358	0.587174	0.881697	1	3200	tags=33%, list=25%, signal=44%
GO_TBP_CLASS_PROTEIN_BINDING	GO_TBP_CLASS_PROTEIN_BINDING		18	0.309759	0.922031	0.557769	0.881704	1	3316	tags=50%, list=25%, signal=67%
GO_LIPOPROTEIN_PARTICLE_RECEPTOR_BINDING	GO_LIPOPROTEIN_PARTICLE_RECEPTOR_BINDING		19	0.353567	0.919262	0.565041	0.887923	1	3485	tags=58%, list=27%, signal=79%
GO_POSITIVE_REGULATION_OF_MUSCLE_HYPERTROPHY	GO_POSITIVE_REGULATION_OF_MUSCLE_HYPERTROPHY		19	0.304892	0.918812	0.584795	0.888239	1	1107	tags=16%, list=8%, signal=17%
GO_ESCRT_COMPLEX	GO_ESCRT_COMPLEX		17	0.325426	0.918796	0.564155	0.887468	1	2620	tags=35%, list=20%, signal=44%
GO_REGULATION_OF_PLATELET_AGGREGATION	GO_REGULATION_OF_PLATELET_AGGREGATION		15	0.330067	0.918457	0.572034	0.887502	1	991	tags=20%, list=8%, signal=22%
GO_CYTOLYSIS	GO_CYTOLYSIS		23	0.403767	0.917993	0.5666	0.887834	1	1848	tags=35%, list=14%, signal=40%
GO_NUCLEAR_EUCHROMATIN	GO_NUCLEAR_EUCHROMATIN		22	0.306371	0.917507	0.592902	0.888216	1	3535	tags=41%, list=27%, signal=56%
GO_REGULATION_OF_HYDROGEN_PEROXIDE_INDUCED_CELL_DEATH	GO_REGULATION_OF_HYDROGEN_PEROXIDE_INDUCED_CELL_DEATH		17	0.345215	0.917364	0.601562	0.887745	1	2796	tags=35%, list=21%, signal=45%
GO_SCF_UBIQUITIN_LIGASE_COMPLEX	GO_SCF_UBIQUITIN_LIGASE_COMPLEX		20	0.312981	0.916776	0.603774	0.888373	1	1489	tags=25%, list=11%, signal=28%
GO_CELLULAR_RESPONSE_TO_CAMP	GO_CELLULAR_RESPONSE_TO_CAMP		44	0.2978	0.916578	0.557692	0.888037	1	236	tags=9%, list=2%, signal=9%
GO_DETOXIFICATION	GO_DETOXIFICATION		61	0.31861	0.916349	0.569937	0.887791	1	2535	tags=39%, list=19%, signal=49%
GO_POSITIVE_REGULATION_OF_PEPTIDASE_ACTIVITY	GO_POSITIVE_REGULATION_OF_PEPTIDASE_ACTIVITY		133	0.244337	0.915691	0.62753	0.888623	1	2862	tags=30%, list=22%, signal=38%
GO_INTRINSIC_APOPTOTIC_SIGNALING_PATHWAY_BY_P53_CLASS_MEDIATOR	GO_INTRINSIC_APOPTOTIC_SIGNALING_PATHWAY_BY_P53_CLASS_MEDIATOR		41	0.282062	0.9143	0.592292	0.891393	1	2341	tags=29%, list=18%, signal=36%
GO_REGULATION_OF_ORGANELLE_ASSEMBLY	GO_REGULATION_OF_ORGANELLE_ASSEMBLY		106	0.222397	0.914246	0.582205	0.890688	1	2991	tags=29%, list=23%, signal=38%
GO_REGULATION_OF_TYPE_I_INTERFERON_PRODUCTION	GO_REGULATION_OF_TYPE_I_INTERFERON_PRODUCTION		91	0.252013	0.913662	0.566337	0.891381	1	3392	tags=35%, list=26%, signal=47%
GO_APICAL_PART_OF_CELL	GO_APICAL_PART_OF_CELL		291	0.235201	0.913557	0.67963	0.890852	1	2223	tags=20%, list=17%, signal=23%
GO_ORGANELLE_TRANSPORT_ALONG_MICROTUBULE	GO_ORGANELLE_TRANSPORT_ALONG_MICROTUBULE		45	0.279323	0.913473	0.562628	0.890246	1	2800	tags=31%, list=21%, signal=39%
GO_RECEPTOR_METABOLIC_PROCESS	GO_RECEPTOR_METABOLIC_PROCESS		70	0.272745	0.911914	0.592213	0.893392	1	2288	tags=27%, list=18%, signal=33%
GO_POSITIVE_REGULATION_OF_CHONDROCYTE_DIFFERENTIATION	GO_POSITIVE_REGULATION_OF_CHONDROCYTE_DIFFERENTIATION		16	0.322271	0.911197	0.595703	0.894385	1	1570	tags=19%, list=12%, signal=21%
GO_RIBONUCLEOSIDE_CATABOLIC_PROCESS	GO_RIBONUCLEOSIDE_CATABOLIC_PROCESS		21	0.307774	0.91116	0.60479	0.893659	1	1090	tags=19%, list=8%, signal=21%
GO_THIOL_DEPENDENT_UBIQUITIN_SPECIFIC_PROTEASE_ACTIVITY	GO_THIOL_DEPENDENT_UBIQUITIN_SPECIFIC_PROTEASE_ACTIVITY		52	0.242661	0.909832	0.592213	0.896203	1	2408	tags=23%, list=18%, signal=28%
GO_DNA_DAMAGE_RESPONSE_DETECTION_OF_DNA_DAMAGE	GO_DNA_DAMAGE_RESPONSE_DETECTION_OF_DNA_DAMAGE		33	0.351203	0.908793	0.579365	0.897952	1	1995	tags=27%, list=15%, signal=32%
GO_COMPLEMENT_ACTIVATION	GO_COMPLEMENT_ACTIVATION		46	0.391184	0.907071	0.55754	0.90148	1	1979	tags=33%, list=15%, signal=38%
GO_FERROUS_IRON_BINDING	GO_FERROUS_IRON_BINDING		15	0.358662	0.906303	0.630561	0.902613	1	1108	tags=27%, list=9%, signal=29%
GO_VACUOLAR_ACIDIFICATION	GO_VACUOLAR_ACIDIFICATION		15	0.339394	0.906283	0.577778	0.901857	1	2273	tags=40%, list=17%, signal=48%
GO_NUCLEAR_MEMBRANE	GO_NUCLEAR_MEMBRANE		204	0.219032	0.905899	0.660643	0.901988	1	3407	tags=33%, list=26%, signal=44%
GO_INTERACTION_WITH_SYMBIONT	GO_INTERACTION_WITH_SYMBIONT		45	0.264484	0.905804	0.59841	0.901428	1	2690	tags=27%, list=21%, signal=33%
GO_U2_TYPE_SPLICEOSOMAL_COMPLEX	GO_U2_TYPE_SPLICEOSOMAL_COMPLEX		23	0.31691	0.905458	0.56338	0.901515	1	2415	tags=35%, list=19%, signal=43%
GO_CHEMOATTRACTANT_ACTIVITY	GO_CHEMOATTRACTANT_ACTIVITY		24	0.364418	0.905224	0.625806	0.901342	1	205	tags=13%, list=2%, signal=13%
GO_ENDORIBONUCLEASE_COMPLEX	GO_ENDORIBONUCLEASE_COMPLEX		19	0.329139	0.904585	0.571705	0.902088	1	3386	tags=53%, list=26%, signal=71%
GO_NUCLEAR_ENVELOPE	GO_NUCLEAR_ENVELOPE		317	0.218711	0.904312	0.638211	0.901999	1	3186	tags=30%, list=24%, signal=39%
GO_RESPONSE_TO_CORTICOSTEROID	GO_RESPONSE_TO_CORTICOSTEROID		159	0.257309	0.904104	0.672619	0.901722	1	1041	tags=14%, list=8%, signal=15%
GO_MANNOSYLTRANSFERASE_ACTIVITY	GO_MANNOSYLTRANSFERASE_ACTIVITY		16	0.350832	0.904077	0.591093	0.900983	1	2858	tags=44%, list=22%, signal=56%
GO_NEGATIVE_REGULATION_OF_TOLL_LIKE_RECEPTOR_SIGNALING_PATHWAY	GO_NEGATIVE_REGULATION_OF_TOLL_LIKE_RECEPTOR_SIGNALING_PATHWAY		18	0.343839	0.903713	0.572	0.901114	1	2995	tags=33%, list=23%, signal=43%
GO_TELOMERE_MAINTENANCE_VIA_TELOMERE_LENGTHENING	GO_TELOMERE_MAINTENANCE_VIA_TELOMERE_LENGTHENING		17	0.332414	0.903459	0.579477	0.900948	1	3319	tags=47%, list=25%, signal=63%
GO_MONOVALENT_INORGANIC_ANION_HOMEOSTASIS	GO_MONOVALENT_INORGANIC_ANION_HOMEOSTASIS		16	0.345176	0.903315	0.619835	0.900502	1	2678	tags=38%, list=21%, signal=47%
GO_EMBRYONIC_PATTERN_SPECIFICATION	GO_EMBRYONIC_PATTERN_SPECIFICATION		44	0.259982	0.903108	0.657084	0.900241	1	1393	tags=18%, list=11%, signal=20%
GO_REGULATION_OF_TRANSLATION_IN_RESPONSE_TO_STRESS	GO_REGULATION_OF_TRANSLATION_IN_RESPONSE_TO_STRESS		18	0.319274	0.902596	0.612371	0.900703	1	2439	tags=28%, list=19%, signal=34%
GO_T_CELL_APOPTOTIC_PROCESS	GO_T_CELL_APOPTOTIC_PROCESS		15	0.318856	0.902138	0.606119	0.901048	1	1637	tags=20%, list=13%, signal=23%
GO_REGULATION_OF_SYNAPTIC_VESICLE_TRANSPORT	GO_REGULATION_OF_SYNAPTIC_VESICLE_TRANSPORT		25	0.305562	0.90191	0.597137	0.900842	1	567	tags=12%, list=4%, signal=13%
GO_POSITIVE_REGULATION_OF_MONOOXYGENASE_ACTIVITY	GO_POSITIVE_REGULATION_OF_MONOOXYGENASE_ACTIVITY		29	0.270347	0.900748	0.612	0.902952	1	1146	tags=17%, list=9%, signal=19%
GO_RECEPTOR_INTERNALIZATION	GO_RECEPTOR_INTERNALIZATION		47	0.289204	0.899621	0.587549	0.904895	1	2288	tags=28%, list=18%, signal=33%
GO_BROWN_FAT_CELL_DIFFERENTIATION	GO_BROWN_FAT_CELL_DIFFERENTIATION		26	0.330613	0.898992	0.637765	0.905671	1	1258	tags=23%, list=10%, signal=25%
GO_VESICLE_MEMBRANE	GO_VESICLE_MEMBRANE		392	0.211589	0.898746	0.66004	0.905481	1	2589	tags=21%, list=20%, signal=26%
GO_VITAMIN_TRANSPORTER_ACTIVITY	GO_VITAMIN_TRANSPORTER_ACTIVITY		20	0.327788	0.898615	0.663327	0.904997	1	1714	tags=25%, list=13%, signal=29%
GO_SMOOTH_ENDOPLASMIC_RETICULUM	GO_SMOOTH_ENDOPLASMIC_RETICULUM		28	0.329004	0.898524	0.621154	0.904414	1	1415	tags=25%, list=11%, signal=28%
GO_CIS_TRANS_ISOMERASE_ACTIVITY	GO_CIS_TRANS_ISOMERASE_ACTIVITY		31	0.292654	0.89784	0.612403	0.905291	1	3013	tags=35%, list=23%, signal=46%
GO_CORTICAL_ACTIN_CYTOSKELETON	GO_CORTICAL_ACTIN_CYTOSKELETON		51	0.256856	0.897635	0.629259	0.905005	1	1614	tags=18%, list=12%, signal=20%
GO_NEGATIVE_REGULATION_OF_NF_KAPPAB_IMPORT_INTO_NUCLEUS	GO_NEGATIVE_REGULATION_OF_NF_KAPPAB_IMPORT_INTO_NUCLEUS		17	0.316995	0.897502	0.608607	0.904528	1	3206	tags=41%, list=25%, signal=55%
GO_PYRIMIDINE_NUCLEOTIDE_BIOSYNTHETIC_PROCESS	GO_PYRIMIDINE_NUCLEOTIDE_BIOSYNTHETIC_PROCESS		24	0.303665	0.896826	0.59332	0.905379	1	950	tags=13%, list=7%, signal=13%
GO_HISTONE_H3_K4_METHYLATION	GO_HISTONE_H3_K4_METHYLATION		21	0.290966	0.89628	0.597656	0.905919	1	1704	tags=19%, list=13%, signal=22%
[truncated: 566 more rows]

## Sheet: Table S3
Table S3. Co-expression genes of ERCC8 in HBV-related HCC tumor tissues.
gene1	gene2	Cor	pValue
ERCC8	CRADD	0.544	0.002325
[truncated: 272 more rows]
